# Supplementary material
Source: PubMed Central journal article supplement (PMC10521972)
Supplement: NIHMS1922482-supplement-jm-2021-013077_SI_1.pdf [file NIHMS1922482-supplement-jm-2021-013077_SI_1.pdf]

## Supporting Information

### **Design of SARS-CoV-2 PLpro Inhibitors for COVID-19 Antiviral Therapy Leveraging Binding Cooperativity**

Zhengen Shen,<sup>1,2,5#</sup> Kiira Ratia,<sup>1,4#</sup> Laura Cooper,<sup>1,3#</sup> Deyu Kong,<sup>1,2</sup> Hyun Lee,<sup>1,4</sup> Youngjin Kwon,<sup>4</sup> Yangfeng Li,<sup>1,2</sup> Saad Alqarni,<sup>1</sup> Fei Huang,<sup>1,2</sup> Oleksii Dubrovskiy,<sup>1,2</sup> Lijun Rong,<sup>3</sup> Gregory R J Thatcher,<sup>1,5\*</sup> Rui Xiong<sup>1,2\*</sup>

<sup>1</sup>Department of Pharmaceutical Sciences, College of Pharmacy, University of Illinois at Chicago (UIC), Chicago, IL, 60612, USA; <sup>2</sup>UICentre (Drug Discovery @ UIC), UIC, IL, 60612, USA; <sup>3</sup>Department of Microbiology, College of Medicine, UIC, IL, 60612, USA; <sup>4</sup>Research Resources Center, UIC, IL, 60612, USA; <sup>5</sup>Department of Pharmacology & Toxicology, College of Pharmacy, University of Arizona, Tucson, AZ, 85721, USA

#These authors contributed equally to this work.

\*Corresponding authors: Rui Xiong, rxiong3@uic.edu and Gregory R J Thatcher, grjthatcher@arizona.edu

**Table of Contents**

1. Figs. S1 to S5: p3-p7
2. Tables S1 to S7: p8-p18
3. Chemical Supplementary Information: p19-53
5. Abbreviations list: p54
6. References: p55
7. NMR Spectra: p56-p128
8. HPLC Traces: p129-p136
9. Supplemental Data 2: p137

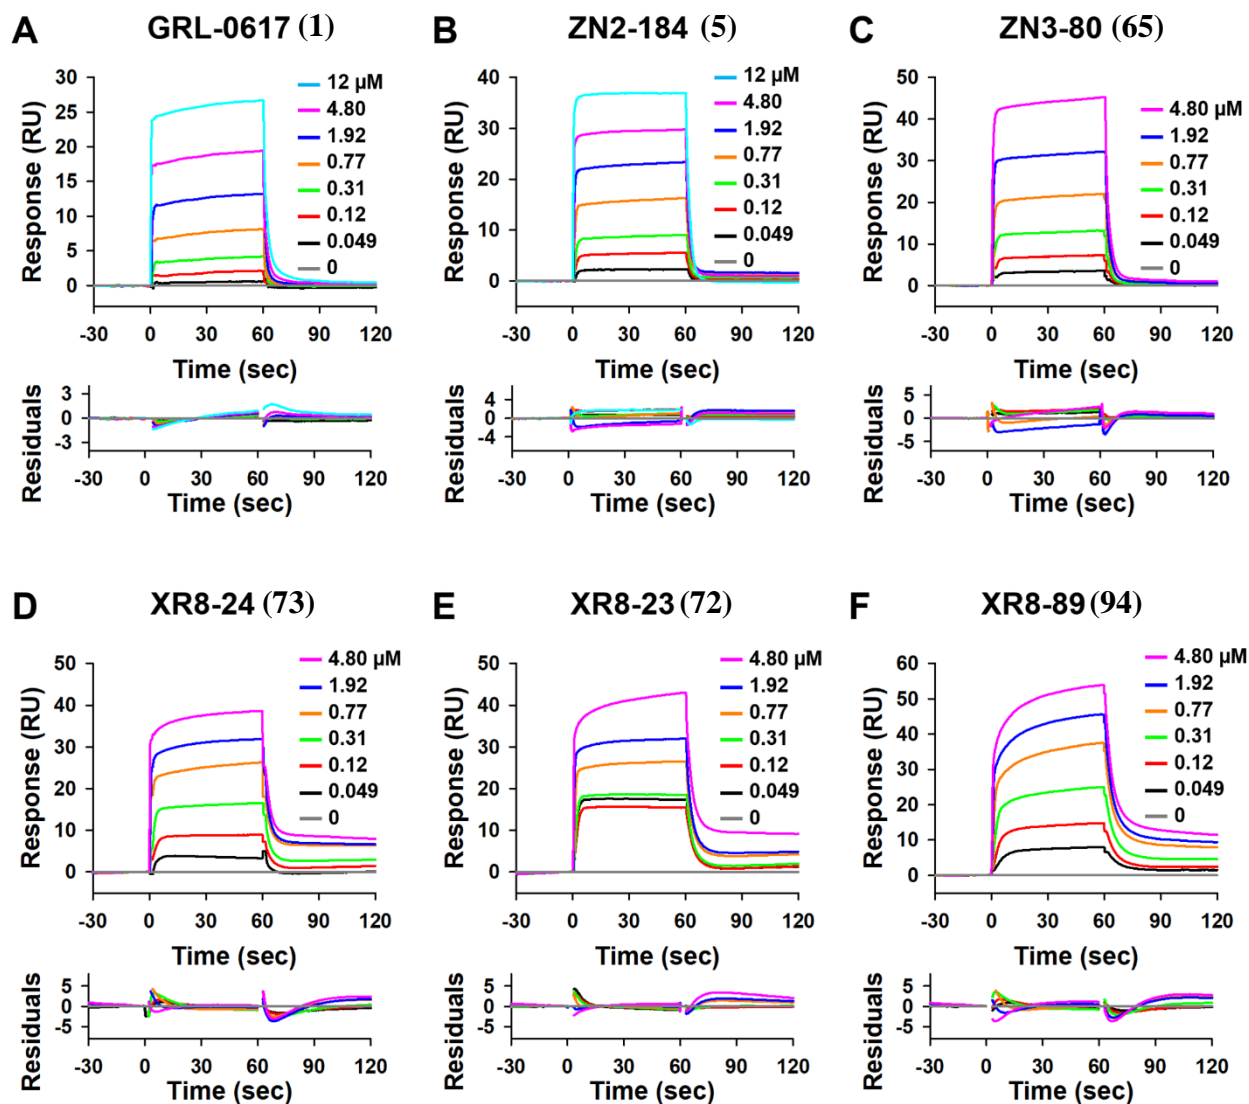

**Figure S1. SPR analysis of compound binding to SARS-CoV-2 PLpro.**

The response sensorgrams were double referenced with a reference channel and zero concentration (2% DMSO) responses, and reference-subtracted sensorgrams were fitted with a 1:1 Langmuir kinetic model using Biacore Insight evaluation software, producing two rate constants ( $k_a$  and  $k_d$ ). The equilibrium dissociation constants ( $K_D$ ) were determined from the two rate constants ( $K_D = k_d/k_a$ ). The residuals are shown below each sensorgram. **A)** SPR analysis of compound **1** binding to SARS-CoV-2 PLpro. **B)** SPR analysis of compound **5** binding to SARS-CoV-2 PLpro. **C)** SPR analysis of compound **65** binding to SARS-CoV-2 PLpro. **D)** SPR analysis of compound **73** binding to SARS-CoV-2 PLpro. **E)** SPR analysis of compound **72** binding to SARS-CoV-2 PLpro. **F)** SPR analysis of compound **94** binding to SARS-CoV-2 PLpro.

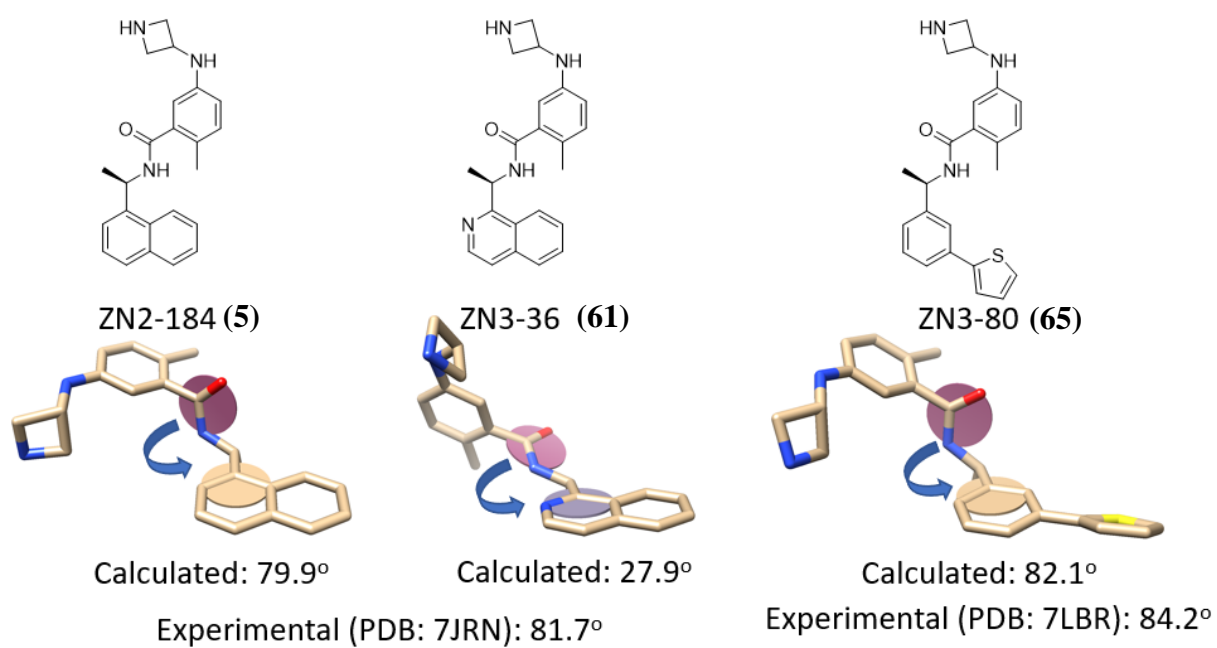

**Figure S2. Predicted angle between the amide plane and the aryl plane of PLpro ligands.**

Calculations use quantum mechanics (B3LYP/6-31G\*) with a polarizable continuum model (PCM) as the continuum solvation method for water. The torsional angle in the aniline portion of the molecule was locked using experimental angles determined in PDB 7LBR.



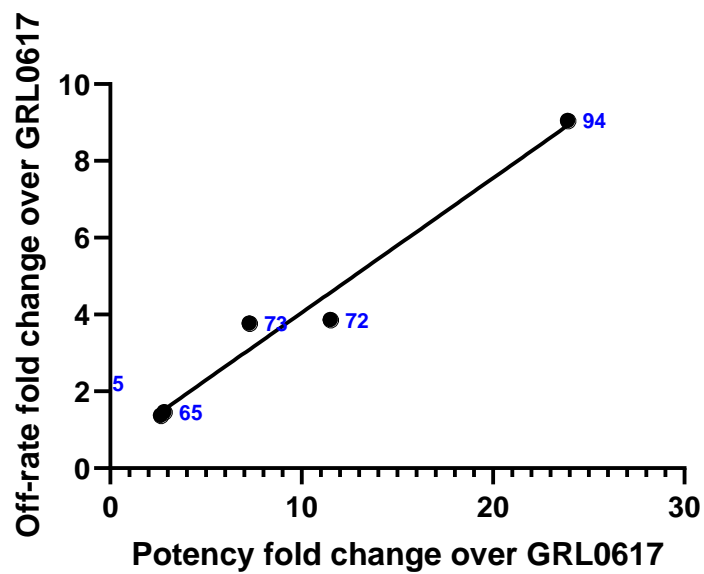

**Figure S3. Increase in potency correlates with a decrease in  $k_{\text{off}}$ .**

Compound off-rate for dissociation ( $k_{\text{d}}$ ) from PLpro is shown plotted against its equilibrium dissociation constant ( $K_{\text{D}} = k_{\text{d}}/k_{\text{a}}$ , potency), as compared to control compound GRL0617. All rates were measured by SPR.

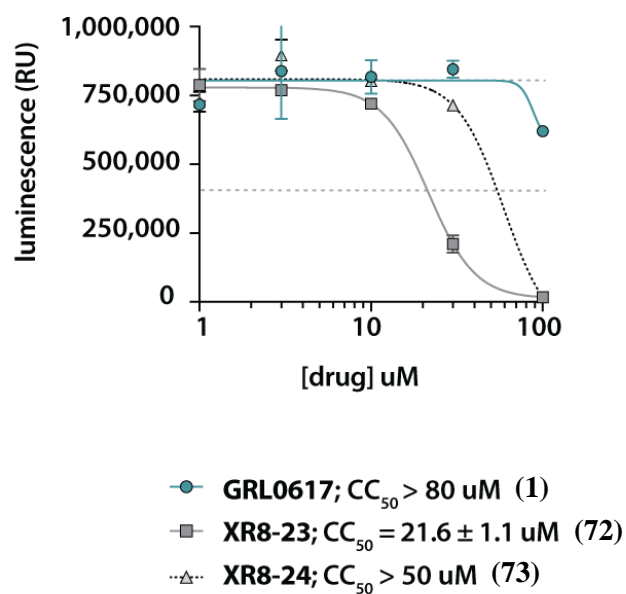

**Figure S4. Cell viability of GRL0617 (1), 72 and 73 in A549-hACE2 cells.**

Low passage A549-hACE2 cells (5000 cells/well) were seeded in 96-well plates and incubated at 37 °C and 5% CO<sub>2</sub> for 24 hours prior to a 48-hour treatment. The cytotoxicity of compounds (100 μM to 1 μM, 3-fold dilution) was examined using the CellTiter-Glo Luminescent Cell Viability Assay (Promega). Cell cytotoxicity data was normalized to DMSO control as 0% cell death.

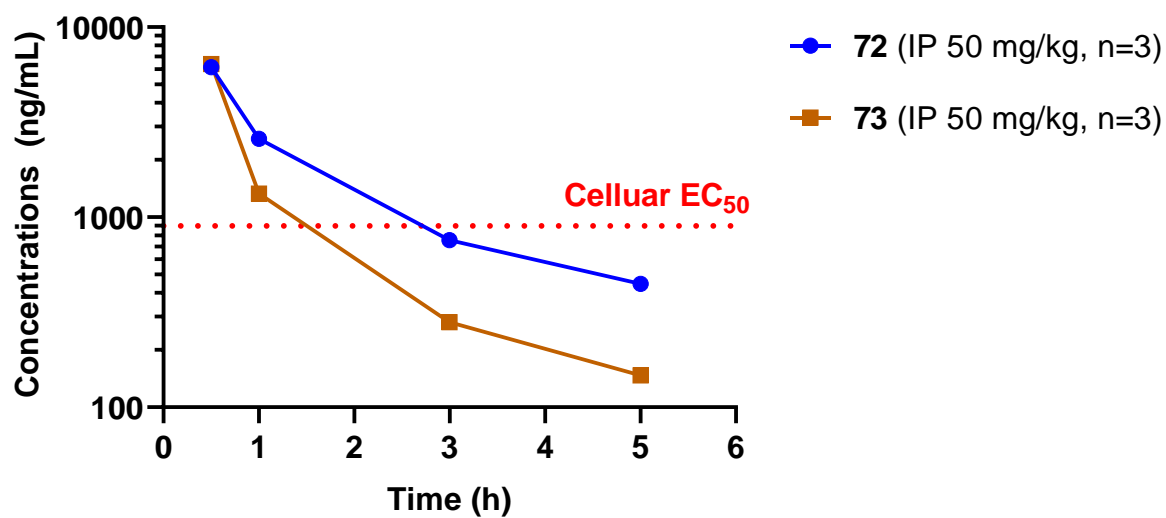

**Figure S5. Plasma concentration of 72 and 73 after 50 mg/kg IP injection in C57BL/6J Mice.** Compounds are formulated in 10% PEG400 and 90% (20% HP- $\beta$ -CD in water). Blood samples were collected at 30 min, 1 h, 3 h and 5 h. Bioanalytical analysis was performed at Pharmaron Inc.

Table S1. Structures, potency, and affinity for compounds 1-16 and 101.

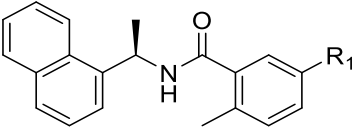

| Compound Code | No. | R <sub>1</sub>                                                                      | Enzyme inhibition<br>IC <sub>50</sub> (μM) | SPR binding<br>assays<br>K <sub>D</sub> (μM) |
|---------------|-----|-------------------------------------------------------------------------------------|--------------------------------------------|----------------------------------------------|
| GRL0617       | 1   |    | 1.61                                       | 2.70                                         |
| ZN-2-180      | 101 |    | 6.08                                       | 16.0                                         |
| ZN-2-181      | 2   |    | 1.1                                        | 4.7                                          |
| ZN-2-182      | 3   |    | 5.5                                        | 32.6                                         |
| ZN-2-183      | 4   |    | 6.0                                        | 31.1                                         |
| ZN-2-184      | 5   |    | 1.01                                       | 1.03                                         |
| ZN-2-185      | 6   |   | 0.6                                        | 1.8                                          |
| ZN-2-186      | 7   |  | 1.2                                        | 3.1                                          |
| ZN-2-187      | 8   |  | 0.8                                        | 5.4                                          |
| ZN-2-189      | 9   |  | 0.7                                        | 1.3                                          |
| ZN-2-188-1    | 10  |  | 1.6                                        | 5.6                                          |
| ZN-2-188-2    | 11  |  | 4.3                                        | 3.4                                          |
| ZN-2-197      | 12  |  | 2.4                                        | 2.8                                          |
| ZN-3-56       | 13  |  | 3.9                                        | 26.5                                         |
| DY2-144       | 14  |  | 1.3                                        | 6.0                                          |
| DY2-137       | 15  |  | 3.3                                        | 8.16                                         |
| Dy2-138-2     | 16  |  | 6.1                                        | NA                                           |

Table S2. Structures, potency, and affinity for compounds 17-34.

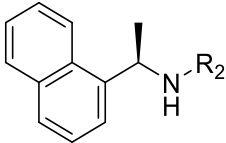

| Compound code | No. | R <sub>2</sub>                                                                      | Enzyme inhibition IC <sub>50</sub> (μM) | SPR binding assays K <sub>D</sub> (μM) |
|---------------|-----|-------------------------------------------------------------------------------------|-----------------------------------------|----------------------------------------|
| XDY-2-64      | 17  |    | >>100                                   |                                        |
| DY-3-63       | 18  |    | >>100                                   |                                        |
| ZN-2-190      | 19  |    | >>100                                   | >1000                                  |
| ZN-2-192      | 20  |    | 4.8                                     | 2.0                                    |
| ZN-2-193      | 21  |    | >10                                     | 454                                    |
| ZN-3-3        | 22  |   | >10                                     | 54.6                                   |
| DY2-109       | 23  |  | 21                                      | 83.0                                   |
| DY2-115       | 24  |  | 7                                       | 29.6                                   |
| DY-3-8        | 25  |  | >>100                                   | NA                                     |
| DY-3-14       | 26  |  | >10                                     | 88.3                                   |
| DY-3-15       | 27  |  | 0.8                                     | 418.0                                  |
| DY-3-65       | 28  |  | 6.3                                     | 43.2                                   |
| DY-3-70       | 29  |  | 6.4                                     | 43.4                                   |
| ZN-3-41       | 30  |  | 10-100                                  | >1000                                  |

|         |    |                                                                                   |        |       |
|---------|----|-----------------------------------------------------------------------------------|--------|-------|
| ZN-3-55 | 31 | 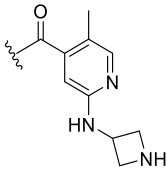 | 7.4    | 19.3  |
| ZN-3-57 | 32 |  | 10-100 | 245.5 |
| ZN-3-66 | 33 |  | 4.1    | 20.6  |
| ZN-3-70 | 34 |  | 10.7   | 41.9  |

---

Table S3. Structures, potency, and affinity for compounds 35-44.

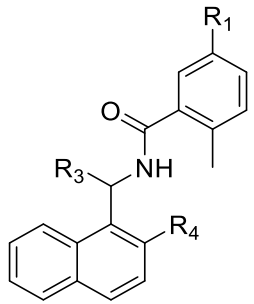

| Compound Code | No. | R <sub>1</sub>                                                                      | R <sub>3</sub>                                                                                                                                   | R <sub>4</sub>                                                                       | Enzyme inhibition IC <sub>50</sub> (μM) | SPR binding assays K <sub>D</sub> (μM) |
|---------------|-----|-------------------------------------------------------------------------------------|--------------------------------------------------------------------------------------------------------------------------------------------------|--------------------------------------------------------------------------------------|-----------------------------------------|----------------------------------------|
| ZN-3-13       | 35  | NH <sub>2</sub>                                                                     | (R/S)  -CH <sub>2</sub> -OH                                     | H                                                                                    | ~100                                    | 39.1                                   |
| ZN-3-19       | 36  | NH <sub>2</sub>                                                                     | (R)-CH <sub>3</sub>                                                                                                                              | OH                                                                                   | > 100                                   | 184.0                                  |
| DY2-97        | 37  | NH <sub>2</sub>                                                                     | (R)  -CH <sub>2</sub> -CH <sub>2</sub> -OH                      | H                                                                                    | ~100                                    | 721.5                                  |
| ZN-3-61       | 38  |    | (R)-CH <sub>2</sub> CH <sub>3</sub>                                                                                                              | H                                                                                    | >>10                                    | 281.5                                  |
| ZN-3-32       | 39  |   | (R)-CH <sub>3</sub>                                                                                                                              | OH                                                                                   | <100                                    | 240.2                                  |
| ZN-3-33       | 40  |  | (R)-CH <sub>3</sub>                                                                                                                              |  | >10                                     | 54.6                                   |
| ZN-3-34       | 41  |  | (R)-CH <sub>3</sub>                                                                                                                              |  | NI                                      | NA                                     |
| ZN-3-35       | 42  |  | (R/S)  -CH <sub>2</sub> -OH                                   | H                                                                                    | >100                                    | 186.0                                  |
| DY2-116       | 43  |  | (R)  -CH <sub>2</sub> -C(=O)-NH-CH <sub>3</sub>               | H                                                                                    | NI                                      | >1000                                  |
| DY2-117       | 44  |  | (R)  -CH <sub>2</sub> -C(=O)-N(CH <sub>3</sub> ) <sub>2</sub> | H                                                                                    | NI                                      | NA                                     |

Table S4. Structures, potency, and affinity for compounds 45-63.

| Compound Code | No. | R <sub>1</sub>  | R <sub>3</sub>        | R <sub>5</sub> | R <sub>6</sub>  | IC <sub>50</sub> (μM) | K <sub>D</sub> (μM) |
|---------------|-----|-----------------|-----------------------|----------------|-----------------|-----------------------|---------------------|
| XDY2-62       | 45  | NH <sub>2</sub> | (R)-CH <sub>3</sub>   |                | CH <sub>3</sub> | 3.3                   | 6.7                 |
| XDY2-58       | 46  | NH <sub>2</sub> | (R)-CH <sub>3</sub>   |                | CH <sub>3</sub> | <10                   | 29.7                |
| YF4-134       | 47  | NO <sub>2</sub> | (R/S)-CH <sub>3</sub> |                | CH <sub>3</sub> | >10                   | >1000               |
| YF4-136       | 48  | NH <sub>2</sub> | (R/S)-CH <sub>3</sub> |                | CH <sub>3</sub> | 4.7                   | 30.3                |
| YF4-137       | 49  | NH <sub>2</sub> | (R/S)-CH <sub>3</sub> |                | CH <sub>3</sub> | ~100                  | >1000               |
| YF4-145       | 50  | NH <sub>2</sub> | (R/S)-CH <sub>3</sub> |                | CH <sub>3</sub> | >>100                 | NA                  |
| DY-3-49       | 51  | NH <sub>2</sub> | (R)-CH <sub>3</sub>   |                | CH <sub>3</sub> | NI                    | >1000               |
| ZN-3-45       | 52  |                 | (R/S)-CH <sub>3</sub> |                | CH <sub>3</sub> | 5.7                   | 18.8                |
| DY-3-59       | 53  |                 | (R)-CH <sub>3</sub>   |                | CH <sub>3</sub> | 6.7                   | 18.3                |
| DY-3-66       | 54  |                 | (R)-CH <sub>3</sub>   |                | CH <sub>3</sub> | 3.3                   | 14.1                |
| ZN-3-59       | 55  |                 | (R)-CH <sub>3</sub>   |                | CH <sub>3</sub> | 2.4                   | 3.4                 |
| ZN-3-67       | 56  |                 | (R)-CH <sub>3</sub>   |                | Cl              | 8.5                   | 33.0                |
| ZN-3-71       | 57  |                 | (R)-CH <sub>3</sub>   |                | Cl              | 10.9                  | 64.2                |
| DY2-149       | 58  |                 | (R)-CH <sub>3</sub>   |                | CH <sub>3</sub> | 1.6                   | 8.4                 |
| ZN-3-79       | 59  |                 | (R)-CH <sub>3</sub>   |                | CH <sub>3</sub> | 1.9                   | 8.4                 |



|          |    |                                                                                   |                     |                                                                                    |                 |     |      |
|----------|----|-----------------------------------------------------------------------------------|---------------------|------------------------------------------------------------------------------------|-----------------|-----|------|
| DY-2-153 | 60 | 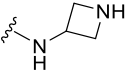 | (R)-CH <sub>3</sub> |  | CH <sub>3</sub> | 1.8 | 3.9  |
| ZN-3-36  | 61 |  | (R)-CH <sub>3</sub> |  | CH <sub>3</sub> | 56  | 19.6 |
| ZN-3-40  | 62 |  | (S)-CH <sub>3</sub> |  | CH <sub>3</sub> | NI  | NA   |
| DY2-139  | 63 |  | (R)-CH <sub>3</sub> |  | CH <sub>3</sub> | >40 | NA   |

---

Table S5 Structures, potency, and affinity for compounds 64-100.

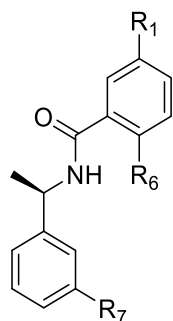

| Compound Code | No. | R <sub>1</sub> | R <sub>6</sub>  | R <sub>7</sub> | IC <sub>50</sub> (μM) | K <sub>D</sub> (μM) |
|---------------|-----|----------------|-----------------|----------------|-----------------------|---------------------|
| ZN-3-74       | 64  |                | Cl              |                | 2.8                   | NA                  |
| ZN-3-80       | 65  |                | CH <sub>3</sub> |                | 0.59                  | 0.963               |
| XR8-8         | 66  |                | CH <sub>3</sub> |                | 1.3                   | 1.39                |
| XR8-9         | 67  |                | CH <sub>3</sub> |                | 1.8                   | 2.89                |
| XR8-14        | 68  |                | CH <sub>3</sub> |                | 1.2                   | 0.846               |
| XR8-15        | 69  |                | CH <sub>3</sub> |                | 0.9                   | 1.56                |
| XR8-16        | 70  |                | CH <sub>3</sub> |                | 1.6                   | 0.43                |
| XR8-17        | 71  |                | CH <sub>3</sub> |                | 2.7                   | 0.777               |
| XR8-23        | 72  |                | CH <sub>3</sub> |                | 0.39                  | 0.235               |
| XR8-24        | 73  |                | CH <sub>3</sub> |                | 0.56                  | 0.372               |
| XR8-30        | 74  |                | CH <sub>3</sub> |                | 0.75                  | 1.15                |
| XR8-32-1      | 75  |                | CH <sub>3</sub> |                | 0.97                  | 2.06                |
| XR8-32-2      | 76  |                | CH <sub>3</sub> |                | 0.81                  | 2.4                 |
| XR8-35        | 77  |                | CH <sub>3</sub> |                | 0.92                  | 1.79                |

|        |    |                 |                 |    |       |       |
|--------|----|-----------------|-----------------|----|-------|-------|
| XR8-38 | 78 |                 | CH <sub>3</sub> |    | 0.76  | 0.741 |
| XR8-39 | 79 |                 | CH <sub>3</sub> |    | 1.1   | 1.02  |
| XR8-40 | 80 |                 | CH <sub>3</sub> |    | 0.82  | 1.42  |
| XR8-49 | 81 |                 | CH <sub>3</sub> |    | 0.64  | 0.761 |
| XR8-51 | 82 |                 | CH <sub>3</sub> |    | 1.1   | 0.776 |
| XR8-56 | 83 |                 | CH <sub>3</sub> |    | 2.2   | 1.79  |
| XR8-57 | 84 |                 | CH <sub>3</sub> |    | 0.70  | 0.668 |
| XR8-61 | 85 |                 | CH <sub>3</sub> | Br | 6.5   | 3.28  |
| XR8-65 | 86 |                 | CH <sub>3</sub> |    | 0.33  | 1.05  |
| XR8-66 | 87 |                 | CH <sub>3</sub> |    | 0.62  | 0.84  |
| XR8-67 | 88 |                 | CH <sub>3</sub> |    | 0.17  | 0.488 |
| XR8-69 | 89 |                 | CH <sub>3</sub> |    | 0.37  | NA    |
| XR8-77 | 90 |                 | CH <sub>3</sub> |    | 0.64  | 1.37  |
| XR8-79 | 91 |                 | CH <sub>3</sub> |    | 0.41  | 0.66  |
| XR8-83 | 92 |                 | CH <sub>3</sub> |    | 0.21  | 0.337 |
| XR8-84 | 93 |                 | CH <sub>3</sub> |    | 0.43  | 0.271 |
| XR8-89 | 94 |                 | CH <sub>3</sub> |    | 0.113 | 0.113 |
| XR8-96 | 95 |                 | CH <sub>3</sub> |    | 0.25  | 0.285 |
| XR8-98 | 96 | NH <sub>2</sub> | CH <sub>3</sub> |    | 0.81  | 5.33  |

|                |            |                 |                 |                                                                                    |     |      |
|----------------|------------|-----------------|-----------------|------------------------------------------------------------------------------------|-----|------|
| <b>XR8-101</b> | <b>97</b>  | NH <sub>2</sub> | CH <sub>3</sub> | 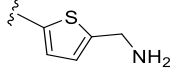 | 1.8 | 2.23 |
| <b>XR8-103</b> | <b>98</b>  | NH <sub>2</sub> | CH <sub>3</sub> |  | 1.1 | 2.4  |
| <b>XR8-104</b> | <b>99</b>  | NHAc            | CH <sub>3</sub> |  | 2.3 | 3.33 |
| <b>XR8-106</b> | <b>100</b> | NH <sub>2</sub> | CH <sub>3</sub> |  | 1.4 | 1.88 |

---

Table S6. Metabolic Stability of Test Compounds in Pooled Human Liver Microsomes

| Compound ID | Species | <i>In vitro</i> T <sub>1/2</sub> (min) | <i>In vitro</i> Cl <sub>int</sub> (μL/min/mg protein) | Scale-up Cl <sub>int</sub> (mL/min/kg) |
|-------------|---------|----------------------------------------|-------------------------------------------------------|----------------------------------------|
| Verapamil   | Human   | 13.91                                  | 99.66                                                 | 124.99                                 |
| <b>72</b>   | Human   | 235.50                                 | 5.89                                                  | 7.38                                   |
| <b>73</b>   | Human   | 144.38                                 | 9.60                                                  | 12.04                                  |
| <b>84</b>   | Human   | 5125.53                                | 0.27                                                  | 0.34                                   |
| GRL0617 (1) | Human   | 105.56                                 | 13.13                                                 | 16.47                                  |
| <b>65</b>   | Human   | 245.82                                 | 5.64                                                  | 7.07                                   |

Table S7. SPR data from 4 replicates

| Compounds   | $k_{a1}$ ( $M^{-1}s^{-1}$ ) | $k_{a2}$ ( $M^{-1}s^{-1}$ ) | $k_{a3}$ ( $M^{-1}s^{-1}$ ) | $k_{a4}$ ( $M^{-1}s^{-1}$ ) | Ave $k_a$ ( $M^{-1}s^{-1}$ ) | STD $k_a$ ( $M^{-1}s^{-1}$ ) |
|-------------|-----------------------------|-----------------------------|-----------------------------|-----------------------------|------------------------------|------------------------------|
| GRL0617 (1) | 2.02E+05                    | 1.73E+05                    | 1.45E+05                    | 1.96E+05                    | 1.79E+05                     | 2.61E+04                     |
| 5           | 4.26E+05                    | 3.48E+05                    | 2.31E+05                    | 3.56E+05                    | 3.40E+05                     | 8.08E+04                     |
| 65          | 2.91E+05                    | 3.34E+05                    | 3.03E+05                    | 4.77E+05                    | 3.51E+05                     | 8.56E+04                     |
| 73          | 4.70E+05                    | 2.71E+05                    | 1.99E+05                    | 4.17E+05                    | 3.39E+05                     | 1.26E+05                     |
| 72          | 5.42E+05                    | 5.53E+05                    | 4.14E+05                    | 5.79E+05                    | 5.22E+05                     | 7.37E+04                     |
| 94          | 5.21E+05                    | 4.27E+05                    |                             |                             | 4.74E+05                     | 6.61E+04                     |

| Compounds   | $k_{d1}$ ( $s^{-1}$ ) | $k_{d2}$ ( $s^{-1}$ ) | $k_{d3}$ ( $s^{-1}$ ) | $k_{d4}$ ( $s^{-1}$ ) | Ave $k_d$ ( $s^{-1}$ ) | STD $k_d$ ( $s^{-1}$ ) |
|-------------|-----------------------|-----------------------|-----------------------|-----------------------|------------------------|------------------------|
| GRL0617 (1) | 0.556                 | 0.464                 | 0.421                 | 0.478                 | 0.480                  | 0.056                  |
| 5           | 0.438                 | 0.407                 | 0.246                 | 0.305                 | 0.349                  | 0.089                  |
| 65          | 0.318                 | 0.369                 | 0.290                 | 0.332                 | 0.327                  | 0.033                  |
| 73          | 0.157                 | 0.110                 | 0.066                 | 0.175                 | 0.127                  | 0.049                  |
| 72          | 0.140                 | 0.153                 | 0.081                 | 0.121                 | 0.124                  | 0.031                  |
| 94          | 0.0529                | 0.0531                |                       |                       | 0.0530                 | 0.00017                |

| Compounds   | $K_D1$ (M) | $K_D2$ (M) | $K_D3$ (M) | $K_D4$ (M) | Ave $K_D$ (M) | STD $K_D$ (M) |
|-------------|------------|------------|------------|------------|---------------|---------------|
| GRL0617 (1) | 2.75E-06   | 2.69E-06   | 2.91E-06   | 2.44E-06   | 2.70E-06      | 1.94E-07      |
| 5           | 1.03E-06   | 1.17E-06   | 1.06E-06   | 8.56E-07   | 1.03E-06      | 1.31E-07      |
| 65          | 1.09E-06   | 1.10E-06   | 9.56E-07   | 6.97E-07   | 9.63E-07      | 1.90E-07      |
| 73          | 3.34E-07   | 4.04E-07   | 3.30E-07   | 4.20E-07   | 3.72E-07      | 4.70E-08      |
| 72          | 2.59E-07   | 2.77E-07   | 1.96E-07   | 2.09E-07   | 2.35E-07      | 3.89E-08      |
| 94          | 1.02E-07   | 1.24E-07   |            |            | 1.13E-07      | 1.61E-08      |

## Chemical Experimental Information

Unless otherwise specified, reactions were performed under an inert atmosphere of argon and monitored by thin-layer chromatography (TLC) and/or LCMS. All reagents and solvents were purchased from commercial suppliers (Sigma-Aldrich, Fisher Scientific, Ambeed, Combi-Blocks, Enamine, and so on) and used as provided. Synthetic intermediates were purified using CombiFlash chromatography system on 230–400 mesh silica gel or Shimadzu prep-HPLC system (0.05% formic acid were added).  $^1\text{H}$  and  $^{13}\text{C}$  NMR spectra were obtained using Bruker DPX-400 or AVANCE-400 spectrometer at 400 and 100 MHz, respectively. NMR chemical shifts were described in  $\delta$  (ppm) using residual solvent peaks as standard (Chloroform- $d$ , 7.26 ppm ( $^1\text{H}$ ), 77.16 ppm ( $^{13}\text{C}$ ); Methanol- $d_4$ , 3.31 ppm ( $^1\text{H}$ ), 49.00 ppm ( $^{13}\text{C}$ ); DMSO- $d_6$ , 2.50 ppm ( $^1\text{H}$ ), 39.52 ppm ( $^{13}\text{C}$ ); Acetone- $d_6$ , 2.05 ppm ( $^1\text{H}$ ), 29.84 ppm ( $^{13}\text{C}$ )). Data were reported in a format as follows: chemical shift, multiplicity (s = singlet, d = doublet, dd = doublet of doublet, t = triplet, q = quartet, br = broad, m = multiplet, abq = ab quartet), number of protons, and coupling constants. High resolution mass spectral data were measured in-house using a Shimadzu IT-TOF LC/MS for all final compounds. Optical rotations were measured with a Perkin-Elmer 241 polarimeter operating on the mercury lamp line (546 nm), using a 100 mm pathlength cell. All compounds submitted for biological testing were confirmed to be  $\geq 95\%$  pure by analytical HPLC. The names of the compounds were obtained using ChemDraw Ver.20.0.0.41. Synthetic methods, spectral data, and HRMS for novel compounds are described in detail below.

### Examples of synthetic routes

#### Example 1

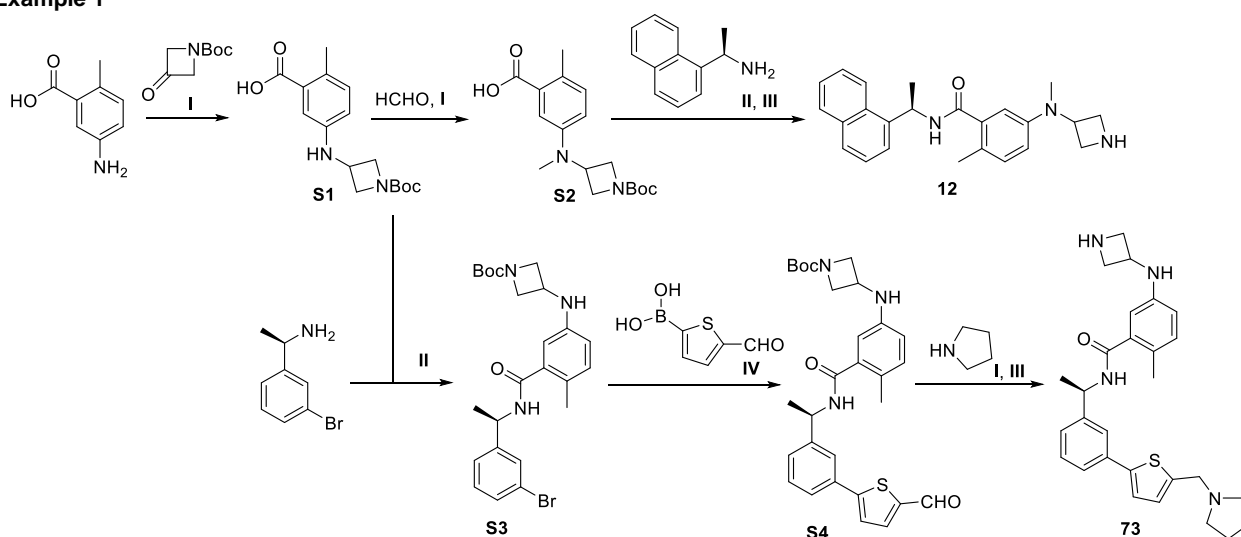

I. HOAc,  $\text{NaBH}_3\text{CN}$ , MeOH; II. HATU, DMAP, DMF, rt; III. HCl (4M in dioxane), DCM; IV. XPhos Pd G2,  $\text{K}_3\text{PO}_4$ , DMF/EtOH/ $\text{H}_2\text{O}$ , 95 °C

#### Example 2

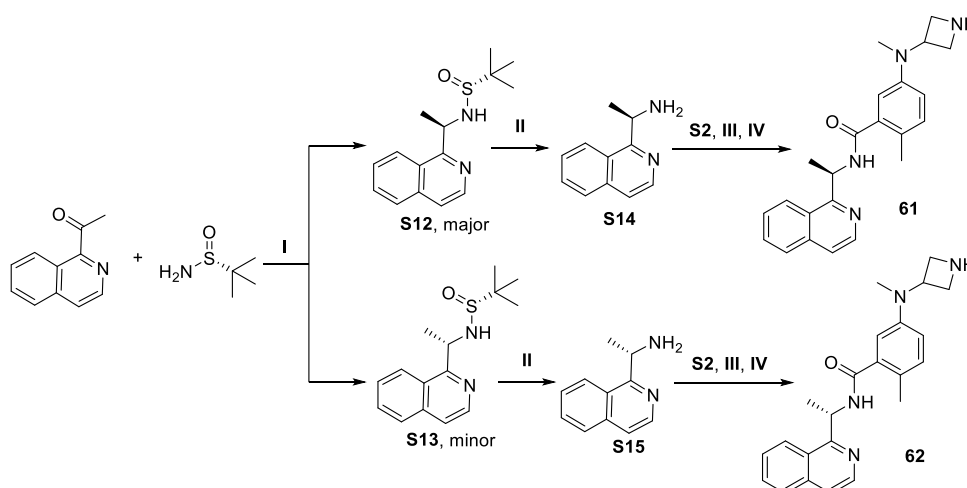

I.  $\text{Ti}(\text{OEt})_4$ ,  $\text{NaBH}_4$ , THF, -78 °C to rt; II. HCl (Con. aq.), dioxane; III. HATU, DMAP, DMF, rt; IV. HCl (4M in dioxane), DCM

## Chemical Experimental Procedures

**General Procedure for Reductive Amination.** To a solution of amine compound and ketone (or aldehyde) compound in MeOH, HOAc was added. After stirring at the indicated temperature for 2 h and cooldown,  $\text{NaBH}_3\text{CN}$  was added carefully. The reaction was continued at room temperature overnight and then concentrated under vacuum. Dissolve the mixture in EA and wash with water and brine. After

that, the organic layer was dried over  $\text{Na}_2\text{SO}_4$ , filtered, and concentrated. The residue was purified by silica gel column chromatography or Prep-HPLC to provide the amination compound.

**General Procedure for Amine Coupling.** Amine compound, acid compound, HATU, TEA (or DIPEA) and DMAP were dissolved in dry DMF or DCM and stirred at room temperature overnight. The mixture was diluted with ethyl acetate and was then washed with saturated aq.  $\text{NaHCO}_3$ , water, and brine, respectively. The organic layer was dried over  $\text{Na}_2\text{SO}_4$ , filtered, and concentrated. The residue was purified by silica gel column chromatography or Prep-HPLC to provide the desired amide.

**General Procedure for N-Boc Deprotection.** To a solution of Boc protected compound in DCM was added HCl (4M in dioxane) at 0 °C, and then warmed up to room temperature. After stirring for another 2 h, the reaction was dried under vacuum. The residue was purified by Prep-HPLC to provide the deprotected compound.

**General Procedure for Aryl Nitro Reduction.** To a solution of Aryl Nitro compound in ethanol/saturated aq.  $\text{NH}_4\text{Cl}$  (4:1), Fe powder was added. The resulting solution was stirred for 2 h at 80 °C. After cooling down, the mixture was extracted with ethyl acetate 3 times. The organic layer was washed with brine, dried and concentrated under vacuum. The residue was purified by silica gel column chromatography or Prep-HPLC to obtain the desired product.

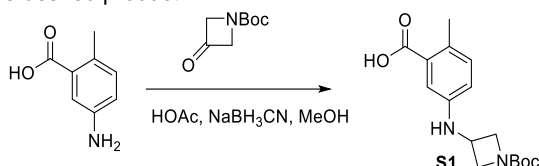

**5-((1-(tert-butoxycarbonyl)azetidin-3-yl)amino)-2-methylbenzoic acid (S1).** 5-amino-2-methylbenzoic acid (3.0 g, 19.8 mmol) and tert-butyl 3-oxoazetidine-1-carboxylate (10.1 g, 59.5 mmol) was subjected to general reductive amination procedure with MeOH (20 mL), HOAc (5 mL) at 50 °C, and then  $\text{NaBH}_3\text{CN}$  (6.2 g, 99.0 mmol) was added. The purification by silica gel column chromatography (Hexenes/EtOAc, 1:1) provided the amination compound (5.1 g, yield 83%) as a white solid:  $^1\text{H}$  NMR (400 MHz, Chloroform- $d$ )  $\delta$  7.16 (d,  $J$  = 2.6 Hz, 1H), 7.07 (d,  $J$  = 8.3 Hz, 1H), 6.62 (dd,  $J$  = 8.3, 2.6 Hz, 1H), 4.33 – 4.27 (m, 2H), 4.24 – 4.18 (m, 1H), 3.76 – 3.70 (m, 2H), 2.49 (s, 3H), 1.43 (d,  $J$  = 2.1 Hz, 9H); LRMS (ESI) calcd for  $\text{C}_{16}\text{H}_{23}\text{N}_2\text{O}_4$  [ $\text{M}+\text{H}$ ] $^+$  307.2, found 307.1.

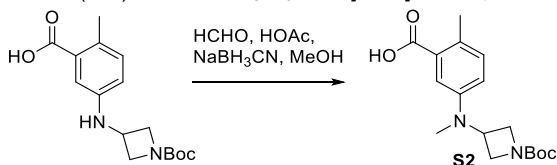

**5-((1-(tert-butoxycarbonyl)azetidin-3-yl)(methyl)amino)-2-methylbenzoic acid (S2).** 5-((1-(tert-butoxycarbonyl)azetidin-3-yl)amino)-2-methylbenzoic acid (2.3 g, 7.5 mmol) and formaldehyde (37 wt. % in  $\text{H}_2\text{O}$ , 2 mL) was subjected to general reductive amination procedure with MeOH (10 mL), HOAc (2 mL) at room temperature, and then  $\text{NaBH}_3\text{CN}$  (2.4 g, 37.5 mmol) was added. The purification by silica gel column chromatography (Hexenes/EtOAc, 2:1) provided the amination compound (2.1 g, yield 87%) as a colorless oil:  $^1\text{H}$  NMR (400 MHz, Methanol- $d_4$ )  $\delta$  7.31 (d,  $J$  = 2.8 Hz, 1H), 7.13 (d,  $J$  = 8.4 Hz, 1H), 6.88 (dd,  $J$  = 8.3, 2.8 Hz, 1H), 4.22 (tt,  $J$  = 7.0, 5.0 Hz, 1H), 4.14 (t,  $J$  = 8.0 Hz, 2H), 3.84 (dd,  $J$  = 8.9, 5.0 Hz, 2H), 2.83 (s, 3H), 2.46 (s, 3H), 1.43 (s, 9H); LRMS (ESI) calcd for  $\text{C}_{17}\text{H}_{25}\text{N}_2\text{O}_4$  [ $\text{M}+\text{H}$ ] $^+$  321.2, found 321.2.

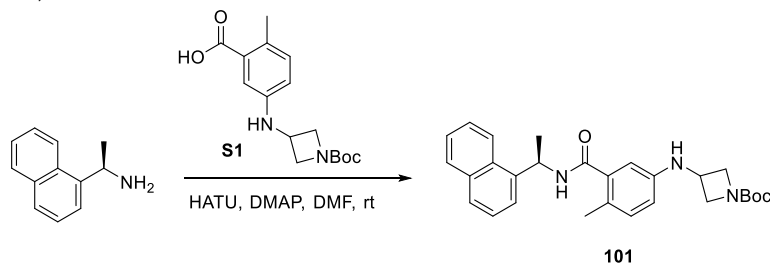

**Tert-butyl (R)-3-((4-methyl-3-((1-(naphthalen-1-yl)ethyl)carbamoyl)phenyl)amino)azetidine-1-carboxylate (101).** (R)-1-(naphthalen-1-yl)ethan-1-amine (300 mg, 1.75 mmol), 5-((1-(tert-butoxycarbonyl)azetidin-3-yl)amino)-2-methylbenzoic acid (S1) (482 mg, 1.58 mmol), HATU (684 mg, 1.80 mmol) and DMAP (428 mg, 3.5 mmol) was subjected to general amine coupling procedure with DMF (4 mL). The purification by Prep-HPLC afforded the compound 1 (667 mg, yield 92%) as a white solid:  $[\alpha]_{\text{D}}^{25} = -82.6$  (c 6.7, MeOH);  $^1\text{H}$  NMR (400 MHz, Methanol- $d_4$ )  $\delta$  8.69 (d,  $J$  = 8.2 Hz, 1H), 8.27 – 8.19 (m, 1H), 7.89 – 7.85 (m, 1H), 7.80 – 7.76 (m, 1H), 7.63 – 7.59 (m, 1H), 7.58 – 7.52 (m, 1H), 7.51 – 7.43 (m, 2H), 6.97 – 6.94 (m, 1H), 6.51 – 6.46 (m, 2H), 6.06 – 5.98 (m, 1H), 4.17 – 4.01 (m, 3H), 3.68 – 3.61 (m, 2H), 2.21 (s, 3H), 1.67 (d,  $J$  = 6.9 Hz, 3H), 1.43 (s, 9H).  $^{13}\text{C}$  NMR (100 MHz, Methanol- $d_4$ )  $\delta$  172.40, 158.02, 146.11, 140.32, 138.66, 138.61, 135.38, 132.42, 132.33, 129.88, 128.93, 127.22, 126.68, 126.39, 125.13, 124.35, 123.77, 115.46, 112.84, 80.96, 46.35, 46.25, 44.09, 28.66, 21.37, 18.66; HRMS (ESI) calcd for  $\text{C}_{28}\text{H}_{34}\text{N}_3\text{O}_3$  [ $\text{M}+\text{H}$ ] $^+$  460.2595, found 460.2590.

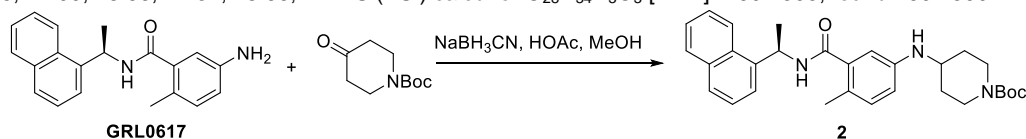

**Tert-butyl (R)-4-((4-methyl-3-((1-(naphthalen-1-yl)ethyl)carbamoyl)phenyl)amino)piperidine-1-carboxylate (2).** (R)-5-amino-2-methyl-N-(1-(naphthalen-1-yl)ethyl)benzamide (30 mg, 0.10 mmol) and tert-butyl 4-oxopiperidine-1-carboxylate (100 mg, 0.50 mmol)



was subjected to general reductive amination procedure with MeOH (1 mL), HOAc (0.2 mL) at 50 °C, and then NaBH<sub>3</sub>CN (32 mg, 0.50 mmol) was added. The purification by Prep-HPLC afforded the **2** (42 mg, yield 86%) as a white solid:  $[\alpha]_{546}^{25} = -75.0$  (c 0.3, MeOH); <sup>1</sup>H NMR (400 MHz, Methanol-*d*<sub>4</sub>) δ 8.72 (d, *J* = 8.2 Hz, 1H), 8.28 – 8.21 (m, 1H), 7.90 (dd, *J* = 8.1, 1.4 Hz, 1H), 7.81 (d, *J* = 8.2 Hz, 1H), 7.63 (d, *J* = 7.1 Hz, 1H), 7.61 – 7.43 (m, 3H), 6.98 (d, *J* = 8.3 Hz, 1H), 6.66 (dd, *J* = 8.2, 2.5 Hz, 1H), 6.61 (d, *J* = 2.5 Hz, 1H), 6.02 (td, *J* = 6.8, 4.9 Hz, 1H), 4.02 – 3.93 (m, 2H), 3.41 – 3.33 (m, 1H), 2.95 – 2.83 (m, 2H), 2.21 (s, 3H), 1.96 – 1.88 (m, 2H), 1.70 (d, *J* = 6.9 Hz, 3H), 1.46 (s, 9H), 1.33 – 1.21 (m, 2H); <sup>13</sup>C NMR (100 MHz, Methanol-*d*<sub>4</sub>) δ 172.56, 156.48, 140.33, 138.70, 138.65, 135.48, 132.41, 129.91, 128.98, 127.24, 126.71, 126.41, 124.38, 123.80, 116.56, 113.79, 81.06, 51.60, 46.40, 46.31, 32.88, 28.68, 21.30, 18.57. HRMS (ESI) calcd for C<sub>30</sub>H<sub>38</sub>N<sub>3</sub>O<sub>3</sub> [M+H]<sup>+</sup> 488.2908, found 488.2957.

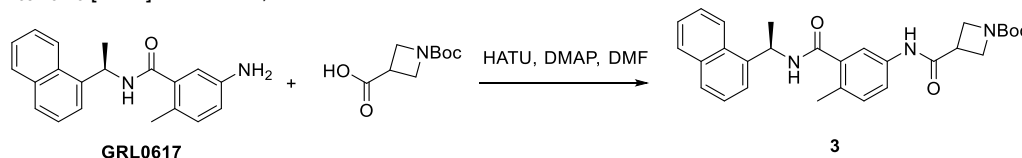

**Tert-butyl (R)-3-((4-methyl-3-((1-(naphthalen-1-yl)ethyl)carbamoyl)phenyl)carbamoyl)azetidine-1-carboxylate (3).** GRL0617 (30 mg, 0.10 mmol), 1-(tert-butoxycarbonyl)azetidine-3-carboxylic acid (30 mg, 0.15 mmol), HATU (57 mg, 0.15 mmol) and DMAP (37 mg, 0.30 mmol) was subjected to general amine coupling procedure with DMF (1 mL). The purification by Prep-HPLC afforded the product **3** (44 mg, yield 90%) as a white solid:  $[\alpha]_{546}^{25} = -75.0$  (c 0.2, MeOH); <sup>1</sup>H NMR (400 MHz, Methanol-*d*<sub>4</sub>) δ 8.26 (d, *J* = 8.5 Hz, 1H), 7.93 – 7.88 (m, 1H), 7.83 – 7.78 (m, 1H), 7.66 – 7.63 (m, 1H), 7.60 – 7.46 (m, 5H), 7.18 (d, *J* = 8.3 Hz, 1H), 6.05 (q, *J* = 6.9 Hz, 1H), 4.08 (d, *J* = 7.5 Hz, 4H), 3.46 (p, *J* = 7.3 Hz, 1H), 2.30 (s, 3H), 1.71 (d, *J* = 6.9 Hz, 3H), 1.45 (s, 9H); <sup>13</sup>C NMR (100 MHz, Methanol-*d*<sub>4</sub>) δ 172.71, 171.53, 158.07, 140.30, 138.38, 137.31, 135.48, 132.61, 132.37, 132.11, 129.90, 128.98, 127.30, 126.73, 126.43, 124.29, 123.71, 122.49, 119.95, 81.27, 46.37, 34.85, 28.62, 21.40, 19.06; HRMS (ESI) calcd for C<sub>30</sub>H<sub>38</sub>N<sub>3</sub>O<sub>3</sub> [M+H]<sup>+</sup> 488.2544, found 488.2534.

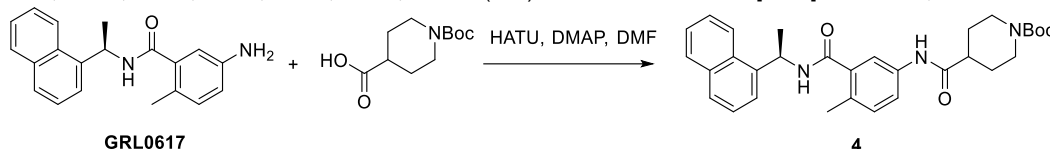

**Tert-butyl (R)-4-((4-methyl-3-((1-(naphthalen-1-yl)ethyl)carbamoyl)phenyl)carbamoyl)piperidine-1-carboxylate (4).** GRL0617 (30 mg, 0.10 mmol), 1-(tert-butoxycarbonyl)piperidine-4-carboxylic acid (35 mg, 0.15 mmol), HATU (57 mg, 0.15 mmol) and DMAP (37 mg, 0.30 mmol) was subjected to general amine coupling procedure with DMF (1 mL). The purification by Prep-HPLC afforded the product **4** (48 mg, yield 93%) as a white solid:  $[\alpha]_{546}^{25} = -77.0$  (c 0.1, MeOH); <sup>1</sup>H NMR (400 MHz, Methanol-*d*<sub>4</sub>) δ 8.25 (d, *J* = 8.5 Hz, 1H), 7.92 – 7.88 (m, 1H), 7.83 – 7.79 (m, 1H), 7.65 – 7.62 (m, 1H), 7.60 – 7.44 (m, 5H), 7.17 (d, *J* = 8.3 Hz, 1H), 6.05 (q, *J* = 6.9 Hz, 1H), 4.17 – 4.09 (m, 2H), 2.89 – 2.76 (m, 2H), 2.56 – 2.47 (m, 1H), 2.30 (s, 3H), 1.84 – 1.77 (m, 2H), 1.70 (d, *J* = 6.9 Hz, 3H), 1.68 – 1.57 (m, 2H), 1.47 (s, 9H); <sup>13</sup>C NMR (100 MHz, Methanol-*d*<sub>4</sub>) δ 175.92, 171.58, 156.42, 140.30, 139.22, 138.31, 137.47, 135.47, 132.42, 132.06, 129.90, 128.98, 127.29, 126.73, 126.43, 124.29, 123.70, 122.56, 120.03, 81.17, 46.36, 44.72, 29.64, 28.68, 21.42, 19.06; HRMS (ESI) calcd for C<sub>31</sub>H<sub>38</sub>N<sub>3</sub>O<sub>4</sub> [M+H]<sup>+</sup> 516.2857, found 516.2892.

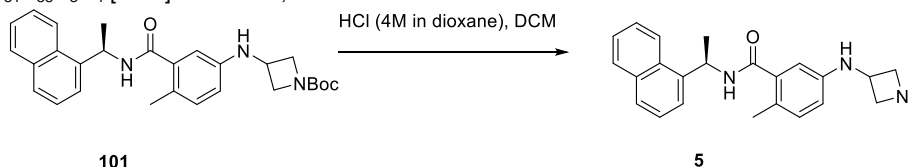

**(R)-5-((azetidin-3-ylamino)-2-methyl-N-(1-(naphthalen-1-yl)ethyl)benzamide (5).** General procedure for N-Boc deprotection was used with **101** (20 mg, 0.04 mmol) in DCM (1 mL) and HCl (4M in dioxane, 100 μL). The purification by Prep-HPLC afforded the product **5** (12 mg, yield 84%) as a light brown solid:  $[\alpha]_{546}^{25} = -87.4$  (c 0.8, MeOH); <sup>1</sup>H NMR (400 MHz, Methanol-*d*<sub>4</sub>) δ 8.53 (s, 1H), 8.28 – 8.21 (m, 1H), 7.93 – 7.88 (m, 1H), 7.84 – 7.78 (m, 1H), 7.64 – 7.61 (m, 1H), 7.60 – 7.45 (m, 3H), 7.03 – 6.99 (m, 1H), 6.57 – 6.52 (m, 1H), 6.51 – 6.48 (m, 1H), 6.07 – 6.00 (m, 1H), 4.43 (p, *J* = 7.0 Hz, 1H), 4.33 – 4.25 (m, 2H), 3.93 – 3.85 (m, 2H), 2.21 (s, 3H), 1.70 (d, *J* = 6.9 Hz, 3H); <sup>13</sup>C NMR (100 MHz, Methanol-*d*<sub>4</sub>) δ 172.26, 145.38, 140.32, 138.85, 135.47, 132.61, 132.36, 129.93, 128.98, 127.24, 126.73, 126.42, 125.82, 124.32, 123.80, 115.53, 112.83, 54.85, 46.86, 46.32, 21.35, 18.59; HRMS (ESI) calcd for C<sub>23</sub>H<sub>26</sub>N<sub>3</sub>O [M+H]<sup>+</sup> 360.2070, found 360.2076.

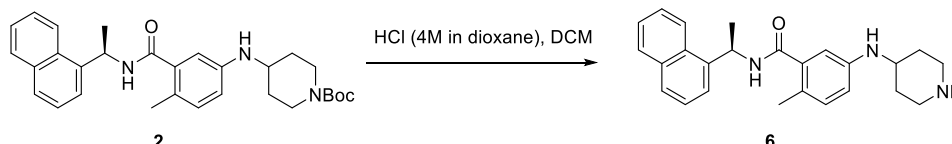

**(R)-2-methyl-N-(1-(naphthalen-1-yl)ethyl)-5-(piperidin-4-ylamino)benzamide (6).** General procedure for N-Boc deprotection was used with **2** (20 mg, 0.04 mmol) in DCM (1 mL) and HCl (4M in dioxane, 100 μL). The purification by Prep-HPLC afforded the product **6** (14 mg, yield 90%) as a light brown solid:  $[\alpha]_{546}^{25} = -75.4$  (c 1.2, MeOH); <sup>1</sup>H NMR (400 MHz, Methanol-*d*<sub>4</sub>) δ 8.48 (s, 1H), 8.27 – 8.22 (m, 1H), 7.93 – 7.87 (m, 1H), 7.84 – 7.77 (m, 1H), 7.63 (d, *J* = 7.2 Hz, 1H), 7.59 – 7.45 (m, 3H), 7.01 – 6.97 (m, 1H), 6.67 – 6.63 (m, 1H), 6.61 – 6.59 (m, 1H), 6.03 (q, *J* = 6.9 Hz, 1H), 3.51 (tt, *J* = 9.3, 3.5 Hz, 1H), 3.41 – 3.35 (m, 2H), 3.09 – 2.99 (m, 2H), 2.20 (s, 3H), 2.17 – 2.10 (m, 2H), 1.69 (d, *J* = 7.0 Hz, 3H), 1.66 – 1.54 (m, 2H); <sup>13</sup>C NMR (100 MHz, Methanol-*d*<sub>4</sub>) δ 172.58, 146.22, 140.37, 138.72, 135.46, 132.46, 132.36, 129.92, 128.96, 127.24, 126.71, 126.44, 124.62, 124.36, 123.80, 115.92, 113.18, 48.32, 46.32, 43.92, 29.92, 21.37, 18.57; HRMS (ESI) calcd for C<sub>25</sub>H<sub>30</sub>N<sub>3</sub>O [M+H]<sup>+</sup> 388.2383, found 388.2389.

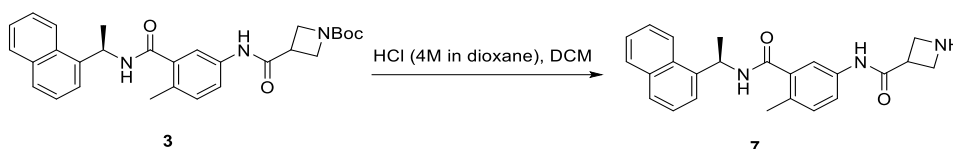

**(R)-N-(4-methyl-3-((1-(naphthalen-1-yl)ethyl)carbamoyl)phenyl)azetidino-3-carboxamide (7).** General procedure for N-Boc deprotection was used with **3** (20 mg, 0.04 mmol) in DCM (1 mL) and HCl (4M in dioxane, 100  $\mu$ L). The purification by Prep-HPLC afforded the product **7** (14 mg, yield 88%) as a white solid:  $[\alpha]_{546}^{25} = -94.9$  (c 0.5, MeOH);  $^1\text{H NMR}$  (400 MHz, Methanol- $d_4$ )  $\delta$  8.34 (s, 1H), 8.26 (d,  $J = 8.5$  Hz, 1H), 7.90 (dd,  $J = 8.2, 1.5$  Hz, 1H), 7.81 (d,  $J = 8.1$  Hz, 1H), 7.67 – 7.42 (m, 6H), 7.19 (td,  $J = 7.6, 7.0, 4.8$  Hz, 1H), 6.11 – 6.01 (m, 1H), 4.25 (t,  $J = 6.6$  Hz, 2H), 3.99 – 3.73 (m, 2H), 3.43 (dd,  $J = 14.0, 9.1$  Hz, 1H), 2.31 (s, 3H), 1.71 (d,  $J = 6.9$  Hz, 3H);  $^{13}\text{C NMR}$  (100 MHz, Methanol- $d_4$ )  $\delta$  171.49, 169.74, 140.26, 138.14, 137.02, 135.46, 132.81, 132.35, 132.10, 129.91, 129.00, 127.31, 126.74, 126.42, 124.27, 123.71, 122.51, 119.95, 47.60, 46.36, 39.88, 21.43, 19.09; HRMS (ESI) calcd for  $\text{C}_{24}\text{H}_{26}\text{N}_3\text{O}_2$   $[\text{M}+\text{H}]^+$  388.2020, found 388.2028.

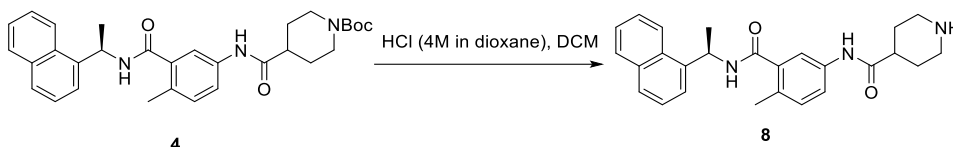

**(R)-N-(4-methyl-3-((1-(naphthalen-1-yl)ethyl)carbamoyl)phenyl)piperidine-4-carboxamide (8).** General procedure for N-Boc deprotection was used with **4** (20 mg, 0.04 mmol) in DCM (1 mL) and HCl (4M in dioxane, 100  $\mu$ L). The purification by Prep-HPLC afforded the product **8** (14 mg, yield 84%) as a white solid:  $[\alpha]_{546}^{25} = -96.1$  (c 0.6, MeOH);  $^1\text{H NMR}$  (400 MHz, Methanol- $d_4$ )  $\delta$  8.52 (s, 1H), 8.28 – 8.22 (m, 1H), 7.93 – 7.88 (m, 1H), 7.83 – 7.78 (m, 1H), 7.66 – 7.62 (m, 1H), 7.60 – 7.45 (m, 5H), 7.20 – 7.16 (m, 1H), 6.05 (q,  $J = 6.9$  Hz, 1H), 3.45 (dt,  $J = 13.0, 3.8$  Hz, 2H), 3.04 (td,  $J = 12.5, 3.4$  Hz, 2H), 2.67 (tt,  $J = 10.8, 4.0$  Hz, 1H), 2.31 (s, 3H), 2.09 – 1.89 (m, 4H), 1.70 (d,  $J = 6.9$  Hz, 3H);  $^{13}\text{C NMR}$  (100 MHz, Methanol- $d_4$ )  $\delta$  174.20, 171.52, 140.28, 138.41, 137.28, 135.47, 132.55, 132.36, 132.11, 129.91, 128.99, 127.30, 126.74, 126.42, 124.28, 123.71, 122.52, 119.99, 46.35, 44.24, 41.59, 26.65, 21.41, 19.07; HRMS (ESI) calcd for  $\text{C}_{26}\text{H}_{30}\text{N}_3\text{O}_2$   $[\text{M}+\text{H}]^+$  416.2333, found 416.2340.

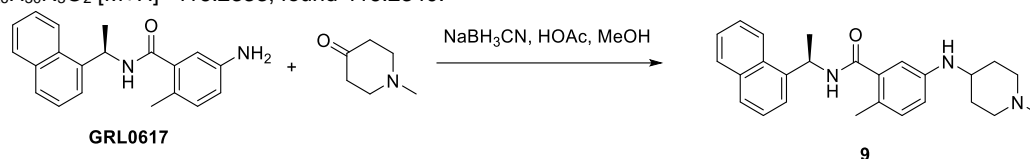

**(R)-2-methyl-5-((1-methylpiperidin-4-yl)amino)-N-(1-(naphthalen-1-yl)ethyl)benzamide (9).** GRL0617 (30 mg, 0.10 mmol) and 1-methylpiperidin-4-one (60 mg, 0.50 mmol) was subjected to general reductive amination procedure with MeOH (1 mL), HOAc (0.2 mL) at 50  $^{\circ}\text{C}$ , and then  $\text{NaBH}_3\text{CN}$  (32 mg, 0.50 mmol) was added. The purification by Prep-HPLC afforded the product **9** (34 mg, yield 85%) as a white solid:  $[\alpha]_{546}^{25} = -76.9$  (c 3.0, MeOH);  $^1\text{H NMR}$  (400 MHz, Methanol- $d_4$ )  $\delta$  8.54 – 8.48 (m, 1H), 8.24 (d,  $J = 8.4$  Hz, 1H), 7.93 – 7.87 (m, 1H), 7.83 – 7.76 (m, 1H), 7.65 – 7.62 (m, 1H), 7.59 – 7.45 (m, 3H), 7.00 – 6.97 (m, 1H), 6.66 – 6.59 (m, 2H), 6.02 (q,  $J = 6.9$  Hz, 1H), 3.51 – 3.44 (m, 1H), 3.39 – 3.33 (m, 2H), 3.07 – 2.95 (m, 2H), 2.75 (s, 3H), 2.21 (s, 3H), 2.15 – 2.06 (m, 2H), 1.71 – 1.58 (m, 5H);  $^{13}\text{C NMR}$  (100 MHz, Methanol- $d_4$ )  $\delta$  169.70, 146.22, 140.48, 138.70, 135.40, 132.49, 132.28, 129.93, 128.92, 127.25, 126.73, 126.49, 124.60, 124.31, 123.75, 115.87, 113.21, 53.95, 47.46, 46.36, 43.58, 30.21, 21.48, 18.60; HRMS (ESI) calcd for  $\text{C}_{26}\text{H}_{32}\text{N}_3\text{O}$   $[\text{M}+\text{H}]^+$  402.2540, found 416.2545.

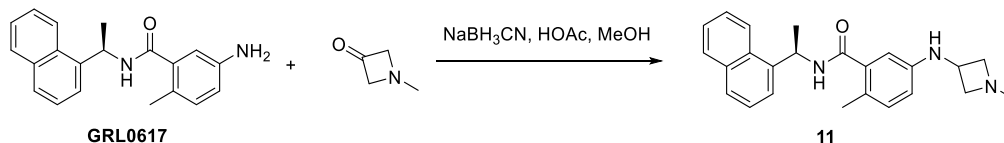

**(R)-2-methyl-5-((1-methylazetidino-3-yl)amino)-N-(1-(naphthalen-1-yl)ethyl)benzamide (11).** GRL0617 (100 mg, 0.31 mmol) and 1-methylazetidino-3-one (40 mg, 0.49 mmol) was subjected to general reductive amination procedure with MeOH (4 mL), HOAc (1 mL) at 50  $^{\circ}\text{C}$ , and then  $\text{NaBH}_3\text{CN}$  (98 mg, 1.55 mmol) was added. The purification by Prep-HPLC afforded the product **11** (110 mg, yield 95%) as a white solid:  $[\alpha]_{546}^{25} = -82.1$  (c 1.3, MeOH);  $^1\text{H NMR}$  (400 MHz, Methanol- $d_4$ )  $\delta$  8.46 (s, 1H), 8.24 (d,  $J = 8.4$  Hz, 1H), 7.93 – 7.87 (m, 1H), 7.81 (d,  $J = 8.2$  Hz, 1H), 7.65 – 7.45 (m, 4H), 7.01 (d,  $J = 8.2$  Hz, 1H), 6.58 – 6.48 (m, 2H), 6.03 (q,  $J = 6.9$  Hz, 1H), 4.44 – 4.32 (m, 3H), 3.94 – 3.84 (m, 2H), 2.90 (s, 3H), 2.21 (s, 3H), 1.69 (d,  $J = 6.9$  Hz, 3H);  $^{13}\text{C NMR}$  (100 MHz, Methanol- $d_4$ )  $\delta$  172.22, 145.34, 140.35, 138.84, 135.45, 132.62, 132.34, 129.93, 128.97, 127.25, 126.73, 126.44, 125.94, 124.32, 123.79, 115.57, 112.94, 63.95, 46.34, 44.05, 42.70, 21.38, 18.61; HRMS (ESI) calcd for  $\text{C}_{24}\text{H}_{28}\text{N}_3\text{O}$   $[\text{M}+\text{H}]^+$  374.2227, found 388.2230.

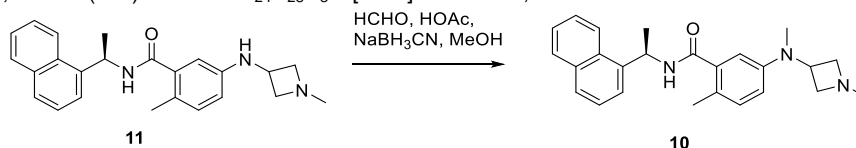

**(R)-2-methyl-5-(methyl(1-methylazetidino-3-yl)amino)-N-(1-(naphthalen-1-yl)ethyl)benzamide (10).** **11** (16 mg, 0.04 mmol) and formaldehyde (37 wt. % in  $\text{H}_2\text{O}$ , 200  $\mu$ L) was subjected to general reductive amination procedure with MeOH (1 mL), HOAc (50  $\mu$ L) at room temperature, and then  $\text{NaBH}_3\text{CN}$  (14 mg, 0.21 mmol) was added. The purification by Prep-HPLC afforded the product **10** (110 mg, yield 95%) as a white solid:  $[\alpha]_{546}^{25} = -80.9$  (c 0.8, MeOH);  $^1\text{H NMR}$  (400 MHz, Methanol- $d_4$ )  $\delta$  8.31 (s, 1H), 8.25 (d,  $J = 8.5$  Hz, 1H),

7.93 – 7.89 (m, 1H), 7.82 (d,  $J = 8.2$  Hz, 1H), 7.64 – 7.46 (m, 4H), 7.14 – 7.10 (m, 1H), 6.80 (dd,  $J = 8.3, 2.7$  Hz, 1H), 6.72 – 6.70 (m, 1H), 6.04 (q,  $J = 6.9$  Hz, 1H), 4.37 – 4.24 (m, 3H), 4.09 – 4.00 (m, 2H), 2.91 (s, 3H), 2.80 (s, 3H), 2.25 (s, 3H), 1.71 (d,  $J = 6.9$  Hz, 3H);  $^{13}\text{C}$  NMR (100 MHz, Methanol- $d_4$ )  $\delta$  171.90, 148.35, 140.26, 138.88, 135.48, 132.64, 132.36, 129.97, 129.04, 128.96, 127.25, 126.75, 126.45, 124.33, 123.86, 120.07, 117.43, 61.16, 50.84, 46.44, 42.60, 37.95, 21.31, 18.70; HRMS (ESI) calcd for  $\text{C}_{25}\text{H}_{30}\text{N}_3\text{O}$   $[\text{M}+\text{H}]^+$  388.2383, found 388.2389.

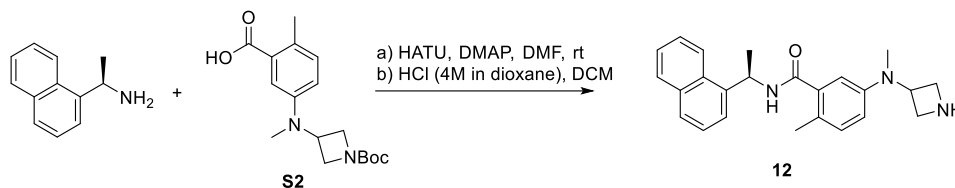

**(R)-5-(azetidin-3-yl(methyl)amino)-2-methyl-N-(1-(naphthalen-1-yl)ethyl)benzamide (12).** (R)-1-(naphthalen-1-yl)ethan-1-amine (100 mg, 0.58 mmol), 5-((1-(tert-butoxycarbonyl)azetidin-3-yl)(methyl)amino)-2-methylbenzoic acid (**S2**) (189 mg, 0.58 mmol), HATU (221 mg, 0.58 mmol) and DMAP (213 mg, 1.74 mmol) was subjected to general amine coupling procedure with DMF (4 mL). After purification by Prep-HPLC, the product was subjected to general N-Boc deprotection procedure with HCl (4M in dioxane, 1.4 mL) and DCM (5 mL). The purification by Prep-HPLC afforded the **12** (150 mg, yield 69% for 2 steps) as a white solid:  $[\alpha]_{\text{D}}^{25} = -78.9$  (c 1.1, MeOH);  $^1\text{H}$  NMR (400 MHz, Methanol- $d_4$ )  $\delta$  8.47 (s, 1H), 8.28 – 8.22 (m, 1H), 7.94 – 7.87 (m, 1H), 7.81 (d,  $J = 8.2$  Hz, 1H), 7.66 – 7.44 (m, 4H), 7.11 (d,  $J = 8.3$  Hz, 1H), 6.80 (dd,  $J = 8.4, 2.7$  Hz, 1H), 6.72 (d,  $J = 2.7$  Hz, 1H), 6.04 (q,  $J = 6.9$  Hz, 1H), 4.53 – 4.41 (m, 1H), 4.23 – 4.14 (m, 2H), 4.09 – 4.00 (m, 2H), 2.82 (s, 3H), 2.24 (s, 3H), 1.71 (d,  $J = 6.9$  Hz, 3H);  $^{13}\text{C}$  NMR (100 MHz, Methanol- $d_4$ )  $\delta$  171.98, 148.37, 140.27, 138.83, 135.48, 132.61, 132.34, 129.96, 129.02, 128.56, 127.24, 126.74, 126.44, 124.31, 123.84, 119.66, 116.96, 53.31, 51.99, 46.45, 37.03, 21.34, 18.68. HRMS (ESI) calcd for  $\text{C}_{24}\text{H}_{28}\text{N}_3\text{O}$   $[\text{M}+\text{H}]^+$  374.2227, found 374.2231.

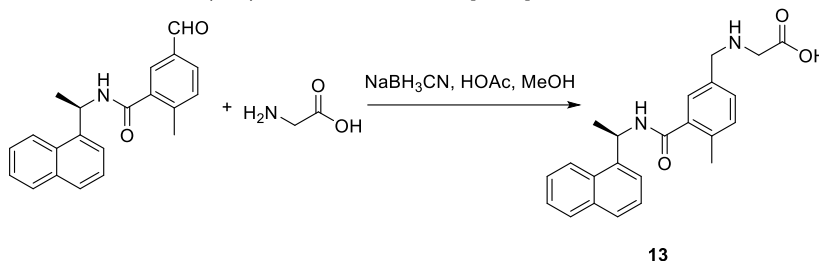

**(R)-4-methyl-3-((1-(naphthalen-1-yl)ethyl)carbamoyl)benzylglycine (13).** (R)-5-formyl-2-methyl-N-(1-(naphthalen-1-yl)ethyl)benzamide (30 mg, 0.10 mmol) and glycine (11 mg, 0.15 mmol) was subjected to general reductive amination procedure with MeOH (1 mL), HOAc (200  $\mu\text{L}$ ) at 50°C, and then  $\text{NaBH}_3\text{CN}$  (19 mg, 0.30 mmol) was added. The purification by Prep-HPLC provided the amination compound **13** (20 mg, yield 53%) as a white solid:  $[\alpha]_{\text{D}}^{25} = -64.4$  (c 0.7, MeOH);  $^1\text{H}$  NMR (400 MHz, Methanol- $d_4$ )  $\delta$  8.27 (d,  $J = 8.5$  Hz, 1H), 7.91 (d,  $J = 8.1$  Hz, 1H), 7.82 (d,  $J = 8.2$  Hz, 1H), 7.66 (d,  $J = 7.3$  Hz, 1H), 7.60 – 7.43 (m, 5H), 7.34 (d,  $J = 8.1$  Hz, 1H), 6.09 (q,  $J = 6.9$  Hz, 1H), 4.24 (s, 2H), 3.89 (s, 2H), 2.38 (s, 3H), 1.73 (d,  $J = 6.9$  Hz, 3H);  $^{13}\text{C}$  NMR (100 MHz, Methanol- $d_4$ )  $\delta$  171.08, 168.15, 140.05, 138.86, 138.59, 135.47, 132.62, 132.43, 132.33, 129.94, 129.68, 129.52, 129.08, 127.34, 126.78, 126.47, 124.23, 123.85, 68.13, 47.53, 46.41, 21.38, 19.46; HRMS (ESI) calcd for  $\text{C}_{23}\text{H}_{25}\text{N}_2\text{O}_3$   $[\text{M}+\text{H}]^+$  377.1860, found 377.1857.

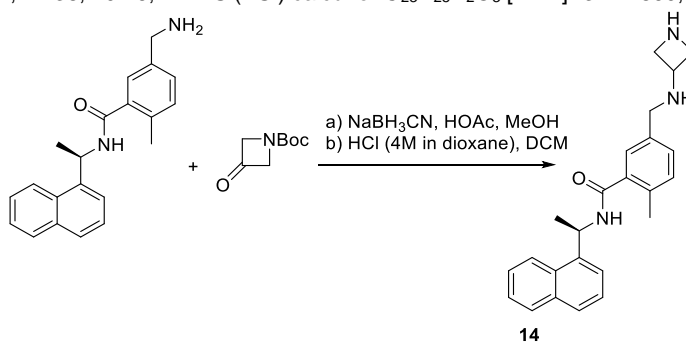

**(R)-5-((azetidin-3-ylamino)methyl)-2-methyl-N-(1-(naphthalen-1-yl)ethyl)benzamide (14).** (R)-5-(aminomethyl)-2-methyl-N-(1-(naphthalen-1-yl)ethyl)benzamide<sup>1</sup> (30 mg, 0.09 mmol) and tert-butyl 3-oxoazetidine-1-carboxylate (31 mg, 0.18 mmol) was subjected to general reductive amination procedure with MeOH (2 mL), HOAc (500  $\mu\text{L}$ ) at 50 °C, and then  $\text{NaBH}_3\text{CN}$  (17 mg, 0.27 mmol) was added. After purification by Prep-HPLC, the product was subjected to general N-Boc deprotection procedure with HCl (4M in dioxane, 100  $\mu\text{L}$ ) and DCM (2 mL). The purification by Prep-HPLC afforded the **14** (26 mg, yield 77% for 2 steps) as a white solid:  $^1\text{H}$  NMR (400 MHz, Methanol- $d_4$ )  $\delta$  8.31 (s, 1H), 8.27 (d,  $J = 8.6$  Hz, 1H), 7.93 – 7.89 (m, 1H), 7.82 (d,  $J = 8.2$  Hz, 1H), 7.64 (d,  $J = 7.1$  Hz, 1H), 7.60 – 7.46 (m, 3H), 7.31 – 7.26 (m, 2H), 7.20 (d,  $J = 7.7$  Hz, 1H), 6.07 (q,  $J = 6.8$  Hz, 1H), 4.05 – 3.98 (m, 2H), 3.86 – 3.73 (m, 3H), 3.71 (s, 2H), 2.33 (s, 3H), 1.71 (d,  $J = 7.0$  Hz, 3H);  $^{13}\text{C}$  NMR (100 MHz, Methanol- $d_4$ )  $\delta$  171.85, 140.23, 138.40, 135.86, 135.49, 132.38, 131.95, 130.78, 129.94, 129.04, 128.01, 127.29, 126.76, 126.45, 124.31, 123.81, 54.80, 51.33, 51.02, 46.33, 21.38, 19.32; HRMS (ESI) calcd for  $\text{C}_{24}\text{H}_{28}\text{N}_3\text{O}$   $[\text{M}+\text{H}]^+$  374.2227, found 374.2231.

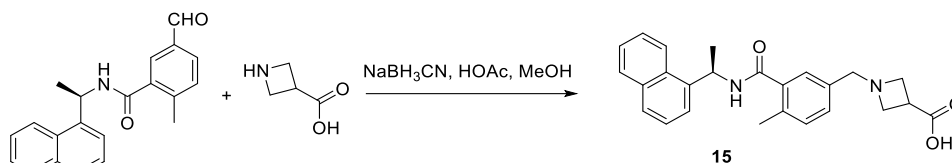

**(R)-1-(4-methyl-3-((1-(naphthalen-1-yl)ethyl)carbamoyl)benzyl)azetidine-3-carboxylic acid (15).** (R)-5-formyl-2-methyl-N-(1-(naphthalen-1-yl)ethyl)benzamide (30 mg, 0.10 mmol) and azetidine-3-carboxylic acid (15 mg, 0.15 mmol) was subjected to general reductive amination procedure with MeOH (1 mL), HOAc (200  $\mu$ L) at 50°C, and then NaBH<sub>3</sub>CN (19 mg, 0.30 mmol) was added. The purification by Prep-HPLC provided the amination compound **15** (18 mg, yield 45%) as a white solid: <sup>1</sup>H NMR (400 MHz, Acetone-*d*<sub>6</sub>)  $\delta$  8.48 (d, *J* = 8.1 Hz, 1H), 8.28 (d, *J* = 8.5 Hz, 1H), 7.94 – 7.87 (m, 1H), 7.78 (d, *J* = 8.1 Hz, 1H), 7.71 – 7.63 (m, 2H), 7.57 – 7.42 (m, 3H), 7.32 (d, *J* = 7.7 Hz, 1H), 7.15 (d, *J* = 7.6 Hz, 1H), 6.05 (p, *J* = 7.0 Hz, 1H), 4.12 (s, 2H), 4.00 – 3.88 (m, 4H), 3.22 – 3.15 (m, 1H), 2.35 (s, 3H), 1.63 (d, *J* = 6.9 Hz, 3H); <sup>13</sup>C NMR (100 MHz, Acetone-*d*<sub>6</sub>)  $\delta$  176.13, 164.02, 141.08, 138.09, 137.92, 134.86, 131.98, 131.78, 131.60, 130.18, 129.62, 128.37, 126.97, 126.44, 126.35, 124.34, 123.52, 67.58, 58.97, 57.17, 45.49, 35.10, 21.78, 19.85; HRMS (ESI) calcd for C<sub>25</sub>H<sub>27</sub>N<sub>2</sub>O<sub>3</sub> [M+H]<sup>+</sup> 403.2016, found 403.2019.

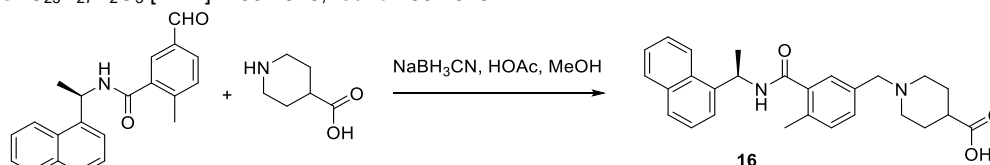

**(R)-1-(4-methyl-3-((1-(naphthalen-1-yl)ethyl)carbamoyl)benzyl)piperidine-4-carboxylic acid (16).** (R)-5-formyl-2-methyl-N-(1-(naphthalen-1-yl)ethyl)benzamide (30 mg, 0.10 mmol) and piperidine-4-carboxylic acid (19 mg, 0.15 mmol) was subjected to general reductive amination procedure with MeOH (1 mL), HOAc (200  $\mu$ L) at 50°C, and then NaBH<sub>3</sub>CN (19 mg, 0.30 mmol) was added. The purification by Prep-HPLC provided the amination compound **16** (19 mg, yield 44%) as a white solid: <sup>1</sup>H NMR (400 MHz, Acetone-*d*<sub>6</sub>)  $\delta$  8.33 (d, *J* = 8.5 Hz, 1H), 8.00 (d, *J* = 8.1 Hz, 1H), 7.93 (dd, *J* = 8.2, 1.5 Hz, 1H), 7.83 (d, *J* = 8.2 Hz, 1H), 7.71 (d, *J* = 7.1 Hz, 1H), 7.63 – 7.57 (m, 1H), 7.55 – 7.44 (m, 3H), 7.28 (dd, *J* = 7.8, 1.8 Hz, 1H), 7.16 (d, *J* = 7.7 Hz, 1H), 6.11 (p, *J* = 7.2 Hz, 1H), 2.90 (d, *J* = 11.2 Hz, 2H), 2.37 (s, 3H), 2.34 – 2.18 (m, 3H), 2.07 – 2.07 (m, 2H), 1.92 – 1.84 (m, 2H), 1.79 – 1.67 (m, 5H); <sup>13</sup>C NMR (100 MHz, Acetone-*d*<sub>6</sub>)  $\delta$  176.16, 163.15, 140.80, 138.02, 137.99, 136.02, 134.92, 132.10, 131.34, 131.16, 129.61, 128.94, 128.48, 126.99, 126.48, 126.29, 124.40, 123.61, 62.35, 53.03, 45.43, 45.33, 40.81, 28.43, 21.57, 19.63; HRMS (ESI) calcd for C<sub>27</sub>H<sub>31</sub>N<sub>2</sub>O<sub>3</sub> [M+H]<sup>+</sup> 431.2329, found 431.2333.

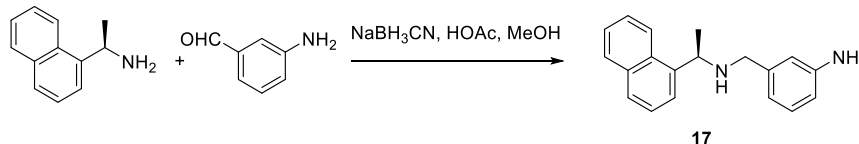

**(R)-3-(((1-(naphthalen-1-yl)ethyl)amino)methyl)aniline (17).** (R)-1-(naphthalen-1-yl)ethan-1-amine (172 mg, 1.00 mmol) and 3-aminobenzaldehyde (61 mg, 0.50 mmol) was subjected to general reductive amination procedure with MeOH (5 mL), HOAc (500  $\mu$ L) at 50°C, and then NaBH<sub>3</sub>CN (189 mg, 3.00 mmol) was added. The purification by Prep-HPLC provided the amination compound **17** (134 mg, yield 48%) as a white solid: <sup>1</sup>H NMR (400 MHz, Methanol-*d*<sub>4</sub>)  $\delta$  8.40 – 8.31 (m, 2H), 8.14 – 8.06 (m, 1H), 8.04 – 7.95 (m, 2H), 7.83 – 7.77 (m, 1H), 7.68 – 7.57 (m, 3H), 6.93 (d, *J* = 7.9 Hz, 1H), 6.74 – 6.63 (m, 2H), 5.44 (q, *J* = 6.8 Hz, 1H), 3.98 (dd, *J* = 91.8, 13.1 Hz, 2H), 1.83 (d, *J* = 6.7 Hz, 3H); <sup>13</sup>C NMR (100 MHz, Methanol-*d*<sub>4</sub>)  $\delta$  147.53, 135.57, 134.31, 132.86, 132.38, 131.22, 131.11, 130.42, 128.56, 127.60, 127.33, 126.63, 125.07, 122.97, 118.09, 118.00, 53.94, 20.21, 17.95; HRMS (ESI) calcd for C<sub>19</sub>H<sub>21</sub>N<sub>2</sub> [M+H]<sup>+</sup> 277.1699, found 277.1709.

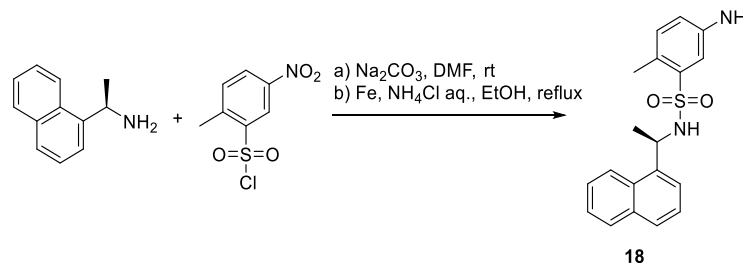

**(R)-5-amino-2-methyl-N-(1-(naphthalen-1-yl)ethyl)benzenesulfonamide (18).** To a solution of (R)-1-(naphthalen-1-yl)ethan-1-amine (86 mg, 0.50 mmol) and 2-methyl-5-nitrobenzenesulfonyl chloride (141 mg, 0.60 mmol) in DMF (5 mL), Na<sub>2</sub>CO<sub>3</sub> (159 mg, 1.5 mmol) was added. The reaction was stirred at room temperature overnight and then was diluted with ethyl acetate, washed with saturated aq. NaHCO<sub>3</sub>, water, and brine, respectively. The organic layer was dried over Na<sub>2</sub>SO<sub>4</sub>, filtered, and concentrated. After purification by silica gel column chromatography, the product was applied to the general Aryl Nitro reduction procedure with ethanol/saturated aq. NH<sub>4</sub>Cl (10 mL/2 mL) and Iron Powder (140 mg, 2.50 mmol). The purification by Prep-HPLC afforded the desired product **18** (124 mg, yield 73%) as a light yellow solid: <sup>1</sup>H NMR (400 MHz, DMSO-*d*<sub>6</sub>)  $\delta$  8.14 (d, *J* = 8.2 Hz, 1H), 7.99 – 7.88 (m, 2H), 7.79 (d, *J* = 8.1 Hz, 1H), 7.63 – 7.59 (m, 1H), 7.53 – 7.43 (m, 3H), 7.15 (d, *J* = 2.5 Hz, 1H), 6.92 (dd, *J* = 8.1, 0.8 Hz, 1H), 6.61 (dd, *J* = 8.0, 2.5 Hz, 1H), 5.05 (p, *J* = 7.0 Hz, 1H), 2.35 (s, 3H), 1.35 (d, *J* = 6.9 Hz, 3H); <sup>13</sup>C NMR (100 MHz, DMSO-*d*<sub>6</sub>)  $\delta$  146.75, 139.46, 139.16,

133.19, 132.75, 129.56, 128.62, 127.30, 126.09, 125.43, 125.30, 123.36, 122.59, 122.10, 117.25, 113.96, 48.54, 22.73, 18.75; HRMS (ESI) calcd for  $C_{19}H_{21}N_2O_2S$   $[M+H]^+$  341.1318, found 341.1311.

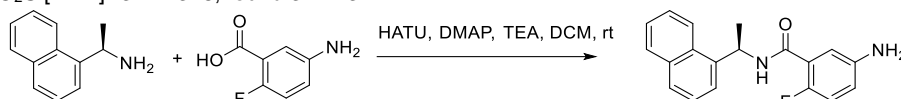

19

**(R)-5-amino-2-fluoro-N-(1-(naphthalen-1-yl)ethyl)benzamide (19).** (R)-1-(naphthalen-1-yl)ethan-1-amine (221 mg, 1.29 mmol), 5-amino-2-fluorobenzoic acid (100 mg, 0.64 mmol), HATU (269 mg, 0.71 mmol), TEA (200  $\mu$ L), and DMAP (8 mg, 0.06 mmol) was subjected to general amine coupling procedure with DCM (4 mL). The purification by Prep-HPLC afforded the product **19** (167 mg, 85%) as a white solid:  $[\alpha]_{546}^{25} = -72.2$  (c 13.3, MeOH);  $^1H$  NMR (400 MHz, Methanol- $d_4$ )  $\delta$  8.19 – 8.15 (m, 1H), 7.82 (dd,  $J = 8.2, 1.5$  Hz, 1H), 7.73 (d,  $J = 8.2$  Hz, 1H), 7.60 (d,  $J = 7.1$  Hz, 1H), 7.53 – 7.38 (m, 3H), 7.00 (dd,  $J = 6.0, 2.9$  Hz, 1H), 6.89 – 6.83 (m, 1H), 6.76 – 6.71 (m, 1H), 6.03 (q,  $J = 6.8$  Hz, 1H), 1.63 (d,  $J = 6.9$  Hz, 3H);  $^{13}C$  NMR (100 MHz, Methanol- $d_4$ )  $\delta$  166.07, 154.04 (d,  $J = 237.9$  Hz), 145.48, 140.27, 135.21, 132.01, 129.81, 128.83, 127.20, 126.61, 126.41, 124.21 (d,  $J = 14.8$  Hz), 124.06, 123.49, 119.76 (d,  $J = 8.0$  Hz), 117.36 (d,  $J = 24.2$  Hz), 116.43, 46.71, 21.70; HRMS (ESI) calcd for  $C_{19}H_{18}FN_2O$   $[M+H]^+$  309.1398, found 309.1404.

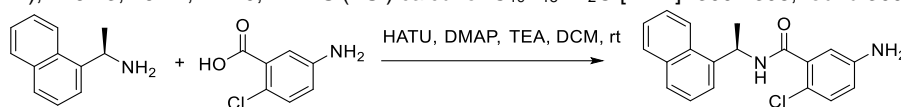

20

**(R)-5-amino-2-chloro-N-(1-(naphthalen-1-yl)ethyl)benzamide (20).** (R)-1-(naphthalen-1-yl)ethan-1-amine (200 mg, 1.16 mmol), 5-amino-2-chlorobenzoic acid (100 mg, 0.58 mmol), HATU (243 mg, 0.64 mmol), TEA (200  $\mu$ L), and DMAP (8 mg, 0.06 mmol) was subjected to general amine coupling procedure with DCM (4 mL). The purification by Prep-HPLC afforded the product **20** (147 mg, 78%) as a white solid:  $[\alpha]_{546}^{25} = -75.6$  (c 12.8, MeOH);  $^1H$  NMR (400 MHz, Methanol- $d_4$ )  $\delta$  8.22 (d,  $J = 8.5$  Hz, 1H), 7.88 (dd,  $J = 8.1, 1.5$  Hz, 1H), 7.79 (d,  $J = 8.2$  Hz, 1H), 7.64 (d,  $J = 7.2$  Hz, 1H), 7.60 – 7.42 (m, 3H), 7.11 (dd,  $J = 8.0, 1.0$  Hz, 1H), 6.72 (d,  $J = 8.0$  Hz, 2H), 6.01 (q,  $J = 6.9$  Hz, 1H), 1.68 (d,  $J = 6.9$  Hz, 3H);  $^{13}C$  NMR (100 MHz, Methanol- $d_4$ )  $\delta$  169.43, 147.36, 140.07, 137.96, 135.39, 132.28, 131.34, 129.83, 128.92, 127.24, 126.66, 126.39, 124.32, 123.77, 119.88, 118.69, 116.13, 46.58, 21.41; HRMS (ESI) calcd for  $C_{19}H_{18}ClN_2O$   $[M+H]^+$  325.1102, found 325.1101.

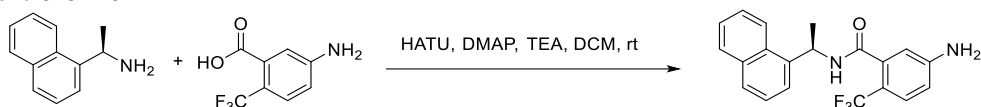

21

**(R)-5-amino-N-(1-(naphthalen-1-yl)ethyl)-2-(trifluoromethyl)benzamide (21).** (R)-1-(naphthalen-1-yl)ethan-1-amine (200 mg, 1.16 mmol), 5-amino-2-(trifluoromethyl)benzoic acid (119 mg, 0.58 mmol), HATU (243 mg, 0.64 mmol), TEA (200  $\mu$ L), and DMAP (8 mg, 0.06 mmol) was subjected to general amine coupling procedure with DCM (4 mL). The purification by Prep-HPLC afforded the product **21** (154 mg, 74%) as a white solid:  $[\alpha]_{546}^{25} = -66.2$  (c 3.4, MeOH);  $^1H$  NMR (400 MHz, Methanol- $d_4$ )  $\delta$  8.25 – 8.19 (m, 1H), 7.88 (dd,  $J = 8.2, 1.4$  Hz, 1H), 7.79 (d,  $J = 8.2$  Hz, 1H), 7.64 – 7.61 (m, 1H), 7.59 – 7.54 (m, 1H), 7.52 – 7.44 (m, 2H), 7.37 (d,  $J = 8.6$  Hz, 1H), 6.70 (dd,  $J = 8.8, 2.4$  Hz, 1H), 6.64 – 6.62 (m, 1H), 6.02 (q,  $J = 6.9$  Hz, 1H), 1.66 (d,  $J = 6.9$  Hz, 3H);  $^{13}C$  NMR (100 MHz, Methanol- $d_4$ )  $\delta$  170.40, 152.88, 140.00, 138.39, 135.38, 132.32, 129.82, 128.92, 128.70 (q,  $J = 4.8$  Hz), 127.29, 126.67, 126.39, 126.10 (q,  $J = 270.7$  Hz), 124.23, 123.74, 114.94, 114.17, 46.39, 21.22; HRMS (ESI) calcd for  $C_{20}H_{18}F_3N_2O$   $[M+H]^+$  359.1366, found 359.1371.

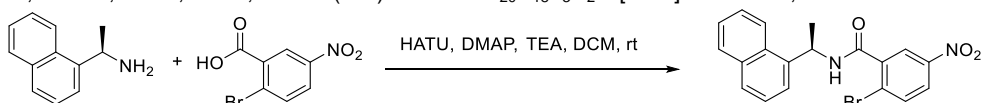

S5

**(R)-2-bromo-N-(1-(naphthalen-1-yl)ethyl)-5-nitrobenzamide.** (R)-1-(naphthalen-1-yl)ethan-1-amine (200 mg, 1.16 mmol), 2-bromo-5-nitrobenzoic acid (285 mg, 1.16 mmol), HATU (456 mg, 1.20 mmol), TEA (500  $\mu$ L), and DMAP (13 mg, 0.1 mmol) was subjected to general amine coupling procedure with DCM (10 mL). The purification by silica gel column chromatography (Hexenes/EtOAc, 3:1) provided the amination compound (431 mg, yield 93%) as a white solid:  $^1H$  NMR (400 MHz, Chloroform- $d$ )  $\delta$  8.31 (d,  $J = 2.7$  Hz, 1H), 8.22 (d,  $J = 8.5$  Hz, 1H), 8.07 (dd,  $J = 8.7, 2.7$  Hz, 1H), 7.91 – 7.88 (m, 1H), 7.84 (d,  $J = 8.2$  Hz, 1H), 7.75 (d,  $J = 8.7$  Hz, 1H), 7.64 – 7.46 (m, 5H), 6.22 – 6.11 (m, 1H), 1.86 (d,  $J = 6.4$  Hz, 3H); LRMS (ESI) calcd for  $C_{20}H_{16}BrN_2O_3$   $[M+H]^+$  399.0, found 399.1.

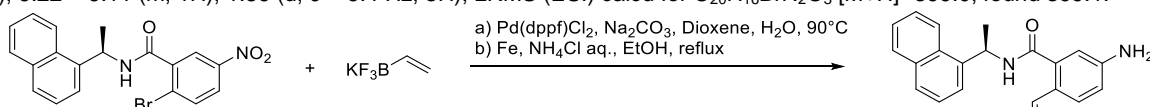

S5

22

**(R)-5-amino-N-(1-(naphthalen-1-yl)ethyl)-2-vinylbenzamide (22).** A flask fitted with a rubber septum was charged with (R)-2-bromo-N-(1-(naphthalen-1-yl)ethyl)-5-nitrobenzamide (100 mg, 0.25 mmol), Potassium vinyltrifluoroborate (67 mg, 0.50 mmol), Pd(dppf)Cl<sub>2</sub> (25 mg, 0.03 mmol), Na<sub>2</sub>CO<sub>3</sub> (63 mg, 0.75 mmol), Dioxene/H<sub>2</sub>O (4 mL/0.4 mL) and then purged with argon. The mixture was stirred at 90 °C overnight. The reaction mixture was then cooled to room temperature, diluted with ethyl acetate (50 mL), filtered through celite and concentrated in vacuo. After purification by Prep-HPLC, the product was applied to the general Aryl Nitro reduction procedure with

ethanol/ saturated aq.  $\text{NH}_4\text{Cl}$  (4 mL/1 mL) and Iron Powder (42 mg, 0.75 mmol). The purification by Prep-HPLC afforded the desired product **22** (53 mg, yield 67%) as a light brown solid:  $[\alpha]_{546}^{25} = -69.8$  (c 0.2, MeOH);  $^1\text{H NMR}$  (400 MHz, Methanol- $d_4$ )  $\delta$  8.25 (d,  $J = 8.5$  Hz, 1H), 7.93 – 7.87 (m, 1H), 7.81 (d,  $J = 8.2$  Hz, 1H), 7.64 – 7.44 (m, 4H), 7.40 (d,  $J = 8.4$  Hz, 1H), 6.80 – 6.70 (m, 2H), 6.64 – 6.62 (m, 1H), 6.03 (q,  $J = 6.9$  Hz, 1H), 5.50 (dd,  $J = 17.5$ , 1.3 Hz, 1H), 4.96 (dd,  $J = 11.1$ , 1.3 Hz, 1H), 1.68 (d,  $J = 7.0$  Hz, 3H);  $^{13}\text{C NMR}$  (100 MHz, Methanol- $d_4$ )  $\delta$  172.09, 148.86, 140.39, 138.15, 135.46, 135.07, 132.34, 129.88, 128.93, 127.39, 127.27, 126.70, 126.41, 125.93, 124.30, 123.73, 117.56, 114.00, 111.86, 46.39, 21.43; HRMS (ESI) calcd for  $\text{C}_{21}\text{H}_{21}\text{N}_2\text{O}$   $[\text{M}+\text{H}]^+$  317.1648, found 317.2231.

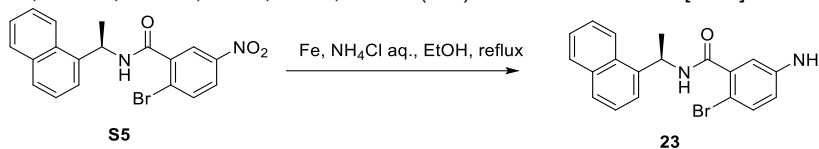

**(R)-5-amino-2-bromo-N-(1-(naphthalen-1-yl)ethyl)benzamide (23)**. (R)-2-bromo-N-(1-(naphthalen-1-yl)ethyl)-5-nitrobenzamide (100 mg, 0.25 mmol) was applied to the general Aryl Nitro reduction procedure with ethanol/ saturated aq.  $\text{NH}_4\text{Cl}$  (4 mL/1 mL) and Iron Powder (42 mg, 0.75 mmol). The purification by Prep-HPLC afforded the desired product **23** (84 mg, yield 91%) as a light brown solid: Light yellow solid (yield 82%):  $^1\text{H NMR}$  (400 MHz, Methanol- $d_4$ )  $\delta$  8.24 (d,  $J = 8.5$  Hz, 1H), 7.93 – 7.86 (m, 1H), 7.80 (d,  $J = 8.2$  Hz, 1H), 7.65 (d,  $J = 7.2$  Hz, 1H), 7.59 – 7.44 (m, 3H), 7.24 (d,  $J = 8.6$  Hz, 1H), 6.67 (d,  $J = 2.8$  Hz, 1H), 6.62 (dd,  $J = 8.5$ , 2.8 Hz, 1H), 6.01 (q,  $J = 6.9$  Hz, 1H), 1.69 (d,  $J = 6.9$  Hz, 3H); LRMS (ESI) calcd for  $\text{C}_{19}\text{H}_{18}\text{BrN}_2\text{O}$   $[\text{M}+\text{H}]^+$  369.1, found 369.0.

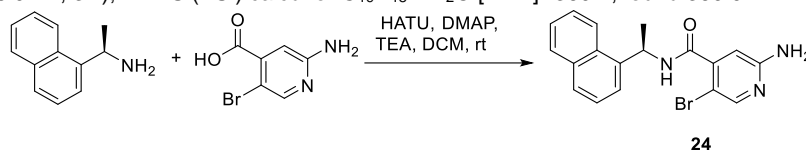

**(R)-2-amino-5-bromo-N-(1-(naphthalen-1-yl)ethyl)isonicotinamide (24)**. (R)-1-(naphthalen-1-yl)ethan-1-amine (41 mg, 0.24 mmol), 2-amino-5-bromoisonicotinic acid (25 mg, 0.12 mmol), HATU (46 mg, 0.12 mmol), TEA (100  $\mu\text{L}$ ), and DMAP (3 mg, 0.02 mmol) was subjected to general amine coupling procedure with DCM (2 mL). The purification by Prep-HPLC afforded the product **24** (31 mg, yield 71%) as a brown solid:  $[\alpha]_{546}^{25} = -37.4$  (c 0.5, MeOH);  $^1\text{H NMR}$  (400 MHz, Methanol- $d_4$ )  $\delta$  8.22 (d,  $J = 8.7$  Hz, 1H), 8.00 (s, 1H), 7.91 – 7.88 (m, 1H), 7.81 (d,  $J = 8.3$  Hz, 1H), 7.64 (d,  $J = 7.1$  Hz, 1H), 7.60 – 7.45 (m, 3H), 6.52 (s, 1H), 6.01 (q,  $J = 6.9$  Hz, 1H), 1.70 (d,  $J = 7.0$  Hz, 3H);  $^{13}\text{C NMR}$  (100 MHz, Methanol- $d_4$ )  $\delta$  168.04, 160.22, 150.46, 148.32, 139.70, 135.44, 132.31, 129.88, 129.11, 127.37, 126.76, 126.39, 124.31, 123.89, 109.01, 103.71, 46.50, 21.28; HRMS (ESI) calcd for  $\text{C}_{18}\text{H}_{17}\text{BrN}_3\text{O}$   $[\text{M}+\text{H}]^+$  370.0550, found 370.0556.

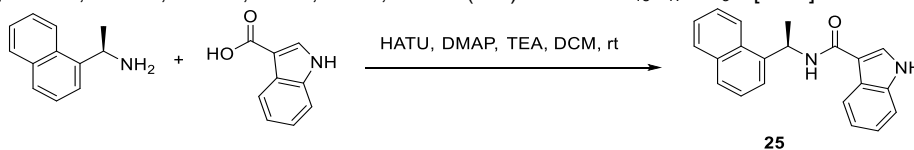

**(R)-N-(1-(naphthalen-1-yl)ethyl)-1H-indole-3-carboxamide (25)**. (R)-1-(naphthalen-1-yl)ethan-1-amine (233 mg, 1.36 mmol), 1H-indole-3-carboxylic acid (200 mg, 1.24 mmol), HATU (708 mg, 1.86 mmol) and DIPEA (0.6 mL, 3.72 mmol) was subjected to general amine coupling procedure with DMF (5 mL). The purification by Prep-HPLC afforded the product **25** (334 mg, yield 86%) as a white solid:  $[\alpha]_{546}^{25} = -14.8$  (c 0.5, MeOH);  $^1\text{H NMR}$  (400 MHz, Chloroform- $d$ )  $\delta$  9.06 (s, 1H), 8.25 (d,  $J = 8.4$  Hz, 1H), 7.90 – 7.84 (m, 2H), 7.80 (d,  $J = 8.2$  Hz, 1H), 7.69 (d,  $J = 2.9$  Hz, 1H), 7.63 (d,  $J = 6.4$  Hz, 1H), 7.55 – 7.44 (m, 3H), 7.39 (dd,  $J = 6.8$ , 1.6 Hz, 1H), 7.20 (pd,  $J = 7.1$ , 1.4 Hz, 2H), 6.23 – 6.16 (m, 1H), 1.81 (d,  $J = 6.5$  Hz, 2H);  $^{13}\text{C NMR}$  (100 MHz, Chloroform- $d$ )  $\delta$  164.35, 138.82, 136.40, 134.00, 131.21, 128.72, 128.29, 127.92, 126.56, 125.83, 125.25, 124.75, 123.64, 122.78, 122.59, 121.49, 119.94, 111.93, 44.75, 21.22; HRMS (ESI) calcd for  $\text{C}_{21}\text{H}_{19}\text{N}_2\text{O}$   $[\text{M}+\text{H}]^+$  315.1492, found 315.1498.

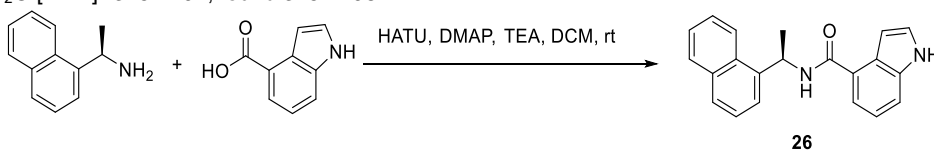

**(R)-N-(1-(naphthalen-1-yl)ethyl)-1H-indole-4-carboxamide (26)**. (R)-1-(naphthalen-1-yl)ethan-1-amine (94 mg, 0.55 mmol), 1H-indole-4-carboxylic acid (80 mg, 0.50 mmol), HATU (283 mg, 0.74 mmol) and DIPEA (0.26 mL, 1.5 mmol) was subjected to general amine coupling procedure with DMF (5 mL). The purification by Prep-HPLC afforded the **26** (117 mg, yield 75%) as a white solid:  $^1\text{H NMR}$  (400 MHz, DMSO- $d_6$ )  $\delta$  11.24 (s, 1H), 8.76 (d,  $J = 7.9$  Hz, 1H), 8.29 (d,  $J = 8.4$  Hz, 1H), 7.95 (dd,  $J = 8.0$ , 1.6 Hz, 1H), 7.83 (d,  $J = 8.1$  Hz, 1H), 7.69 (d,  $J = 6.7$  Hz, 1H), 7.59 (ddd,  $J = 8.5$ , 6.8, 1.6 Hz, 1H), 7.56 – 7.47 (m, 4H), 7.39 (t,  $J = 2.8$  Hz, 1H), 7.16 – 7.11 (m, 1H), 6.80 – 6.69 (m, 1H), 6.03 (p,  $J = 7.1$  Hz, 1H), 1.63 (d,  $J = 6.9$  Hz, 3H);  $^{13}\text{C NMR}$  (100 MHz, DMSO- $d_6$ )  $\delta$  167.02, 140.83, 136.46, 133.36, 130.45, 128.61, 127.06, 126.66, 126.31, 126.06, 126.00, 125.49, 123.25, 122.55, 120.02, 118.53, 114.02, 101.74, 44.43, 39.52, 21.61; HRMS (ESI) calcd for  $\text{C}_{21}\text{H}_{19}\text{N}_2\text{O}$   $[\text{M}+\text{H}]^+$  315.1492, found 315.1491.

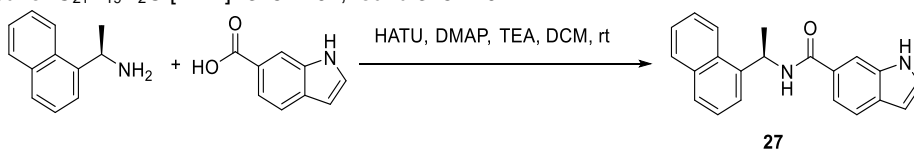

**(R)-N-(1-(naphthalen-1-yl)ethyl)-1H-indole-6-carboxamide (27)**. (R)-1-(naphthalen-1-yl)ethan-1-amine (58 mg, 0.34 mmol), 1H-indole-6-carboxylic acid (50 mg, 0.31 mmol), HATU (171 mg, 0.46 mmol) and DIPEA (0.15 mL, 0.93 mmol) was subjected to general

amine coupling procedure with DMF (5 mL). The purification by Prep-HPLC afforded the **27** (69 mg, yield 71%) as a white solid:  $[\alpha]_{546}^{25} = -5.0$  (c 2.5, MeOH);  $^1\text{H NMR}$  (400 MHz, DMSO- $d_6$ )  $\delta$  11.34 (s, 1H), 8.86 (d,  $J = 7.8$  Hz, 1H), 8.25 (d,  $J = 8.4$  Hz, 1H), 8.00 (s, 1H), 7.99 – 7.92 (m, 1H), 6.49 (td,  $J = 2.0, 0.9$  Hz, 1H), 6.01 (p,  $J = 7.1$  Hz, 1H), 1.64 (d,  $J = 6.9$  Hz, 3H);  $^{13}\text{C NMR}$  (100 MHz, DMSO- $d_6$ )  $\delta$  166.92, 141.31, 135.66, 133.84, 130.95, 130.25, 129.09, 128.39, 127.82, 127.56, 126.57, 125.98, 125.93, 123.69, 123.04, 119.75, 118.69, 111.88, 101.66, 45.12, 22.06; HRMS (ESI) calcd for  $\text{C}_{21}\text{H}_{19}\text{N}_2\text{O}$   $[\text{M}+\text{H}]^+$  315.1492, found 315.1498.

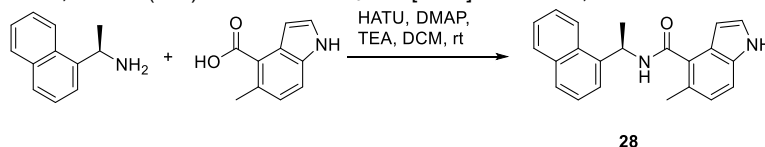

**(R)-5-methyl-N-(1-(naphthalen-1-yl)ethyl)-1H-indole-4-carboxamide (28)**. (R)-1-(naphthalen-1-yl)ethan-1-amine (150 mg, 0.88 mmol), 5-methyl-1H-indole-4-carboxylic acid (128 mg, 0.73 mmol), HATU (333 mg, 0.88 mmol), and TEA (400  $\mu\text{L}$ ) was subjected to general amine coupling procedure with DMF (5 mL). The purification by Prep-HPLC afforded the **28** (209 mg, yield 87%) as a brown solid:  $^1\text{H NMR}$  (400 MHz, Methanol- $d_4$ )  $\delta$  7.91 (d,  $J = 8.1$  Hz, 1H), 7.82 (d,  $J = 8.2$  Hz, 1H), 7.66 (d,  $J = 7.1$  Hz, 1H), 7.60 (ddd,  $J = 8.4, 6.9, 1.3$  Hz, 1H), 7.56 – 7.45 (m, 2H), 7.30 (d,  $J = 8.3$  Hz, 1H), 7.16 (d,  $J = 3.2$  Hz, 1H), 6.96 (d,  $J = 8.3$  Hz, 1H), 6.28 – 6.24 (m, 1H), 6.20 (q,  $J = 6.9$  Hz, 1H), 2.38 (s, 3H), 1.76 (d,  $J = 6.9$  Hz, 3H).  $^{13}\text{C NMR}$  (100 MHz, Methanol- $d_4$ )  $\delta$  140.30, 135.47, 132.46, 129.87, 128.97, 127.25, 126.73, 126.40, 125.99, 124.79, 124.60, 123.97, 113.18, 100.86, 49.00, 46.16, 21.46, 19.13; HRMS (ESI) calcd for  $\text{C}_{22}\text{H}_{22}\text{N}_2\text{O}$   $[\text{M}+\text{H}]^+$  329.1648, found 329.1649.

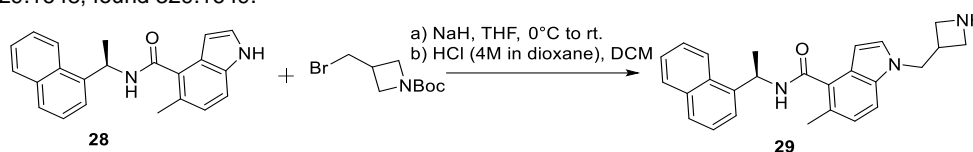

**(R)-1-(azetidin-3-ylmethyl)-5-methyl-N-(1-(naphthalen-1-yl)ethyl)-1H-indole-4-carboxamide (29)**. To a solution of **28** (40 mg, 0.12 mmol) in dry THF (5 mL), sodium hydride (12 mg, 0.25 mmol) was added at 0 °C. After 15 minutes, the mixture was added tert-butyl 3-(bromomethyl)azetidine-1-carboxylate (30 mg, 0.16 mmol) and stirred at 25 °C for another 16 hours. Quench the reaction with methanol and remove the solvent. The residue was purified by preparative HPLC system to obtain the desired product.

The product from previous step was subjected to general N-Boc deprotection procedure with HCl (4M in dioxane, 200  $\mu\text{L}$ ) and DCM (4 mL). The purification by Prep-HPLC afforded the product **29** (39 mg, yield 82% for 2 steps) as a white solid:  $[\alpha]_{546}^{25} = -63.9$  (c 1.1, MeOH);  $^1\text{H NMR}$  (400 MHz, Methanol- $d_4$ )  $\delta$  8.53 (s, 1H), 7.33 (d,  $J = 8.1$  Hz, 1H), 7.25 (d,  $J = 3.2$  Hz, 1H), 7.18 – 7.07 (m, 3H), 6.79 (dd,  $J = 8.3, 2.7$  Hz, 1H), 6.73 (d,  $J = 2.6$  Hz, 1H), 6.66 (d,  $J = 3.7$  Hz, 1H), 5.62 (q,  $J = 7.0$  Hz, 1H), 4.46 (p,  $J = 7.2$  Hz, 1H), 4.19 (dd,  $J = 12.3, 7.4$  Hz, 4H), 4.05 (dd,  $J = 10.3, 7.4$  Hz, 2H), 2.83 (s, 3H), 2.23 (s, 3H), 2.06 – 1.96 (m, 2H), 1.93 – 1.79 (m, 4H), 1.65 (d,  $J = 7.0$  Hz, 3H).  $^{13}\text{C NMR}$  (100 MHz, Methanol- $d_4$ )  $\delta$  148.36, 139.08, 137.99, 136.30, 132.56, 129.04, 128.62, 127.88, 122.25, 119.64, 117.05, 116.55, 111.39, 109.89, 99.99, 53.41, 52.28, 52.02, 49.00, 37.58, 37.12, 27.10, 21.24, 18.98, 18.65; HRMS (ESI) calcd for  $\text{C}_{26}\text{H}_{28}\text{N}_3\text{O}$   $[\text{M}+\text{H}]^+$  398.2227, found 398.2230.

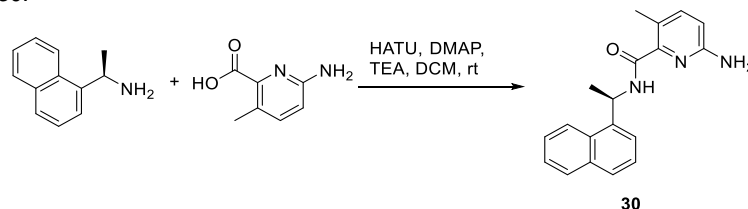

**(R)-6-amino-3-methyl-N-(1-(naphthalen-1-yl)ethyl)picolinamide (30)**. (R)-1-(naphthalen-1-yl)ethan-1-amine (55 mg, 0.32 mmol), 6-amino-3-methylpicolinic acid (25 mg, 0.16 mmol), HATU (61 mg, 0.16 mmol), TEA (100  $\mu\text{L}$ ), and DMAP (3 mg, 0.02 mmol) was subjected to general amine coupling procedure with DCM (2 mL). The purification by Prep-HPLC afforded the product **30** (43 mg, yield 87%) as a brown solid:  $[\alpha]_{546}^{25} = -116.1$  (c 0.6, MeOH);  $^1\text{H NMR}$  (400 MHz, Methanol- $d_4$ )  $\delta$  8.21 – 8.16 (m, 1H), 7.89 – 7.86 (m, 1H), 7.80 – 7.77 (m, 1H), 7.65 – 7.62 (m, 1H), 7.56 – 7.43 (m, 4H), 7.31 (d,  $J = 8.4$  Hz, 1H), 6.60 (d,  $J = 8.3$  Hz, 1H), 5.97 (q,  $J = 6.9$  Hz, 1H), 2.39 (s, 3H), 1.70 (d,  $J = 6.9$  Hz, 3H);  $^{13}\text{C NMR}$  (100 MHz, Methanol- $d_4$ )  $\delta$  168.28, 162.59, 158.18, 146.77, 143.24, 140.42, 135.45, 132.25, 129.86, 128.93, 127.25, 126.68, 126.45, 124.20, 123.54, 112.72, 46.02, 21.73, 18.70; HRMS (ESI) calcd for  $\text{C}_{19}\text{H}_{20}\text{N}_3\text{O}$   $[\text{M}+\text{H}]^+$  306.1601, found 306.1602.

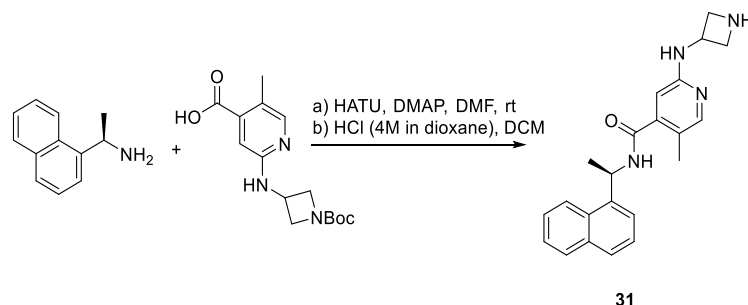

**(R)-2-(azetidin-3-ylamino)-5-methyl-N-(1-(naphthalen-1-yl)ethyl)isonicotinamide (31)**. (R)-1-(naphthalen-1-yl)ethan-1-amine (35 mg, 0.20 mmol), 2-((1-(tert-butoxycarbonyl)azetidin-3-yl)amino)-5-methylisonicotinic acid (30 mg, 0.10 mmol), HATU (46 mg, 0.12

mmol) and DMAP (37 mg, 0.30 mmol) was subjected to general amine coupling procedure with DMF (1.5 mL). After purification by Prep-HPLC, the product was subjected to general N-Boc deprotection procedure with HCl (4M in dioxane, 100  $\mu$ L) and DCM (2 mL). The purification by Prep-HPLC afforded the product **31** (31 mg, yield 86% for 2 steps) as a white solid:  $[\alpha]_{546}^{25} = -88.9$  (c 1.0, MeOH);  $^1\text{H}$  NMR (400 MHz, Methanol- $d_4$ )  $\delta$  8.45 (s, 1H), 8.24 – 8.17 (m, 1H), 7.99 – 7.79 (m, 3H), 7.66 – 7.46 (m, 4H), 6.95 (d,  $J = 5.8$  Hz, 1H), 6.06 – 5.99 (m, 1H), 4.82 – 4.47 (m, 3H), 4.36 – 4.05 (m, 1H), 3.24 – 3.12 (m, 1H), 2.23 – 2.15 (m, 3H), 1.77 – 1.72 (m, 3H);  $^{13}\text{C}$  NMR (100 MHz, Methanol- $d_4$ )  $\delta$  169.57, 166.46, 155.84, 154.27, 149.40, 139.32, 137.43, 135.49, 132.26, 130.04, 129.38, 127.47, 126.89, 126.43, 124.03, 123.93, 108.11, 55.83, 55.40, 54.39, 46.47, 21.02, 15.45; HRMS (ESI) calcd for  $\text{C}_{22}\text{H}_{25}\text{N}_4\text{O}$   $[\text{M}+\text{H}]^+$  361.2023, found 361.2024.

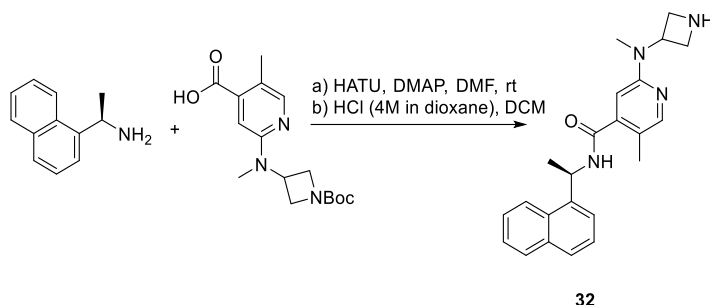

**(R)-2-(azetidin-3-yl(methyl)amino)-5-methyl-N-(1-(naphthalen-1-yl)ethyl)isonicotinamide (32)**. (R)-1-(naphthalen-1-yl)ethan-1-amine (42 mg, 0.24 mmol), 2-((1-(tert-butoxycarbonyl)azetidin-3-yl)(methyl)amino)-5-methylisonicotinic acid (50 mg, 0.16 mmol), HATU (73 mg, 0.19 mmol) and DMAP (39 mg, 0.32 mmol) was subjected to general amine coupling procedure with DMF (1 mL). After purification by Prep-HPLC, the product was subjected to general N-Boc deprotection procedure with HCl (4M in dioxane, 200  $\mu$ L) and DCM (4 mL). The purification by Prep-HPLC afforded the product **32** (44 mg, yield 73% for 2 steps) as a white solid:  $[\alpha]_{546}^{25} = -109.3$  (c 0.2, MeOH);  $^1\text{H}$  NMR (400 MHz, Methanol- $d_4$ )  $\delta$  8.42 (s, 1H), 8.22 (d,  $J = 8.5$  Hz, 1H), 7.98 (s, 1H), 7.92 (d,  $J = 8.1$  Hz, 1H), 7.85 (d,  $J = 8.2$  Hz, 1H), 7.68 – 7.63 (m, 1H), 7.62 – 7.48 (m, 3H), 7.05 (d,  $J = 4.7$  Hz, 1H), 6.06 (q,  $J = 6.9$  Hz, 1H), 4.82 – 4.75 (m, 1H), 4.63 – 4.54 (m, 1H), 4.32 (d,  $J = 6.1$  Hz, 1H), 3.23 – 3.15 (m, 1H), 3.13 (s, 3H), 3.08 – 3.02 (m, 1H), 2.17 (d,  $J = 4.8$  Hz, 3H), 1.76 (d,  $J = 6.9$  Hz, 3H);  $^{13}\text{C}$  NMR (100 MHz, Methanol- $d_4$ )  $\delta$  169.57, 165.77, 161.93, 144.52, 137.97, 135.38, 132.30, 130.06, 129.41, 127.48, 126.92, 126.45, 124.09, 123.99, 122.19, 106.54, 54.03, 46.52, 41.31, 31.14, 21.11, 15.38; HRMS (ESI) calcd for  $\text{C}_{23}\text{H}_{27}\text{N}_4\text{O}$   $[\text{M}+\text{H}]^+$  375.2179, found 375.2185.

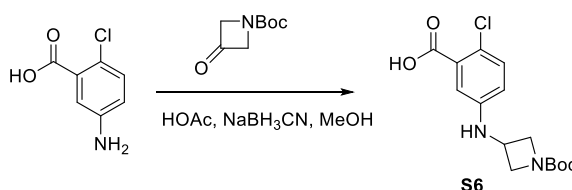

**5-((1-(tert-butoxycarbonyl)azetidin-3-yl)amino)-2-chlorobenzoic acid (S6)**. 5-amino-2-chlorobenzoic acid (3.0 g, 17.5 mmol) and tert-butyl 3-oxoazetidine-1-carboxylate (3.6 g, 21.0 mmol) was subjected to general reductive amination procedure with MeOH (20 mL), HOAc (4 mL) at 50°C, and then  $\text{NaBH}_3\text{CN}$  (3.3 g, 52.5 mmol) was added. The purification by silica gel column chromatography (Hexenes/EtOAc, 1:1) provided the amination compound **S6** (4.8 g, yield 84%) as a white solid:  $^1\text{H}$  NMR (400 MHz, Methanol- $d_4$ )  $\delta$  7.20 (d,  $J = 8.7$  Hz, 1H), 6.96 (d,  $J = 2.9$  Hz, 1H), 6.64 (dd,  $J = 8.7, 2.9$  Hz, 1H), 4.30 – 4.16 (m, 3H), 3.72 (dd,  $J = 8.7, 4.5$  Hz, 2H), 1.44 (s, 9H); LRMS (ESI) calcd for  $\text{C}_{15}\text{H}_{20}\text{ClN}_2\text{O}_4$   $[\text{M}+\text{H}]^+$  327.1, found 327.2.

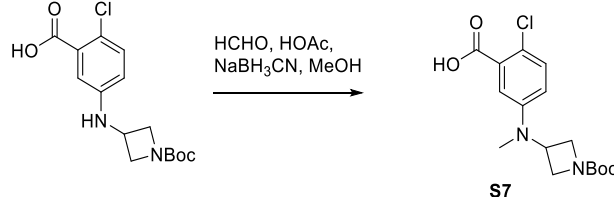

**5-((1-(tert-butoxycarbonyl)azetidin-3-yl)(methyl)amino)-2-chlorobenzoic acid (S7)**. 5-((1-(tert-butoxycarbonyl)azetidin-3-yl)amino)-2-chlorobenzoic acid (1.8 g, 5.5 mmol) and formaldehyde (37 wt. % in  $\text{H}_2\text{O}$ , 2 mL) was subjected to general reductive amination procedure with MeOH (10 mL), HOAc (2 mL) at room temperature, and then  $\text{NaBH}_3\text{CN}$  (1.1 g, 16.5 mmol) was added. The purification by silica gel column chromatography (Hexenes/EtOAc, 2:1) provided the amination compound **S7** (1.7 g, yield 91%) as a white solid:  $^1\text{H}$  NMR (400 MHz, Methanol- $d_4$ )  $\delta$  7.25 (d,  $J = 8.8$  Hz, 1H), 7.15 (d,  $J = 3.1$  Hz, 1H), 6.83 (dd,  $J = 8.9, 3.1$  Hz, 1H), 4.34 (tt,  $J = 7.5, 5.3$  Hz, 1H), 4.19 – 4.13 (m, 2H), 3.88 (dd,  $J = 9.1, 5.3$  Hz, 2H), 2.88 (s, 3H), 1.43 (s, 9H);  $^{13}\text{C}$  NMR (100 MHz, Methanol- $d_4$ )  $\delta$  169.12, 157.88, 149.62, 132.36, 123.42, 120.40, 118.49, 81.17, 54.89, 50.22, 35.75, 28.63; LRMS (ESI) calcd for  $\text{C}_{16}\text{H}_{22}\text{ClN}_2\text{O}_4$   $[\text{M}+\text{H}]^+$  341.1, found 341.1.



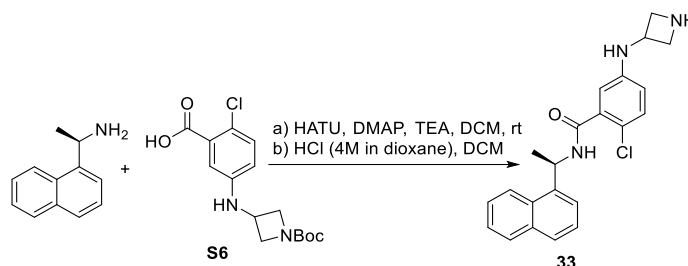

**(R)-5-(azetidin-3-ylamino)-2-chloro-N-(1-(naphthalen-1-yl)ethyl)benzamide (33).** (R)-1-(naphthalen-1-yl)ethan-1-amine (39 mg, 0.23 mmol), 5-((1-(tert-butoxycarbonyl)azetidin-3-yl)amino)-2-chlorobenzoic acid (**S6**) (50 mg, 0.15 mmol), HATU (70 mg, 0.18 mmol) and DMAP (56 mg, 0.46 mmol) was subjected to general amine coupling procedure with DMF (2 mL). After purification by Prep-HPLC, the product was subjected to general N-Boc deprotection procedure with HCl (4M in dioxane, 200  $\mu$ L) and DCM (4 mL). The purification by Prep-HPLC afforded the product **33** (43 mg, yield 75% for 2 steps) as a white solid:  $[\alpha]_{546}^{25} = -54.0$  (c 2.3, MeOH);  $^1\text{H NMR}$  (400 MHz, Methanol- $d_4$ )  $\delta$  8.51 (s, 1H), 8.25 – 8.20 (m, 1H), 7.92 – 7.87 (m, 1H), 7.80 (d,  $J = 8.2$  Hz, 1H), 7.67 – 7.63 (m, 1H), 7.59 – 7.44 (m, 3H), 7.18 (d,  $J = 8.7$  Hz, 1H), 6.62 – 6.53 (m, 2H), 6.02 (q,  $J = 6.9$  Hz, 1H), 4.48 – 4.39 (m, 1H), 4.34 – 4.26 (m, 2H), 3.94 – 3.87 (m, 2H), 1.69 (d,  $J = 7.0$  Hz, 3H);  $^{13}\text{C NMR}$  (100 MHz, Methanol- $d_4$ )  $\delta$  169.24, 146.53, 140.08, 138.22, 135.42, 132.27, 131.68, 129.89, 128.98, 127.24, 126.70, 126.42, 124.31, 123.87, 120.16, 116.24, 113.82, 54.65, 46.71, 46.49, 21.41; HRMS (ESI) calcd for  $\text{C}_{22}\text{H}_{23}\text{ClN}_3\text{O}$   $[\text{M}+\text{H}]^+$  380.1524, found 388.1532.

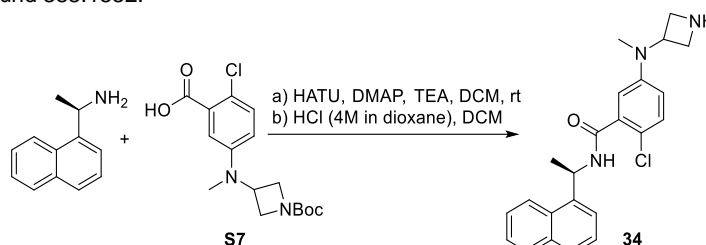

**(R)-5-(azetidin-3-yl(methyl)amino)-2-chloro-N-(1-(naphthalen-1-yl)ethyl)benzamide (34).** (R)-1-(naphthalen-1-yl)ethan-1-amine (39 mg, 0.23 mmol), 5-((1-(tert-butoxycarbonyl)azetidin-3-yl(methyl)amino)-2-chlorobenzoic acid (**S7**) (51 mg, 0.15 mmol), HATU (70 mg, 0.18 mmol) and DMAP (56 mg, 0.46 mmol) was subjected to general amine coupling procedure with DMF (2 mL). After purification by Prep-HPLC, the product was subjected to general N-Boc deprotection procedure with HCl (4M in dioxane, 200  $\mu$ L) and DCM (4 mL). The purification by Prep-HPLC afforded the **34** (49 mg, yield 83% for 2 steps) as a white solid:  $[\alpha]_{566}^{25} = -56.6$  (c 1.3, MeOH);  $^1\text{H NMR}$  (400 MHz, Methanol- $d_4$ )  $\delta$  8.50 (s, 1H), 8.26 – 8.22 (m, 1H), 7.92 – 7.88 (m, 1H), 7.81 (d,  $J = 8.2$  Hz, 1H), 7.67 – 7.64 (m, 1H), 7.60 – 7.45 (m, 3H), 7.29 (d,  $J = 8.8$  Hz, 1H), 6.85 (dd,  $J = 8.8, 3.1$  Hz, 1H), 6.76 (d,  $J = 3.0$  Hz, 1H), 6.02 (q,  $J = 6.9$  Hz, 1H), 4.65 – 4.56 (m, 1H), 4.24 – 4.17 (m, 2H), 4.14 – 4.09 (m, 2H), 2.89 (s, 3H), 1.71 (d,  $J = 6.9$  Hz, 3H);  $^{13}\text{C NMR}$  (100 MHz, Methanol- $d_4$ )  $\delta$  169.63, 149.30, 140.02, 138.14, 135.45, 132.28, 131.65, 129.91, 129.02, 127.24, 126.72, 126.43, 124.33, 123.93, 122.34, 119.54, 117.04, 52.73, 51.96, 46.81, 35.70, 21.39; HRMS (ESI) calcd for  $\text{C}_{23}\text{H}_{25}\text{ClN}_3\text{O}$   $[\text{M}+\text{H}]^+$  394.1681, found 394.1677.

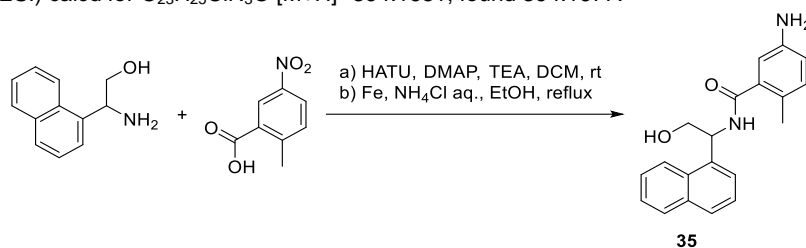

**5-amino-N-(2-hydroxy-1-(naphthalen-1-yl)ethyl)-2-methylbenzamide (35).** 2-amino-2-(naphthalen-1-yl)ethan-1-ol (100 mg, 0.53 mmol), 2-methyl-5-nitrobenzoic acid (87 mg, 0.48 mmol), HATU (202 mg, 0.53 mmol), TEA (200  $\mu$ L), and DMAP (6 mg, 0.05 mmol) was subjected to general amine coupling procedure with DCM (4 mL). After purification by Prep-HPLC, the product was applied to the general Aryl Nitro reduction procedure with ethanol/ saturated aq.  $\text{NH}_4\text{Cl}$  (4 mL/1 mL) and Iron Powder (148 mg, 2.65 mmol). The purification by Prep-HPLC gave the **35** (92 mg, yield 60% for 2 steps) as a white solid:  $^1\text{H NMR}$  (400 MHz, Methanol- $d_4$ )  $\delta$  8.34 – 8.27 (m, 1H), 7.92 – 7.85 (m, 1H), 7.84 – 7.77 (m, 1H), 7.67 – 7.42 (m, 5H), 7.25 – 6.95 (m, 1H), 6.80 – 6.67 (m, 1H), 6.10 – 6.02 (m, 1H), 4.08 – 3.99 (m, 1H), 3.94 – 3.83 (m, 1H), 2.27 (s, 3H);  $^{13}\text{C NMR}$  (100 MHz, Methanol- $d_4$ )  $\delta$  173.30, 146.27, 138.45, 136.75, 135.38, 132.31, 129.91, 129.10, 127.35, 126.72, 126.34, 124.77, 124.06, 122.34, 119.79, 118.10, 115.19, 65.35, 53.20, 18.74; HRMS (ESI) calcd for  $\text{C}_{20}\text{H}_{21}\text{N}_2\text{O}_2$   $[\text{M}+\text{H}]^+$  321.1598, found 308.1589.

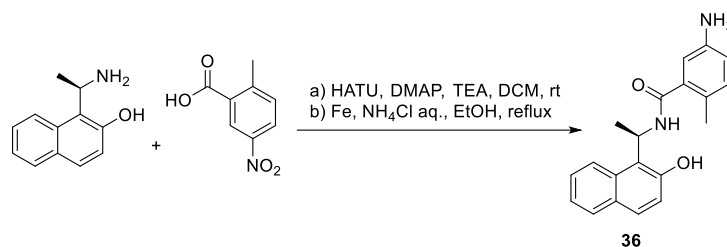

**(R)-5-amino-N-(1-(2-hydroxynaphthalen-1-yl)ethyl)-2-methylbenzamide (36).** (R)-1-(1-aminoethyl)naphthalen-2-ol (100 mg, 0.53 mmol), 2-methyl-5-nitrobenzoic acid (87 mg, 0.48 mmol), HATU (202 mg, 0.53 mmol), TEA (200  $\mu$ L), and DMAP (6 mg, 0.05 mmol) was subjected to general amine coupling procedure with DCM (4 mL). After purification by Prep-HPLC, the product was applied to the general Aryl Nitro reduction procedure with ethanol/ saturated aq.  $\text{NH}_4\text{Cl}$  (4 mL/1 mL) and Iron Powder (148 mg, 2.65 mmol). The purification by Prep-HPLC gave the **36** (87 mg, yield 57% for 2 steps) as a light brown solid:  $[\alpha]_{546}^{25} = -62.4$  (c 0.3, MeOH);  $^1\text{H NMR}$  (400 MHz, Methanol- $d_4$ )  $\delta$  8.15 (d,  $J = 8.8$  Hz, 1H), 7.77 (dd,  $J = 8.2, 1.4$  Hz, 1H), 7.69 (d,  $J = 8.9$  Hz, 1H), 7.50 (ddd,  $J = 8.5, 6.8, 1.4$  Hz, 1H), 7.35 – 7.26 (m, 1H), 7.12 (d,  $J = 8.8$  Hz, 1H), 6.96 (d,  $J = 8.1$  Hz, 1H), 6.77 – 6.67 (m, 2H), 6.19 (q,  $J = 7.0$  Hz, 1H), 2.21 (s, 3H), 1.65 (d,  $J = 7.0$  Hz, 3H);  $^{13}\text{C NMR}$  (100 MHz, Methanol- $d_4$ )  $\delta$  171.98, 153.95, 146.47, 138.44, 133.26, 132.57, 130.42, 130.13, 129.73, 127.76, 125.65, 123.92, 122.98, 120.89, 119.26, 118.30, 114.94, 44.76, 20.68, 18.67; HRMS (ESI) calcd for  $\text{C}_{20}\text{H}_{21}\text{N}_2\text{O}_2$   $[\text{M}+\text{H}]^+$  321.1598, found 321.1599.

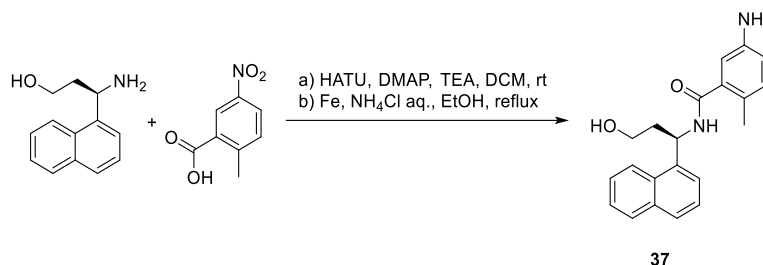

**(R)-5-amino-N-(3-hydroxy-1-(naphthalen-1-yl)propyl)-2-methylbenzamide (37).** (R)-3-amino-3-(naphthalen-1-yl)propan-1-ol (100 mg, 0.50 mmol), 2-methyl-5-nitrobenzoic acid (60 mg, 0.33 mmol), HATU (124 mg, 0.33 mmol), TEA (100  $\mu$ L), and DMAP (5 mg, 0.04 mmol) was subjected to general amine coupling procedure with DCM (4 mL). After purification by Prep-HPLC, the product was applied to the general Aryl Nitro reduction procedure with ethanol/ saturated aq.  $\text{NH}_4\text{Cl}$  (4 mL/1 mL) and Iron Powder (92 mg, 1.65 mmol). The purification by Prep-HPLC gave the **37** (62 mg, yield 56% for 2 steps) as a white solid:  $^1\text{H NMR}$  (400 MHz, Methanol- $d_4$ )  $\delta$  8.33 (dd,  $J = 8.7, 4.8$  Hz, 1H), 7.91 – 7.86 (m, 1H), 7.81 (d,  $J = 8.2$  Hz, 1H), 7.64 – 7.45 (m, 5H), 6.98 – 6.95 (m, 1H), 6.73 – 6.69 (m, 2H), 6.15 – 6.07 (m, 1H), 3.85 – 3.71 (m, 2H), 2.29 – 2.12 (m, 5H);  $^{13}\text{C NMR}$  (100 MHz, Methanol- $d_4$ )  $\delta$  173.07, 146.00, 139.67, 138.40, 135.43, 132.38, 129.87, 128.90, 127.28, 126.75, 126.39, 125.88, 124.30, 124.10, 118.30, 115.25, 60.12, 47.73, 39.41, 18.73; LRMS (ESI) calcd for  $\text{C}_{21}\text{H}_{23}\text{N}_2\text{O}_2$   $[\text{M}+\text{H}]^+$  335.2, found 335.2.

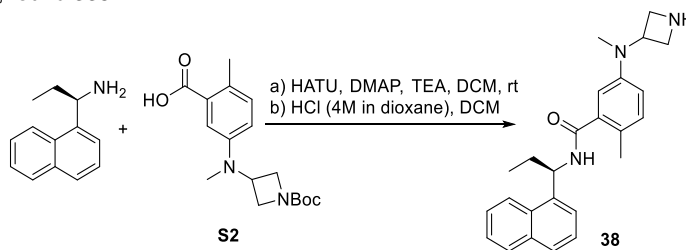

**(R)-5-(azetidin-3-yl(methyl)amino)-2-methyl-N-(1-(naphthalen-1-yl)propyl)benzamide (38).** (R)-1-(naphthalen-1-yl)propan-1-amine (17 mg, 0.09 mmol), 5-((1-(tert-butoxycarbonyl)azetidin-3-yl)(methyl)amino)-2-methylbenzoic acid (**S2**) (20 mg, 0.06 mmol), HATU (24 mg, 0.06 mmol) and DMAP (15 mg, 0.13 mmol) was subjected to general amine coupling procedure with DMF (1 mL). After purification by Prep-HPLC, the product was subjected to general N-Boc deprotection procedure with HCl (4M in dioxane, 100  $\mu$ L) and DCM (2 mL). The purification by Prep-HPLC afforded the product **38** (18 mg, yield 77% for 2 steps) as a white solid:  $[\alpha]_{546}^{25} = -65.4$  (c 0.9, MeOH);  $^1\text{H NMR}$  (400 MHz, Methanol- $d_4$ )  $\delta$  8.40 (s, 1H), 8.30 (d,  $J = 8.5$  Hz, 1H), 7.92 – 7.89 (m, 1H), 7.81 (d,  $J = 8.2$  Hz, 1H), 7.60 – 7.46 (m, 4H), 7.12 (d,  $J = 8.4$  Hz, 1H), 6.81 (dd,  $J = 8.4, 2.7$  Hz, 1H), 6.69 (d,  $J = 2.7$  Hz, 1H), 5.84 (dd,  $J = 9.0, 5.7$  Hz, 1H), 4.51 – 4.41 (m, 1H), 4.22 – 4.15 (m, 2H), 4.09 – 4.01 (m, 2H), 2.83 (s, 3H), 2.23 (s, 3H), 2.15 – 1.95 (m, 2H), 1.13 (t,  $J = 7.3$  Hz, 3H);  $^{13}\text{C NMR}$  (100 MHz, Methanol- $d_4$ )  $\delta$  172.56, 148.38, 139.84, 139.05, 135.48, 132.60, 129.96, 128.89, 128.49, 127.22, 126.72, 126.41, 124.30, 124.26, 119.66, 116.94, 53.33, 52.51, 51.97, 37.10, 29.84, 18.73, 11.92; HRMS (ESI) calcd for  $\text{C}_{25}\text{H}_{30}\text{N}_3\text{O}$   $[\text{M}+\text{H}]^+$  388.2383, found 388.2389.

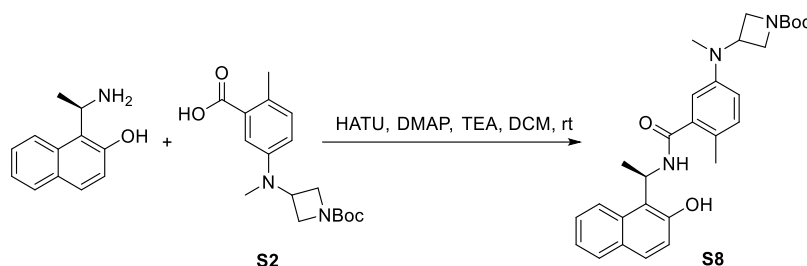

**Tert-butyl (R)-3-((3-((1-(2-hydroxynaphthalen-1-yl)ethyl)carbamoyl)-4-methylphenyl)(methyl)amino)azetidino-1-carboxylate (S8).** (R)-1-(1-aminoethyl)naphthalen-2-ol (178 mg, 0.95 mmol), 5-((1-(tert-butoxycarbonyl)azetidino-3-yl)(methyl)amino)-2-methylbenzoic acid (**S2**) (254 mg, 0.79 mmol), HATU (300 mg, 0.79 mmol), TEA (500  $\mu$ L), and DMAP (10 mg, 0.08 mmol) was subjected to general amine coupling procedure with DCM (4 mL). The purification by Prep-HPLC gave the desired compound **S8** (325 mg, yield 84%) as a white solid:  $^1\text{H NMR}$  (400 MHz, Chloroform-*d*)  $\delta$  9.07 (s, 1H), 8.15 (d,  $J = 8.7$  Hz, 1H), 7.81 – 7.72 (m, 1H), 7.61 (d,  $J = 8.8$  Hz, 1H), 7.49 – 7.44 (m, 1H), 7.34 – 7.30 (m, 1H), 7.18 (d,  $J = 8.8$  Hz, 1H), 7.01 (d,  $J = 8.3$  Hz, 1H), 6.75 – 6.56 (m, 2H), 6.31 – 6.19 (m, 1H), 4.17 – 4.04 (m, 3H), 3.84 (td,  $J = 8.1, 7.6, 5.3$  Hz, 2H), 2.70 (s, 3H), 2.32 (s, 3H), 1.65 (d,  $J = 6.9$  Hz, 3H), 1.45 (s, 9H); LRMS (ESI) calcd for  $\text{C}_{29}\text{H}_{36}\text{N}_3\text{O}_4$   $[\text{M}+\text{H}]^+$  490.3, found 490.3.

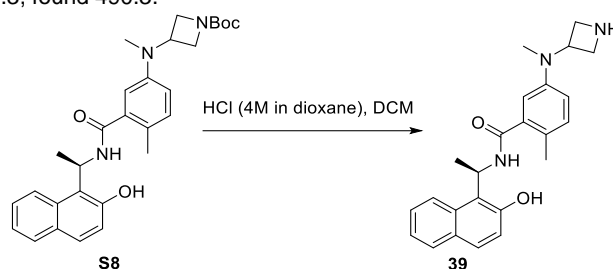

**(R)-5-(azetidino-3-yl(methyl)amino)-N-(1-(2-hydroxynaphthalen-1-yl)ethyl)-2-methylbenzamide (39).** General procedure for N-Boc deprotection was used with tert-butyl (R)-3-((3-((1-(2-hydroxynaphthalen-1-yl)ethyl)carbamoyl)-4-methylphenyl)(methyl)amino)azetidino-1-carboxylate (**S8**) (40 mg, 0.08 mmol) in DCM (2 mL) and HCl (4M in dioxane, 200  $\mu$ L). The purification by Prep-HPLC afforded the product **39** (23 mg, yield 72%) as a light brown solid:  $[\alpha]_{\text{D}}^{25} = -70.4$  (c 0.4, MeOH);  $^1\text{H NMR}$  (400 MHz, Methanol-*d*<sub>4</sub>)  $\delta$  8.55 (s, 1H), 8.17 (d,  $J = 8.7$  Hz, 1H), 7.81 – 7.75 (m, 1H), 7.70 (d,  $J = 8.8$  Hz, 1H), 7.53 – 7.48 (m, 1H), 7.33 – 7.29 (m, 1H), 7.16 – 7.12 (m, 2H), 6.83 (dd,  $J = 8.4, 2.7$  Hz, 1H), 6.78 – 6.76 (m, 1H), 6.20 (q,  $J = 6.9$  Hz, 1H), 4.47 (p,  $J = 7.2$  Hz, 1H), 4.23 – 4.16 (m, 2H), 4.07 – 4.01 (m, 2H), 2.85 (s, 3H), 2.27 (s, 3H), 1.67 (d,  $J = 7.0$  Hz, 3H);  $^{13}\text{C NMR}$  (100 MHz, Methanol-*d*<sub>4</sub>)  $\delta$  169.52, 153.96, 148.60, 138.71, 133.28, 132.89, 130.43, 130.19, 129.78, 128.42, 127.74, 123.92, 123.01, 120.93, 119.94, 119.25, 116.70, 53.46, 52.12, 44.89, 37.05, 20.51, 18.74; HRMS (ESI) calcd for  $\text{C}_{24}\text{H}_{28}\text{N}_3\text{O}_2$   $[\text{M}+\text{H}]^+$  390.2176, found 390.2185.

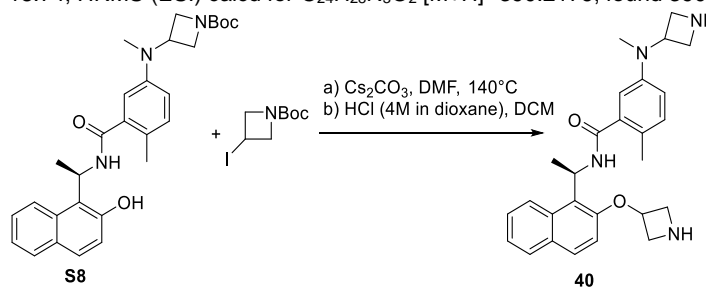

**(R)-5-(azetidino-3-yl(methyl)amino)-N-(1-(2-(azetidino-3-yloxy)naphthalen-1-yl)ethyl)-2-methylbenzamide (40).** To a solution of tert-butyl (R)-3-((3-((1-(2-hydroxynaphthalen-1-yl)ethyl)carbamoyl)-4-methylphenyl)(methyl)amino)azetidino-1-carboxylate (**S8**) (20 mg, 0.04 mmol) and tert-butyl 3-iodoazetidino-1-carboxylate (14 mg, 0.05 mol) in DMF (1 mL),  $\text{Cs}_2\text{CO}_3$  (26 mg, 0.08 mmol) was added. The reaction was stirred at 140  $^\circ\text{C}$  for 5 h. After cooling down, quench the reaction with MeOH (1 mL). The mixture was diluted with Ethyl Acetate and was then washed with saturated aq.  $\text{NaHCO}_3$ , water, and brine, respectively. The organic layer was dried over  $\text{Na}_2\text{SO}_4$ , filtered, and concentrated. After purification by Prep-HPLC, the product was applied to the general procedure for N-Boc deprotection with HCl (4M in dioxane, 50  $\mu$ L) and DCM (1 mL). The purification by Prep-HPLC afforded the product **40** (8 mg, yield 45% for 2 steps) as a light brown solid:  $[\alpha]_{\text{D}}^{25} = -87$  (c 0.6, MeOH);  $^1\text{H NMR}$  (400 MHz, Methanol-*d*<sub>4</sub>)  $\delta$  8.53 (s, 1H), 8.41 (d,  $J = 8.7$  Hz, 1H), 7.91 – 7.82 (m, 2H), 7.57 – 7.52 (m, 1H), 7.46 – 7.06 (m, 3H), 6.80 – 6.75 (m, 1H), 6.65 – 6.62 (m, 1H), 6.24 (dq,  $J = 9.8, 7.4$  Hz, 1H), 5.44 – 5.09 (m, 1H), 4.59 – 4.28 (m, 3H), 4.22 – 4.12 (m, 2H), 4.07 – 3.97 (m, 3H), 3.56 – 3.43 (m, 1H), 2.84 (s, 3H), 2.10 (d,  $J = 9.0$  Hz, 3H), 1.77 (d,  $J = 7.4$  Hz, 3H);  $^{13}\text{C NMR}$  (100 MHz, Methanol-*d*<sub>4</sub>)  $\delta$  172.23, 152.57, 148.36, 146.49, 138.90, 138.51, 132.55, 131.04, 130.42, 130.28, 127.61, 125.15, 125.05, 119.45, 116.92, 115.78, 114.98, 70.75, 54.93, 54.77, 53.39, 52.07, 44.41, 36.58, 20.06, 18.47; HRMS (ESI) calcd for  $\text{C}_{27}\text{H}_{33}\text{N}_4\text{O}_2$   $[\text{M}+\text{H}]^+$  445.2598, found 445.2587.

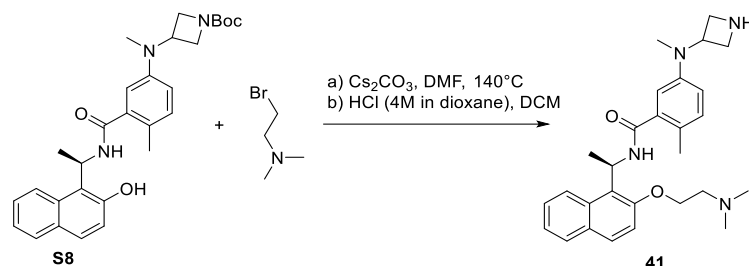

**(R)-5-(azetidin-3-yl(methyl)amino)-N-(1-(2-(2-(dimethylamino)ethoxy)naphthalen-1-yl)ethyl)-2-methylbenzamide (41).** To a solution of tert-butyl (R)-3-((3-((1-(2-hydroxynaphthalen-1-yl)ethyl)carbamoyl)-4-methylphenyl)(methyl)amino)azetidine-1-carboxylate (**S8**) (20 mg, 0.04 mmol) and 2-bromo-N,N-dimethylethan-1-amine (12 mg, 0.05 mol) in DMF (1 mL), Cs<sub>2</sub>CO<sub>3</sub> (26 mg, 0.08 mmol) was added. The reaction was stirred at 140 °C for 5 h. After cooling down, quench the reaction with MeOH (1 mL). The mixture was diluted with Ethyl Acetate and was then washed with saturated aq. NaHCO<sub>3</sub>, water, and brine, respectively. The organic layer was dried over Na<sub>2</sub>SO<sub>4</sub>, filtered, and concentrated. After purification by Prep-HPLC, the product was applied to the general procedure for N-Boc deprotection with HCl (4M in dioxane, 50  $\mu$ L) and DCM (1 mL). The purification by Prep-HPLC afforded the product **41** (9 mg, yield 49% for 2 steps) as a light brown solid: [ $\alpha$ ]<sub>D</sub><sup>25</sup> = -57.8 (c 0.5, MeOH); <sup>1</sup>H NMR (400 MHz, Methanol-*d*<sub>4</sub>)  $\delta$  8.53 (s, 1H), 8.31 (d, *J* = 8.9 Hz, 1H), 7.88 – 7.83 (m, 2H), 7.58 – 7.52 (m, 1H), 7.44 – 7.36 (m, 2H), 7.12 (d, *J* = 8.4 Hz, 1H), 6.80 (dd, *J* = 8.4, 2.7 Hz, 1H), 6.65 (d, *J* = 2.7 Hz, 1H), 6.36 (q, *J* = 7.3 Hz, 1H), 4.51 – 3.99 (m, 9H), 2.83 (s, 3H), 2.26 – 2.03 (m, 9H), 1.72 (d, *J* = 7.1 Hz, 3H); <sup>13</sup>C NMR (100 MHz, Methanol-*d*<sub>4</sub>)  $\delta$  172.40, 148.53, 132.90, 132.54, 130.75, 130.01, 128.07, 127.85, 124.74, 120.95, 119.30, 116.70, 115.42, 66.20, 59.41, 53.35, 52.08, 45.01, 44.06, 36.94, 20.61, 18.43; HRMS (ESI) calcd for C<sub>28</sub>H<sub>37</sub>N<sub>4</sub>O<sub>2</sub> [M+H]<sup>+</sup> 461.2911, found 461.2918.

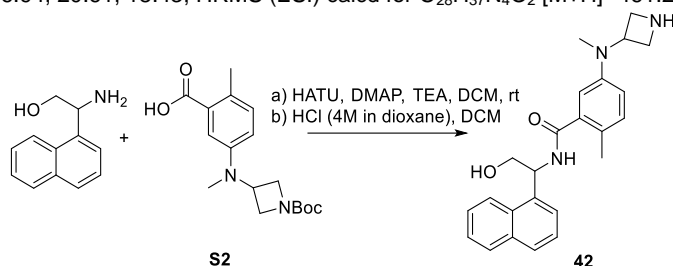

**5-(azetidin-3-yl(methyl)amino)-N-(2-hydroxy-1-(naphthalen-1-yl)ethyl)-2-methylbenzamide (42).** 2-amino-2-(naphthalen-1-yl)ethan-1-ol (100 mg, 0.53 mmol), 5-((1-(tert-butoxycarbonyl)azetidin-3-yl)(methyl)amino)-2-methylbenzoic acid (**S2**) (170 mg, 0.53 mmol), HATU (201 mg, 0.53 mmol), DMAP (6 mg, 0.05 mmol) and TEA (200  $\mu$ L) was subjected to general amine coupling procedure with DCM (4 mL). After purification by Prep-HPLC, the product was subjected to general N-Boc deprotection procedure with HCl (4M in dioxane, 200  $\mu$ L) and DCM (4 mL). The purification by Prep-HPLC afforded the product **42** (151 mg, yield 73% for 2 steps) as a white solid: <sup>1</sup>H NMR (400 MHz, Methanol-*d*<sub>4</sub>)  $\delta$  8.62 – 8.59 (m, 1H), 8.34 – 8.29 (m, 1H), 7.94 – 7.89 (m, 1H), 7.85 – 7.81 (m, 1H), 7.63 – 7.45 (m, 4H), 7.09 (d, *J* = 8.1 Hz, 1H), 6.85 – 6.79 (m, 2H), 6.09 – 6.03 (m, 1H), 4.53 – 4.47 (m, 1H), 4.29 – 4.21 (m, 2H), 4.11 – 4.02 (m, 3H), 3.90 (dd, *J* = 11.5, 8.3 Hz, 1H), 2.87 (s, 3H), 2.26 (s, 3H); <sup>13</sup>C NMR (100 MHz, Methanol-*d*<sub>4</sub>)  $\delta$  162.40, 148.38, 138.93, 138.53, 135.46, 132.64, 132.19, 129.99, 129.07, 128.88, 127.41, 126.82, 126.34, 124.29, 124.05, 119.96, 117.17, 65.42, 53.43, 52.22, 46.99, 37.30, 18.75; HRMS (ESI) calcd for C<sub>28</sub>H<sub>37</sub>N<sub>4</sub>O<sub>2</sub> [M+H]<sup>+</sup> 461.2911, found 461.2918.

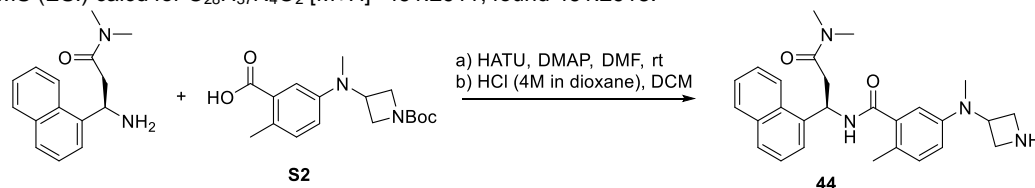

**(R)-5-(azetidin-3-yl(methyl)amino)-N-(3-(dimethylamino)-1-(naphthalen-1-yl)-3-oxopropyl)-2-methylbenzamide (44).** (R)-3-amino-N,N-dimethyl-3-(naphthalen-1-yl)propanamide (36 mg, 0.15 mmol), 5-((1-(tert-butoxycarbonyl)azetidin-3-yl)(methyl)amino)-2-methylbenzoic acid (**S2**) (48 mg, 0.15 mmol), HATU (70 mg, 0.18 mmol) and DMAP (56 mg, 0.46 mmol) was subjected to general amine coupling procedure with DMF (2 mL). After purification by Prep-HPLC, the product was subjected to general N-Boc deprotection procedure with HCl (4M in dioxane, 200  $\mu$ L) and DCM (4 mL). The purification by Prep-HPLC afforded the product **44** (57 mg, yield 86% for 2 steps) as a white solid: <sup>1</sup>H NMR (400 MHz, Methanol-*d*<sub>4</sub>)  $\delta$  8.55 (s, 1H), 8.31 (d, *J* = 8.5 Hz, 1H), 7.97 – 7.82 (m, 2H), 7.63 – 7.45 (m, 4H), 7.12 (d, *J* = 8.3 Hz, 1H), 6.82 (dd, *J* = 8.3, 2.6 Hz, 1H), 6.76 (d, *J* = 2.6 Hz, 1H), 6.44 (dd, *J* = 8.6, 5.5 Hz, 1H), 4.49 – 4.37 (m, 1H), 4.21 – 4.12 (m, 2H), 4.06 – 3.95 (m, 2H), 3.20 – 3.05 (m, 2H), 2.99 (s, 3H), 2.92 (s, 3H), 2.84 (s, 3H), 2.24 (s, 3H); <sup>13</sup>C NMR (100 MHz, Methanol-*d*<sub>4</sub>)  $\delta$  172.49, 172.13, 135.54, 132.63, 132.19, 130.05, 129.30, 127.52, 126.93, 126.38, 124.30, 124.15, 119.78, 116.85, 53.80, 52.25, 39.61, 37.90, 37.17, 35.92, 18.68; HRMS (ESI) calcd for C<sub>27</sub>H<sub>33</sub>N<sub>4</sub>O<sub>2</sub> [M+H]<sup>+</sup> 445.2598, found 445.2590.

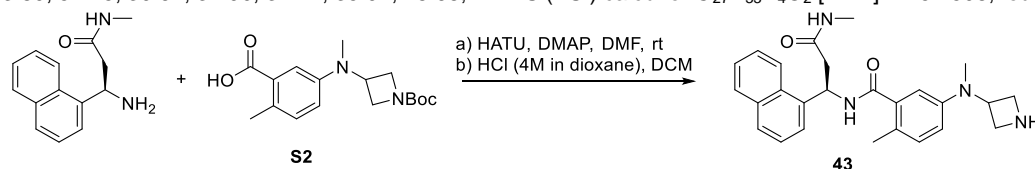

**(R)-3-(azetidin-3-yl(methyl)amino)-N-(3-(methylamino)-1-(naphthalen-1-yl)-3-oxopropyl)benzamide (43).** (R)-3-amino-N-methyl-3-(naphthalen-1-yl)propanamide (34 mg, 0.15 mmol), 5-((1-(tert-butoxycarbonyl)azetidin-3-yl)(methyl)amino)-2-methylbenzoic acid (**S2**) (48 mg, 0.15 mmol), HATU (70 mg, 0.18 mmol) and DMAP (56 mg, 0.46 mmol) was subjected to general amine coupling procedure with DMF (2 mL). After purification by Prep-HPLC, the product was subjected to general N-Boc deprotection procedure with HCl (4M in dioxane, 200  $\mu$ L) and DCM (4 mL). The purification by Prep-HPLC afforded the product **43** (45 mg, yield 70% for 2 steps) as a white solid:  $[\alpha]_{546}^{25} = -17.9$  (c 0.5, MeOH);  $^1\text{H NMR}$  (400 MHz, Methanol- $d_4$ )  $\delta$  8.55 (s, 1H), 8.37 (d,  $J = 8.1$  Hz, 1H), 7.92 (d,  $J = 7.8$  Hz, 1H), 7.83 (d,  $J = 8.8$  Hz, 1H), 7.63 – 7.45 (m, 4H), 7.12 (d,  $J = 8.1$  Hz, 1H), 6.84 – 6.80 (m, 1H), 6.76 – 6.74 (m, 1H), 6.43 – 6.38 (m, 1H), 4.48 (p,  $J = 7.3$  Hz, 1H), 4.20 – 4.15 (m, 2H), 4.06 – 3.99 (m, 2H), 2.98 – 2.81 (m, 5H), 2.71 (s, 3H), 2.23 (s, 3H);  $^{13}\text{C NMR}$  (100 MHz, Methanol- $d_4$ )  $\delta$  173.41, 172.04, 148.51, 138.64, 138.55, 135.51, 132.67, 132.15, 129.98, 129.30, 128.52, 127.48, 126.90, 126.35, 124.25, 119.81, 116.82, 53.68, 52.24, 42.52, 37.09, 26.45, 18.69; HRMS (ESI) calcd for  $\text{C}_{26}\text{H}_{31}\text{N}_4\text{O}_2$   $[\text{M}+\text{H}]^+$  431.2442, found 431.2441.

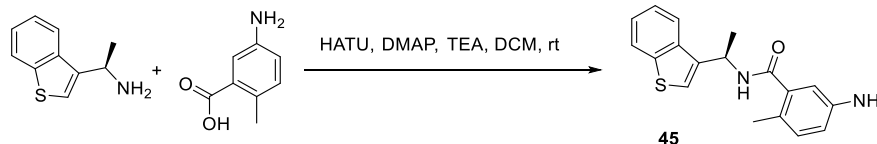

**(R)-5-amino-N-(1-(benzo[b]thiophen-3-yl)ethyl)-2-methylbenzamide (45).** (R)-1-(benzo[b]thiophen-3-yl)ethan-1-amine (57 mg, 0.32 mmol), 5-amino-2-methylbenzoic acid (24 mg, 0.16 mmol), HATU (61 mg, 0.16 mmol), TEA (100  $\mu$ L), and DMAP (3 mg, 0.02 mmol) was subjected to general amine coupling procedure with DCM (2 mL). The purification by Prep-HPLC afforded the product **45** (41 mg, yield 83%) as a light brown solid:  $[\alpha]_{546}^{25} = -34.7$  (c 1.4, MeOH);  $^1\text{H NMR}$  (400 MHz, Chloroform- $d$ )  $\delta$  7.97 – 7.92 (m, 1H), 7.88 – 7.83 (m, 1H), 7.45 – 7.30 (m, 3H), 6.96 – 6.91 (m, 1H), 6.60 – 6.55 (m, 2H), 5.80 – 5.69 (m, 1H), 2.29 (s, 3H), 1.75 (d,  $J = 6.7$  Hz, 3H);  $^{13}\text{C NMR}$  (100 MHz, Chloroform- $d$ )  $\delta$  172.91, 144.23, 140.71, 137.90, 131.99, 125.47, 124.89, 124.53, 122.98, 122.46, 122.35, 116.86, 116.82, 113.47, 113.44, 43.15, 20.44, 18.87; HRMS (ESI) calcd for  $\text{C}_{18}\text{H}_{18}\text{N}_3\text{O}_3$   $[\text{M}+\text{H}]^+$  324.1343, found 324.1341.

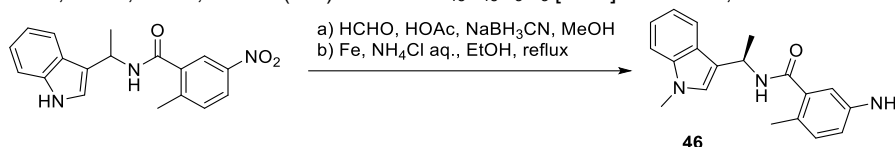

**(R)-5-amino-2-methyl-N-(1-(1-methyl-1H-indol-3-yl)ethyl)benzamide (46).** N-(1-(1H-indol-3-yl)ethyl)-2-methyl-5-nitrobenzamide (50 mg, 0.15 mmol) and formaldehyde (37 wt. % in  $\text{H}_2\text{O}$ , 100  $\mu$ L) was subjected to general reductive amination procedure with MeOH (2 mL), HOAc (50  $\mu$ L) at room temperature, and then  $\text{NaBH}_3\text{CN}$  (47 mg, 0.75 mmol) was added. After purification by Prep-HPLC, the product was applied to the general Aryl Nitro reduction procedure with ethanol/ saturated aq.  $\text{NH}_4\text{Cl}$  (4 mL/1 mL) and Iron Powder (42 mg, 0.75 mmol). The purification by Prep-HPLC afforded the desired product **46** (33 mg, yield 72%) as a light brown solid:  $^1\text{H NMR}$  (400 MHz, Chloroform- $d$ )  $\delta$  7.73 (dt,  $J = 7.9, 1.0$  Hz, 1H), 7.34 – 7.23 (m, 2H), 7.17 – 7.11 (m, 1H), 7.05 – 7.00 (m, 1H), 6.94 (d,  $J = 8.1$  Hz, 1H), 6.64 (d,  $J = 2.6$  Hz, 1H), 6.59 (dd,  $J = 8.1, 2.5$  Hz, 1H), 5.92 (d,  $J = 8.2$  Hz, 1H), 5.64 (tt,  $J = 7.4, 6.4$  Hz, 1H), 3.77 (s, 3H), 2.32 (s, 3H), 1.73 (d,  $J = 6.7$  Hz, 3H); LRMS (ESI) calcd for  $\text{C}_{19}\text{H}_{22}\text{N}_3\text{O}$   $[\text{M}+\text{H}]^+$  308.2, found 308.1.

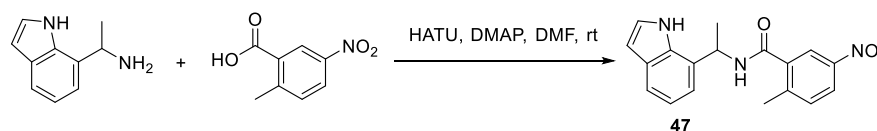

**N-(1-(1H-indol-7-yl)ethyl)-2-methyl-5-nitrobenzamide (47).** 1-(1H-indol-7-yl)ethan-1-amine (100 mg, 0.62 mmol), 2-methyl-5-nitrobenzoic acid (101 mg, 0.56 mmol), HATU (213 mg, 0.56 mmol) and DMAP (205 mg, 1.68 mmol) was subjected to general amine coupling procedure with DMF (3 mL). The purification by Prep-HPLC afforded the **47** (142 mg, yield 78%) as a brown solid:  $^1\text{H NMR}$  (400 MHz, Methanol- $d_4$ )  $\delta$  8.16 – 8.12 (m, 2H), 7.51 – 7.48 (m, 1H), 7.44 – 7.40 (m, 1H), 7.28 (d,  $J = 3.2$  Hz, 1H), 7.18 – 7.15 (m, 1H), 7.05 – 7.00 (m, 1H), 6.49 (d,  $J = 3.2$  Hz, 1H), 5.71 (q,  $J = 7.0$  Hz, 1H), 2.37 (s, 3H), 1.70 (d,  $J = 7.0$  Hz, 3H);  $^{13}\text{C NMR}$  (100 MHz, Methanol- $d_4$ )  $\delta$  169.94, 147.22, 144.92, 139.02, 135.22, 132.90, 129.95, 127.31, 125.58, 125.21, 122.99, 120.69, 120.25, 118.45, 103.00, 46.58, 20.38, 19.70; HRMS (ESI) calcd for  $\text{C}_{18}\text{H}_{19}\text{N}_2\text{O}_5$   $[\text{M}+\text{H}]^+$  311.1213, found 311.1215.

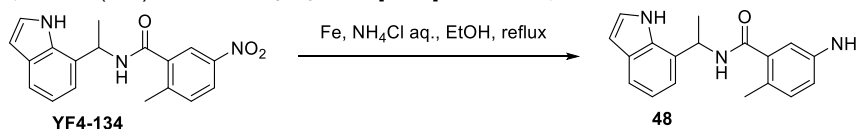

**N-(1-(1H-indol-7-yl)ethyl)-5-amino-2-methylbenzamide (48).** To a solution of N-(1-(1H-indol-7-yl)ethyl)-2-methyl-5-nitrobenzamide (**47**) (80 mg, 0.25 mmol) in ethanol/ saturated aq.  $\text{NH}_4\text{Cl}$  (4/1 mL), Fe powder (67 mg, 1.2 mmol) was added. The resulting solution was stirred for 2 h at 80°C and then concentrated under vacuum. The residue was extracted with 3x10 mL of ethyl acetate and the organic layers combined. The organic layer was washed with 5 mL of brine, dried and concentrated under vacuum to remove the solvent. The residue was purified by Prep-HPLC to obtain the desired product **48** (62 mg, yield 85%) as a light brown solid:  $^1\text{H NMR}$  (400 MHz, Methanol- $d_4$ )  $\delta$  7.50 – 7.46 (m, 1H), 7.25 (d,  $J = 3.1$  Hz, 1H), 7.18 – 7.14 (m, 1H), 7.05 – 6.98 (m, 1H), 6.94 – 6.91 (m, 1H), 6.66 (d,  $J = 7.2$  Hz, 2H), 6.48 (d,  $J = 3.2$  Hz, 1H), 5.67 (q,  $J = 7.0$  Hz, 1H), 2.15 (s, 3H), 1.67 (d,  $J = 7.0$  Hz, 3H);  $^{13}\text{C NMR}$  (100 MHz, Methanol- $d_4$ )  $\delta$  173.02, 146.38, 138.36, 135.29, 132.29, 129.83, 127.59, 125.60, 125.44, 120.54, 120.19, 118.61, 118.02, 115.03, 102.98, 102.91, 46.29, 20.26, 18.49; HRMS (ESI) calcd for  $\text{C}_{18}\text{H}_{20}\text{N}_3\text{O}$   $[\text{M}+\text{H}]^+$  294.1601, found 294.1606.

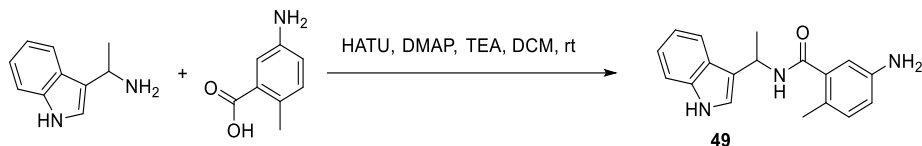

**N-(1-(1H-indol-3-yl)ethyl)-5-amino-2-methylbenzamide (49).** 1-(1H-indol-3-yl)ethan-1-amine (75 mg, 0.47 mmol), 5-amino-2-methylbenzoic acid (47 mg, 0.31 mmol), HATU (118 mg, 0.31 mmol), TEA (100  $\mu$ L), and DMAP (4 mg, 0.03 mmol) was subjected to general amine coupling procedure with DCM (2 mL). The purification by Prep-HPLC afforded the product **49** (55 mg, yield 60%) as a brown solid:  $^1\text{H}$  NMR (400 MHz, Methanol- $d_4$ )  $\delta$  7.72 – 7.67 (m, 1H), 7.36 – 7.33 (m, 1H), 7.23 – 7.21 (m, 1H), 7.17 – 6.98 (m, 3H), 6.95 – 6.89 (m, 1H), 6.67 – 6.62 (m, 1H), 5.66 – 5.55 (m, 1H), 2.22 (s, 3H), 1.68 (d,  $J$  = 6.8 Hz, 3H);  $^{13}\text{C}$  NMR (100 MHz, Methanol- $d_4$ )  $\delta$  172.38, 161.60, 146.27, 138.70, 138.35, 132.25, 125.56, 122.73, 122.62, 119.97, 119.93, 119.89, 117.95, 115.12, 112.34, 43.03, 20.85, 18.66; HRMS (ESI) calcd for  $\text{C}_{18}\text{H}_{20}\text{N}_3\text{O}$  [ $\text{M}+\text{H}$ ] $^+$  294.1601, found 294.1649.

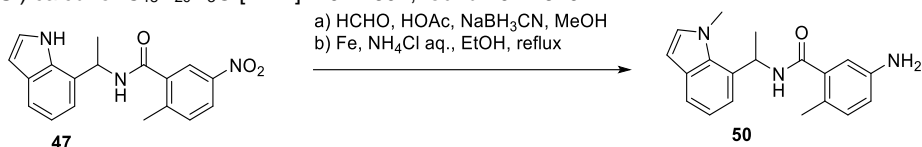

**5-amino-2-methyl-N-(1-(1-methyl-1H-indol-7-yl)ethyl)benzamide (50).** N-(1-(1H-indol-7-yl)ethyl)-2-methyl-5-nitrobenzamide (50 mg, 0.15 mmol) and formaldehyde (37 wt. % in  $\text{H}_2\text{O}$ , 100  $\mu$ L) was subjected to general reductive amination procedure with MeOH (2 mL), HOAc (50  $\mu$ L) at room temperature, and then  $\text{NaBH}_3\text{CN}$  (47 mg, 0.75 mmol) was added. After purification by Prep-HPLC, the product was dissolved in ethanol/ saturated aq.  $\text{NH}_4\text{Cl}$  (4 mL/1 mL), and then Fe powder (42 mg, 0.75 mmol) was added. The resulting solution was stirred for 2 h at 80°C and then concentrated under vacuum. The residue was extracted with 3x10 mL of ethyl acetate and the organic layers were combined. The organic mixture was washed with brine, dried and concentrated under vacuum. The residue was purified by Prep-HPLC to obtain the desired product **50** (31 mg, yield 67%) as a brown solid:  $^1\text{H}$  NMR (400 MHz, Methanol- $d_4$ )  $\delta$  7.58 – 7.51 (m, 1H), 7.33 (d,  $J$  = 7.4 Hz, 1H), 7.14 – 6.93 (m, 3H), 6.71 – 6.62 (m, 2H), 6.51 – 6.42 (m, 2H), 4.08 (s, 3H), 2.43 (s, 3H), 1.74 (d,  $J$  = 6.8 Hz, 3H);  $^{13}\text{C}$  NMR (100 MHz, Methanol- $d_4$ )  $\delta$  174.63, 147.31, 137.70, 132.89, 132.32, 130.95, 125.77, 122.91, 122.38, 121.54, 120.09, 119.60, 117.35, 102.21, 46.05, 32.01, 17.89, 15.94; HRMS (ESI) calcd for  $\text{C}_{19}\text{H}_{22}\text{N}_3\text{O}$  [ $\text{M}+\text{H}$ ] $^+$  308.1757, found 308.1709.

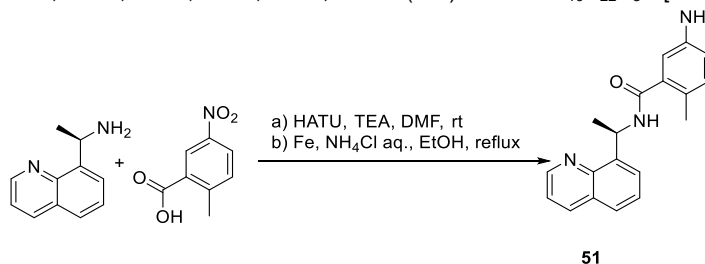

**(R)-5-amino-2-methyl-N-(1-(quinolin-8-yl)ethyl)benzamide (51).** (R)-1-(quinolin-8-yl)ethan-1-amine (60 mg, 0.29 mmol), 2-methyl-5-nitrobenzoic acid (68 mg, 0.37 mmol), HATU (215 mg, 0.58 mmol), TEA (100  $\mu$ L), and DMAP (5 mg, 0.04 mmol) was subjected to general amine coupling procedure with DMF (5 mL). After purification by Prep-HPLC, the product was applied to the general Aryl Nitro reduction procedure with ethanol/ saturated aq.  $\text{NH}_4\text{Cl}$  (4 mL/1 mL) and Iron Powder (67 mg, 1.20 mmol). The purification by Prep-HPLC gave the **51** (55 mg, 63% for 2 steps) as a white solid:  $^1\text{H}$  NMR (400 MHz, Methanol- $d_4$ )  $\delta$  8.91 (dd,  $J$  = 4.1, 2.0 Hz, 1H), 8.37 – 8.22 (m, 1H), 7.91 (d,  $J$  = 2.4 Hz, 1H), 7.86 – 7.81 (m, 1H), 7.77 (d,  $J$  = 7.1 Hz, 1H), 7.62 – 7.55 (m, 1H), 7.50 (dt,  $J$  = 8.1, 4.0 Hz, 1H), 7.16 (d,  $J$  = 2.5 Hz, 1H), 6.24 (q,  $J$  = 7.9, 6.9 Hz, 1H), 2.38 (s, 3H), 1.66 (d,  $J$  = 7.0 Hz, 3H);  $^{13}\text{C}$  NMR (100 MHz, Methanol- $d_4$ )  $\delta$  162.01, 150.68, 150.62, 146.69, 144.42, 143.26, 142.50, 141.69, 138.06, 136.20, 136.09, 130.14, 128.57, 127.54, 127.19, 122.74, 122.43, 49.00, 47.98, 22.64, 20.47; HRMS (ESI) calcd for  $\text{C}_{19}\text{H}_{20}\text{N}_3\text{O}$  [ $\text{M}+\text{H}$ ] $^+$  306.1601, found 306.1600.

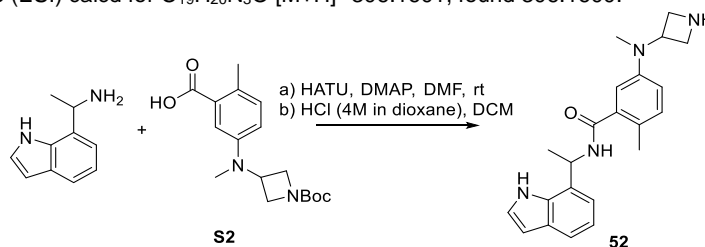

**N-(1-(1H-indol-7-yl)ethyl)-5-(azetidin-3-yl(methyl)amino)-2-methylbenzamide (52).** 1-(1H-indol-7-yl)ethan-1-amine (24 mg, 0.15 mmol), 5-((1-(tert-butoxycarbonyl)azetidin-3-yl(methyl)amino)-2-methylbenzoic acid (**S2**) (40 mg, 0.13 mmol), HATU (48 mg, 0.13 mmol) and DMAP (31 mg, 0.25 mmol) was subjected to general amine coupling procedure with DMF (1 mL). After purification by Prep-HPLC, the product was subjected to general N-Boc deprotection procedure with HCl (4M in dioxane, 100  $\mu$ L) and DCM (2 mL). The purification by Prep-HPLC afforded the product **52** (33 mg, yield 70% for 2 steps) as a white solid:  $^1\text{H}$  NMR (400 MHz, Methanol- $d_4$ )  $\delta$  8.38 (s, 1H), 7.49 (dd,  $J$  = 7.9, 1.1 Hz, 1H), 7.28 (d,  $J$  = 3.2 Hz, 1H), 7.14 (dd,  $J$  = 18.8, 7.8 Hz, 2H), 7.05 – 6.99 (m, 1H), 6.81 (dd,  $J$  = 8.3, 2.7 Hz, 1H), 6.72 (d,  $J$  = 2.7 Hz, 1H), 6.49 (d,  $J$  = 3.1 Hz, 1H), 5.69 (q,  $J$  = 6.9 Hz, 1H), 4.52 – 4.43 (m, 1H), 4.23 – 4.17 (m, 2H), 4.09 – 4.03 (m, 2H), 2.84 (s, 3H), 2.20 (s, 3H), 1.69 (d,  $J$  = 7.0 Hz, 3H);  $^{13}\text{C}$  NMR (100 MHz, Methanol- $d_4$ )  $\delta$  172.48, 138.84, 135.24,

132.63, 129.91, 128.54, 127.61, 125.49, 120.59, 120.22, 119.76, 118.60, 116.90, 102.97, 53.34, 52.04, 46.50, 37.07, 20.40, 18.53; HRMS (ESI) calcd for  $C_{22}H_{27}N_4O$   $[M+H]^+$  363.2179, found 363.2179.

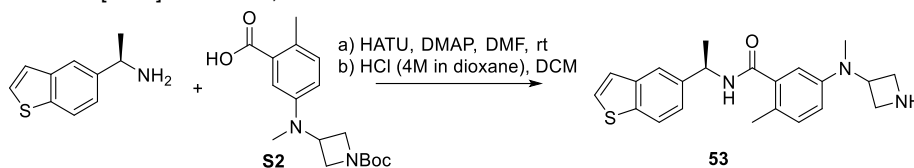

**(R)-5-(azetid-3-yl(methyl)amino)-N-(1-(benzo[b]thiophen-5-yl)ethyl)-2-methylbenzamide (53).** (R)-1-(benzo[b]thiophen-5-yl)ethan-1-amine (21 mg, 0.12 mmol), 5-((1-(tert-butoxycarbonyl)azetid-3-yl)(methyl)amino)-2-methylbenzoic acid (**S2**) (32 mg, 0.10 mmol), HATU (76 mg, 0.20 mmol) and DMAP (44 mg, 0.36 mmol) was subjected to general amine coupling procedure with DMF (1 mL). After purification by Prep-HPLC, the product was subjected to general N-Boc deprotection procedure with HCl (4M in dioxane, 100  $\mu$ L) and DCM (2 mL). The purification by Prep-HPLC afforded the product **53** (30 mg, yield 79% for 2 steps) as a white solid:  $^1H$  NMR (400 MHz, Methanol- $d_4$ )  $\delta$  8.54 (s, 1H), 7.92 – 7.85 (m, 2H), 7.57 (d,  $J$  = 5.4 Hz, 1H), 7.45 – 7.39 (m, 1H), 7.36 (d,  $J$  = 5.4 Hz, 1H), 7.13 (d,  $J$  = 8.4 Hz, 1H), 6.81 (dd,  $J$  = 8.3, 2.6 Hz, 1H), 6.76 (d,  $J$  = 2.5 Hz, 1H), 5.33 (q,  $J$  = 7.0 Hz, 1H), 4.51 (p,  $J$  = 7.3 Hz, 1H), 4.22 (dd,  $J$  = 11.3, 7.6 Hz, 2H), 4.13 – 4.02 (m, 2H), 2.86 (s, 3H), 2.24 (s, 3H), 1.61 (s, 3H);  $^{13}C$  NMR (100 MHz, Methanol- $d_4$ )  $\delta$  172.16, 148.44, 141.53, 141.35, 139.91, 138.96, 132.60, 128.45, 128.07, 124.88, 124.00, 123.48, 123.48, 122.08, 119.65, 116.87, 53.35, 52.01, 50.66, 49.00, 37.03, 22.50, 18.64; HRMS (ESI) calcd for  $C_{22}H_{26}N_3OS$   $[M+H]^+$  380.1791, found 380.1798.

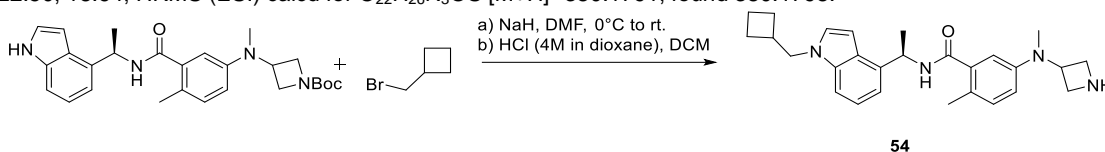

**(R)-5-(azetid-3-yl(methyl)amino)-N-(1-(1-(cyclobutylmethyl)-1H-indol-4-yl)ethyl)-2-methylbenzamide (54).** To a solution of tert-butyl (R)-3-((3-((1-(1H-indol-4-yl)ethyl)carbamoyl)-4-methylphenyl)(methyl)amino)azetidine-1-carboxylate (25 mg, 0.05 mmol) in dry DMF (2 mL), sodium hydride (4 mg, 0.08 mmol) was added at 0  $^{\circ}C$ . After 15 minutes, the mixture was added (bromomethyl)cyclobutane (9 mg, 0.06 mmol) and stirred at 25  $^{\circ}C$  for another 16 hours. Quench the reaction with methanol and remove the solvent. The residue was purified by preparative HPLC system to obtain the desired product.

The product from previous step was subjected to general N-Boc deprotection procedure with HCl (4M in dioxane, 200  $\mu$ L) and DCM (4 mL). The purification by Prep-HPLC afforded the product **54** (17 mg, yield 80% for 2 steps) as a white solid:  $^1H$  NMR (400 MHz, Methanol- $d_4$ )  $\delta$  8.53 (s, 1H), 7.33 (d,  $J$  = 8.1 Hz, 1H), 7.25 (d,  $J$  = 3.2 Hz, 1H), 7.18 – 7.07 (m, 3H), 6.79 (dd,  $J$  = 8.3, 2.7 Hz, 1H), 6.73 (d,  $J$  = 2.6 Hz, 1H), 6.66 (d,  $J$  = 3.7 Hz, 1H), 5.62 (q,  $J$  = 7.0 Hz, 1H), 4.46 (p,  $J$  = 7.2 Hz, 1H), 4.19 (dd,  $J$  = 12.3, 7.4 Hz, 4H), 4.05 (dd,  $J$  = 10.3, 7.4 Hz, 2H), 2.83 (s, 3H), 2.23 (s, 3H), 2.06 – 1.96 (m, 2H), 1.93 – 1.79 (m, 4H), 1.65 (d,  $J$  = 7.0 Hz, 3H).  $^{13}C$  NMR (100 MHz, Methanol- $d_4$ )  $\delta$  148.36, 139.08, 137.99, 136.30, 132.56, 129.04, 128.62, 127.88, 122.25, 119.64, 117.05, 116.55, 111.39, 109.89, 99.99, 53.41, 52.28, 52.02, 49.00, 37.58, 37.12, 27.10, 21.24, 18.98, 18.65; HRMS (ESI) calcd for  $C_{27}H_{35}N_4O$   $[M+H]^+$  431.2805, found 431.2811.

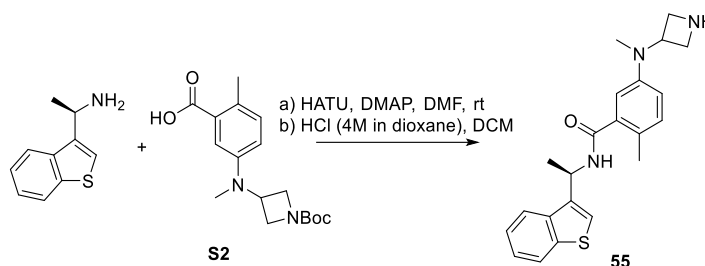

**(R)-5-(azetid-3-yl(methyl)amino)-N-(1-(benzo[b]thiophen-3-yl)ethyl)-2-methylbenzamide (55).** (R)-1-(benzo[b]thiophen-3-yl)ethan-1-amine (30 mg, 0.14 mmol), 5-((1-(tert-butoxycarbonyl)azetid-3-yl)(methyl)amino)-2-methylbenzoic acid (**S2**) (49 mg, 0.15 mmol), HATU (57 mg, 0.15 mmol) and DMAP (34 mg, 0.28 mmol) was subjected to general amine coupling procedure with DMF (1 mL). After purification by Prep-HPLC, the product was subjected to general N-Boc deprotection procedure with HCl (4M in dioxane, 100  $\mu$ L) and DCM (2 mL). The purification by Prep-HPLC afforded the product **55** (45 mg, yield 85% for 2 steps) as a white solid:  $[\alpha]_{546}^{25} = -29.2$  (c 0.5, MeOH);  $^1H$  NMR (400 MHz, Methanol- $d_4$ )  $\delta$  8.41 (s, 1H), 7.98 (dt,  $J$  = 8.1, 0.9 Hz, 1H), 7.94 – 7.86 (m, 1H), 7.53 (d,  $J$  = 1.0 Hz, 1H), 7.47 – 7.33 (m, 2H), 7.11 (d,  $J$  = 8.4 Hz, 1H), 6.80 (dd,  $J$  = 8.4, 2.7 Hz, 1H), 6.70 (d,  $J$  = 2.7 Hz, 1H), 5.73 – 5.63 (m, 1H), 4.46 (p,  $J$  = 7.2 Hz, 1H), 4.18 (dd,  $J$  = 10.9, 7.7 Hz, 2H), 4.05 (dd,  $J$  = 11.1, 7.0 Hz, 2H), 2.82 (s, 3H), 2.24 (s, 3H), 1.72 (d,  $J$  = 6.9 Hz, 3H);  $^{13}C$  NMR (100 MHz, Methanol- $d_4$ )  $\delta$  172.08, 148.38, 142.09, 139.24, 139.19, 138.76, 132.63, 128.53, 125.62, 125.13, 123.91, 123.51, 123.09, 119.68, 116.92, 53.30, 51.96, 44.61, 37.00, 20.55, 18.67; HRMS (ESI) calcd for  $C_{22}H_{26}N_3OS$   $[M+H]^+$  380.1791, found 380.1791.

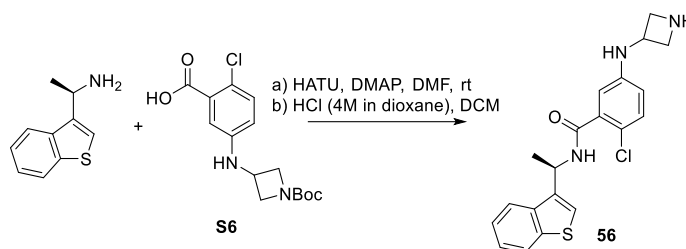

**(R)-5-(azetidin-3-ylamino)-N-(1-(benzo[b]thiophen-3-yl)ethyl)-2-chlorobenzamide (56).** (R)-1-(benzo[b]thiophen-3-yl)ethan-1-amine (41 mg, 0.23 mmol), 5-((1-(tert-butoxycarbonyl)azetidin-3-yl)amino)-2-chlorobenzoic acid (**S6**) (50 mg, 0.15 mmol), HATU (70 mg, 0.18 mmol) and DMAP (56 mg, 0.46 mmol) was subjected to general amine coupling procedure with DMF (2 mL). After purification by Prep-HPLC, the product was subjected to general N-Boc deprotection procedure with HCl (4M in dioxane, 200  $\mu$ L) and DCM (4 mL). The purification by Prep-HPLC afforded the product **56** (39 mg, yield 68% for 2 steps) as a white solid:  $[\alpha]_{546}^{25} = -24.6$  (c 1.7, MeOH);  $^1\text{H}$  NMR (400 MHz, Methanol- $d_4$ )  $\delta$  8.49 (s, 1H), 8.00 – 7.95 (m, 1H), 7.90 – 7.85 (m, 1H), 7.54 (d,  $J = 1.1$  Hz, 1H), 7.44 – 7.34 (m, 2H), 7.18 (d,  $J = 8.7$  Hz, 1H), 6.60 (dd,  $J = 8.7, 2.8$  Hz, 1H), 6.54 (d,  $J = 2.8$  Hz, 1H), 5.68 – 5.61 (m, 1H), 4.48 – 4.40 (m, 1H), 4.36 – 4.27 (m, 2H), 3.95 – 3.86 (m, 2H), 1.71 (d,  $J = 6.9$  Hz, 3H);  $^{13}\text{C}$  NMR (100 MHz, Methanol- $d_4$ )  $\delta$  169.63, 146.53, 142.03, 139.13, 139.02, 138.17, 131.68, 125.58, 125.13, 123.80, 123.48, 123.17, 120.13, 116.28, 113.73, 54.66, 46.49, 44.88, 20.54; HRMS (ESI) calcd for  $\text{C}_{20}\text{H}_{21}\text{ClN}_3\text{OS}$   $[\text{M}+\text{H}]^+$  386.1088, found 386.1094.

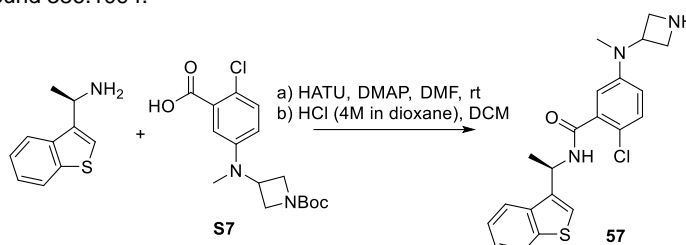

**(R)-5-(azetidin-3-yl(methyl)amino)-N-(1-(benzo[b]thiophen-3-yl)ethyl)-2-chlorobenzamide (57).** (R)-1-(benzo[b]thiophen-3-yl)ethan-1-amine (41 mg, 0.23 mmol), 5-((1-(tert-butoxycarbonyl)azetidin-3-yl(methyl)amino)-2-chlorobenzoic acid (**S7**) (51 mg, 0.15 mmol), HATU (70 mg, 0.18 mmol) and DMAP (56 mg, 0.46 mmol) was subjected to general amine coupling procedure with DMF (2 mL). After purification by Prep-HPLC, the product was subjected to general N-Boc deprotection procedure with HCl (4M in dioxane, 200  $\mu$ L) and DCM (4 mL). The purification by Prep-HPLC afforded the **57** (44 mg, yield 74% for 2 steps) as a white solid:  $[\alpha]_{546}^{25} = -24.7$  (c 1.4, MeOH);  $^1\text{H}$  NMR (400 MHz, Methanol- $d_4$ )  $\delta$  8.47 (s, 1H), 8.00 – 7.96 (m, 1H), 7.90 – 7.86 (m, 1H), 7.55 (d,  $J = 1.0$  Hz, 1H), 7.44 – 7.34 (m, 2H), 7.28 (d,  $J = 8.8$  Hz, 1H), 6.84 (dd,  $J = 8.8, 3.0$  Hz, 1H), 6.75 (d,  $J = 3.0$  Hz, 1H), 5.68 – 5.62 (m, 1H), 4.66 – 4.58 (m, 1H), 4.24 – 4.08 (m, 4H), 2.89 (s, 3H), 1.72 (d,  $J = 6.9$  Hz, 3H);  $^{13}\text{C}$  NMR (100 MHz, Methanol- $d_4$ )  $\delta$  169.30, 149.29, 142.06, 139.11, 138.98, 138.07, 131.64, 125.60, 125.11, 123.84, 123.55, 123.19, 122.23, 119.47, 116.93, 52.67, 51.92, 45.00, 35.61, 20.55; HRMS (ESI) calcd for  $\text{C}_{21}\text{H}_{23}\text{ClN}_3\text{OS}$   $[\text{M}+\text{H}]^+$  400.1245, found 400.1252.

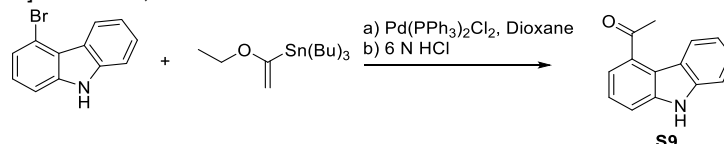

**1-(9H-carbazol-4-yl)ethan-1-one (S9).** A mixture of the 4-bromo-9H-carbazole (738 mg, 3.0 mmol),  $\text{Pd}(\text{PPh}_3)_2\text{Cl}_2$  (105 mg, 0.15 mmol) in anhyd dioxane (4 mL) was placed under argon, and tributyl(1-ethoxyvinyl)tin (1.1 mL, 3.3 mmol) was introduced by a syringe. After heating at 90  $^\circ\text{C}$  for 6 h, 6 N aq HCl (10 mL) was added to quench the reaction. The solution was refluxed for 1 h, neutralized with  $\text{NaHCO}_3$  and extracted with EtOAc (3x15 mL). The combined extracts were dried ( $\text{Na}_2\text{SO}_4$ ) and concentrated under reduced pressure. To the residue was added sat. KF–MeOH (5 mL), and the mixture was filtered. After removal of the solvent, the residue was chromatographed on Silica Gel to provide the 1-(9H-carbazol-4-yl)ethan-1-one (502 mg, 80%) as a white solid:  $^1\text{H}$  NMR (400 MHz,  $\text{CDCl}_3$ )  $\delta$  8.81 – 8.73 (m, 1H), 8.50 (s, 1H), 7.66 (dd,  $J = 7.6, 1.0$  Hz, 1H), 7.57 (dd,  $J = 8.1, 1.0$  Hz, 1H), 7.48 – 7.37 (m, 3H), 7.25 – 7.20 (m, 1H), 2.80 (s, 3H); LRMS (ESI) calcd for  $\text{C}_{14}\text{H}_{12}\text{NO}$   $[\text{M}+\text{H}]^+$  210.1, found 210.1.

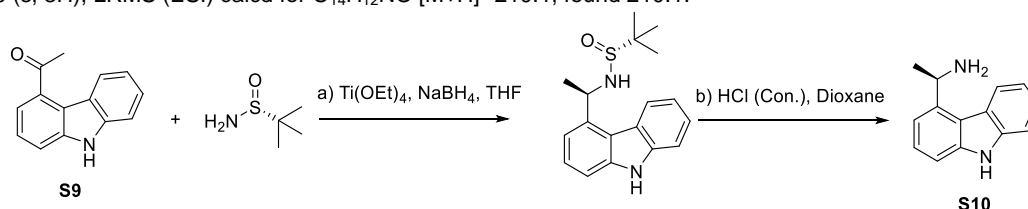

**(R)-1-(9H-carbazol-4-yl)ethan-1-amine (S10).** To a solution of  $\text{Ti}(\text{OEt})_4$  (0.3 mL, 1.44 mmol) and 1-(9H-carbazol-4-yl)ethan-1-one (**S9**) (183 mg, 0.87 mmol) in THF (5 mL) under an Ar atmosphere was added (R)-2-methylpropane-2-sulfonamide (127 mg, 1.04 mmol) and the mixture was heated (70  $^\circ\text{C}$ ). Upon completion, as determined by TLC, the mixture was cooled to  $-78$   $^\circ\text{C}$  and  $\text{NaBH}_4$  (109 mg, 2.88 mmol) was added carefully. The mixture was stirred at  $-78$   $^\circ\text{C}$  for 3 h, and then warmed up to room temperature slowly. After another 3 h, MeOH was added dropwise until gas was no longer evolved. The resulting suspension was filtered through a plug of Celite and the filter cake was washed with brine, and the brine layer was extracted with EtOAc. The



combined organic portions were dried ( $\text{Na}_2\text{SO}_4$ ), filtered, and concentrated. Use silica gel column chromatography (Hexanes/EtOAc) to get the major product (178 mg, yield 65%) as a syrup:  $^1\text{H}$  NMR (400 MHz,  $\text{CDCl}_3$ )  $\delta$  8.25 (d,  $J = 8.1$  Hz, 1H), 7.44 – 7.15 (m, 6H), 4.14 (q,  $J = 7.1$  Hz, 1H), 1.78 (d,  $J = 7.1$  Hz, 3H), 1.26 (s, 9H); LRMS (ESI) calcd for  $\text{C}_{18}\text{H}_{23}\text{N}_2\text{OS}$   $[\text{M}+\text{H}]^+$  315.2, found 315.1.

The product from the previous step was soluble in dioxane (5 mL) and then concentrated HCl aq. (100  $\mu\text{L}$ ) was added. The mixture was stirred at room temperature for 10 min. After the filtration, the compound was generated as a white solid: LRMS (ESI) calcd for  $\text{C}_{14}\text{H}_{15}\text{N}_2$   $[\text{M}+\text{H}]^+$  211.1, found 211.1.

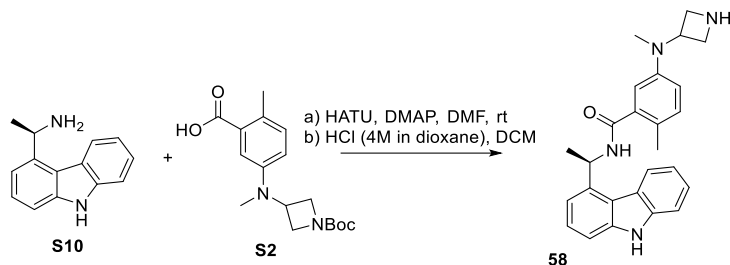

**(R)-N-(1-(9H-carbazol-4-yl)ethyl)-5-(azetidin-3-yl(methyl)amino)-2-methylbenzamide (58).** (R)-1-(9H-carbazol-4-yl)ethan-1-amine (32 mg, 0.15 mmol), 5-((1-(tert-butoxycarbonyl)azetidin-3-yl)(methyl)amino)-2-methylbenzoic acid (**S2**) (48 mg, 0.15 mmol), HATU (70 mg, 0.18 mmol) and DMAP (56 mg, 0.46 mmol) was subjected to general amine coupling procedure with DMF (2 mL). After purification by Prep-HPLC, the product was subjected to general N-Boc deprotection procedure with HCl (4M in dioxane, 200  $\mu\text{L}$ ) and DCM (4 mL). The purification by Prep-HPLC afforded the product **58** (53 mg, yield 86% for 2 steps) as a white solid:  $[\alpha]_{\text{D}}^{25} = -42.7$  (c 0.8, MeOH);  $^1\text{H}$  NMR (400 MHz, Methanol- $d_4$ )  $\delta$  8.37 (s, 1H), 8.24 (d,  $J = 8.1$  Hz, 1H), 7.51 (d,  $J = 8.2$  Hz, 1H), 7.44 – 7.37 (m, 3H), 7.30 – 7.27 (m, 1H), 7.23 – 7.18 (m, 1H), 7.12 (d,  $J = 8.3$  Hz, 1H), 6.79 (dd,  $J = 8.3, 2.8$  Hz, 1H), 6.66 (d,  $J = 2.8$  Hz, 1H), 6.14 (q,  $J = 6.8$  Hz, 1H), 4.39 – 4.30 (m, 1H), 4.12 – 3.94 (m, 4H), 2.77 (s, 3H), 2.30 (s, 3H), 1.79 (d,  $J = 6.8$  Hz, 3H);  $^{13}\text{C}$  NMR (100 MHz, Methanol- $d_4$ )  $\delta$  172.53, 148.29, 141.94, 141.69, 138.86, 132.61, 128.78, 126.54, 126.29, 123.87, 123.43, 121.45, 119.94, 119.83, 117.10, 116.24, 111.85, 111.10, 53.35, 51.94, 48.25, 37.12, 20.53, 18.69; HRMS (ESI) calcd for  $\text{C}_{26}\text{H}_{29}\text{N}_4\text{O}$   $[\text{M}+\text{H}]^+$  413.2336, found 413.2341.

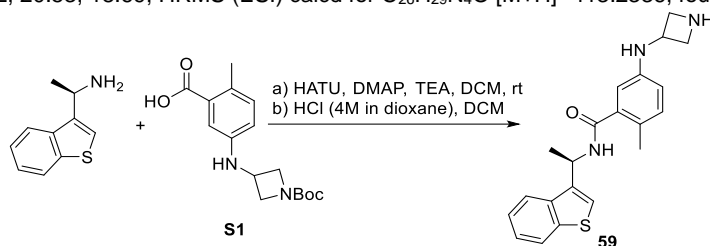

**(R)-5-(azetidin-3-ylamino)-N-(1-(benzo[b]thiophen-3-yl)ethyl)-2-methylbenzamide (59).** (R)-1-(benzo[b]thiophen-3-yl)ethan-1-amine (41 mg, 0.23 mmol), 5-((1-(tert-butoxycarbonyl)azetidin-3-yl)amino)-2-methylbenzoic acid (**S1**) (46 mg, 0.15 mmol), HATU (70 mg, 0.18 mmol) and DMAP (56 mg, 0.46 mmol) was subjected to general amine coupling procedure with DMF (2 mL). After purification by Prep-HPLC, the product was subjected to general N-Boc deprotection procedure with HCl (4M in dioxane, 200  $\mu\text{L}$ ) and DCM (4 mL). The purification by Prep-HPLC afforded the product **59** (46 mg, yield 84% for 2 steps) as a white solid:  $[\alpha]_{\text{D}}^{25} = -31.7$  (c 2.0, MeOH);  $^1\text{H}$  NMR (400 MHz, Methanol- $d_4$ )  $\delta$  8.48 (s, 1H), 7.99 – 7.94 (m, 1H), 7.90 – 7.85 (m, 1H), 7.52 (s, 1H), 7.44 – 7.33 (m, 2H), 7.00 (d,  $J = 8.3$  Hz, 1H), 6.54 (dd,  $J = 8.3, 2.6$  Hz, 1H), 6.48 (d,  $J = 2.6$  Hz, 1H), 5.66 (q,  $J = 6.9$  Hz, 1H), 4.42 (p,  $J = 7.0$  Hz, 1H), 4.31 – 4.23 (m, 2H), 3.93 – 3.84 (m, 2H), 2.21 (s, 3H), 1.70 (d,  $J = 6.9$  Hz, 3H);  $^{13}\text{C}$  NMR (100 MHz, Methanol- $d_4$ )  $\delta$  172.33, 145.38, 142.04, 139.31, 139.19, 138.71, 132.62, 125.76, 125.59, 125.13, 123.86, 123.41, 123.07, 115.58, 112.80, 54.76, 46.79, 44.50, 20.58, 18.61; HRMS (ESI) calcd for  $\text{C}_{21}\text{H}_{24}\text{N}_3\text{OS}$   $[\text{M}+\text{H}]^+$  366.1635, found 366.1640.

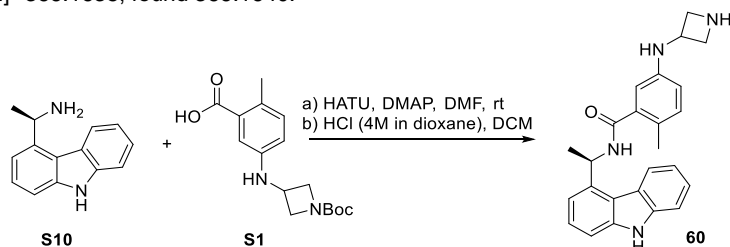

**(R)-N-(1-(9H-carbazol-4-yl)ethyl)-5-(azetidin-3-ylamino)-2-methylbenzamide (60).** (R)-1-(9H-carbazol-4-yl)ethan-1-amine (32 mg, 0.15 mmol), 5-((1-(tert-butoxycarbonyl)azetidin-3-yl)amino)-2-methylbenzoic acid (**S1**) (46 mg, 0.15 mmol), HATU (70 mg, 0.18 mmol) and DMAP (56 mg, 0.46 mmol) was subjected to general amine coupling procedure with DMF (2 mL). After purification by Prep-HPLC, the product was subjected to general N-Boc deprotection procedure with HCl (4M in dioxane, 200  $\mu\text{L}$ ) and DCM (4 mL). The purification by Prep-HPLC afforded the product **60** (47 mg, yield 78% for 2 steps) as a white solid:  $^1\text{H}$  NMR (400 MHz, Methanol- $d_4$ )  $\delta$  8.53 (s, 2H), 8.24 (d,  $J = 8.2$  Hz, 1H), 7.53 – 7.48 (m, 1H), 7.44 – 7.36 (m, 3H), 7.30 – 7.26 (m, 1H), 7.23 – 7.17 (m, 1H), 7.02 (d,  $J = 8.2$  Hz, 1H), 6.55 (dd,  $J = 8.4, 2.8$  Hz, 1H), 6.48 – 6.43 (m, 1H), 6.15 (q,  $J = 6.5$  Hz, 1H), 4.39 – 4.30 (m, 1H), 4.25 – 4.15 (m, 2H), 3.88 – 3.80 (m, 2H), 2.27 (s, 3H), 1.77 (d,  $J = 6.8$  Hz, 3H);  $^{13}\text{C}$  NMR (100 MHz, Methanol- $d_4$ )  $\delta$  172.78, 145.33, 141.93, 141.70, 139.03, 138.91, 132.62, 126.52, 126.28, 126.07, 123.89, 123.46, 121.44, 119.96, 116.18, 115.84, 112.78, 111.81, 111.02, 54.83, 48.14, 46.97, 20.68, 18.62; HRMS (ESI) calcd for  $\text{C}_{25}\text{H}_{27}\text{N}_4\text{O}$   $[\text{M}+\text{H}]^+$  399.2179, found 399.2176.

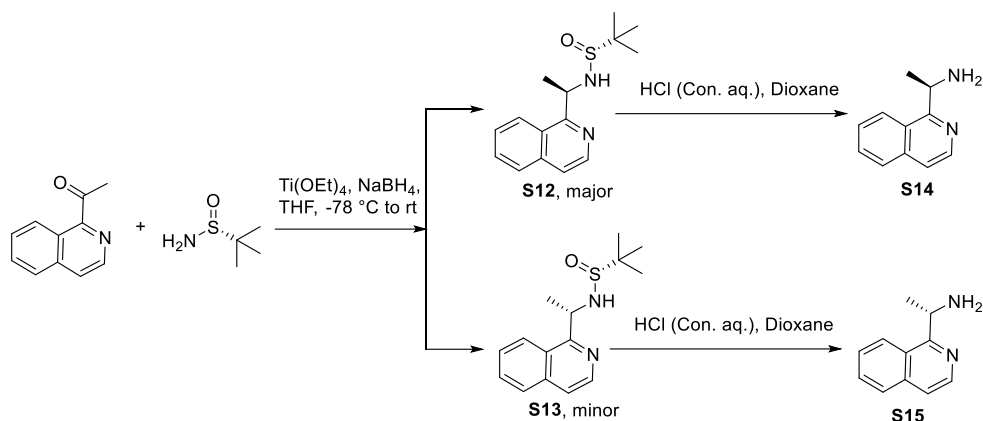

**(R)-N-((R/S)-1-(isoquinolin-1-yl)ethyl)-2-methylpropane-2-sulfonamide<sup>2</sup>.** To a solution of  $\text{Ti}(\text{OEt})_4$  (0.3 mL, 1.44 mmol) and 1-(isoquinolin-1-yl)ethan-1-one (171 mg, 1.00 mmol) in THF (5 mL) under an Ar atmosphere was added (R)-2-methylpropane-2-sulfonamide (182 mg, 1.50 mmol) and the mixture was heated (70 °C). Upon completion, as determined by TLC, the mixture was cooled to -78 °C and  $\text{NaBH}_4$  (113 mg, 3.00 mmol) was added carefully. The mixture was stirred at -78 °C for 3 h, and then warmed up to room temperature slowly. After another 3 h, MeOH was added dropwise until gas was no longer evolved. The resulting suspension was filtered through a plug of Celite and the filter cake was washed with EtOAc. The filtrate was washed with brine, and the brine layer was extracted with EtOAc. The combined organic portions were dried ( $\text{Na}_2\text{SO}_4$ ), filtered, and concentrated. Use silica gel column chromatography (Hexanes/EtOAc) to get the products (**S12**, 199 mg, yield 72%; **S13**, 54 mg, yield 20%) as colorless syrup:

**S12:**  $^1\text{H}$  NMR (400 MHz, Chloroform-*d*)  $\delta$  8.40 (d,  $J = 5.7$  Hz, 1H), 8.08 (dd,  $J = 8.6, 1.3$  Hz, 1H), 7.80 – 7.73 (m, 1H), 7.65 – 7.53 (m, 2H), 7.51 – 7.48 (m, 1H), 5.64 (d,  $J = 5.7$  Hz, 1H), 5.38 (dt,  $J = 12.5, 6.6$  Hz, 1H), 1.53 (d,  $J = 6.7$  Hz, 3H), 1.28 (s, 9H); LRMS (ESI) calcd for  $\text{C}_{15}\text{H}_{21}\text{N}_2\text{OS}$   $[\text{M}+\text{H}]^+$  227.14, found 227.11.

**S13:**  $^1\text{H}$  NMR (400 MHz, Chloroform-*d*)  $\delta$  8.45 (d,  $J = 5.7$  Hz, 1H), 8.12 (d,  $J = 8.4$  Hz, 1H), 7.82 (d,  $J = 8.1$  Hz, 1H), 7.69 – 7.58 (m, 2H), 7.55 (d,  $J = 5.7$  Hz, 1H), 5.41 (dq,  $J = 9.0, 6.7$  Hz, 1H), 4.88 (d,  $J = 9.0$  Hz, 1H), 1.73 (d,  $J = 6.7$  Hz, 3H), 1.18 (s, 9H); LRMS (ESI) calcd for  $\text{C}_{15}\text{H}_{21}\text{N}_2\text{OS}$   $[\text{M}+\text{H}]^+$  227.14, found 227.15.

**(R/S)-1-(isoquinolin-1-yl)ethan-1-amine.** **S12** and **S13** were soluble separately in Dioxane (5 mL) and then concentrated HCl aq. (100  $\mu\text{L}$ ) was added. The reactions were stirred at room temperature for 10 min. After the filtration and washed with cold EtOAc, the compounds were generated as wight solids.

**S14:**  $^1\text{H}$  NMR (400 MHz, Chloroform-*d*)  $\delta$  8.47 (d,  $J = 5.7$  Hz, 1H), 8.21 – 8.13 (m, 1H), 7.88 – 7.80 (m, 1H), 7.70 – 7.59 (m, 2H), 7.55 (d,  $J = 5.7$  Hz, 1H), 5.03 (q,  $J = 6.7$  Hz, 1H), 1.56 (d,  $J = 6.7$  Hz, 3H); LRMS (ESI) calcd for  $\text{C}_{11}\text{H}_{13}\text{N}_2$   $[\text{M}+\text{H}]^+$  173.1, found 173.1.

**S15:**  $^1\text{H}$  NMR (400 MHz, Chloroform-*d*)  $\delta$  8.47 (d,  $J = 5.6$  Hz, 1H), 8.22 – 8.12 (m, 1H), 7.90 – 7.80 (m, 1H), 7.70 – 7.58 (m, 2H), 7.55 (d,  $J = 5.7$  Hz, 1H), 5.01 (q,  $J = 6.7$  Hz, 1H), 1.56 (d,  $J = 6.7$  Hz, 3H); LRMS (ESI) calcd for  $\text{C}_{11}\text{H}_{13}\text{N}_2$   $[\text{M}+\text{H}]^+$  173.1, found 173.1.

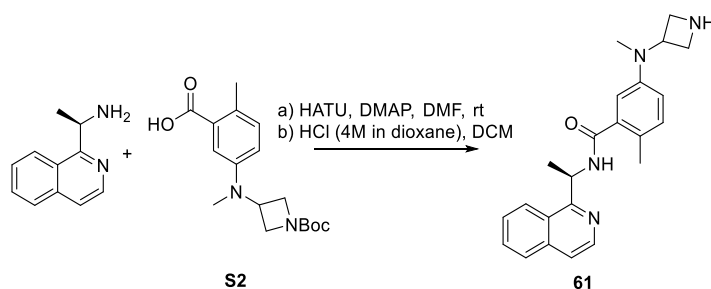

**(R)-5-(azetidin-3-yl(methyl)amino)-N-(1-(isoquinolin-1-yl)ethyl)-2-methylbenzamide (61).** (R)-1-(isoquinolin-1-yl)ethan-1-amine (35 mg, 0.20 mmol), 5-((1-(tert-butoxycarbonyl)azetidin-3-yl)(methyl)amino)-2-methylbenzoic acid (**S2**) (96 mg, 0.30 mmol), HATU (114 mg, 0.30 mmol) and DMAP (110 mg, 0.90 mmol) was subjected to general amine coupling procedure with DMF (1.5 mL). After purification by Prep-HPLC, the product was subjected to general N-Boc deprotection procedure with HCl (4M in dioxane, 200  $\mu\text{L}$ ) and DCM (4 mL). The purification by Prep-HPLC afforded the product **61** (63 mg, yield 84% for 2 steps) as a white solid:  $[\alpha]_{\text{D}}^{25} = -49.6$  (c 0.8, MeOH);  $^1\text{H}$  NMR (400 MHz, Methanol-*d*<sub>4</sub>)  $\delta$  8.54 (s, 1H), 8.47 – 8.40 (m, 2H), 8.01 – 7.94 (m, 1H), 7.82 – 7.71 (m, 3H), 7.14 (d,  $J = 8.0$  Hz, 1H), 6.88 – 6.81 (m, 2H), 6.17 (q,  $J = 6.9$  Hz, 1H), 4.56 – 4.46 (m, 1H), 4.26 – 4.19 (m, 2H), 4.11 – 4.04 (m, 2H), 2.87 (s, 3H), 2.28 (s, 3H), 1.69 (d,  $J = 6.8$  Hz, 3H);  $^{13}\text{C}$  NMR (100 MHz, Methanol-*d*<sub>4</sub>)  $\delta$  171.96, 161.77, 148.51, 142.19, 138.47, 138.16, 132.77, 131.71, 128.97, 128.75, 126.89, 125.55, 121.88, 119.91, 117.01, 53.46, 52.13, 48.09, 37.09, 21.35, 18.78; HRMS (ESI) calcd for  $\text{C}_{23}\text{H}_{27}\text{N}_4\text{O}$   $[\text{M}+\text{H}]^+$  375.2179, found 375.2183.

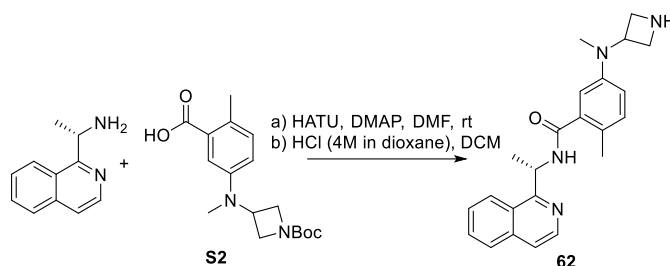

**(S)-5-(azetid-3-yl(methyl)amino)-N-(1-(isoquinolin-1-yl)ethyl)-2-methylbenzamide (62).** (S)-1-(isoquinolin-1-yl)ethan-1-amine (10 mg, 0.06 mmol), 5-((1-(tert-butoxycarbonyl)azetid-3-yl)(methyl)amino)-2-methylbenzoic acid (**S2**) (29 mg, 0.09 mmol), HATU (34 mg, 0.09 mmol) and DMAP (33 mg, 0.27 mmol) was subjected to general amine coupling procedure with DMF (1 mL). After purification by Prep-HPLC, the product was subjected to general N-Boc deprotection procedure with HCl (4M in dioxane, 100  $\mu$ L) and DCM (2 mL). The purification by Prep-HPLC afforded the product **62** (16 mg, yield 71% for 2 steps) as a white solid:  $[\alpha]_{546}^{25} = +40.7$  (c 0.4, MeOH);  $^1\text{H}$  NMR (400 MHz, Methanol- $d_4$ )  $\delta$  8.51 (s, 1H), 8.44 (t,  $J = 7.5$  Hz, 2H), 7.99 – 7.95 (m, 1H), 7.83 – 7.71 (m, 3H), 7.13 (dd,  $J = 10.6, 8.1$  Hz, 1H), 6.87 – 6.81 (m, 2H), 6.20 – 6.12 (m, 1H), 4.56 – 4.46 (m, 1H), 4.29 – 4.21 (m, 2H), 4.08 (dd,  $J = 11.2, 7.1$  Hz, 2H), 2.87 (s, 3H), 2.28 (s, 3H), 1.69 (d,  $J = 6.9$  Hz, 3H);  $^{13}\text{C}$  NMR (100 MHz, Methanol- $d_4$ ) 171.90, 161.77, 148.51, 142.18, 138.47, 138.16, 132.78, 131.72, 128.98, 128.76, 125.55, 121.89, 119.96, 117.06, 53.40, 52.13, 48.08, 37.13, 21.36, 18.78; HRMS (ESI) calcd for  $\text{C}_{23}\text{H}_{27}\text{N}_4\text{O}$   $[\text{M}+\text{H}]^+$  375.2179, found 375.2185.

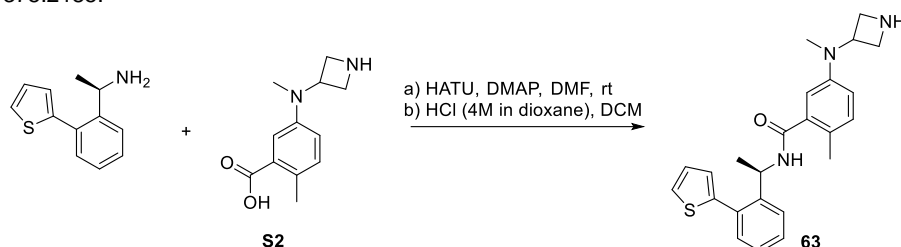

**(R)-5-(azetid-3-yl(methyl)amino)-2-methyl-N-(1-(2-(thiophen-2-yl)phenyl)ethyl)benzamide (63).** (R)-1-(2-(thiophen-2-yl)phenyl)ethan-1-amine (30 mg, 0.15 mmol), 5-(azetid-3-yl(methyl)amino)-2-methylbenzoic acid (**S2**) (33 mg, 0.15 mmol), HATU (70 mg, 0.18 mmol) and DMAP (56 mg, 0.46 mmol) was subjected to general amine coupling procedure with DMF (2 mL). After purification by Prep-HPLC, the product was subjected to general N-Boc deprotection procedure with HCl (4M in dioxane, 100  $\mu$ L) and DCM (2 mL). The purification by Prep-HPLC afforded the **63** (50 mg, yield 82% for 2 steps) as a white solid:  $^1\text{H}$  NMR (400 MHz, Acetone- $d_6$ )  $\delta$  7.79 – 7.71 (m, 1H), 7.55 (dd,  $J = 5.2, 1.2$  Hz, 1H), 7.46 – 7.27 (m, 4H), 7.18 (dd,  $J = 5.2, 3.4$  Hz, 1H), 7.02 (d,  $J = 8.4$  Hz, 1H), 6.77 (d,  $J = 2.7$  Hz, 1H), 6.72 (dd,  $J = 8.3, 2.8$  Hz, 1H), 5.65 – 5.55 (m, 1H), 3.99 (p,  $J = 6.7$  Hz, 1H), 3.65 – 3.55 (m, 2H), 3.39 – 3.24 (m, 2H), 2.81 (s, 3H), 2.21 (s, 3H), 1.43 (d,  $J = 7.0$  Hz, 3H);  $^{13}\text{C}$  NMR (100 MHz, Acetone- $d_6$ )  $\delta$  162.86, 148.98, 144.94, 142.60, 138.59, 133.94, 131.91, 129.41, 128.15, 128.06, 127.52, 126.81, 126.64, 126.27, 117.24, 115.29, 52.57, 52.52, 50.31, 46.80, 36.49, 23.20, 18.79; HRMS (ESI) calcd for  $\text{C}_{24}\text{H}_{28}\text{N}_3\text{OS}$   $[\text{M}+\text{H}]^+$  406.1948, found 406.1953

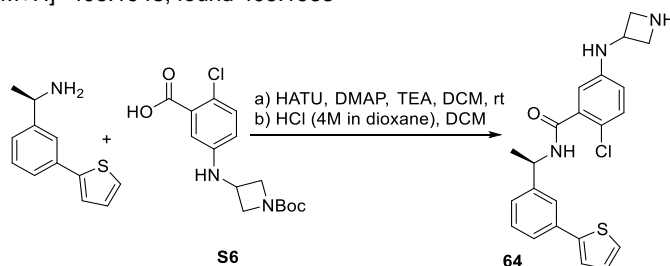

**(R)-5-(azetid-3-ylamino)-2-chloro-N-(1-(3-(thiophen-2-yl)phenyl)ethyl)benzamide (64).** (R)-1-(3-(thiophen-2-yl)phenyl)ethan-1-amine (30 mg, 0.15 mmol), 5-((1-(tert-butoxycarbonyl)azetid-3-yl)amino)-2-chlorobenzoic acid (**S6**) (50 mg, 0.15 mmol), HATU (70 mg, 0.18 mmol) and DMAP (56 mg, 0.46 mmol) was subjected to general amine coupling procedure with DMF (2 mL). After purification by Prep-HPLC, the product was subjected to general N-Boc deprotection procedure with HCl (4M in dioxane, 200  $\mu$ L) and DCM (4 mL). The purification by Prep-HPLC afforded the **64** (48 mg, yield 77% for 2 steps) as a white solid:  $[\alpha]_{546}^{25} = +58.5$  (c 1.5, MeOH);  $^1\text{H}$  NMR (400 MHz, Methanol- $d_4$ )  $\delta$  8.42 (s, 1H), 7.73 – 7.70 (m, 1H), 7.55 – 7.51 (m, 1H), 7.41 – 7.32 (m, 4H), 7.20 (d,  $J = 8.5$  Hz, 1H), 7.08 (dd,  $J = 5.1, 3.6$  Hz, 1H), 6.64 – 6.58 (m, 2H), 5.21 (q,  $J = 7.0$  Hz, 1H), 4.51 – 4.43 (m, 1H), 4.36 – 4.30 (m, 2H), 3.95 – 3.89 (m, 2H), 1.56 (d,  $J = 7.1$  Hz, 3H);  $^{13}\text{C}$  NMR (100 MHz, Methanol- $d_4$ )  $\delta$  169.47, 146.59, 145.89, 145.40, 138.26, 135.99, 131.68, 130.17, 129.10, 126.43, 125.91, 125.52, 124.65, 124.35, 120.11, 116.39, 113.71, 54.62, 50.74, 46.50, 22.41; HRMS (ESI) calcd for  $\text{C}_{22}\text{H}_{23}\text{ClN}_3\text{OS}$   $[\text{M}+\text{H}]^+$  412.1245, found 412.1250.

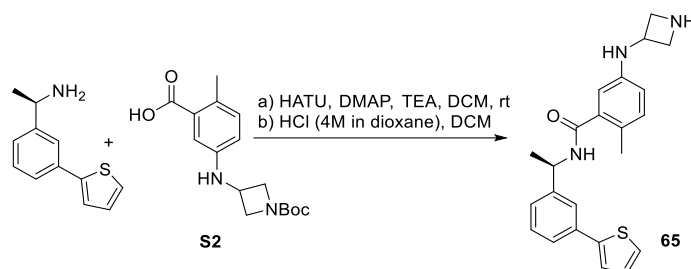

**(R)-5-(azetidin-3-ylamino)-2-methyl-N-(1-(3-(thiophen-2-yl)phenyl)ethyl)benzamide (65).** (R)-1-(3-(thiophen-2-yl)phenyl)ethan-1-amine (30 mg, 0.15 mmol), 5-((1-(tert-butoxycarbonyl)azetidin-3-yl)amino)-2-methylbenzoic acid (**S2**) (46 mg, 0.15 mmol), HATU (70 mg, 0.18 mmol) and DMAP (56 mg, 0.46 mmol) was subjected to general amine coupling procedure with DMF (2 mL). After purification by Prep-HPLC, the product was subjected to general N-Boc deprotection procedure with HCl (4M in dioxane, 200  $\mu$ L) and DCM (4 mL). The purification by Prep-HPLC afforded the product **65** (47 mg, yield 80% for 2 steps) as a white solid:  $[\alpha]_{546}^{25} = +25.2$  (c 0.8, MeOH);  $^1\text{H}$  NMR (400 MHz, Methanol- $d_4$ )  $\delta$  8.51 (s, 1H), 7.70 – 7.68 (m, 1H), 7.56 – 7.51 (m, 1H), 7.41 – 7.31 (m, 4H), 7.09 (dd,  $J = 5.1, 3.6$  Hz, 1H), 7.03 (d,  $J = 8.2$  Hz, 1H), 6.60 – 6.52 (m, 2H), 5.22 (q,  $J = 7.0$  Hz, 1H), 4.48 (p,  $J = 7.0$  Hz, 1H), 4.38 – 4.29 (m, 2H), 3.95 – 3.88 (m, 2H), 2.22 (s, 3H), 1.55 (d,  $J = 7.1$  Hz, 3H);  $^{13}\text{C}$  NMR (100 MHz, Methanol- $d_4$ )  $\delta$  172.56, 146.28, 145.45, 145.41, 138.93, 136.04, 132.62, 130.23, 129.12, 126.38, 125.93, 125.71, 125.51, 124.62, 124.34, 115.64, 112.68, 54.85, 50.51, 46.86, 22.39, 18.62; HRMS (ESI) calcd for  $\text{C}_{23}\text{H}_{26}\text{N}_3\text{OS}$   $[\text{M}+\text{H}]^+$  392.1791, found 392.1790.

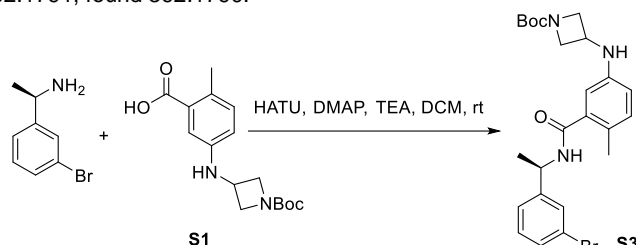

**Tert-butyl (R)-3-((1-(3-bromophenyl)ethyl)carbamoyl)-4-methylphenylamino)azetidine-1-carboxylate (S3).** (R)-1-(3-bromophenyl)ethan-1-amine (200 mg, 1.00 mmol), 5-((1-(tert-butoxycarbonyl)azetidin-3-yl)amino)-2-methylbenzoic acid (**S1**) (306 mg, 1.00 mmol), HATU (380 mg, 1.00 mmol), DMAP (12 mg, 0.10 mmol), and TEA (200  $\mu$ L) was subjected to general amine coupling procedure with DMF (5 mL). The purification by Prep-HPLC afforded the **S3** (435 mg, yield 89%) as a white solid:  $^1\text{H}$  NMR (400 MHz, Chloroform- $d$ )  $\delta$  7.51 – 7.50 (m, 1H), 7.40 (ddd,  $J = 7.8, 2.0, 1.2$  Hz, 1H), 7.32 – 7.28 (m, 1H), 7.24 – 7.19 (m, 1H), 7.01 (d,  $J = 8.2$  Hz, 1H), 6.52 (d,  $J = 2.6$  Hz, 1H), 6.46 (dd,  $J = 8.2, 2.6$  Hz, 1H), 6.02 (d,  $J = 8.0$  Hz, 1H), 5.25 (p,  $J = 7.1$  Hz, 1H), 4.26 (dd,  $J = 8.7, 7.1$  Hz, 2H), 4.20 – 4.13 (m, 1H), 3.68 (dd,  $J = 9.0, 4.6$  Hz, 2H), 2.28 (s, 3H), 1.55 (d,  $J = 7.0$  Hz, 3H), 1.43 (s, 9H);  $^{13}\text{C}$  NMR (100 MHz, Chloroform- $d$ )  $\delta$  169.40, 156.30, 145.71, 144.24, 137.28, 132.17, 130.63, 130.45, 129.30, 125.28, 125.09, 122.93, 114.74, 111.81, 79.88, 48.75, 43.41, 38.74, 28.50, 21.99, 18.83; LRMS (ESI) calcd for  $\text{C}_{24}\text{H}_{31}\text{BrN}_3\text{O}_3$   $[\text{M}+\text{H}]^+$  488.2, found 488.2.

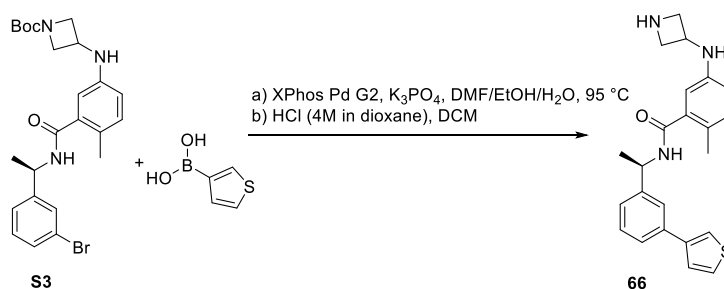

**(R)-5-(azetidin-3-ylamino)-2-methyl-N-(1-(3-(thiophen-3-yl)phenyl)ethyl)benzamide (66).** A flask fitted with a rubber septum was charged with tert-butyl (R)-3-((1-(3-bromophenyl)ethyl)carbamoyl)-4-methylphenylamino)azetidine-1-carboxylate (**S3**) (49 mg, 0.10 mmol), thiophen-3-ylboronic acid (19 mg, 0.15 mmol), XPhos Pd G2 (8 mg, 0.01 mmol),  $\text{K}_3\text{PO}_4$  (64 mg, 0.3 mmol), DMF/EtOH/ $\text{H}_2\text{O}$  (1 mL/ 1 mL/ 0.5 mL) and then purged with argon. The mixture was stirred at 95  $^\circ\text{C}$  overnight. The reaction mixture was then cooled to room temperature, diluted with ethyl acetate (20 mL), filtered through celite and concentrated in vacuo. After purification by Prep-HPLC, the product was subjected to general N-Boc deprotection procedure with HCl (4M in dioxane, 100  $\mu$ L) and DCM (2 mL). The purification by Prep-HPLC afforded the product **66** (14 mg, yield 35% for 2 steps) as a white solid:  $[\alpha]_{546}^{25} = +12.3$  (c 0.6, MeOH);  $^1\text{H}$  NMR (400 MHz, Methanol- $d_4$ )  $\delta$  8.41 (s, 1H), 7.72 – 7.69 (m, 1H), 7.63 – 7.60 (m, 1H), 7.58 – 7.53 (m, 1H), 7.50 – 7.45 (m, 2H), 7.41 – 7.31 (m, 2H), 7.02 (d,  $J = 8.2$  Hz, 1H), 6.61 – 6.50 (m, 2H), 5.23 (q,  $J = 7.0$  Hz, 1H), 4.52 – 4.42 (m, 1H), 4.35 – 4.29 (m, 2H), 3.95 – 3.88 (m, 2H), 2.21 (s, 3H), 1.56 (d,  $J = 7.0$  Hz, 3H);  $^{13}\text{C}$  NMR (100 MHz, Methanol- $d_4$ )  $\delta$  172.53, 146.00, 145.45, 143.51, 138.97, 137.47, 132.63, 130.10, 127.36, 127.17, 126.13, 125.92, 125.70, 125.29, 121.38, 115.58, 112.72, 54.84, 50.62, 46.84, 22.47, 18.57; HRMS (ESI) calcd for  $\text{C}_{23}\text{H}_{26}\text{N}_3\text{OS}$   $[\text{M}+\text{H}]^+$  392.1791, found 392.1800.

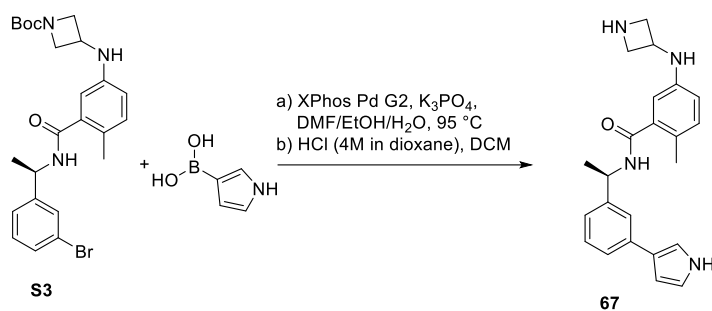

**(R)-N-(1-(3-(1H-pyrrol-3-yl)phenyl)ethyl)-5-(azetidin-3-ylamino)-2-methylbenzamide (67)**. A flask fitted with a rubber septum was charged with tert-butyl (R)-3-((3-((1-(3-bromophenyl)ethyl)carbamoyl)-4-methylphenyl)amino)azetidine-1-carboxylate (**S3**) (49 mg, 0.10 mmol), (1H-pyrrol-3-yl)boronic acid (17 mg, 0.15 mmol), XPhos Pd G2 (8 mg, 0.01 mmol),  $K_3PO_4$  (64 mg, 0.3 mmol), DMF/EtOH/ $H_2O$  (1 mL/1 mL/0.5 mL) and then purged with argon. The mixture was stirred at 95 °C overnight. The reaction mixture was then cooled to room temperature, diluted with ethyl acetate (20 mL), filtered through celite and concentrated in vacuo. After purification by Prep-HPLC, the product was subjected to general N-Boc deprotection procedure with HCl (4M in dioxane, 100  $\mu$ L) and DCM (2 mL). The purification by Prep-HPLC afforded the product **67** (15 mg, yield 41% for 2 steps) as a white solid:  $[\alpha]_{25}^{25} = +12.1$  (c 1.7, MeOH);  $^1H$  NMR (400 MHz, Methanol- $d_4$ )  $\delta$  8.44 (s, 1H), 7.59 – 7.56 (m, 1H), 7.44 – 7.40 (m, 1H), 7.29 – 7.24 (m, 1H), 7.16 – 7.10 (m, 2H), 7.02 (d,  $J = 8.3$  Hz, 1H), 6.79 – 6.76 (m, 1H), 6.56 (dd,  $J = 8.3, 2.6$  Hz, 1H), 6.51 (d,  $J = 2.6$  Hz, 1H), 6.48 – 6.44 (m, 1H), 5.19 (q,  $J = 7.0$  Hz, 1H), 4.49 – 4.39 (m, 1H), 4.33 – 4.27 (m, 2H), 3.90 (ddd,  $J = 11.4, 6.7, 2.0$  Hz, 2H), 2.22 (s, 3H), 1.54 (d,  $J = 7.1$  Hz, 3H);  $^{13}C$  NMR (100 MHz, Methanol- $d_4$ )  $\delta$  172.50, 145.42, 139.03, 138.29, 132.64, 132.61, 129.72, 125.71, 125.36, 124.64, 123.70, 119.83, 115.72, 115.69, 115.65, 112.63, 106.47, 54.83, 50.67, 46.83, 22.49, 18.58; HRMS (ESI) calcd for  $C_{23}H_{27}N_4O$   $[M+H]^+$  375.2179, found 375.2183.

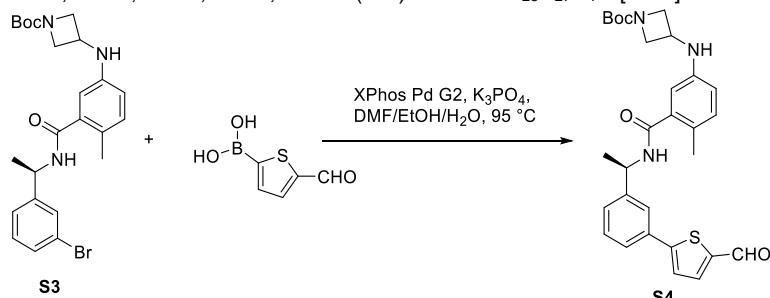

**Tert-butyl (R)-3-((3-((1-(3-(5-formylthiophen-2-yl)phenyl)ethyl)carbamoyl)-4-methylphenyl)amino)azetidine-1-carboxylate (S4)**. A flask fitted with a rubber septum was charged with tert-butyl (R)-3-((3-((1-(3-bromophenyl)ethyl)carbamoyl)-4-methylphenyl)amino)azetidine-1-carboxylate (**S3**) (490 mg, 1.00 mmol), (5-formylthiophen-2-yl)boronic acid (170 mg, 1.50 mmol), XPhos Pd G2 (40 mg, 0.05 mmol),  $K_3PO_4$  (531 mg, 2.5 mmol), DMF/EtOH/ $H_2O$  (5 mL/5 mL/2.5 mL) and then purged with argon. The mixture was stirred at 95 °C overnight. The reaction mixture was then cooled to room temperature, diluted with ethyl acetate (50 mL), filtered through celite and concentrated in vacuo. The purification by Prep-HPLC afforded the **XR8-6** (166 mg, yield 32%) as a white solid:  $^1H$  NMR (400 MHz, Chloroform- $d$ )  $\delta$  9.88 (s, 1H), 7.74 (d,  $J = 3.9$  Hz, 1H), 7.67 (s, 1H), 7.61 – 7.57 (m, 1H), 7.46 – 7.38 (m, 3H), 7.02 (d,  $J = 8.2$  Hz, 1H), 6.55 (d,  $J = 2.5$  Hz, 1H), 6.47 (dd,  $J = 8.2, 2.6$  Hz, 1H), 6.06 (d,  $J = 7.9$  Hz, 1H), 5.34 (p,  $J = 7.1$  Hz, 1H), 4.25 (ddd,  $J = 9.2, 6.9, 2.6$  Hz, 2H), 4.12 (q,  $J = 7.2$  Hz, 1H), 3.68 (dd,  $J = 8.9, 4.5$  Hz, 2H), 2.29 (s, 3H), 1.61 (d,  $J = 7.0$  Hz, 3H), 1.43 (s, 9H);  $^{13}C$  NMR (100 MHz, Chloroform- $d$ )  $\delta$  182.92, 169.49, 154.08, 144.65, 144.28, 142.72, 137.52, 137.36, 133.64, 132.20, 129.79, 127.32, 125.64, 125.22, 124.47, 124.37, 114.75, 111.84, 79.88, 49.07, 43.42, 28.51, 22.12, 18.89; LRMS (ESI) calcd for  $C_{29}H_{34}N_3O_4S$   $[M+H]^+$  520.2, found 520.3.

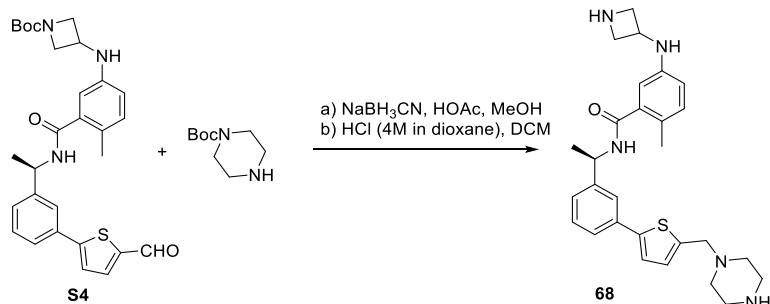

**(R)-5-(azetidin-3-ylamino)-2-methyl-N-(1-(3-(5-(piperazin-1-ylmethyl)thiophen-2-yl)phenyl)ethyl)benzamide (68)**. Tert-butyl (R)-3-((3-((1-(3-(5-formylthiophen-2-yl)phenyl)ethyl)carbamoyl)-4-methylphenyl)amino)azetidine-1-carboxylate (**S4**) (31 mg, 0.06 mmol) and tert-butyl piperazine-1-carboxylate (17 mg, 0.09 mmol) was subjected to general reductive amination procedure with MeOH (2 mL), HOAc (500  $\mu$ L) at 50 °C, and then  $NaBH_3CN$  (12 mg, 0.18 mmol) was added. After purification by Prep-HPLC, the product was subjected to general N-Boc deprotection procedure with HCl (4M in dioxane, 100  $\mu$ L) and DCM (2 mL). The purification by Prep-HPLC afforded the product **68** (20 mg, yield 68% for 2 steps) as a white solid:  $[\alpha]_{25}^{25} = -6.9$  (c 1.7, MeOH);  $^1H$  NMR (400 MHz, Methanol- $d_4$ )  $\delta$  8.34 (s, 1H), 7.67 – 7.64 (m, 1H), 7.53 – 7.48 (m, 1H), 7.41 – 7.32 (m, 2H), 7.26 (d,  $J = 3.7$  Hz, 1H), 7.03 (d,  $J = 7.9$  Hz, 1H), 6.99 – 6.97 (m, 1H), 6.61 – 6.55 (m, 2H), 5.21 (q,  $J = 7.1$  Hz, 1H), 4.56 – 4.45 (m, 1H), 4.36 (dd,  $J = 11.4, 7.4$  Hz, 2H), 3.95 (dd,  $J = 11.2, 6.7$  Hz, 2H),

3.83 (s, 2H), 3.26 – 3.21 (m, 4H), 2.80 – 2.73 (m, 4H), 2.21 (s, 3H), 1.55 (d,  $J = 7.0$  Hz, 3H);  $^{13}\text{C}$  NMR (100 MHz, Methanol- $d_4$ )  $\delta$  172.57, 146.33, 145.64, 145.47, 141.01, 138.86, 135.95, 132.64, 130.28, 129.15, 126.33, 125.73, 125.27, 124.53, 123.90, 115.59, 112.84, 57.59, 54.92, 50.54, 50.31, 46.84, 44.87, 22.36, 18.64; HRMS (ESI) calcd for  $\text{C}_{28}\text{H}_{36}\text{N}_5\text{O}_5$   $[\text{M}+\text{H}]^+$  490.2635, found 490.2632.

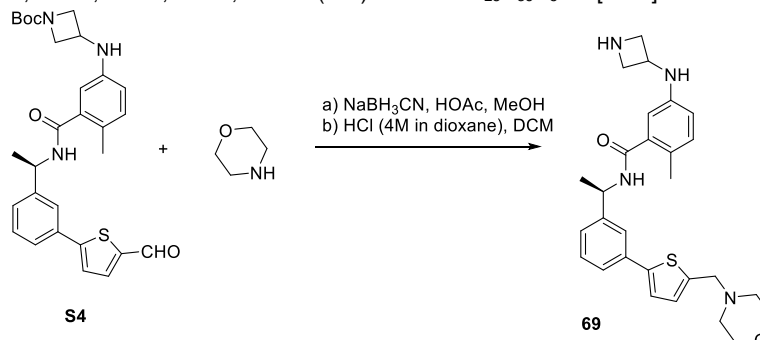

**(R)-5-(azetidin-3-ylamino)-2-methyl-N-(1-(3-(5-(morpholinomethyl)thiophen-2-yl)phenyl)ethyl)benzamide (69).** Tert-butyl (R)-3-((3-((1-(3-(5-formylthiophen-2-yl)phenyl)ethyl)carbamoyl)-4-methylphenyl)amino)azetidine-1-carboxylate (**S4**) (31 mg, 0.06 mmol) and morpholine (8 mg, 0.09 mmol) was subjected to general reductive amination procedure with MeOH (2 mL), HOAc (500  $\mu\text{L}$ ) at 50  $^\circ\text{C}$ , and then  $\text{NaBH}_3\text{CN}$  (12 mg, 0.18 mmol) was added. After purification by Prep-HPLC, the product was subjected to general N-Boc deprotection procedure with HCl (4M in dioxane, 100  $\mu\text{L}$ ) and DCM (2 mL). The purification by Prep-HPLC afforded the product **69** (19 mg, yield 65 % for 2 steps) as a white solid:  $[\alpha]_{546}^{25} = -9.6$  (c 1.2, MeOH);  $^1\text{H}$  NMR (400 MHz, Methanol- $d_4$ )  $\delta$  8.09 (s, 1H), 7.73 – 7.69 (m, 1H), 7.60 – 7.54 (m, 1H), 7.46 – 7.37 (m, 4H), 7.08 (d,  $J = 8.6$  Hz, 1H), 6.72 – 6.66 (m, 2H), 5.22 (q,  $J = 7.0$  Hz, 1H), 4.64 (s, 2H), 4.59 – 4.52 (m, 1H), 4.42 – 4.32 (m, 2H), 4.13 – 3.99 (m, 4H), 3.89 – 3.79 (m, 2H), 3.52 – 3.43 (m, 2H), 3.29 – 3.19 (m, 2H), 2.22 (s, 3H), 1.56 (d,  $J = 7.1$  Hz, 3H);  $^{13}\text{C}$  NMR (100 MHz, Methanol- $d_4$ )  $\delta$  172.36, 149.60, 146.57, 144.17, 138.73, 135.32, 134.98, 132.81, 130.51, 129.40, 127.29, 127.09, 125.68, 124.98, 124.86, 116.51, 113.87, 64.99, 55.70, 54.64, 52.49, 50.63, 47.39, 22.40, 18.71; HRMS (ESI) calcd for  $\text{C}_{28}\text{H}_{35}\text{N}_4\text{O}_2\text{S}$   $[\text{M}+\text{H}]^+$  491.2475, found 491.2475.

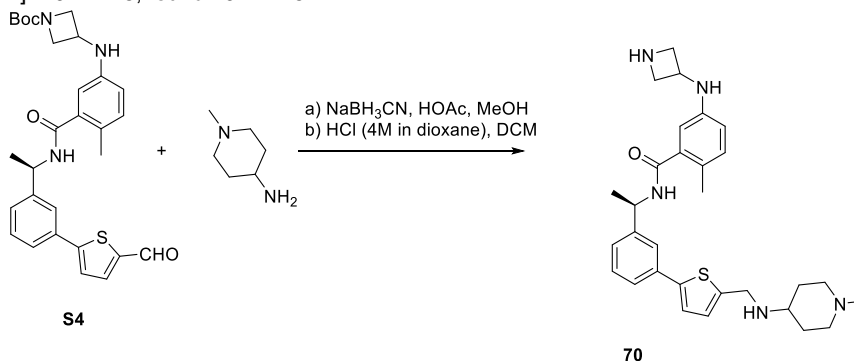

**(R)-5-(azetidin-3-ylamino)-2-methyl-N-(1-(3-(5-(((1-methylpiperidin-4-yl)amino)methyl)thiophen-2-yl)phenyl)ethyl)benzamide (70).** Tert-butyl (R)-3-((3-((1-(3-(5-formylthiophen-2-yl)phenyl)ethyl)carbamoyl)-4-methylphenyl)amino)azetidine-1-carboxylate (**S4**) (31 mg, 0.06 mmol) and 1-methylpiperidin-4-amine (10 mg, 0.09 mmol) was subjected to general reductive amination procedure with MeOH (2 mL), HOAc (500  $\mu\text{L}$ ) at 50  $^\circ\text{C}$ , and then  $\text{NaBH}_3\text{CN}$  (12 mg, 0.18 mmol) was added. After purification by Prep-HPLC, the product was subjected to general N-Boc deprotection procedure with HCl (4M in dioxane, 100  $\mu\text{L}$ ) and DCM (2 mL). The purification by Prep-HPLC afforded the product **70** (23 mg, yield 74 % for 2 steps) as a white solid:  $[\alpha]_{546}^{25} = -9.6$  (c 1.7, MeOH);  $^1\text{H}$  NMR (400 MHz, Methanol- $d_4$ )  $\delta$  8.09 (s, 1H), 7.70 (t,  $J = 1.9$  Hz, 1H), 7.56 (dt,  $J = 6.6, 2.1$  Hz, 1H), 7.46 – 7.34 (m, 4H), 7.08 – 7.01 (m, 1H), 6.65 – 6.58 (m, 2H), 5.21 (q,  $J = 7.2$  Hz, 1H), 4.62 – 4.47 (m, 3H), 4.42 – 4.33 (m, 2H), 4.05 – 3.96 (m, 2H), 3.70 – 3.57 (m, 3H), 3.25 – 3.13 (m, 2H), 2.89 (s, 3H), 2.49 (d,  $J = 14.2$  Hz, 2H), 2.21 (s, 3H), 2.20 – 2.06 (m, 2H), 1.56 (d,  $J = 7.1$  Hz, 3H);  $^{13}\text{C}$  NMR (100 MHz, Methanol- $d_4$ )  $\delta$  172.52, 148.59, 146.64, 145.18, 138.77, 135.12, 133.42, 132.69, 132.18, 130.47, 127.10, 126.05, 125.58, 124.80, 124.78, 115.75, 113.11, 54.94, 53.48, 52.86, 50.58, 46.94, 44.07, 43.70, 27.36, 22.42, 18.66; HRMS (ESI) calcd for  $\text{C}_{30}\text{H}_{40}\text{N}_5\text{O}_5$   $[\text{M}+\text{H}]^+$  518.2948, found 518.2952.

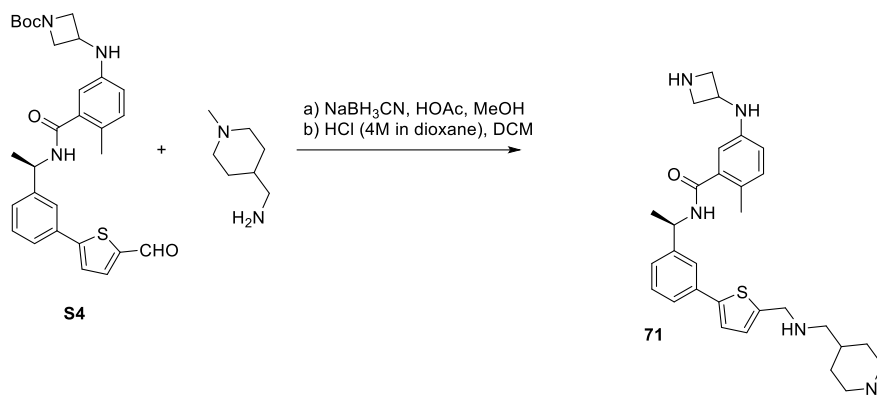

**(R)-5-(azetidin-3-ylamino)-2-methyl-N-(1-(3-(5-(((1-methylpiperidin-4-yl)methyl)amino)methyl)thiophen-2-yl)phenyl)ethyl)benzamide (71).** Tert-butyl (R)-3-((1-(3-(5-formylthiophen-2-yl)phenyl)ethyl)carbamoyl)-4-methylphenylamino)azetidine-1-carboxylate (**S4**) (31 mg, 0.06 mmol) and (1-methylpiperidin-4-yl)methanamine (12 mg, 0.09 mmol) was subjected to general reductive amination procedure with MeOH (2 mL), HOAc (500  $\mu$ L) at 50  $^{\circ}$ C, and then NaBH<sub>3</sub>CN (12 mg, 0.18 mmol) was added. After purification by Prep-HPLC, the product was subjected to general N-Boc deprotection procedure with HCl (4M in dioxane, 100  $\mu$ L) and DCM (2 mL). The purification by Prep-HPLC afforded the **71** (24 mg, yield 76 % for 2 steps) as a white solid:  $[\alpha]_{25}^{25} = -11.0$  (c 0.6, MeOH); <sup>1</sup>H NMR (400 MHz, Methanol-*d*<sub>4</sub>)  $\delta$  8.16 (s, 1H), 7.72 – 7.67 (m, 1H), 7.55 (tt, *J* = 5.7, 2.1 Hz, 1H), 7.44 – 7.32 (m, 4H), 7.04 (d, *J* = 9.0 Hz, 1H), 6.61 – 6.56 (m, 2H), 5.24 – 5.16 (m, 1H), 4.55 – 4.47 (m, 3H), 4.40 – 4.34 (m, 2H), 4.00 – 3.93 (m, 2H), 3.47 – 3.37 (m, 2H), 3.09 – 2.98 (m, 4H), 2.21 (s, 3H), 2.18 – 2.02 (m, 3H), 1.56 (d, *J* = 7.1 Hz, 5H); <sup>13</sup>C NMR (100 MHz, Methanol-*d*<sub>4</sub>)  $\delta$  172.60, 148.54, 146.64, 145.47, 138.83, 135.15, 133.43, 132.66, 132.50, 130.47, 127.02, 125.76, 125.60, 124.90, 124.73, 115.55, 112.84, 55.06, 52.47, 50.56, 47.01, 46.85, 44.47, 32.54, 27.57, 22.37, 18.63; HRMS (ESI) calcd for C<sub>31</sub>H<sub>42</sub>N<sub>5</sub>OS [M+H]<sup>+</sup> 532.3105, found 518.2952.

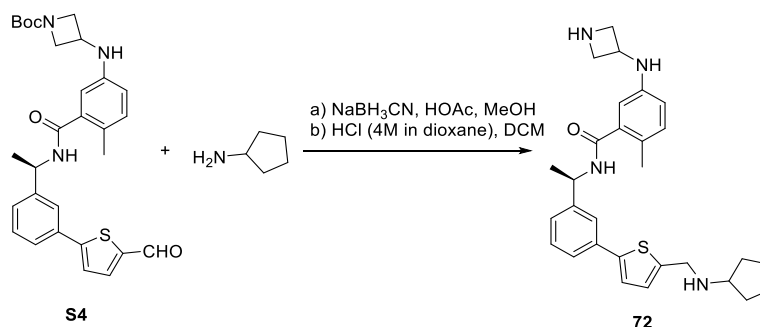

**(R)-5-(azetidin-3-ylamino)-N-(1-(3-(5-((cyclopentylamino)methyl)thiophen-2-yl)phenyl)ethyl)-2-methylbenzamide (72).** Tert-butyl (R)-3-((1-(3-(5-formylthiophen-2-yl)phenyl)ethyl)carbamoyl)-4-methylphenylamino)azetidine-1-carboxylate (**S4**) (31 mg, 0.06 mmol) and cyclopentanamine (8 mg, 0.09 mmol) was subjected to general reductive amination procedure with MeOH (2 mL), HOAc (500  $\mu$ L) at 50  $^{\circ}$ C, and then NaBH<sub>3</sub>CN (12 mg, 0.18 mmol) was added. After purification by Prep-HPLC, the product was subjected to general N-Boc deprotection procedure with HCl (4M in dioxane, 100  $\mu$ L) and DCM (2 mL). The purification by Prep-HPLC afforded the product **72** (21 mg, yield 71 % for 2 steps) as a white solid:  $[\alpha]_{25}^{25} = -3.1$  (c 0.2, MeOH); <sup>1</sup>H NMR (400 MHz, Methanol-*d*<sub>4</sub>)  $\delta$  8.45 (s, 1H), 7.72 – 7.67 (m, 1H), 7.57 – 7.52 (m, 1H), 7.43 – 7.37 (m, 3H), 7.28 (d, *J* = 3.8 Hz, 1H), 7.03 (d, *J* = 8.1 Hz, 1H), 6.60 – 6.54 (m, 2H), 5.21 (q, *J* = 7.1 Hz, 1H), 4.54 – 4.46 (m, 1H), 4.44 (s, 2H), 4.39 – 4.32 (m, 2H), 3.98 – 3.89 (m, 2H), 3.67 – 3.57 (m, 1H), 2.23 – 2.12 (m, 5H), 1.89 – 1.78 (m, 2H), 1.75 – 1.65 (m, 4H), 1.55 (d, *J* = 7.1 Hz, 3H); <sup>13</sup>C NMR (100 MHz, Methanol-*d*<sub>4</sub>)  $\delta$  172.60, 148.25, 146.62, 145.50, 138.86, 135.16, 133.08, 132.80, 132.64, 130.46, 126.96, 125.71, 125.61, 124.94, 124.75, 115.56, 112.80, 59.87, 54.88, 50.55, 46.86, 45.41, 30.73, 25.04, 22.34, 18.62; HRMS (ESI) calcd for C<sub>29</sub>H<sub>37</sub>N<sub>4</sub>OS [M+H]<sup>+</sup> 489.2683, found 489.2663.

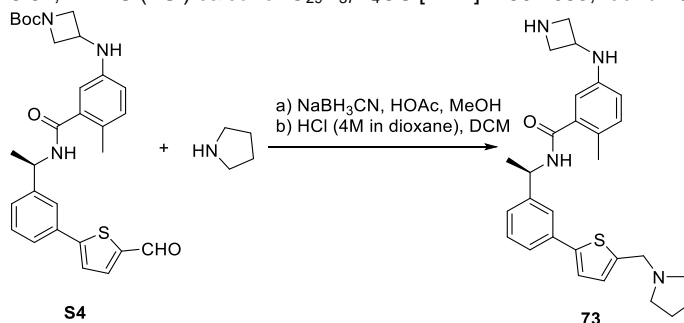

**(R)-5-(azetidin-3-ylamino)-2-methyl-N-(1-(3-(5-(pyrrolidin-1-ylmethyl)thiophen-2-yl)phenyl)ethyl)benzamide (73).** Tert-butyl (R)-3-((1-(3-(5-formylthiophen-2-yl)phenyl)ethyl)carbamoyl)-4-methylphenylamino)azetidine-1-carboxylate (**S4**) (31 mg, 0.06 mmol) and pyrrolidine (7 mg, 0.09 mmol) was subjected to general reductive amination procedure with MeOH (2 mL), HOAc (500  $\mu$ L) at 50  $^{\circ}$ C, and then NaBH<sub>3</sub>CN (12 mg, 0.18 mmol) was added. After purification by Prep-HPLC, the product was subjected to general N-Boc

deprotection procedure with HCl (4M in dioxane, 100  $\mu$ L) and DCM (2 mL). The purification by Prep-HPLC afforded the product **73** (15 mg, yield 54 % for 2 steps) as a white solid:  $^1\text{H}$  NMR (400 MHz, Methanol- $d_4$ )  $\delta$  8.44 (s, 1H), 7.72 – 7.67 (m, 1H), 7.58 – 7.53 (m, 1H), 7.44 – 7.37 (m, 3H), 7.31 – 7.27 (m, 1H), 7.03 (d,  $J$  = 7.9 Hz, 1H), 6.62 – 6.55 (m, 2H), 5.22 (q,  $J$  = 7.0 Hz, 1H), 4.57 (s, 2H), 4.53 – 4.46 (m, 1H), 4.39 – 4.32 (m, 2H), 3.94 (dd,  $J$  = 11.2, 6.5 Hz, 2H), 3.40 – 3.34 (m, 4H), 2.21 (s, 3H), 2.12 – 2.05 (m, 4H), 1.55 (d,  $J$  = 7.1 Hz, 3H);  $^{13}\text{C}$  NMR (100 MHz, Methanol- $d_4$ )  $\delta$  172.59, 148.64, 146.63, 145.49, 138.86, 135.11, 133.50, 132.72, 132.65, 130.47, 127.09, 125.73, 125.63, 124.91, 124.76, 115.56, 112.83, 54.90, 54.47, 53.16, 50.53, 46.86, 23.99, 22.36, 18.62; HRMS (ESI) calcd for  $\text{C}_{28}\text{H}_{35}\text{N}_4\text{OS}$   $[\text{M}+\text{H}]^+$  475.2526, found 475.2524.

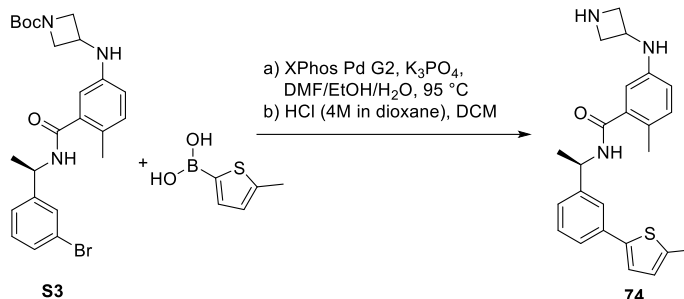

**(R)-5-(azetidin-3-ylamino)-2-methyl-N-(1-(3-(5-methylthiophen-2-yl)phenyl)ethyl)benzamide (74)**. A flask fitted with a rubber septum was charged with tert-butyl (R)-3-((3-((1-(3-bromophenyl)ethyl)carbamoyl)-4-methylphenyl)amino)azetidine-1-carboxylate (**S3**) (49 mg, 0.10 mmol), (5-methylthiophen-2-yl)boronic acid (21 mg, 0.15 mmol), XPhos Pd G2 (8 mg, 0.01 mmol),  $\text{K}_3\text{PO}_4$  (64 mg, 0.3 mmol), DMF/EtOH/ $\text{H}_2\text{O}$  (1 mL/ 1 mL/ 0.5 mL) and then purged with argon. The mixture was stirred at 95  $^\circ\text{C}$  overnight. The reaction mixture was then cooled to room temperature, diluted with ethyl acetate (20 mL), filtered through celite and concentrated in vacuo. After purification by Prep-HPLC, the product was subjected to general N-Boc deprotection procedure with HCl (4M in dioxane, 100  $\mu$ L) and DCM (2 mL). The purification by Prep-HPLC afforded the **74** (19 mg, yield 47% for 2 steps) as a white solid:  $[\alpha]_{\text{D}}^{25} = +14.7$  (c 1.5, MeOH);  $^1\text{H}$  NMR (400 MHz, Methanol- $d_4$ )  $\delta$  8.49 (s, 1H), 7.64 – 7.59 (m, 1H), 7.48 – 7.43 (m, 1H), 7.36 – 7.26 (m, 2H), 7.17 (d,  $J$  = 3.7 Hz, 1H), 7.03 (d,  $J$  = 8.2 Hz, 1H), 6.75 (dd,  $J$  = 3.5, 1.2 Hz, 1H), 6.59 – 6.52 (m, 2H), 5.20 (q,  $J$  = 7.0 Hz, 1H), 4.52 – 4.42 (m, 1H), 4.36 – 4.29 (m, 2H), 3.95 – 3.88 (m, 2H), 2.48 (d,  $J$  = 1.0 Hz, 3H), 2.22 (s, 3H), 1.54 (d,  $J$  = 7.1 Hz, 3H);  $^{13}\text{C}$  NMR (100 MHz, Methanol- $d_4$ )  $\delta$  172.56, 146.15, 145.45, 143.05, 140.67, 138.93, 136.30, 132.63, 130.14, 127.43, 125.92, 125.71, 125.06, 124.17, 124.14, 115.62, 112.71, 54.84, 50.52, 46.84, 22.39, 18.63, 15.29; HRMS (ESI) calcd for  $\text{C}_{24}\text{H}_{28}\text{N}_3\text{OS}$   $[\text{M}+\text{H}]^+$  406.1948, found 406.1958.

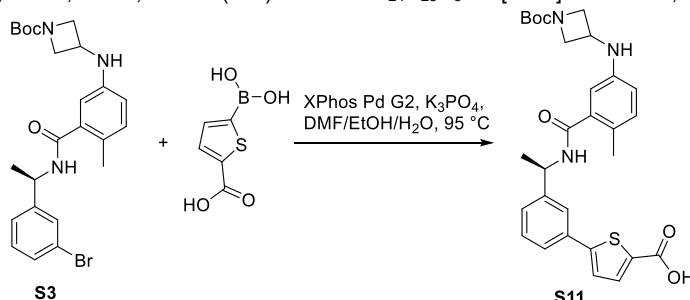

**(R)-5-(3-(1-(5-((1-(tert-butoxycarbonyl)azetidin-3-yl)amino)-2-methylbenzamido)ethyl)phenyl)thiophene-2-carboxylic acid (S11)**. A flask fitted with a rubber septum was charged with tert-butyl (R)-3-((3-((1-(3-bromophenyl)ethyl)carbamoyl)-4-methylphenyl)amino)azetidine-1-carboxylate (490 mg, 1.00 mmol), 5-boronothiophene-2-carboxylic acid (258 mg, 1.50 mmol), XPhos Pd G2 (40 mg, 0.05 mmol),  $\text{K}_3\text{PO}_4$  (531 mg, 2.5 mmol), DMF/EtOH/ $\text{H}_2\text{O}$  (5 mL/ 5 mL/ 2.5 mL) and then purged with argon. The mixture was stirred at 95  $^\circ\text{C}$  overnight. The reaction mixture was then cooled to room temperature, diluted with ethyl acetate (50 mL), filtered through celite and concentrated in vacuo. The purification by Prep-HPLC afforded the product **S11** (150 mg, yield 28%) as a white solid:  $^1\text{H}$  NMR (400 MHz, Methanol- $d_4$ )  $\delta$  7.77 – 7.71 (m, 2H), 7.63 – 7.58 (m, 1H), 7.44 – 7.39 (m, 3H), 7.00 (d,  $J$  = 8.0 Hz, 1H), 6.58 – 6.51 (m, 2H), 5.22 (q,  $J$  = 7.0 Hz, 1H), 4.28 – 4.16 (m, 3H), 3.73 – 3.65 (m, 2H), 2.21 (s, 3H), 1.55 (d,  $J$  = 7.1 Hz, 3H), 1.43 (s, 9H);  $^{13}\text{C}$  NMR (100 MHz, Methanol- $d_4$ )  $\delta$  172.83, 158.16, 146.73, 146.29, 138.69, 135.32, 135.12, 132.48, 130.44, 127.77, 125.78, 125.06, 124.79, 115.71, 112.60, 81.05, 50.37, 44.18, 28.64, 22.42, 18.58; LRMS (ESI) calcd 536.2, found 536.3.

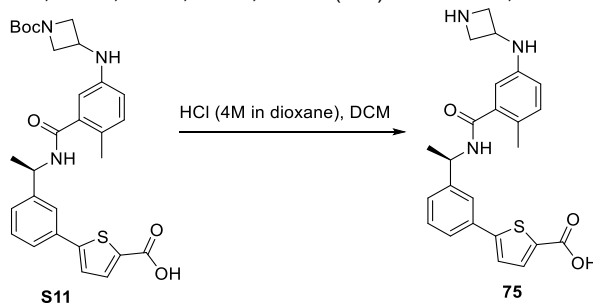

**(R)-5-(3-(1-(5-(azetidin-3-ylamino)-2-methylbenzamido)ethyl)phenyl)thiophene-2-carboxylic acid (75)**. (R)-5-(3-(1-(5-((1-(tert-butoxycarbonyl)azetidin-3-yl)amino)-2-methylbenzamido)ethyl)phenyl)thiophene-2-carboxylic acid (**S11**) (20 mg, 0.04 mmol) was subjected to general N-Boc deprotection procedure with HCl (4M in dioxane, 100  $\mu$ L) and DCM (2 mL). The purification by Prep-HPLC



afforded the **75** (14 mg, yield 86%) as a white solid:  $[\alpha]_{546}^{25} = +61.7$  (c 0.3, MeOH);  $^1\text{H NMR}$  (400 MHz, Methanol- $d_4$ )  $\delta$  7.75 – 7.72 (m, 1H), 7.65 – 7.62 (m, 1H), 7.58 (d,  $J = 3.8$  Hz, 1H), 7.44 – 7.32 (m, 3H), 7.05 (d,  $J = 8.3$  Hz, 1H), 6.68 – 6.61 (m, 2H), 5.21 (q,  $J = 7.0$  Hz, 1H), 4.67 (p,  $J = 7.3$  Hz, 1H), 4.50 – 4.37 (m, 2H), 4.05 – 3.93 (m, 2H), 2.27 (s, 3H), 1.54 (d,  $J = 7.1$  Hz, 3H);  $^{13}\text{C NMR}$  (100 MHz, Methanol- $d_4$ )  $\delta$  172.77, 149.48, 146.65, 145.45, 138.95, 135.71, 132.75, 132.68, 130.30, 127.54, 125.77, 124.96, 124.73, 123.55, 116.74, 111.35, 55.54, 55.33, 50.12, 46.78, 22.65, 18.47; HRMS (ESI) calcd for  $\text{C}_{24}\text{H}_{26}\text{N}_3\text{O}_3\text{S}$   $[\text{M}+\text{H}]^+$  436.1689, found 436.1697.

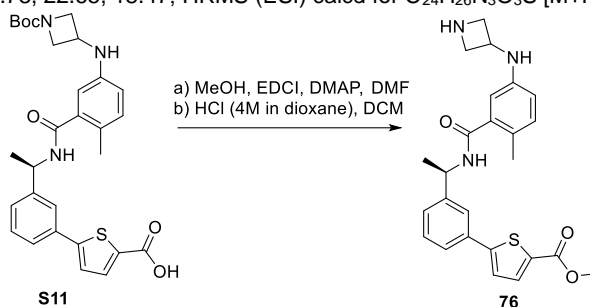

**Methyl (R)-5-(3-(1-(5-(azetidin-3-ylamino)-2-methylbenzamido)ethyl)phenyl)thiophene-2-carboxylate (76).** **S11** (16 mg, 0.03 mmol), MeOH (5 mg, 0.15 mmol), EDCI (10 mg, 0.05 mmol) and DMAP (11 mg, 0.09 mmol) was subjected to general amine coupling procedure with DMF (1 mL). After purification by Prep-HPLC, the product was subjected to general N-Boc deprotection procedure with HCl (4M in dioxane, 100  $\mu\text{L}$ ) and DCM (2 mL). The purification by Prep-HPLC afforded the **76** (11 mg, yield 82% for 2 steps) as a white solid:  $[\alpha]_{546}^{25} = +14.5$  (c 0.4, MeOH);  $^1\text{H NMR}$  (400 MHz, Acetone- $d_6$ )  $\delta$  8.21 (s, 1H), 7.89 – 7.86 (m, 1H), 7.79 (d,  $J = 3.9$  Hz, 1H), 7.67 – 7.61 (m, 1H), 7.56 – 7.42 (m, 3H), 6.95 (d,  $J = 8.4$  Hz, 1H), 6.62 (d,  $J = 2.6$  Hz, 1H), 6.55 (dd,  $J = 8.2, 2.6$  Hz, 1H), 5.38 – 5.24 (m, 1H), 4.08 (p,  $J = 6.7$  Hz, 1H), 3.87 (s, 3H), 3.80 – 3.73 (m, 2H), 3.26 – 3.19 (m, 2H), 2.20 (s, 3H), 1.59 (d,  $J = 7.0$  Hz, 3H);  $^{13}\text{C NMR}$  (100 MHz, Acetone- $d_6$ )  $\delta$  169.76, 162.83, 151.97, 147.31, 146.22, 138.76, 135.33, 134.21, 132.90, 132.08, 130.22, 127.91, 125.32, 125.01, 124.76, 124.44, 114.67, 112.51, 54.53, 54.49, 52.46, 49.35, 43.41, 22.72, 18.81; HRMS (ESI) calcd for  $\text{C}_{25}\text{H}_{28}\text{N}_3\text{O}_3\text{S}$   $[\text{M}+\text{H}]^+$  450.1846, found 450.1842.

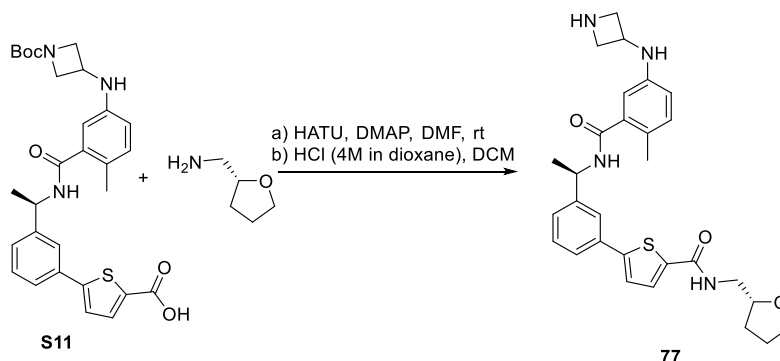

**5-(3-((R)-1-(5-(azetidin-3-ylamino)-2-methylbenzamido)ethyl)phenyl)-N-(((R)-tetrahydrofuran-2-yl)methyl)thiophene-2-carboxamide (77).** **S11** (16 mg, 0.03 mmol), (S)-tetrahydrofuran-2-ylmethanamine (6 mg, 0.06 mmol), HATU (15 mg, 0.04 mmol) and DMAP (11 mg, 0.09 mmol) was subjected to general amine coupling procedure with DMF (1 mL). After purification by Prep-HPLC, the product was subjected to general N-Boc deprotection procedure with HCl (4M in dioxane, 100  $\mu\text{L}$ ) and DCM (2 mL). The purification by Prep-HPLC afforded the product **77** (12 mg, yield 77% for 2 steps) as a white solid:  $[\alpha]_{546}^{25} = +2.1$  (c 0.7, MeOH);  $^1\text{H NMR}$  (400 MHz, Methanol- $d_4$ )  $\delta$  8.51 (s, 1H), 7.77 – 7.59 (m, 3H), 7.47 – 7.36 (m, 3H), 7.05 (d,  $J = 8.2$  Hz, 1H), 6.68 – 6.53 (m, 2H), 5.23 (q,  $J = 7.0$  Hz, 1H), 4.64 – 4.54 (m, 1H), 4.49 – 4.36 (m, 2H), 4.10 (dd,  $J = 6.9, 4.9$  Hz, 1H), 4.03 – 3.85 (m, 3H), 3.77 (q,  $J = 7.2$  Hz, 1H), 3.56 – 3.38 (m, 2H), 2.24 (s, 3H), 2.09 – 1.86 (m, 3H), 1.73 – 1.63 (m, 1H), 1.55 (d,  $J = 7.1$  Hz, 3H);  $^{13}\text{C NMR}$  (100 MHz, Methanol- $d_4$ )  $\delta$  171.29, 163.12, 149.06, 145.29, 144.06, 137.70, 137.54, 133.66, 131.28, 129.17, 129.04, 126.36, 124.33, 124.01, 123.63, 122.90, 114.83, 110.50, 77.77, 67.72, 53.87, 53.80, 48.90, 45.45, 43.40, 28.50, 25.19, 21.06, 17.15; HRMS (ESI) calcd for  $\text{C}_{29}\text{H}_{35}\text{N}_4\text{O}_3\text{S}$   $[\text{M}+\text{H}]^+$  519.2424, found 519.2424.

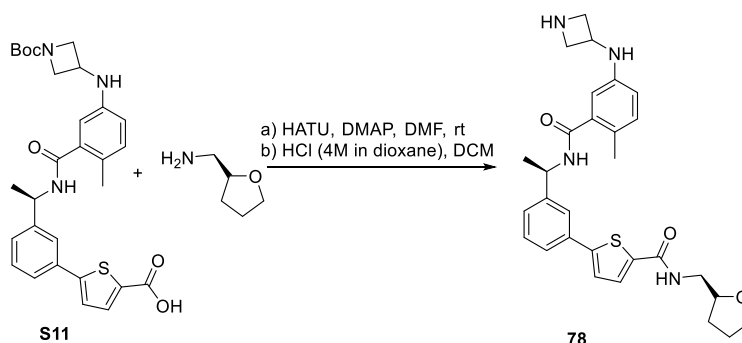

**5-(3-((R)-1-(5-(azetidin-3-ylamino)-2-methylbenzamido)ethyl)phenyl)-N-(((R)-tetrahydrofuran-2-yl)methyl)thiophene-2-carboxamide (78).** **S11** (16 mg, 0.03 mmol), (R)-tetrahydrofuran-2-ylmethanamine (6 mg, 0.06 mmol), HATU (15 mg, 0.04 mmol)

and DMAP (11 mg, 0.09 mmol) was subjected to general amine coupling procedure with DMF (1 mL). After purification by Prep-HPLC, the product was subjected to general N-Boc deprotection procedure with HCl (4M in dioxane, 100  $\mu$ L) and DCM (2 mL). The purification by Prep-HPLC afforded the product **78** (13 mg, yield 84% for 2 steps) as a white solid:  $[\alpha]_{546}^{25} = +56.7$  (c 1.2, MeOH);  $^1\text{H NMR}$  (400 MHz, Methanol- $d_4$ )  $\delta$  8.41 (s, 1H), 7.74 – 7.72 (m, 1H), 7.69 (d,  $J = 3.9$  Hz, 1H), 7.63 – 7.59 (m, 1H), 7.45 – 7.37 (m, 3H), 7.04 (d,  $J = 8.2$  Hz, 1H), 6.64 – 6.56 (m, 2H), 5.22 (q,  $J = 7.1$  Hz, 1H), 4.61 – 4.52 (m, 1H), 4.46 – 4.36 (m, 2H), 4.09 (qd,  $J = 6.9, 4.6$  Hz, 1H), 4.01 – 3.93 (m, 2H), 3.92 – 3.84 (m, 1H), 3.80 – 3.72 (m, 1H), 3.52 – 3.38 (m, 2H), 2.24 (s, 3H), 2.09 – 1.86 (m, 3H), 1.72 – 1.61 (m, 1H), 1.55 (d,  $J = 7.1$  Hz, 3H);  $^{13}\text{C NMR}$  (100 MHz, Methanol- $d_4$ )  $\delta$  172.68, 164.48, 150.42, 146.71, 145.47, 139.09, 138.89, 135.06, 132.68, 130.59, 130.45, 127.72, 125.72, 125.44, 125.04, 124.34, 116.18, 112.02, 79.18, 69.09, 55.11, 50.32, 46.81, 44.85, 29.93, 26.57, 22.49, 18.57; HRMS (ESI) calcd for  $\text{C}_{29}\text{H}_{35}\text{N}_4\text{O}_3\text{S}$   $[\text{M}+\text{H}]^+$  519.2424, found 519.2424.

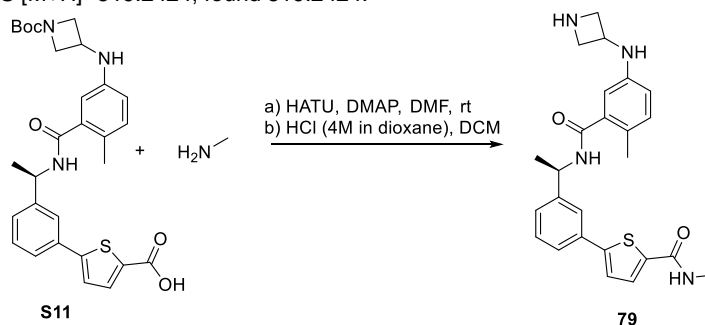

**(R)-5-(3-(1-(5-(azetidin-3-ylamino)-2-methylbenzamido)ethyl)phenyl)-N-methylthiophene-2-carboxamide (79).** **S11** (16 mg, 0.03 mmol), methylamine (2 M in THF, 75  $\mu$ L), HATU (15 mg, 0.04 mmol) and DMAP (11 mg, 0.09 mmol) was subjected to general amine coupling procedure with DMF (1 mL). After purification by Prep-HPLC, the product was subjected to general N-Boc deprotection procedure with HCl (4M in dioxane, 100  $\mu$ L) and DCM (2 mL). The purification by Prep-HPLC afforded the product **79** (12 mg, yield 89% for 2 steps) as a white solid:  $[\alpha]_{546}^{25} = +41.5$  (c 0.8, MeOH);  $^1\text{H NMR}$  (400 MHz, Methanol- $d_4$ )  $\delta$  8.45 (s, 1H), 7.75 – 7.71 (m, 1H), 7.63 – 7.59 (m, 2H), 7.45 – 7.37 (m, 3H), 7.04 (d,  $J = 8.2$  Hz, 1H), 6.65 – 6.55 (m, 2H), 5.22 (q,  $J = 7.0$  Hz, 1H), 4.60 – 4.52 (m, 1H), 4.46 – 4.36 (m, 2H), 4.01 – 3.92 (m, 2H), 2.92 (s, 3H), 2.23 (s, 3H), 1.55 (d,  $J = 7.1$  Hz, 3H);  $^{13}\text{C NMR}$  (100 MHz, Methanol- $d_4$ )  $\delta$  172.68, 164.91, 150.17, 146.69, 145.46, 139.09, 138.90, 135.10, 132.69, 130.44, 130.34, 127.68, 125.76, 125.48, 125.01, 124.40, 116.12, 112.10, 55.13, 50.35, 46.85, 26.77, 22.47, 18.56; HRMS (ESI) calcd for  $\text{C}_{25}\text{H}_{29}\text{N}_4\text{O}_2\text{S}$   $[\text{M}+\text{H}]^+$  449.2006, found 449.2015.

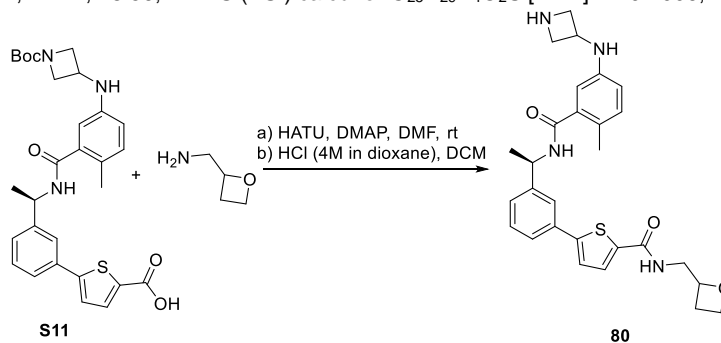

**5-(3-(R)-1-(5-(azetidin-3-ylamino)-2-methylbenzamido)ethyl)phenyl)-N-(oxetan-2-ylmethyl)thiophene-2-carboxamide (80).** **S11** (16 mg, 0.03 mmol), oxetan-2-ylmethanamine (5 mg, 0.06 mmol), HATU (15 mg, 0.04 mmol) and DMAP (11 mg, 0.09 mmol) was subjected to general amine coupling procedure with DMF (1 mL). After purification by Prep-HPLC, the product was subjected to general N-Boc deprotection procedure with HCl (4M in dioxane, 100  $\mu$ L) and DCM (2 mL). The purification by Prep-HPLC afforded the product **80** (13 mg, yield 86% for 2 steps) as a white solid:  $^1\text{H NMR}$  (400 MHz, Methanol- $d_4$ )  $\delta$  8.36 (s, 1H), 7.76 – 7.70 (m, 1H), 7.64 – 7.58 (m, 2H), 7.46 – 7.37 (m, 3H), 7.04 (d,  $J = 8.2$  Hz, 1H), 6.64 – 6.52 (m, 2H), 5.23 (q,  $J = 7.3$  Hz, 1H), 4.99 – 4.92 (m, 1H), 4.55 – 4.47 (m, 1H), 4.42 – 4.32 (m, 2H), 4.17 – 4.09 (m, 1H), 3.98 – 3.90 (m, 2H), 3.79 – 3.65 (m, 3H), 2.23 (s, 3H), 2.05 – 1.84 (m, 2H), 1.55 (d,  $J = 7.2$  Hz, 3H);  $^{13}\text{C NMR}$  (100 MHz, Methanol- $d_4$ )  $\delta$  172.60, 161.81, 150.50, 146.72, 145.44, 138.92, 134.94, 133.18, 132.68, 130.50, 129.71, 127.79, 125.78, 125.08, 124.73, 115.75, 112.52, 79.84, 60.38, 59.15, 55.04, 54.99, 50.47, 46.88, 39.16, 22.44, 18.60; HRMS (ESI) calcd for  $\text{C}_{28}\text{H}_{33}\text{N}_4\text{O}_3\text{S}$   $[\text{M}+\text{H}]^+$  505.2268, found 505.2260.

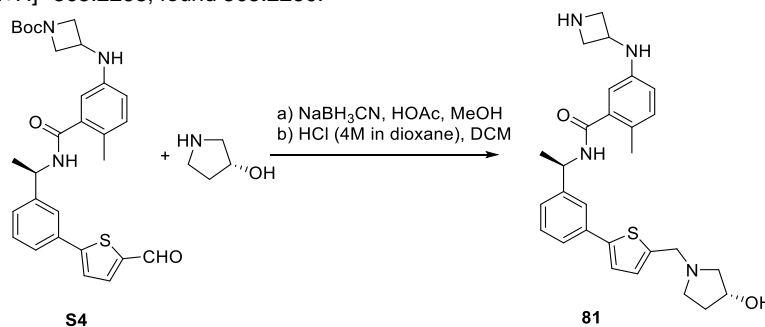

**5-(azetidin-3-ylamino)-N-((R)-1-(3-(5-(((R)-3-hydroxypyrrolidin-1-yl)methyl)thiophen-2-yl)phenyl)ethyl)-2-methylbenzamide (81).** Tert-butyl (R)-3-((3-((1-(3-(5-formylthiophen-2-yl)phenyl)ethyl)carbamoyl)-4-methylphenyl)amino)azetidine-1-carboxylate (**S4**) (31 mg, 0.06 mmol) and (R)-pyrrolidin-3-ol (8 mg, 0.09 mmol) was subjected to general reductive amination procedure with MeOH (2 mL), HOAc (500  $\mu$ L) at 50  $^{\circ}$ C, and then NaBH<sub>3</sub>CN (12 mg, 0.18 mmol) was added. After purification by Prep-HPLC, the product was subjected to general N-Boc deprotection procedure with HCl (4M in dioxane, 100  $\mu$ L) and DCM (2 mL). The purification by Prep-HPLC afforded the product **81** (19 mg, yield 63 % for 2 steps) as a white solid:  $[\alpha]_{546}^{25} = +10.0$  (c 0.3, MeOH); <sup>1</sup>H NMR (400 MHz, Methanol-*d*<sub>4</sub>)  $\delta$  8.49 (s, 1H), 7.70 – 7.65 (m, 1H), 7.56 – 7.51 (m, 1H), 7.43 – 7.31 (m, 3H), 7.15 (d, *J* = 3.7 Hz, 1H), 7.04 (d, *J* = 8.3 Hz, 1H), 6.58 (dd, *J* = 8.1, 2.6 Hz, 1H), 6.54 (d, *J* = 2.7 Hz, 1H), 5.22 (q, *J* = 7.2 Hz, 1H), 4.55 – 4.44 (m, 2H), 4.38 – 4.32 (m, 2H), 4.29 – 4.20 (m, 2H), 3.96 – 3.90 (m, 2H), 3.28 – 3.19 (m, 1H), 3.17 – 3.10 (m, 1H), 3.06 – 2.94 (m, 2H), 2.27 – 2.16 (m, 4H), 1.95 – 1.86 (m, 1H), 1.55 (d, *J* = 7.1 Hz, 3H); <sup>13</sup>C NMR (100 MHz, Methanol-*d*<sub>4</sub>)  $\delta$  172.59, 147.10, 146.50, 145.46, 138.93, 135.57, 132.66, 131.36, 130.36, 126.77, 125.76, 125.46, 124.67, 124.36, 115.66, 112.64, 70.90, 62.56, 55.00, 54.86, 53.38, 50.53, 46.90, 34.65, 22.37, 18.61; HRMS (ESI) calcd for C<sub>28</sub>H<sub>35</sub>N<sub>4</sub>O<sub>2</sub>S [M+H]<sup>+</sup> 491.2475, found 491.2483.

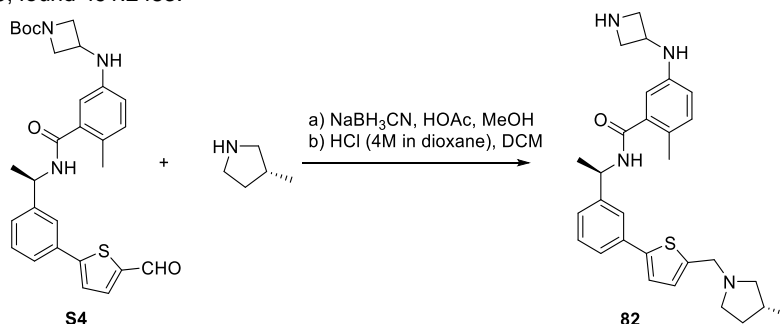

**5-(azetidin-3-ylamino)-2-methyl-N-((R)-1-(3-(5-(((R)-3-methylpyrrolidin-1-yl)methyl)thiophen-2-yl)phenyl)ethyl)benzamide (82).** Tert-butyl (R)-3-((3-((1-(3-(5-formylthiophen-2-yl)phenyl)ethyl)carbamoyl)-4-methylphenyl)amino)azetidine-1-carboxylate (**S4**) (31 mg, 0.06 mmol) and (R)-3-methylpyrrolidine (8 mg, 0.09 mmol) was subjected to general reductive amination procedure with MeOH (2 mL), HOAc (500  $\mu$ L) at 50  $^{\circ}$ C, and then NaBH<sub>3</sub>CN (12 mg, 0.18 mmol) was added. After purification by Prep-HPLC, the product was subjected to general N-Boc deprotection procedure with HCl (4M in dioxane, 100  $\mu$ L) and DCM (2 mL). The purification by Prep-HPLC afforded the product **82** (13 mg, yield 43 % for 2 steps) as a white solid: LRMS (ESI) calcd for C<sub>29</sub>H<sub>37</sub>N<sub>4</sub>O [M+H]<sup>+</sup> 489.3, found 489.3.

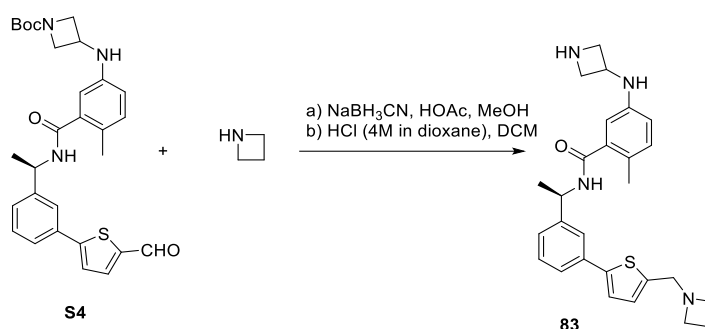

**(R)-N-1-(3-(5-(azetidin-1-ylmethyl)thiophen-2-yl)phenyl)ethyl)-5-(azetidin-3-ylamino)-2-methylbenzamide (83).** Tert-butyl (R)-3-((3-((1-(3-(5-formylthiophen-2-yl)phenyl)ethyl)carbamoyl)-4-methylphenyl)amino)azetidine-1-carboxylate (**S4**) (31 mg, 0.06 mmol) and azetidine hydrochloride salt (8 mg, 0.09 mmol) was subjected to general reductive amination procedure with MeOH (2 mL), HOAc (500  $\mu$ L) at 50  $^{\circ}$ C, and then NaBH<sub>3</sub>CN (12 mg, 0.18 mmol) was added. After purification by Prep-HPLC, the product was subjected to general N-Boc deprotection procedure with HCl (4M in dioxane, 100  $\mu$ L) and DCM (2 mL). The purification by Prep-HPLC afforded the product **83** (14 mg, yield 49 % for 2 steps) as a white solid: <sup>1</sup>H NMR (400 MHz, Methanol-*d*<sub>4</sub>)  $\delta$  8.51 (s, 1H), 7.69 – 7.65 (m, 1H), 7.55 – 7.51 (m, 1H), 7.43 – 7.33 (m, 3H), 7.17 (d, *J* = 3.8 Hz, 1H), 7.04 (d, *J* = 8.2 Hz, 1H), 6.60 – 6.53 (m, 2H), 5.21 (q, *J* = 7.0 Hz, 1H), 4.50 (p, *J* = 6.5 Hz, 1H), 4.39 – 4.29 (m, 4H), 3.97 – 3.87 (m, 6H), 2.39 (p, *J* = 7.8 Hz, 2H), 2.21 (s, 3H), 1.55 (d, *J* = 7.1 Hz, 3H); <sup>13</sup>C NMR (100 MHz, Methanol-*d*<sub>4</sub>)  $\delta$  172.60, 146.56, 145.47, 138.91, 135.34, 132.65, 131.71, 130.41, 126.87, 125.73, 125.53, 124.81, 124.61, 115.58, 112.73, 55.19, 55.03, 54.96, 50.55, 46.89, 22.37, 18.62, 17.39; HRMS (ESI) calcd for C<sub>27</sub>H<sub>33</sub>N<sub>4</sub>O [M+H]<sup>+</sup> 461.2370, found 461.2370.

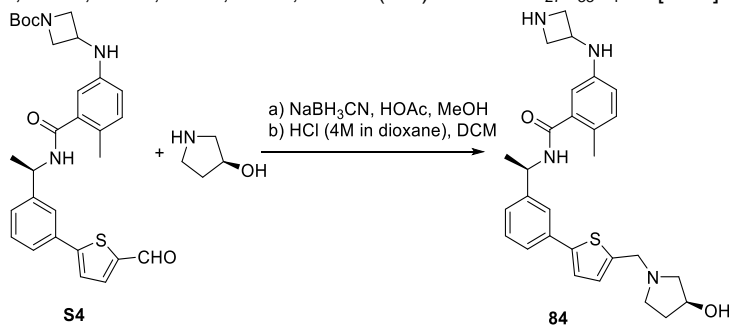

**5-(azetidin-3-ylamino)-N-((R)-1-(3-(5-(((S)-3-hydroxypyrrolidin-1-yl)methyl)thiophen-2-yl)phenyl)ethyl)-2-methylbenzamide (84)**

**(84)**. Tert-butyl (R)-3-((3-((1-(3-(5-formylthiophen-2-yl)phenyl)ethyl)carbamoyl)-4-methylphenyl)amino)azetidine-1-carboxylate (**S4**) (31 mg, 0.06 mmol) and (S)-pyrrolidin-3-ol (8 mg, 0.09 mmol) was subjected to general reductive amination procedure with MeOH (2 mL), HOAc (500  $\mu$ L) at 50  $^{\circ}$ C, and then NaBH<sub>3</sub>CN (12 mg, 0.18 mmol) was added. After purification by Prep-HPLC, the product was subjected to general N-Boc deprotection procedure with HCl (4M in dioxane, 100  $\mu$ L) and DCM (2 mL). The purification by Prep-HPLC afforded the product **84** (16 mg, yield 55 % for 2 steps) as a white solid: <sup>1</sup>H NMR (400 MHz, Methanol-*d*<sub>4</sub>)  $\delta$  8.37 (s, 1H), 7.72 – 7.66 (m, 1H), 7.58 – 7.53 (m, 1H), 7.44 – 7.37 (m, 3H), 7.28 (d, *J* = 3.7 Hz, 1H), 7.04 (d, *J* = 8.2 Hz, 1H), 6.61 – 6.54 (m, 2H), 5.22 (q, *J* = 7.0 Hz, 1H), 4.61 – 4.46 (m, 4H), 4.40 – 4.33 (m, 2H), 3.98 – 3.91 (m, 2H), 3.53 (dt, *J* = 11.4, 8.0 Hz, 1H), 3.41 – 3.31 (m, 2H), 3.28 – 3.22 (m, 1H), 2.34 – 2.22 (m, 1H), 2.21 (s, 3H), 2.09 – 1.99 (m, 1H), 1.55 (d, *J* = 7.1 Hz, 3H); <sup>13</sup>C NMR (100 MHz, Methanol-*d*<sub>4</sub>)  $\delta$  172.60, 148.48, 146.61, 145.47, 138.87, 135.16, 133.36, 133.28, 132.65, 130.46, 127.02, 125.74, 125.61, 124.92, 124.70, 115.57, 112.77, 70.41, 62.07, 54.99, 54.37, 53.34, 50.55, 46.86, 34.22, 22.36, 18.62; HRMS (ESI) calcd for C<sub>28</sub>H<sub>35</sub>N<sub>4</sub>O<sub>2</sub>S [M+H]<sup>+</sup> 491.2475, found 491.2483.

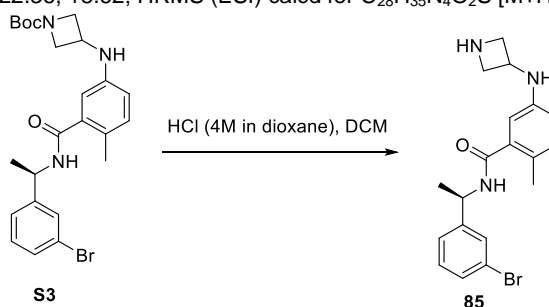

**(R)-5-(azetidin-3-ylamino)-N-(1-(3-bromophenyl)ethyl)-2-methylbenzamide (85)**. **S3** (20 mg, 0.04 mmol) was subjected to general N-Boc deprotection procedure with HCl (4M in dioxane, 100  $\mu$ L) and DCM (2 mL). The purification by Prep-HPLC afforded the product **85** (14 mg, yield 86%) as a white solid:  $[\alpha]_{546}^{25} = +16.4$  (c 0.9, MeOH); <sup>1</sup>H NMR (400 MHz, Methanol-*d*<sub>4</sub>)  $\delta$  7.62 – 7.54 (m, 1H), 7.43 – 7.35 (m, 2H), 7.30 – 7.23 (m, 1H), 7.03 (d, *J* = 8.2 Hz, 1H), 6.60 – 6.51 (m, 2H), 5.15 (q, *J* = 7.1 Hz, 1H), 4.50 (p, *J* = 6.8 Hz, 1H), 4.36 (t, *J* = 9.1 Hz, 2H), 3.97 – 3.88 (m, 2H), 2.20 (s, 3H), 1.50 (d, *J* = 7.1 Hz, 3H); <sup>13</sup>C NMR (100 MHz, Methanol-*d*<sub>4</sub>)  $\delta$  172.58, 148.13, 145.47, 138.75, 132.66, 131.41, 131.16, 130.33, 126.19, 125.71, 123.47, 115.63, 112.68, 54.89, 50.15, 46.84, 22.21, 18.53. HRMS (ESI) calcd for C<sub>19</sub>H<sub>23</sub>BrN<sub>3</sub>O [M+H]<sup>+</sup> 388.1019, found 388.1022.

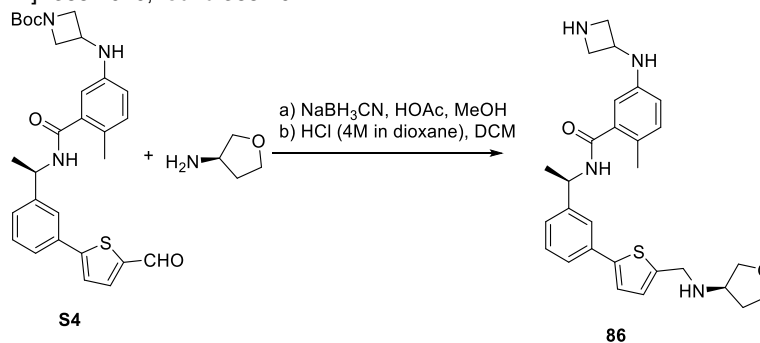

**5-(azetidin-3-ylamino)-2-methyl-N-((R)-1-(3-(5-(((R)-tetrahydrofuran-3-yl)amino)methyl)thiophen-2-yl)phenyl)ethyl)benzamide (86)**

**(86)**. **S4** (31 mg, 0.06 mmol) and (R)-tetrahydrofuran-3-amine (8 mg, 0.09 mmol) was subjected to general reductive amination procedure with MeOH (2 mL), HOAc (500  $\mu$ L) at 50  $^{\circ}$ C, and then NaBH<sub>3</sub>CN (12 mg, 0.18 mmol) was added. After purification by Prep-HPLC, the product was subjected to general N-Boc deprotection procedure with HCl (4M in dioxane, 100  $\mu$ L) and DCM (2 mL). The purification by Prep-HPLC afforded the product **86** (21 mg, yield 71 % for 2 steps) as a white solid:  $[\alpha]_{546}^{25} = +1.5$  (c 0.4, MeOH); <sup>1</sup>H NMR (400 MHz, Methanol-*d*<sub>4</sub>)  $\delta$  8.36 (s, 1H), 7.71 – 7.66 (m, 1H), 7.57 – 7.52 (m, 1H), 7.44 – 7.34 (m, 3H), 7.22 (d, *J* = 3.7 Hz, 1H), 7.03 (d, *J* = 8.2 Hz, 1H), 6.61 – 6.52 (m, 2H), 5.21 (q, *J* = 7.0 Hz, 1H), 4.50 (p, *J* = 6.9 Hz, 1H), 4.40 – 4.30 (m, 4H), 4.03 (td, *J* = 8.4, 5.4 Hz, 1H), 3.97 – 3.81 (m, 5H), 3.75 (td, *J* = 8.4, 6.8 Hz, 1H), 2.41 – 2.28 (m, 1H), 2.20 (s, 3H), 2.08 – 1.97 (m, 1H), 1.55 (d, *J* = 7.1 Hz, 3H); <sup>13</sup>C NMR (100 MHz, Methanol-*d*<sub>4</sub>)  $\delta$  172.59, 147.63, 146.56, 145.47, 138.89, 135.36, 135.25, 132.65, 131.92, 130.41, 126.84, 125.74, 125.54, 124.83, 124.62, 115.59, 112.76, 71.32, 68.06, 59.04, 54.94, 50.55, 46.88, 45.74, 31.17, 22.34, 18.61; HRMS (ESI) calcd for C<sub>28</sub>H<sub>35</sub>N<sub>4</sub>O<sub>2</sub>S [M+H]<sup>+</sup> 491.2475, found 491.2483.

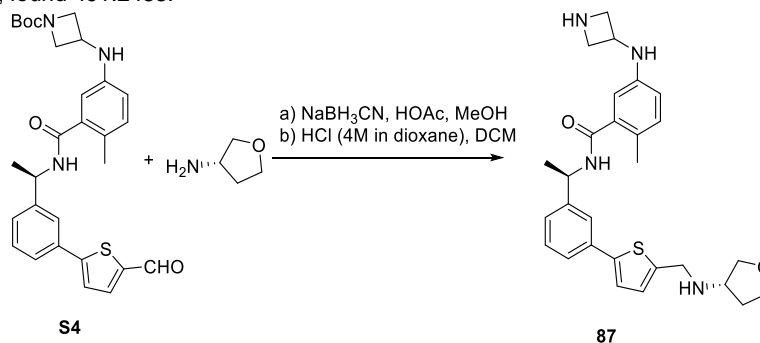

**5-(azetidin-3-ylamino)-2-methyl-N-((R)-1-(3-(5-(((S)-tetrahydrofuran-3-yl)amino)methyl)thiophen-2-yl)phenyl)ethyl)benzamide (87).** **S4** (31 mg, 0.06 mmol) and (S)-tetrahydrofuran-3-amine (8 mg, 0.09 mmol) was subjected to general reductive amination procedure with MeOH (2 mL), HOAc (500  $\mu$ L) at 50  $^{\circ}$ C, and then NaBH<sub>3</sub>CN (12 mg, 0.18 mmol) was added. After purification by Prep-HPLC, the product was subjected to general N-Boc deprotection procedure with HCl (4M in dioxane, 100  $\mu$ L) and DCM (2 mL). The purification by Prep-HPLC afforded the **87** (19 mg, yield 65 % for 2 steps) as a white solid:  $[\alpha]_{D}^{25} = +6.7$  (c 0.9, MeOH); <sup>1</sup>H NMR (400 MHz, Methanol-*d*<sub>4</sub>)  $\delta$  8.43 (s, 1H), 7.67 (t, *J* = 1.8 Hz, 1H), 7.56 – 7.50 (m, 1H), 7.42 – 7.30 (m, 3H), 7.12 (d, *J* = 3.7 Hz, 1H), 7.04 (d, *J* = 8.3 Hz, 1H), 6.58 (dd, *J* = 8.2, 2.6 Hz, 1H), 6.53 (d, *J* = 2.6 Hz, 1H), 5.21 (q, *J* = 7.1 Hz, 1H), 4.54 – 4.45 (m, 1H), 4.39 – 4.31 (m, 2H), 4.22 – 4.12 (m, 2H), 4.03 – 3.89 (m, 3H), 3.86 – 3.64 (m, 4H), 2.30 – 2.23 (m, 1H), 2.21 (s, 3H), 1.98 – 1.87 (m, 1H), 1.55 (d, *J* = 7.1 Hz, 3H); <sup>13</sup>C NMR (100 MHz, Methanol-*d*<sub>4</sub>)  $\delta$  171.18, 145.03, 144.04, 137.56, 134.30, 131.25, 128.92, 128.75, 125.20, 124.34, 124.02, 123.24, 122.95, 114.23, 111.24, 71.04, 66.72, 57.49, 53.59, 49.13, 45.50, 45.19, 30.79, 20.95, 17.20; HRMS (ESI) calcd for C<sub>28</sub>H<sub>35</sub>N<sub>4</sub>O<sub>2</sub>S [M+H]<sup>+</sup> 491.2475, found 491.2479.

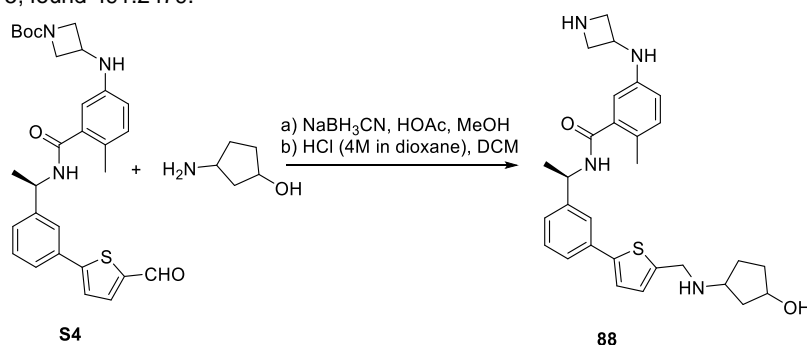

**5-(azetidin-3-ylamino)-N-((1R)-1-(3-(5-(((3-hydroxycyclopentyl)amino)methyl)thiophen-2-yl)phenyl)ethyl)-2-methylbenzamide (88).** **S4** (31 mg, 0.06 mmol) and 3-aminocyclopentan-1-ol (9 mg, 0.09 mmol) was subjected to general reductive amination procedure with MeOH (2 mL), HOAc (500  $\mu$ L) at 50  $^{\circ}$ C, and then NaBH<sub>3</sub>CN (12 mg, 0.18 mmol) was added. After purification by Prep-HPLC, the product was subjected to general N-Boc deprotection procedure with HCl (4M in dioxane, 100  $\mu$ L) and DCM (2 mL). The purification by Prep-HPLC afforded the product **88** (22 mg, yield 73 % for 2 steps) as a white solid: <sup>1</sup>H NMR (400 MHz, Methanol-*d*<sub>4</sub>)  $\delta$  8.44 (s, 1H), 7.69 (s, 1H), 7.55 (d, *J* = 6.6 Hz, 1H), 7.44 – 7.37 (m, 3H), 7.27 (d, *J* = 3.7 Hz, 1H), 7.03 (d, *J* = 8.0 Hz, 1H), 6.62 – 6.54 (m, 2H), 5.26 – 5.15 (m, 1H), 4.54 – 4.26 (m, 6H), 3.98 – 3.90 (m, 2H), 3.73 – 3.63 (m, 1H), 2.30 – 2.12 (m, 5H), 2.04 – 1.92 (m, 1H), 1.88 – 1.79 (m, 3H), 1.55 (d, *J* = 7.0 Hz, 3H); <sup>13</sup>C NMR (100 MHz, Methanol-*d*<sub>4</sub>)  $\delta$  172.60, 148.28, 146.62, 145.49, 138.86, 135.16, 133.09, 132.84, 132.64, 130.46, 126.94, 125.71, 125.60, 124.95, 124.76, 115.56, 112.79, 72.55, 58.48, 54.92, 50.55, 46.87, 45.19, 39.33, 34.42, 28.38, 22.34, 18.61; HRMS (ESI) calcd for C<sub>29</sub>H<sub>37</sub>N<sub>4</sub>O<sub>2</sub>S [M+H]<sup>+</sup> 505.2632, found 505.2637.

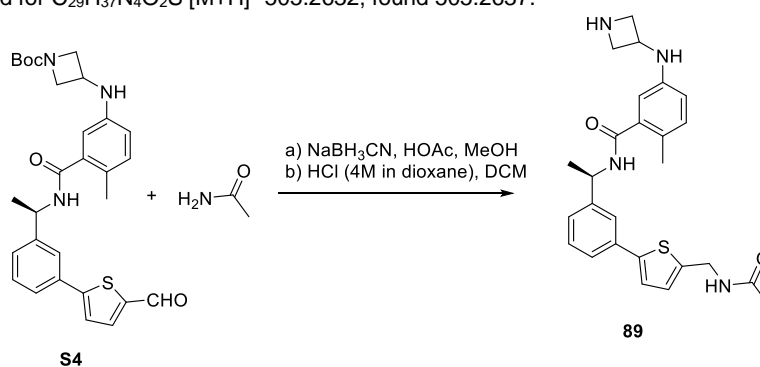

**(R)-N-1-(3-(5-(acetamidomethyl)thiophen-2-yl)phenyl)ethyl)-5-(azetidin-3-ylamino)-2-methylbenzamide (89).** **S4** (31 mg, 0.06 mmol) and acetamide (6 mg, 0.09 mmol) was subjected to general reductive amination procedure with MeOH (2 mL), HOAc (500  $\mu$ L) at 50  $^{\circ}$ C, and then NaBH<sub>3</sub>CN (12 mg, 0.18 mmol) was added. After purification by Prep-HPLC, the product was subjected to general N-Boc deprotection procedure with HCl (4M in dioxane, 100  $\mu$ L) and DCM (2 mL). The purification by Prep-HPLC afforded the product **89** (20 mg, yield 73 % for 2 steps) as a white solid: <sup>1</sup>H NMR (400 MHz, Methanol-*d*<sub>4</sub>)  $\delta$  8.55 (s, 2H), 7.65 – 7.61 (m, 1H), 7.52 – 7.48 (m, 1H), 7.39 – 7.29 (m, 2H), 7.23 (d, *J* = 3.6 Hz, 1H), 7.03 (d, *J* = 8.2 Hz, 1H), 6.96 (d, *J* = 3.7 Hz, 1H), 6.58 (dd, *J* = 8.2, 2.6 Hz, 1H), 6.53 (d, *J* = 2.6 Hz, 1H), 5.23 – 5.17 (m, 1H), 4.52 (s, 2H), 4.49 – 4.42 (m, 1H), 4.31 – 4.23 (m, 2H), 3.91 – 3.84 (m, 2H), 2.22 (s, 3H), 1.98 (s, 3H), 1.54 (d, *J* = 7.1 Hz, 3H); <sup>13</sup>C NMR (100 MHz, Methanol-*d*<sub>4</sub>)  $\delta$  172.63, 146.32, 145.58, 144.99, 142.64, 138.93, 136.03, 132.62, 130.21, 127.84, 126.46, 125.63, 125.20, 124.25, 123.87, 122.97, 115.72, 112.54, 55.04, 50.47, 47.24, 39.15, 22.51, 22.39, 18.60; HRMS (ESI) calcd for C<sub>26</sub>H<sub>31</sub>N<sub>4</sub>O<sub>2</sub>S [M+H]<sup>+</sup> 463.2162, found 463.2164.

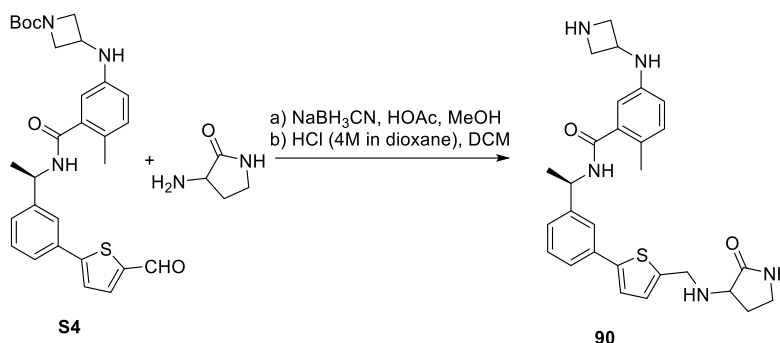

**5-(azetidin-3-ylamino)-2-methyl-N-((1R)-1-(3-(5-(((2-oxopyrrolidin-3-yl)amino)methyl)thiophen-2-yl)phenyl)ethyl)benzamide (90).** **S4** (31 mg, 0.06 mmol) and 3-aminopyrrolidin-2-one (9 mg, 0.09 mmol) was subjected to general reductive amination procedure with MeOH (2 mL), HOAc (500  $\mu\text{L}$ ) at 50  $^\circ\text{C}$ , and then  $\text{NaBH}_3\text{CN}$  (12 mg, 0.18 mmol) was added. After purification by Prep-HPLC, the product was subjected to general N-Boc deprotection procedure with HCl (4M in dioxane, 100  $\mu\text{L}$ ) and DCM (2 mL). The purification by Prep-HPLC afforded the product **90** (19 mg, yield 63 % for 2 steps) as a white solid:  $^1\text{H}$  NMR (400 MHz, Methanol- $d_4$ )  $\delta$  8.28 (s, 2H), 7.71 – 7.65 (m, 1H), 7.56 – 7.51 (m, 1H), 7.42 – 7.30 (m, 3H), 7.14 (d,  $J$  = 3.7 Hz, 1H), 7.03 (d,  $J$  = 8.3 Hz, 1H), 6.59 (dd,  $J$  = 8.2, 2.6 Hz, 1H), 6.55 – 6.51 (m, 1H), 5.21 (q,  $J$  = 7.0 Hz, 1H), 4.49 (p,  $J$  = 7.0 Hz, 1H), 4.39 – 4.27 (m, 4H), 3.98 – 3.90 (m, 2H), 3.79 – 3.72 (m, 1H), 3.44 – 3.33 (m, 2H), 2.55 – 2.46 (m, 1H), 2.22 (s, 3H), 2.11 – 1.99 (m, 1H), 1.55 (d,  $J$  = 7.0 Hz, 3H);  $^{13}\text{C}$  NMR (100 MHz, Methanol- $d_4$ )  $\delta$  176.76, 172.60, 146.50, 145.47, 138.85, 135.69, 132.66, 130.45, 130.32, 126.75, 125.77, 125.73, 125.37, 124.44, 124.39, 115.82, 112.49, 57.49, 54.86, 50.49, 46.84, 46.14, 40.23, 28.33, 22.42, 18.61; HRMS (ESI) calcd for  $\text{C}_{28}\text{H}_{34}\text{N}_5\text{O}_2\text{S}$   $[\text{M}+\text{H}]^+$  504.2428, found 504.2431.

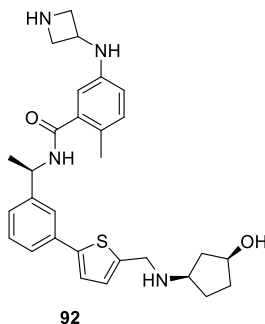

**5-(azetidin-3-ylamino)-N-((R)-1-(3-(5-(((1R,3S)-3-hydroxycyclopentyl)amino)methyl)thiophen-2-yl)phenyl)ethyl)-2-methylbenzamide (92).** White solid (yield 67%):  $[\alpha]_{546}^{25} = -6.8$  (c 0.8, MeOH);  $^1\text{H}$  NMR (400 MHz, Methanol- $d_4$ )  $\delta$  8.40 (s, 1H), 7.73 – 7.67 (m, 1H), 7.57 – 7.52 (m, 1H), 7.40 (dd,  $J$  = 6.8, 4.0 Hz, 3H), 7.28 (d,  $J$  = 3.7 Hz, 1H), 7.03 (d,  $J$  = 8.0 Hz, 1H), 6.61 – 6.55 (m, 2H), 5.21 (q,  $J$  = 7.0 Hz, 1H), 4.55 – 4.43 (m, 3H), 4.39 – 4.30 (m, 3H), 3.97 – 3.89 (m, 2H), 3.68 (tt,  $J$  = 8.0, 5.8 Hz, 1H), 2.30 – 2.12 (m, 5H), 2.05 – 1.93 (m, 1H), 1.89 – 1.82 (m, 3H), 1.55 (d,  $J$  = 7.0 Hz, 3H);  $^{13}\text{C}$  NMR (100 MHz, Methanol- $d_4$ )  $\delta$  172.60, 148.34, 146.62, 145.49, 138.84, 135.15, 132.95, 132.85, 132.64, 130.46, 126.98, 125.71, 125.60, 124.92, 124.77, 115.56, 112.81, 72.52, 58.47, 54.89, 50.55, 46.85, 45.14, 39.26, 34.40, 28.32, 22.35, 18.62; HRMS (ESI) calcd for  $\text{C}_{29}\text{H}_{37}\text{N}_4\text{O}_2\text{S}$   $[\text{M}+\text{H}]^+$  505.2632, found 505.2634.

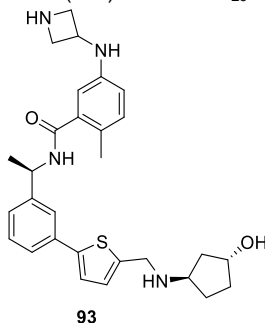

**5-(azetidin-3-ylamino)-N-((R)-1-(3-(5-(((1R,3R)-3-hydroxycyclopentyl)amino)methyl)thiophen-2-yl)phenyl)ethyl)-2-methylbenzamide (93).** White solid (yield 65%):  $[\alpha]_{546}^{25} = -3.2$  (c 2.3, MeOH);  $^1\text{H}$  NMR (400 MHz, Methanol- $d_4$ )  $\delta$  8.42 (s, 1H), 7.69 (d,  $J$  = 1.9 Hz, 1H), 7.57 – 7.52 (m, 1H), 7.43 – 7.36 (m, 3H), 7.28 (d,  $J$  = 3.7 Hz, 1H), 7.03 (d,  $J$  = 8.0 Hz, 1H), 6.60 – 6.54 (m, 2H), 5.21 (q,  $J$  = 7.0 Hz, 1H), 4.55 – 4.31 (m, 6H), 3.98 – 3.90 (m, 2H), 3.89 – 3.80 (m, 1H), 2.39 – 2.27 (m, 1H), 2.23 – 2.13 (m, 4H), 2.11 – 2.02 (m, 1H), 1.92 – 1.83 (m, 1H), 1.80 – 1.67 (m, 2H), 1.55 (d,  $J$  = 7.0 Hz, 3H).  $^{13}\text{C}$  NMR (100 MHz, Methanol- $d_4$ )  $\delta$  172.59, 148.27, 146.61, 145.49, 138.86, 135.17, 133.08, 132.80, 132.64, 130.45, 126.99, 125.73, 125.61, 124.91, 124.75, 115.57, 112.81, 72.45, 58.26, 54.90, 50.54, 46.86, 45.39, 39.88, 34.12, 28.21, 22.34, 18.62; HRMS (ESI) calcd for  $\text{C}_{29}\text{H}_{37}\text{N}_4\text{O}_2\text{S}$   $[\text{M}+\text{H}]^+$  505.2632, found 505.2636.

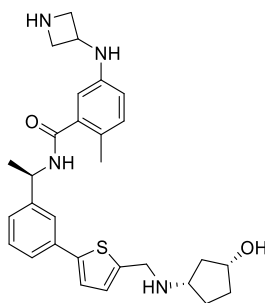

94

**5-(azetidin-3-ylamino)-N-((R)-1-(3-(5-(((1S,3R)-3-hydroxycyclopentyl)amino)methyl)thiophen-2-yl)phenyl)ethyl)-2-methylbenzamide (94).** White solid (yield 72%):  $[\alpha]_{546}^{25} = +12.9$  (c 0.4, MeOH);  $^1\text{H NMR}$  (400 MHz, Methanol- $d_4$ )  $\delta$  8.45 (s, 1H), 7.72 – 7.67 (m, 1H), 7.58 – 7.51 (m, 1H), 7.44 – 7.38 (m, 3H), 7.26 (d,  $J = 3.7$  Hz, 1H), 7.03 (d,  $J = 8.1$  Hz, 1H), 6.61 – 6.54 (m, 2H), 5.21 (q,  $J = 7.0$  Hz, 1H), 4.50 (p,  $J = 7.0$  Hz, 1H), 4.43 (s, 2H), 4.35 (dt,  $J = 8.8, 6.3$  Hz, 3H), 3.93 (dd,  $J = 11.1, 6.6$  Hz, 2H), 3.71 – 3.62 (m, 1H), 2.29 – 2.12 (m, 5H), 2.04 – 1.92 (m, 1H), 1.89 – 1.80 (m, 3H), 1.55 (d,  $J = 7.1$  Hz, 3H);  $^{13}\text{C NMR}$  (100 MHz, Methanol- $d_4$ )  $\delta$  172.60, 148.23, 146.61, 145.49, 138.89, 135.18, 133.26, 132.74, 132.64, 130.46, 126.92, 125.72, 125.60, 124.98, 124.76, 115.57, 112.79, 72.57, 58.51, 54.93, 50.55, 46.88, 45.24, 39.38, 34.43, 28.44, 22.33, 18.61; HRMS (ESI) calcd for  $\text{C}_{29}\text{H}_{37}\text{N}_4\text{O}_2\text{S}$   $[\text{M}+\text{H}]^+$  505.2632, found 505.2638.

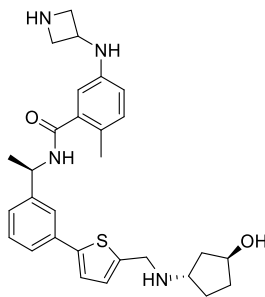

95

**5-(azetidin-3-ylamino)-N-((R)-1-(3-(5-(((1S,3S)-3-hydroxycyclopentyl)amino)methyl)thiophen-2-yl)phenyl)ethyl)-2-methylbenzamide (95).** White solid (yield 72%):  $[\alpha]_{546}^{25} = -3.2$  (c 1.4, MeOH);  $^1\text{H NMR}$  (400 MHz, Methanol- $d_4$ )  $\delta$  8.43 (s, 1H), 7.71 – 7.68 (m, 1H), 7.57 – 7.52 (m, 1H), 7.44 – 7.37 (m, 3H), 7.27 (d,  $J = 3.7$  Hz, 1H), 7.03 (d,  $J = 8.0$  Hz, 1H), 6.61 – 6.53 (m, 2H), 5.21 (q,  $J = 7.0$  Hz, 1H), 4.51 (p,  $J = 7.0$  Hz, 1H), 4.45 (s, 2H), 4.40 – 4.30 (m, 3H), 3.99 – 3.90 (m, 2H), 3.72 – 3.64 (m, 1H), 2.29 – 2.11 (m, 5H), 2.04 – 1.93 (m, 1H), 1.89 – 1.81 (m, 3H), 1.55 (d,  $J = 7.1$  Hz, 3H);  $^{13}\text{C NMR}$  (100 MHz, Methanol- $d_4$ )  $\delta$  172.59, 148.31, 146.62, 145.49, 138.86, 135.16, 132.98, 132.89, 132.64, 130.46, 126.97, 125.73, 125.60, 124.95, 124.77, 115.57, 112.82, 72.55, 58.51, 54.93, 50.55, 46.87, 45.19, 39.31, 34.41, 28.36, 22.34, 18.62; HRMS (ESI) calcd for  $\text{C}_{29}\text{H}_{37}\text{N}_4\text{O}_2\text{S}$   $[\text{M}+\text{H}]^+$  505.2632, found 505.2636.

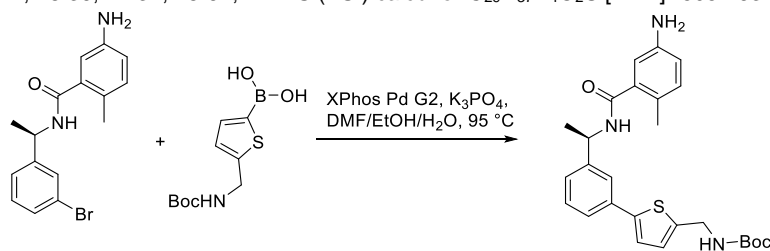

96

**(R)-3-((1-(3-(5-(((tert-butoxycarbonyl)amino)methyl)thiophen-2-yl)phenyl)ethyl)carbamoyl)-4-methylbenzenaminium (96).** A flask fitted with a rubber septum was charged with (R)-5-amino-N-(1-(3-bromophenyl)ethyl)-2-methylbenzamide (33 mg, 0.10 mmol), (5-(((tert-butoxycarbonyl)amino)methyl)thiophen-2-yl)boronic acid (39 mg, 0.15 mmol), XPhos Pd G2 (8 mg, 0.01 mmol),  $\text{K}_3\text{PO}_4$  (64 mg, 0.3 mmol), DMF/EtOH/ $\text{H}_2\text{O}$  (1 mL/ 1 mL/ 0.5 mL) and then purged with argon. The mixture was stirred at 95 °C overnight. The reaction mixture was then cooled to room temperature, diluted with ethyl acetate (20 mL), filtered through celite and concentrated in vacuo. The purification by Prep-HPLC afforded the product **96** (41 mg, yield 88%) as a white solid:  $[\alpha]_{546}^{25} = +22.6$  (c 1.5, MeOH);  $^1\text{H NMR}$  (400 MHz,  $\text{CDCl}_3$ )  $\delta$  7.57 – 7.54 (m, 1H), 7.49 – 7.45 (m, 1H), 7.37 – 7.33 (m, 1H), 7.29 – 7.27 (m, 1H), 7.13 (d,  $J = 3.6$  Hz, 1H), 6.97 (d,  $J = 8.1$  Hz, 1H), 6.90 (d,  $J = 3.6$  Hz, 1H), 6.70 (d,  $J = 2.5$  Hz, 1H), 6.63 (dd,  $J = 8.1, 2.6$  Hz, 1H), 6.00 (d,  $J = 8.0$  Hz, 1H), 5.36 – 5.27 (m, 1H), 4.46 (d,  $J = 5.9$  Hz, 2H), 2.30 (s, 3H), 1.59 (d,  $J = 6.9$  Hz, 3H), 1.47 (s, 9H);  $^{13}\text{C NMR}$  (100 MHz,  $\text{CDCl}_3$ )  $\delta$  169.44, 144.35, 144.05, 143.80, 141.83, 137.19, 134.94, 132.00, 129.43, 126.58, 125.39, 124.94, 123.72, 123.06, 116.83, 113.57, 49.03, 39.95, 28.54, 22.01, 18.90; HRMS (ESI) calcd for  $\text{C}_{26}\text{H}_{32}\text{N}_3\text{O}_3\text{S}$   $[\text{M}+\text{H}]^+$  466.2159, found 466.2157.

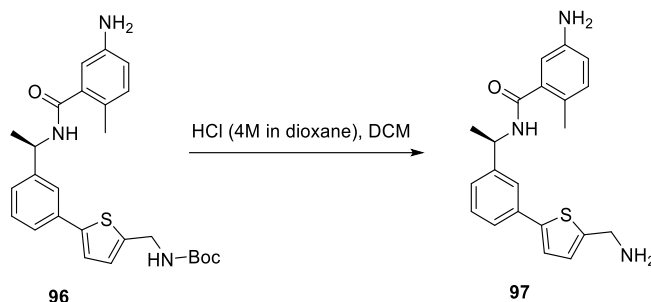

**(R)-5-amino-N-(1-(3-(5-(aminomethyl)thiophen-2-yl)phenyl)ethyl)-2-methylbenzamide (97)**. Compound **96** (20 mg, 0.04 mmol) was subjected to general N-Boc deprotection procedure with HCl (4M in dioxane, 100  $\mu$ L) and DCM (2 mL). The purification by Prep-HPLC afforded the product **97** (14 mg, yield 89%) as a white solid:  $[\alpha]_{546}^{25} = -2.4$  (c 2.0, MeOH);  $^1\text{H NMR}$  (400 MHz, Methanol- $d_4$ )  $\delta$  7.71 (q,  $J = 1.5$  Hz, 1H), 7.59 – 7.53 (m, 1H), 7.45 – 7.35 (m, 6H), 7.26 – 7.22 (m, 1H), 5.25 (q,  $J = 7.0$  Hz, 1H), 4.36 (s, 2H), 2.37 (s, 3H), 1.59 (d,  $J = 7.1$  Hz, 3H);  $^{13}\text{C NMR}$  (100 MHz, Methanol- $d_4$ )  $\delta$  170.32, 147.64, 146.27, 139.89, 137.97, 135.35, 134.91, 133.53, 131.71, 130.52, 129.57, 126.86, 125.71, 125.18, 124.94, 124.73, 122.66, 50.78, 38.85, 22.27, 19.19; HRMS (ESI) calcd for  $\text{C}_{21}\text{H}_{23}\text{N}_3\text{OS}$   $[\text{M}+\text{H}]^+$  366.1635, found 366.1635

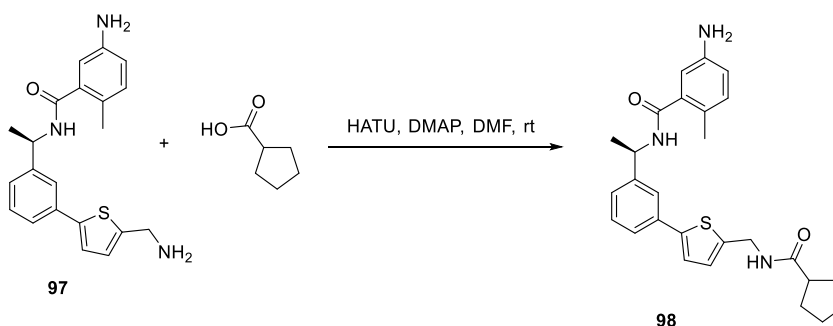

**(R)-5-amino-N-(1-(3-(5-(cyclopentanecarboxamidomethyl)thiophen-2-yl)phenyl)ethyl)-2-methylbenzamide (98)**. **97** (20 mg, 0.05 mmol), cyclopentanecarboxylic acid (6 mg, 0.05 mmol), HATU (19 mg, 0.05 mmol), and DMAP (18 mg, 0.15 mmol) was subjected to general amine coupling procedure with DMF (2 mL). The purification by Prep-HPLC gave the product **98** (20 mg, yield 87%) as a white solid:  $[\alpha]_{546}^{25} = +23.5$  (c 0.8, MeOH);  $^1\text{H NMR}$  (400 MHz, Methanol- $d_4$ )  $\delta$  7.66 – 7.61 (m, 1H), 7.50 – 7.45 (m, 1H), 7.38 – 7.28 (m, 2H), 7.22 (d,  $J = 3.6$  Hz, 1H), 6.98 – 6.91 (m, 2H), 6.74 – 6.66 (m, 2H), 5.24 – 5.14 (m, 1H), 4.53 – 4.49 (m, 2H), 2.65 (ddd,  $J = 13.3, 10.5, 7.5$  Hz, 1H), 2.20 (s, 3H), 1.91 – 1.82 (m, 2H), 1.80 – 1.69 (m, 4H), 1.65 – 1.56 (m, 2H), 1.53 (d,  $J = 7.1$  Hz, 3H);  $^{13}\text{C NMR}$  (100 MHz, Methanol- $d_4$ )  $\delta$  178.96, 172.83, 146.46, 146.32, 144.88, 143.02, 138.53, 136.03, 132.29, 130.17, 127.60, 126.34, 125.44, 125.17, 124.28, 123.80, 118.01, 115.04, 50.39, 46.46, 39.13, 31.43, 27.02, 22.42, 18.67; HRMS (ESI) calcd for  $\text{C}_{27}\text{H}_{32}\text{N}_3\text{O}_2\text{S}$   $[\text{M}+\text{H}]^+$  462.2210, found 462.2214.

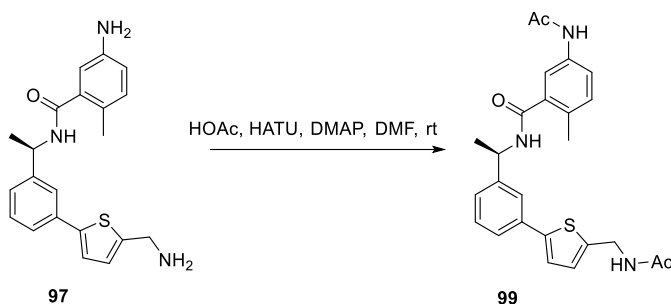

**(R)-5-acetamido-N-(1-(3-(5-(acetamidomethyl)thiophen-2-yl)phenyl)ethyl)-2-methylbenzamide (99)**. **97** (20 mg, 0.05 mmol), HOAc (6 mg, 0.10 mmol), HATU (19 mg, 0.05 mmol), and DMAP (18 mg, 0.15 mmol) was subjected to general amine coupling procedure with DMF (2 mL). The purification by Prep-HPLC gave the compound **99** (17 mg, yield 76%) as a white solid:  $^1\text{H NMR}$  (400 MHz, Methanol- $d_4$ )  $\delta$  7.66 – 7.63 (m, 1H), 7.58 (d,  $J = 2.3$  Hz, 1H), 7.50 – 7.43 (m, 2H), 7.38 – 7.30 (m, 2H), 7.23 (d,  $J = 3.6$  Hz, 1H), 7.17 (d,  $J = 8.3$  Hz, 1H), 6.96 – 6.92 (m, 1H), 5.21 (q,  $J = 7.0$  Hz, 1H), 4.51 (d,  $J = 0.9$  Hz, 2H), 2.29 (s, 3H), 2.10 (s, 3H), 1.97 (s, 3H), 1.55 (d,  $J = 7.1$  Hz, 3H);  $^{13}\text{C NMR}$  (100 MHz, Methanol- $d_4$ )  $\delta$  172.93, 171.89, 171.72, 146.21, 144.94, 142.48, 138.31, 137.56, 136.02, 132.27, 132.05, 130.24, 127.87, 126.32, 125.25, 124.32, 123.91, 122.43, 119.89, 50.50, 39.14, 23.72, 22.50, 22.40, 19.06; HRMS (ESI) calcd for  $\text{C}_{25}\text{H}_{28}\text{N}_3\text{O}_3\text{S}$   $[\text{M}+\text{H}]^+$  450.1846, found 450.1852.



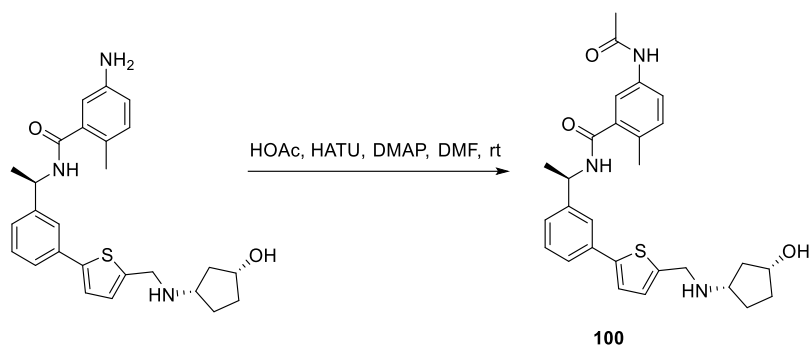

**5-acetamido-N-((R)-1-(3-(5-(((1S,3R)-3-hydroxycyclopentyl)amino)methyl)thiophen-2-yl)phenyl)ethyl)-2-methylbenzamide (100).** 5-amino-N-((R)-1-(3-(5-(((1S,3R)-3-hydroxycyclopentyl)amino)methyl)thiophen-2-yl)phenyl)ethyl)-2-methylbenzamide (23 mg, 0.05 mmol), HOAc (3 mg, 0.05 mmol), HATU (19 mg, 0.05 mmol), and DMAP (18 mg, 0.15 mmol) was subjected to general amine coupling procedure with DMF (2 mL). The purification by Prep-HPLC gave the compound **100** (17 mg, yield 76%) as a white solid:  $[\alpha]_{546}^{25} = -18.7$  (c 0.5, MeOH);  $^1\text{H NMR}$  (400 MHz, Methanol- $d_4$ )  $\delta$  8.36 (s, 1H), 7.73 – 7.66 (m, 2H), 7.58 – 7.53 (m, 1H), 7.44 – 7.36 (m, 4H), 7.27 (d,  $J = 3.7$  Hz, 1H), 7.18 (d,  $J = 8.2$  Hz, 1H), 5.22 (q,  $J = 7.0$  Hz, 1H), 4.45 (s, 2H), 4.33 (p,  $J = 4.0$  Hz, 1H), 3.68 (p,  $J = 7.0$  Hz, 1H), 2.30 (s, 3H), 2.27 – 2.14 (m, 2H), 2.12 (s, 3H), 2.03 – 1.92 (m, 1H), 1.89 – 1.80 (m, 3H), 1.56 (d,  $J = 7.0$  Hz, 3H);  $^{13}\text{C NMR}$  (100 MHz, Methanol- $d_4$ )  $\delta$  171.96, 171.77, 148.41, 146.57, 138.25, 137.60, 135.14, 132.97, 132.74, 132.29, 132.08, 130.49, 126.96, 125.56, 124.83, 124.80, 122.41, 119.91, 72.52, 58.47, 50.53, 45.17, 39.27, 34.42, 28.32, 23.74, 22.35, 19.05; HRMS (ESI) calcd for  $\text{C}_{28}\text{H}_{34}\text{N}_3\text{O}_3\text{S}$   $[\text{M}+\text{H}]^+$  492.2315, found 492.2319.

**Abbreviations list**

| <b>Abbreviation</b> | <b>Name</b>                                              |
|---------------------|----------------------------------------------------------|
| aq.                 | Aqueous solution                                         |
| Ar                  | Argon                                                    |
| Boc                 | tert-Butyloxycarbonyl                                    |
| DCM                 | Dichloromethane                                          |
| DMAP                | 4,4-Dimethylaminopyridine                                |
| DMF                 | Dimethylformamide                                        |
| DIPEA               | N,N-Diisopropylethylamine                                |
| EtOAc or EA         | Ethyl acetate                                            |
| equiv. or eq.       | Equivalent                                               |
| Et                  | Ethyl                                                    |
| ESI                 | Electron spray ionization                                |
| HATU                | Hexafluorophosphate azabenzotriazole tetramethyl uronium |
| HOAc                | Acetic acid                                              |
| HRMS                | High-resolution mass spectrometry                        |
| LRMS                | Low-resolution mass spectrometry                         |
| m/z                 | Ratio of mass to charge                                  |
| Me                  | Methyl                                                   |
| MeCN                | Acetonitrile                                             |
| NMR                 | Nuclear magnetic resonance                               |
| rt                  | Room temperature                                         |
| TEA                 | Triethanolamine                                          |

## References

1. Ghosh, A. K.; Takayama, J.; Aubin, Y.; Ratia, K.; Chaudhuri, R.; Baez, Y.; Sleeman, K.; Coughlin, M.; Nichols, D. B.; Mulhearn, D. C.; Prabhakar, B. S.; Baker, S. C.; Johnson, M. E.; Mesecar, A. D., Structure-Based Design, Synthesis, and Biological Evaluation of a Series of Novel and Reversible Inhibitors for the Severe Acute Respiratory Syndrome–Coronavirus Papain-Like Protease. *Journal of Medicinal Chemistry* **2009**, *52* (16), 5228-5240.
2. Robak, M. T.; Herbage, M. A.; Ellman, J. A., Synthesis and Applications of tert-Butanesulfinamide. *Chemical Reviews* **2010**, *110* (6), 3600-3740.

## NMR Spectra

## Compound 101

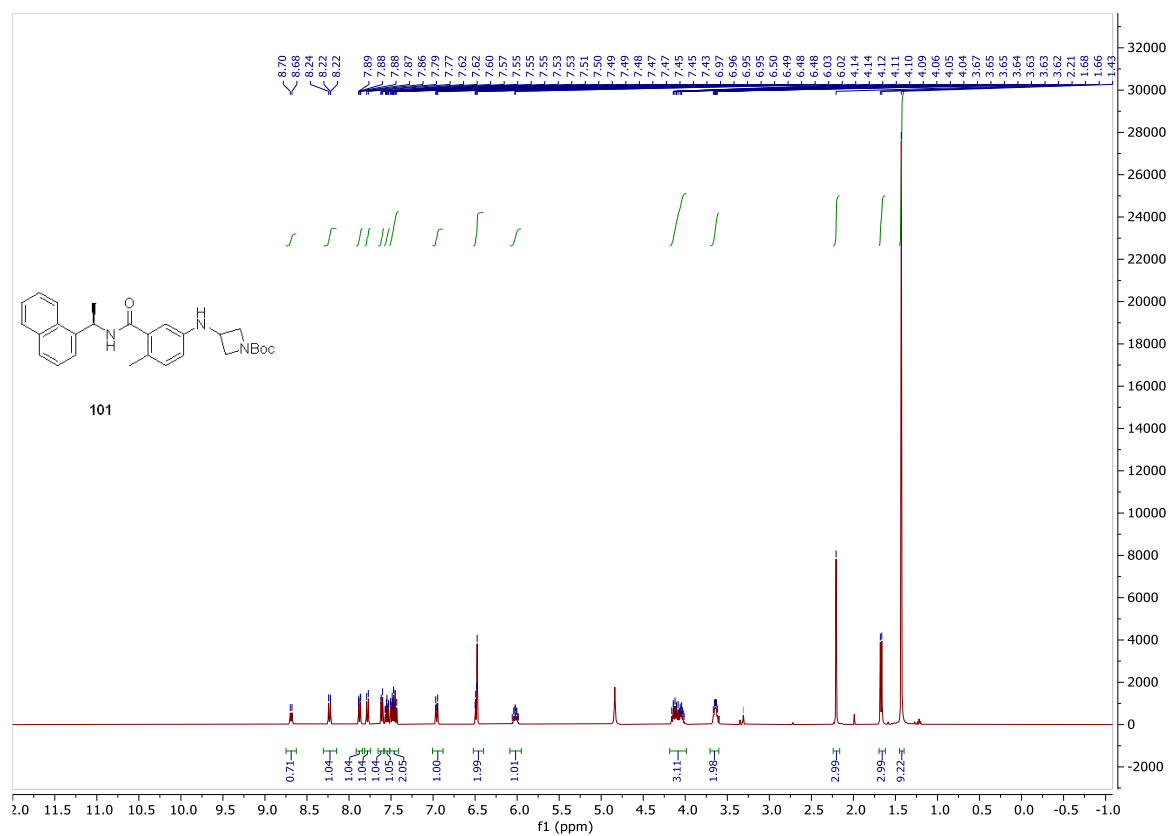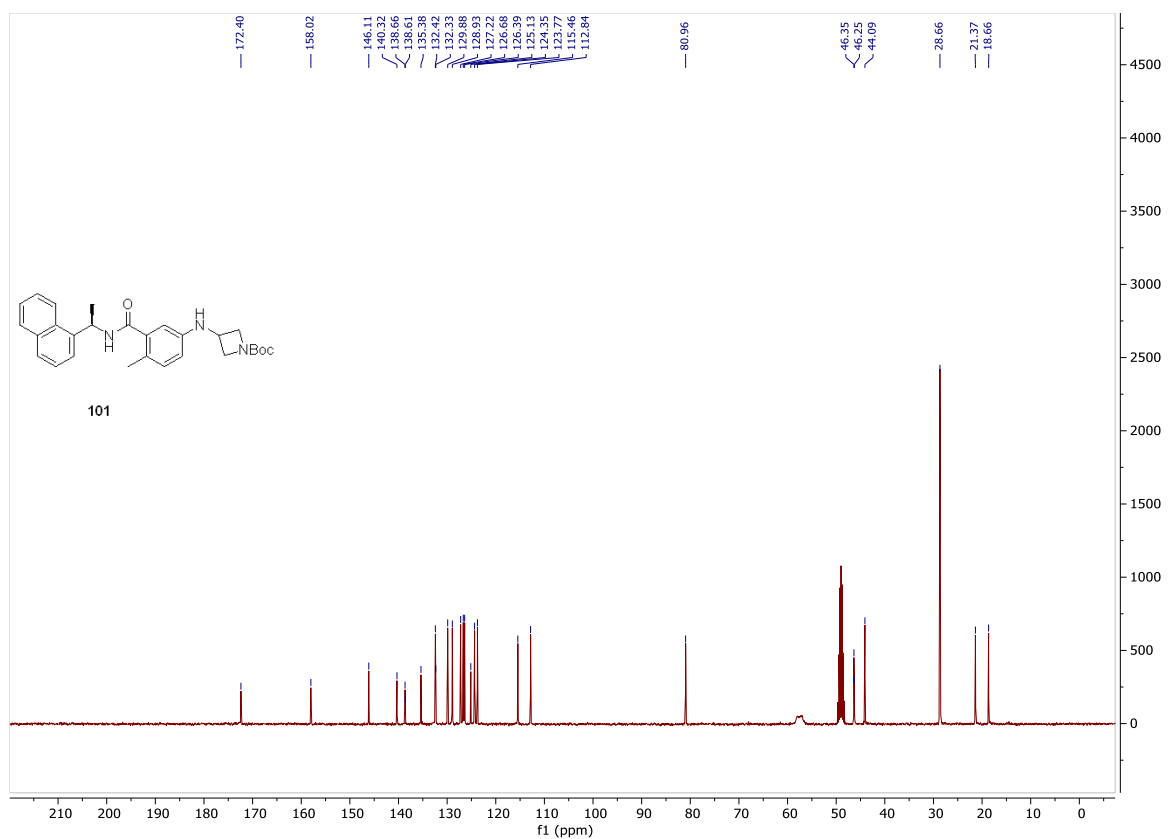

## Compound 2

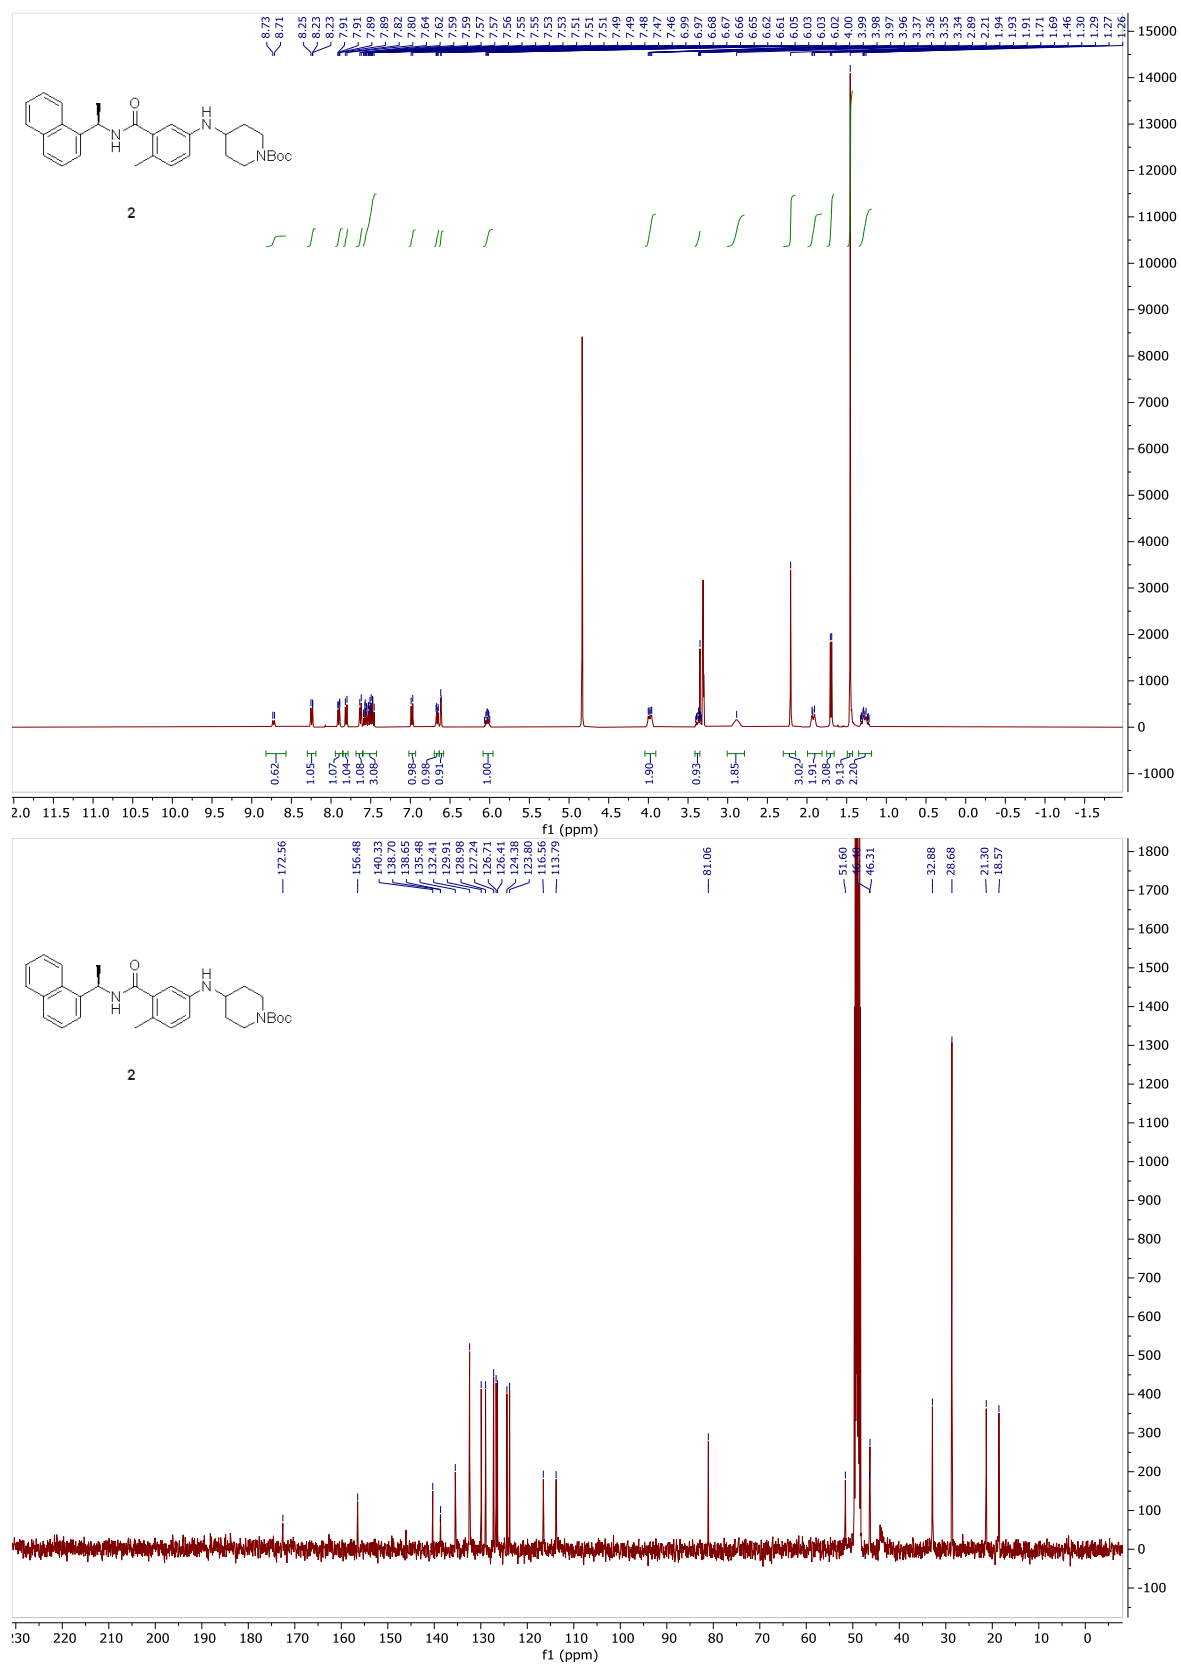

## Compound 3

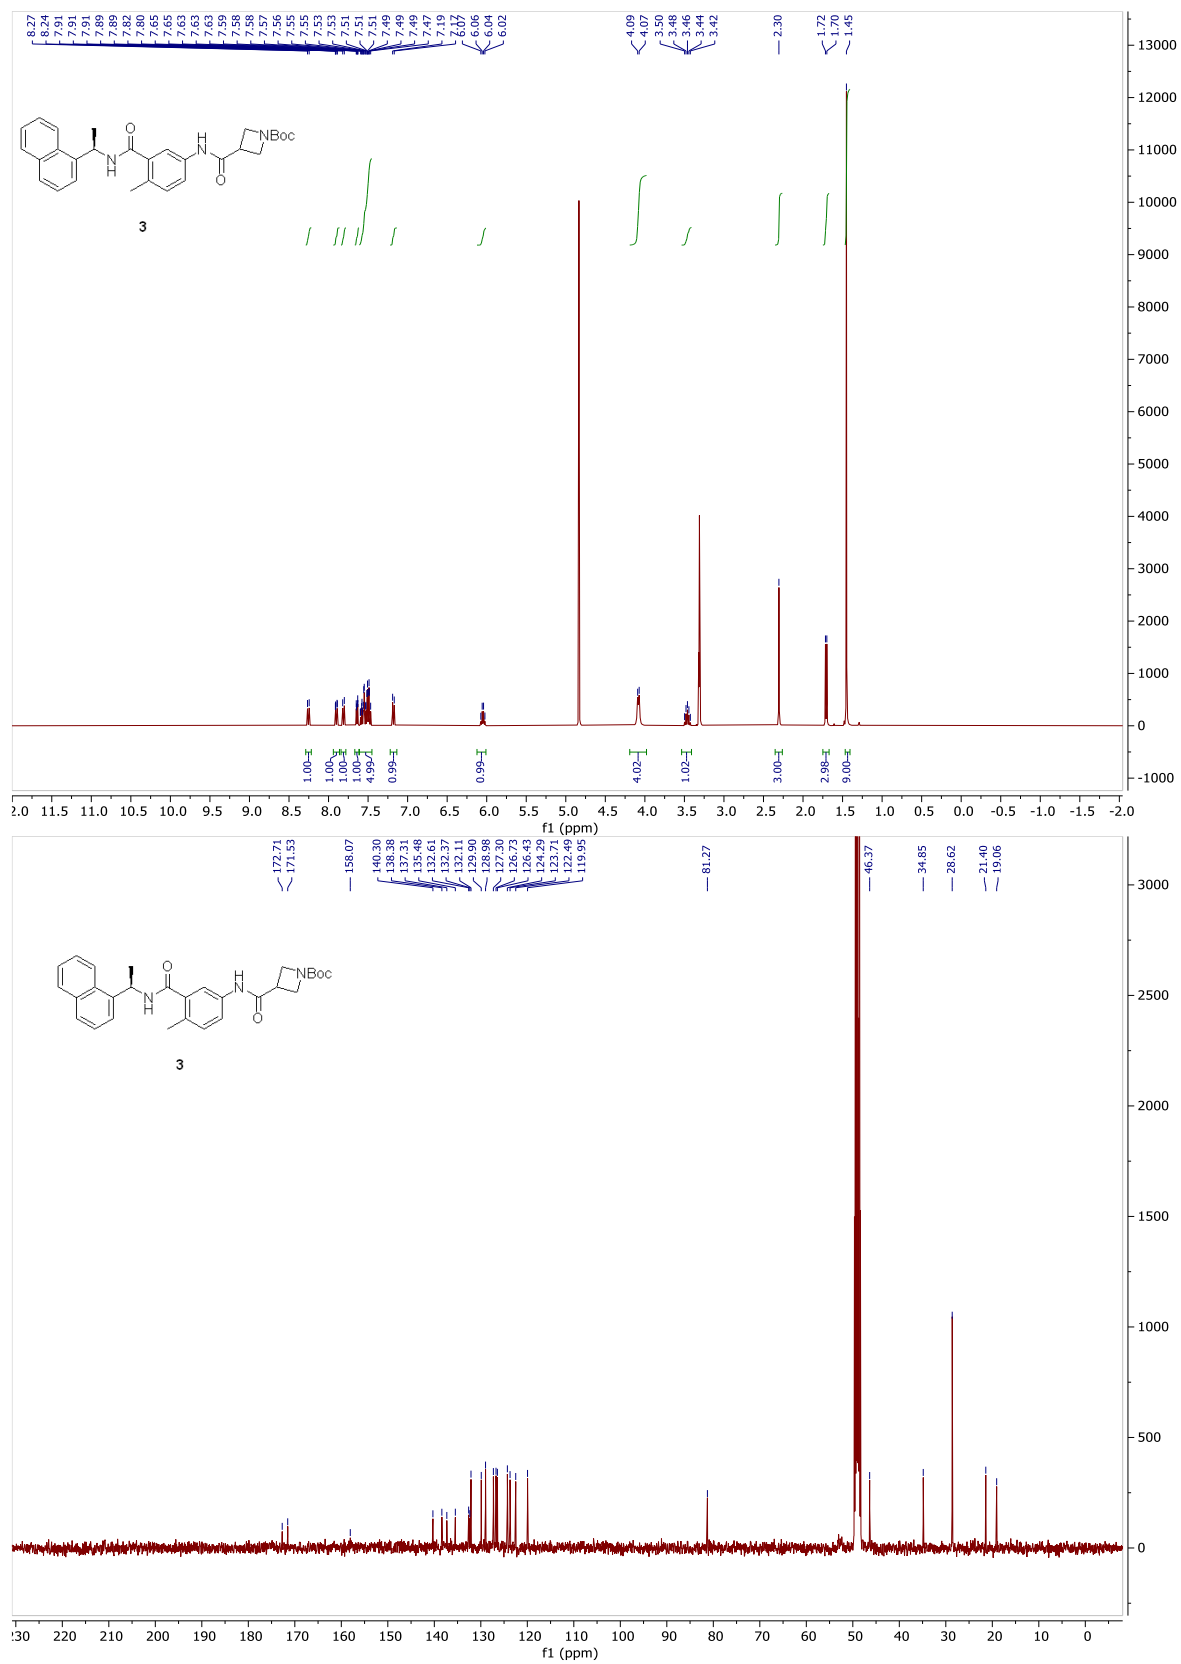

## Compound 4

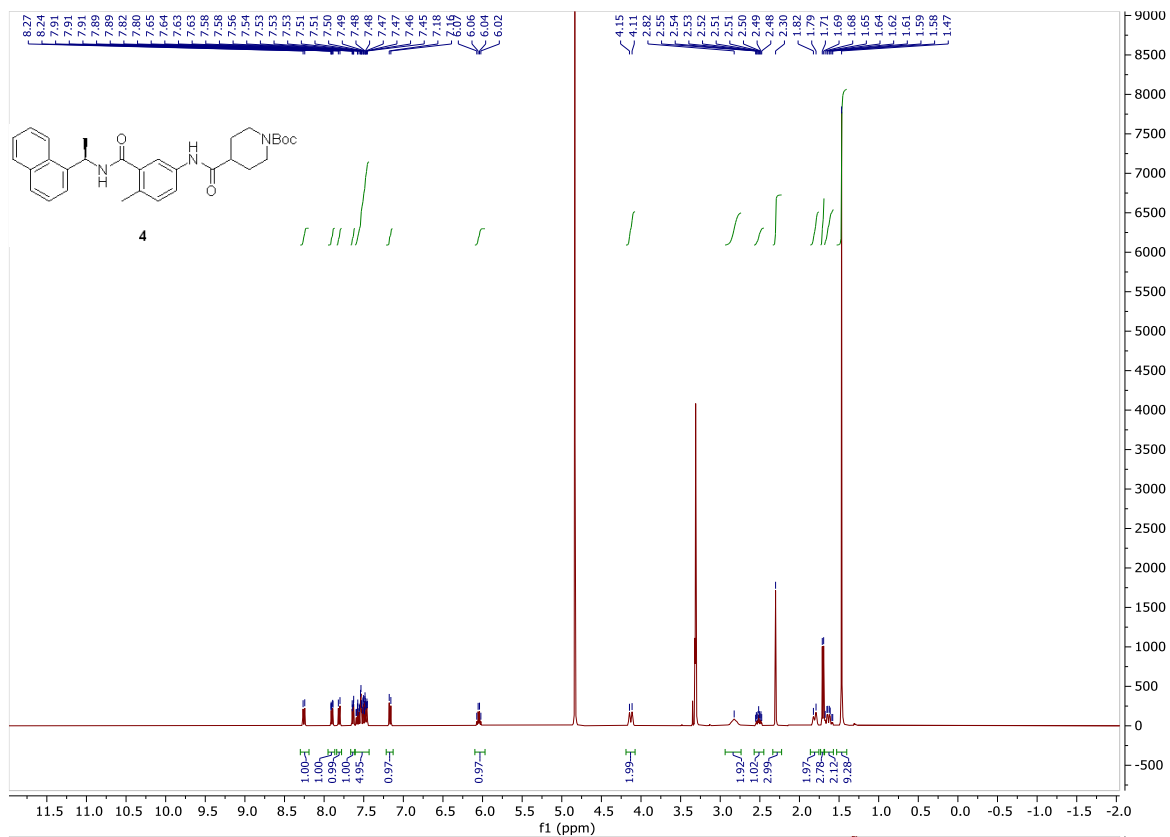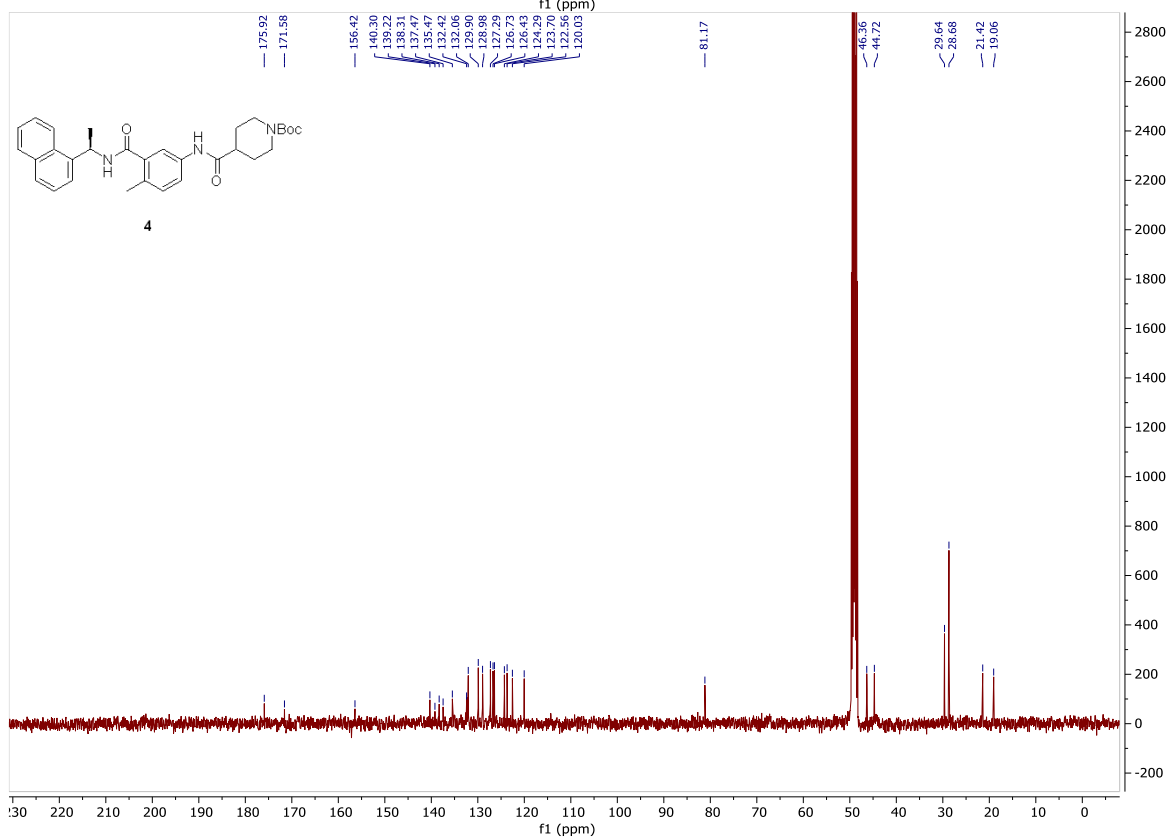

## Compound 5

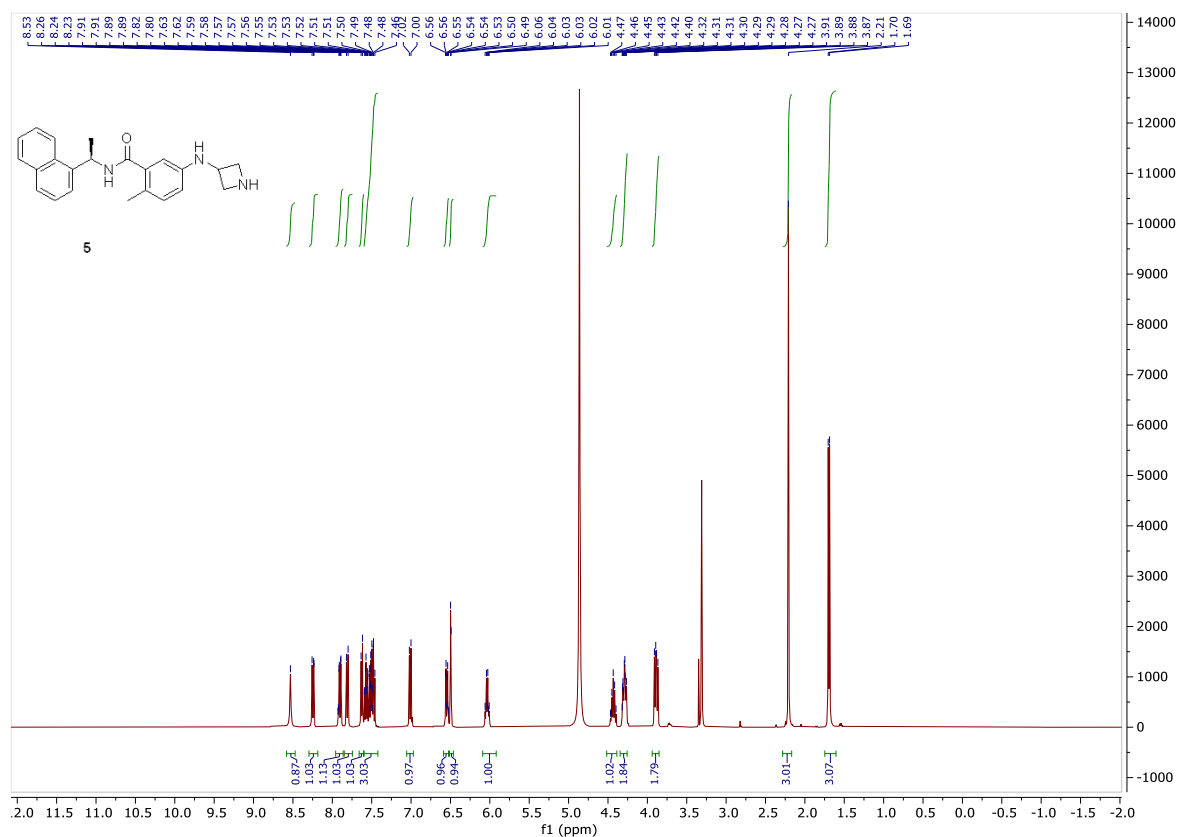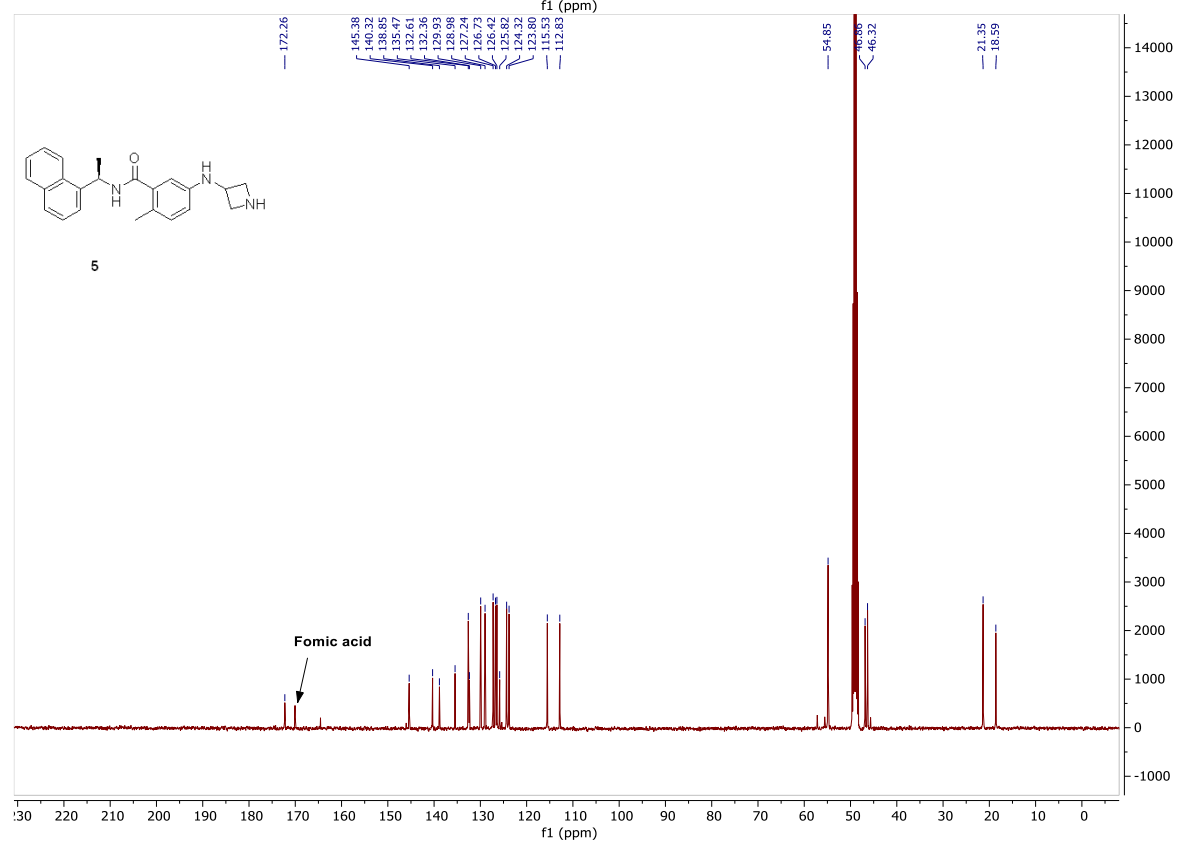



## Compound 6

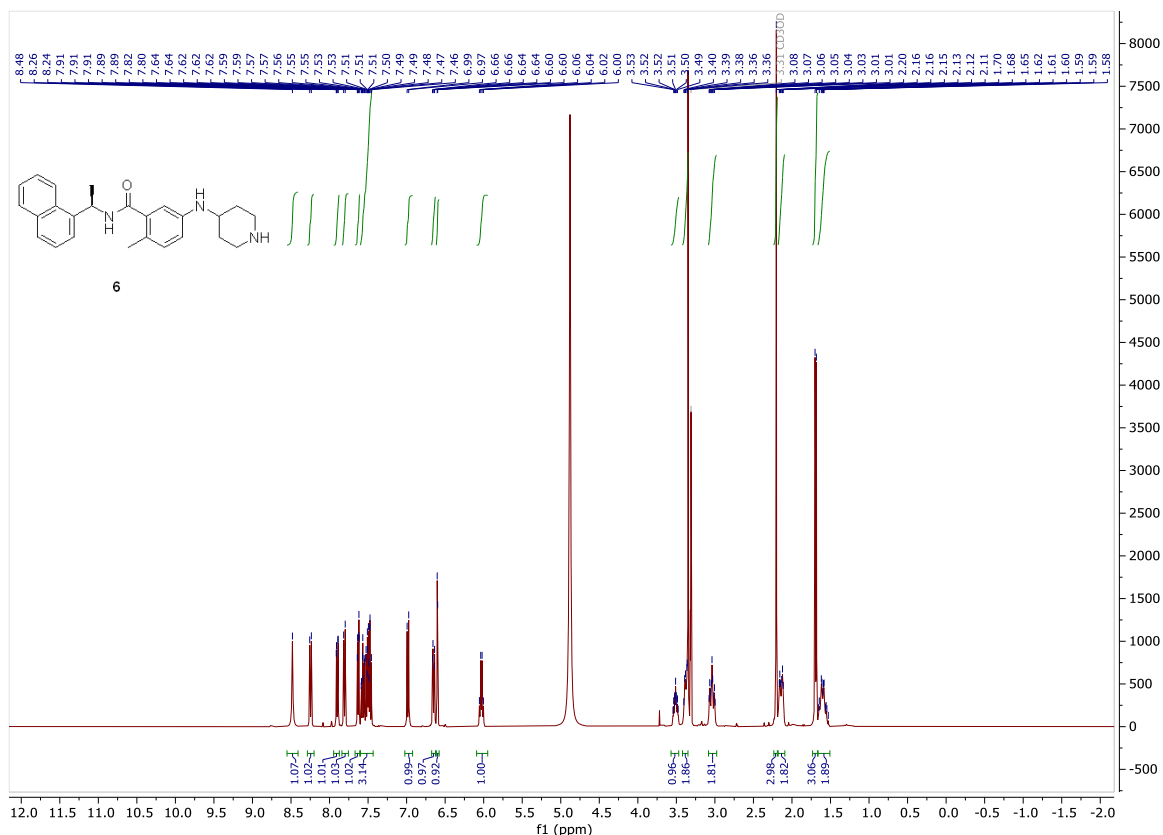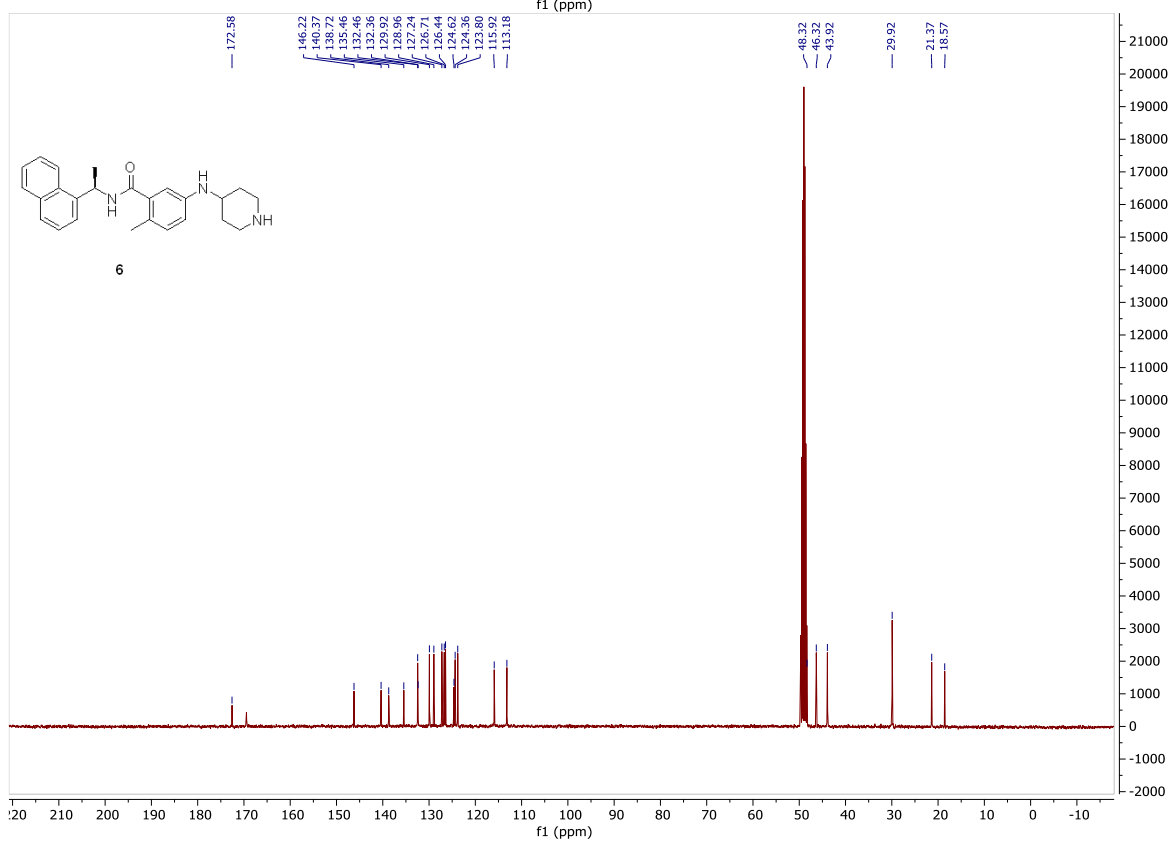

## Compound 8

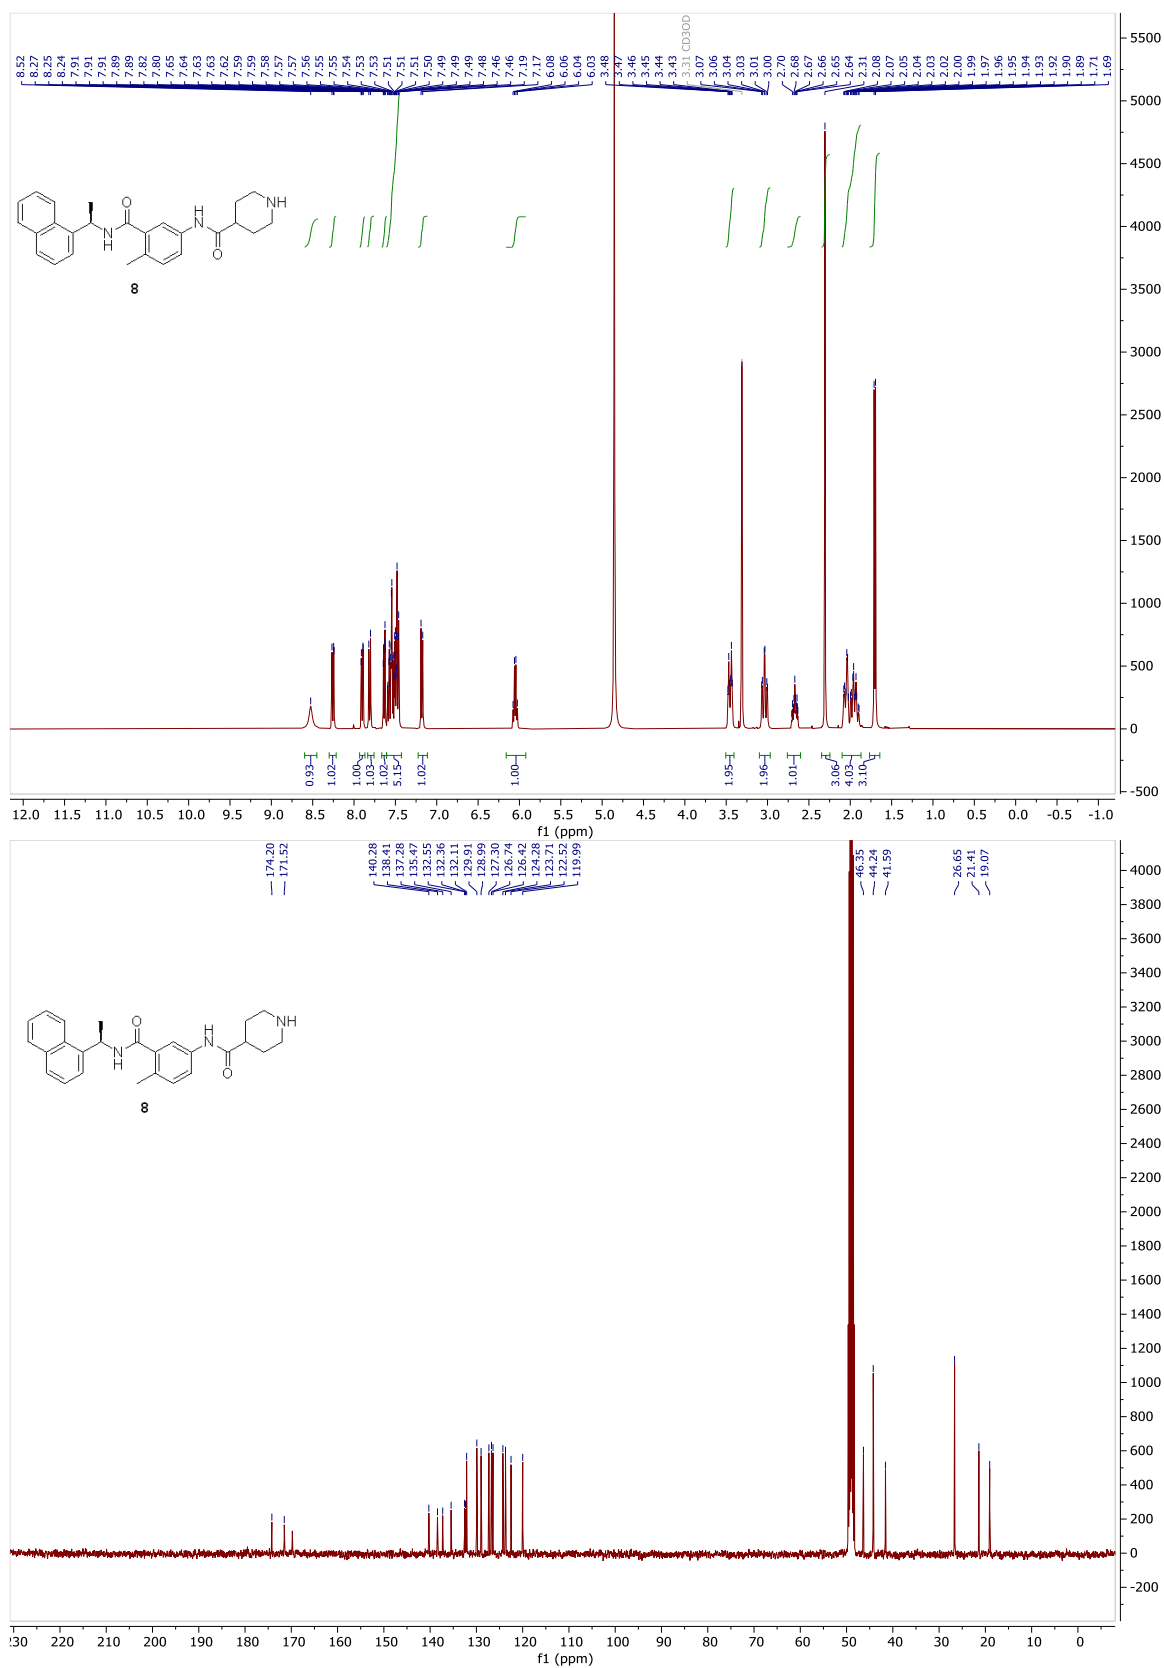

## Compound 9

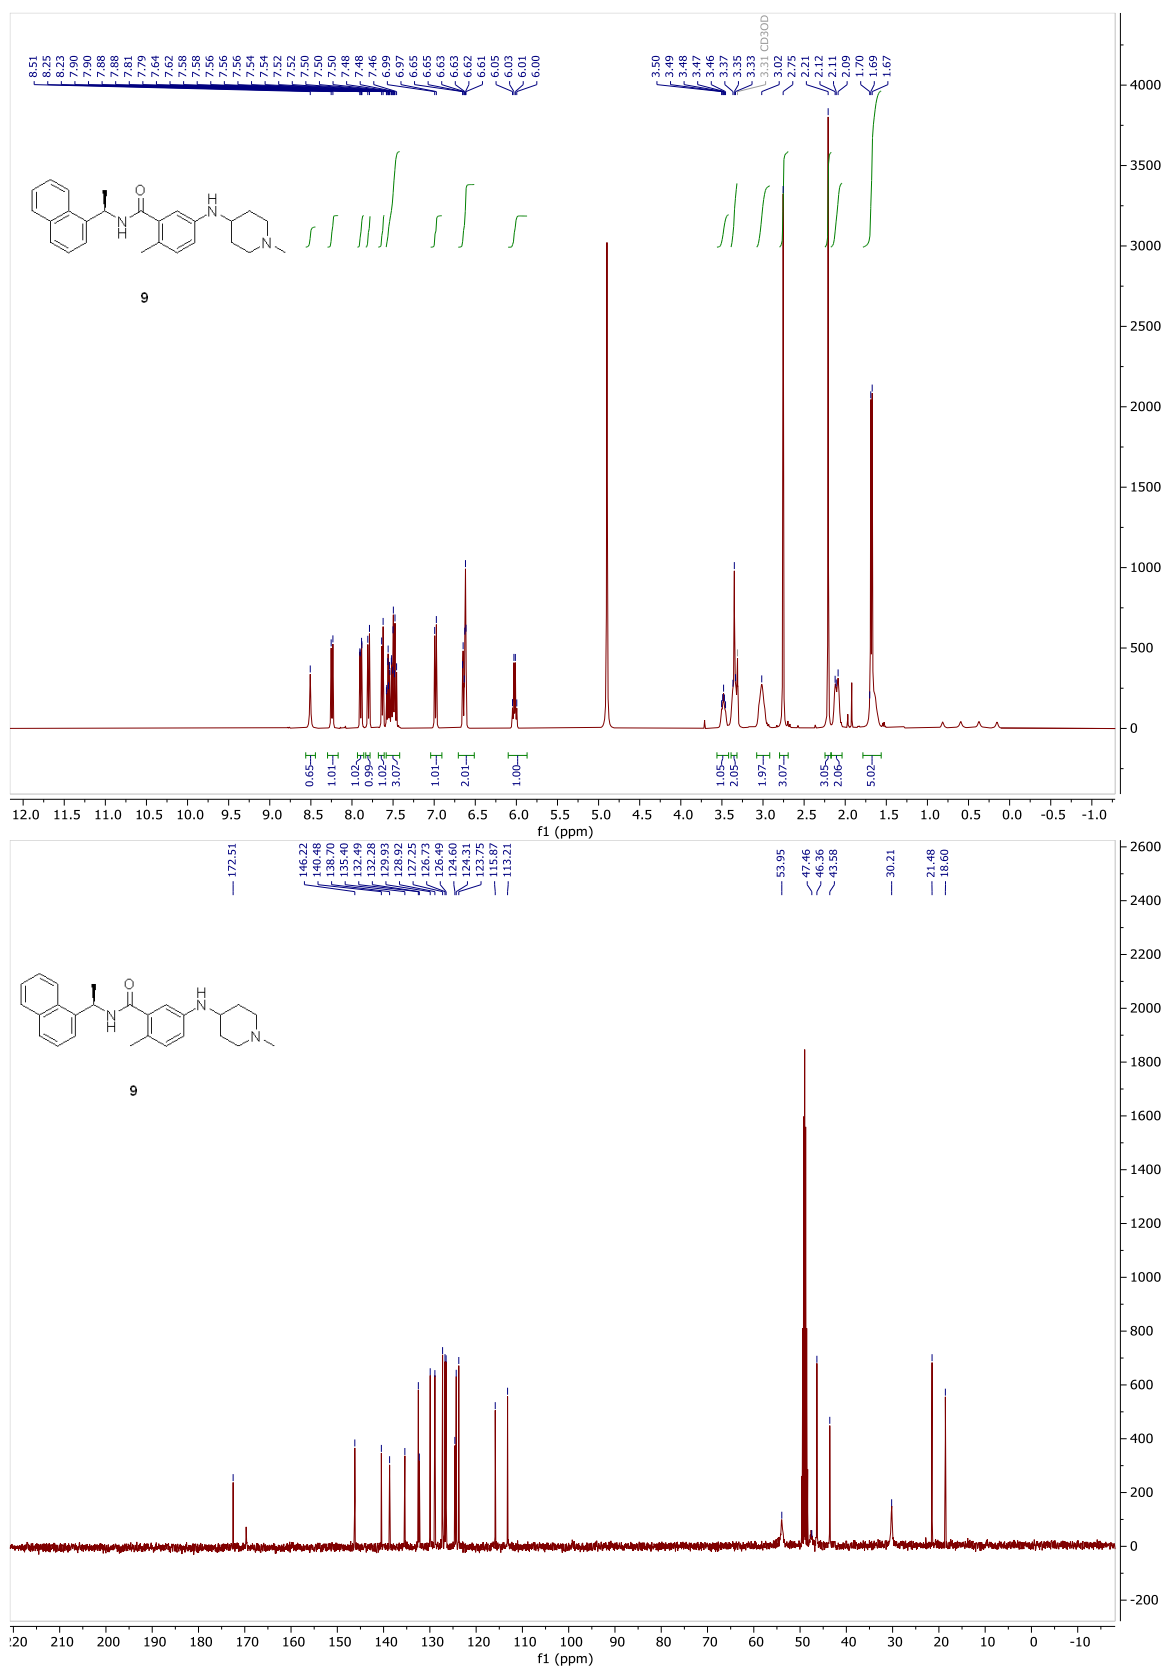

## Compound 10

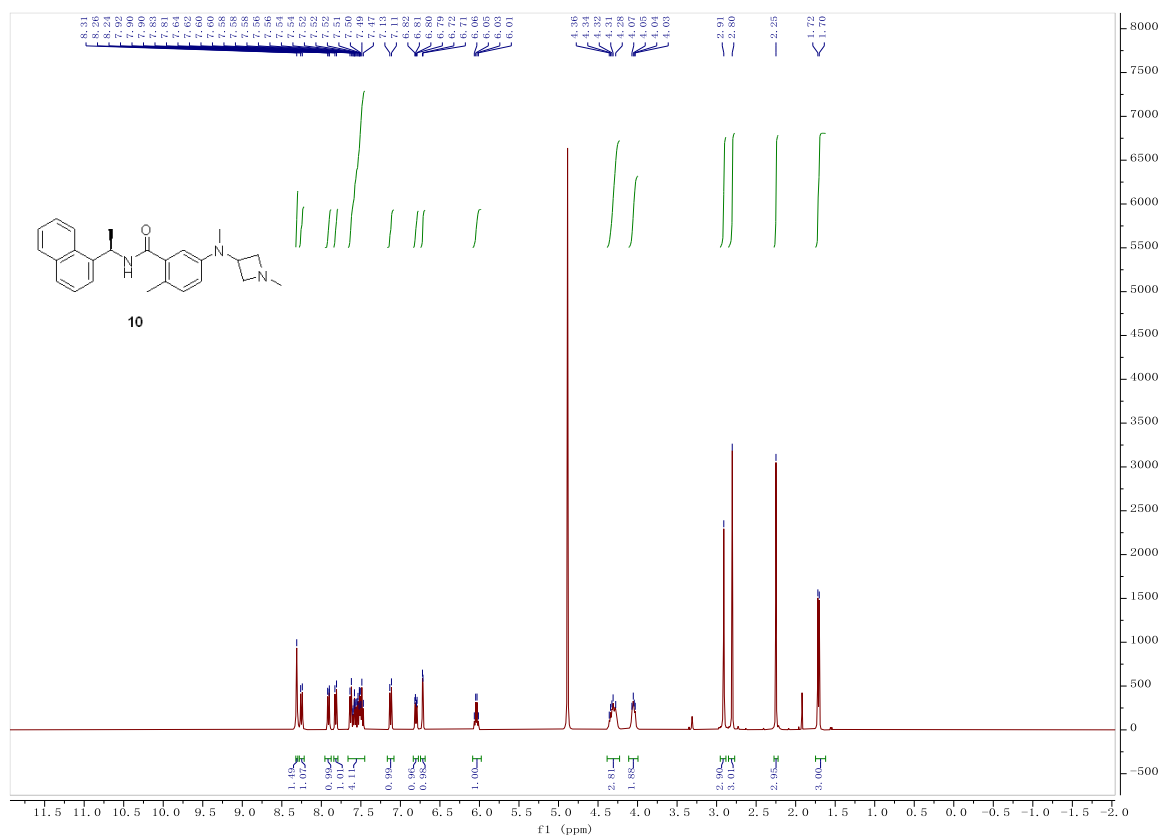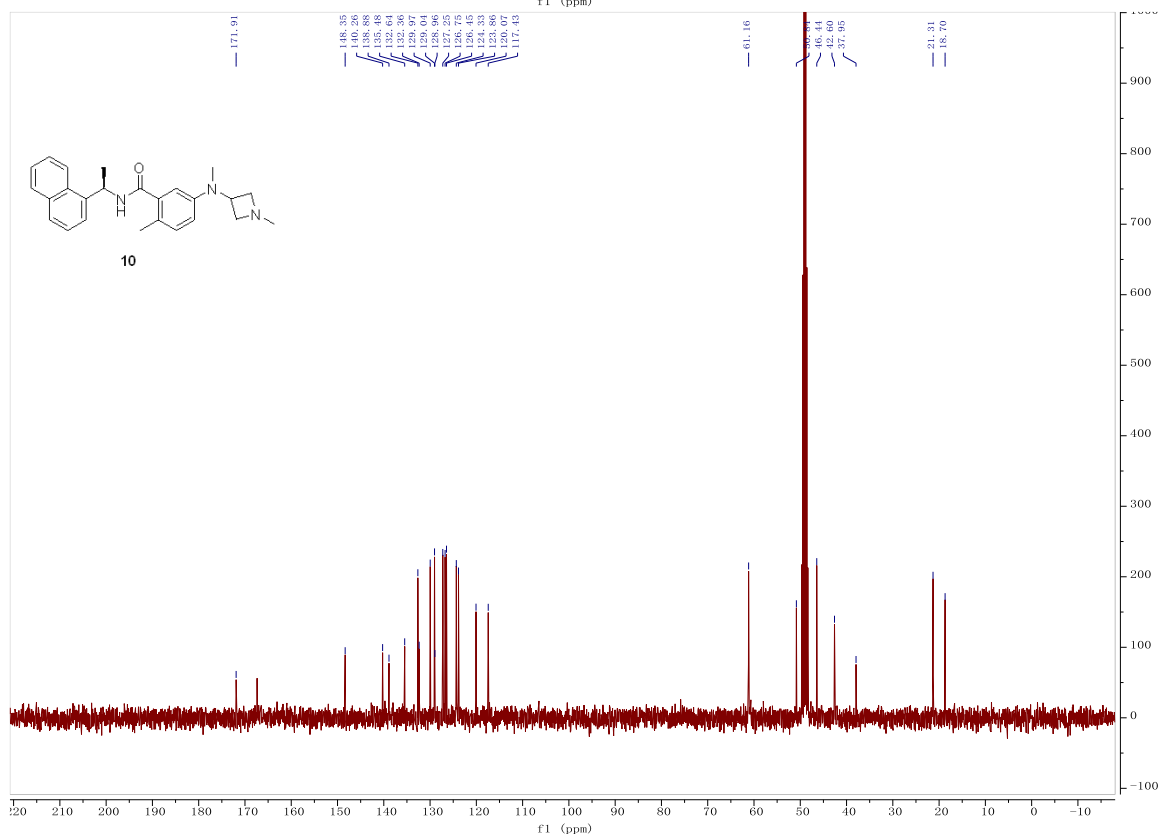

## Compound 11

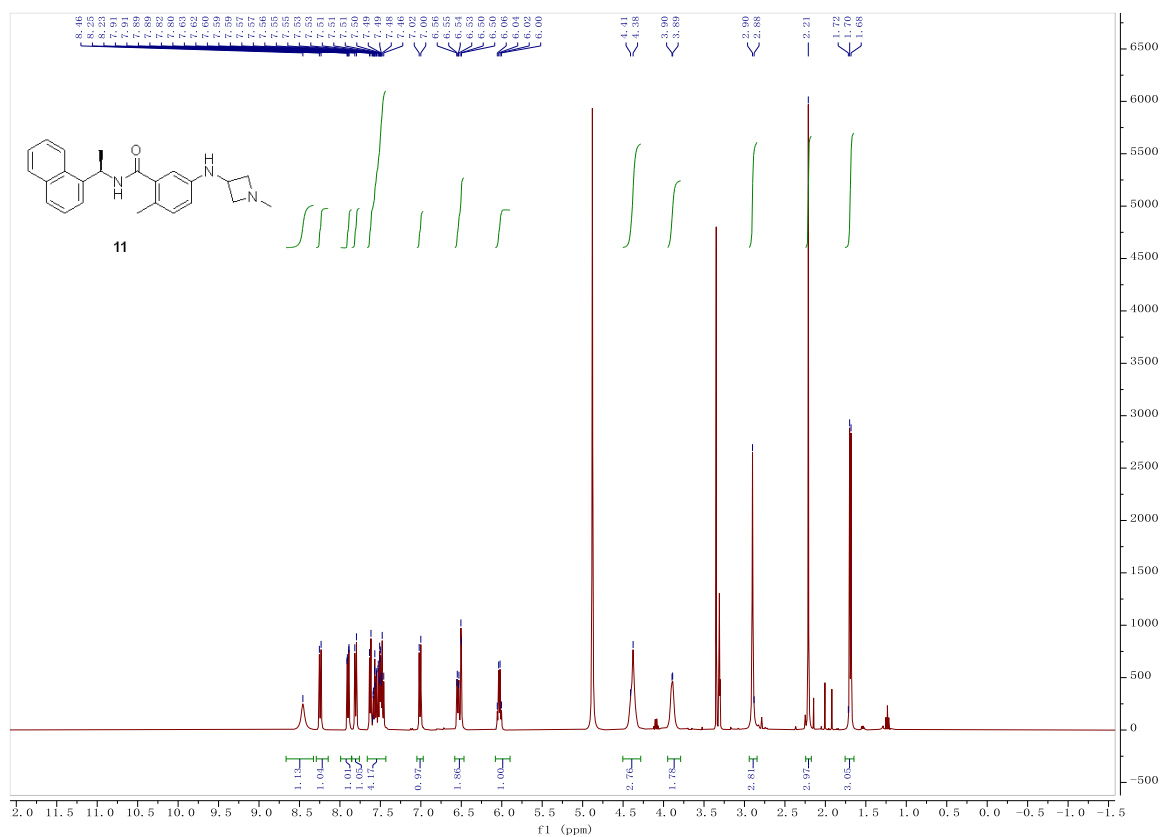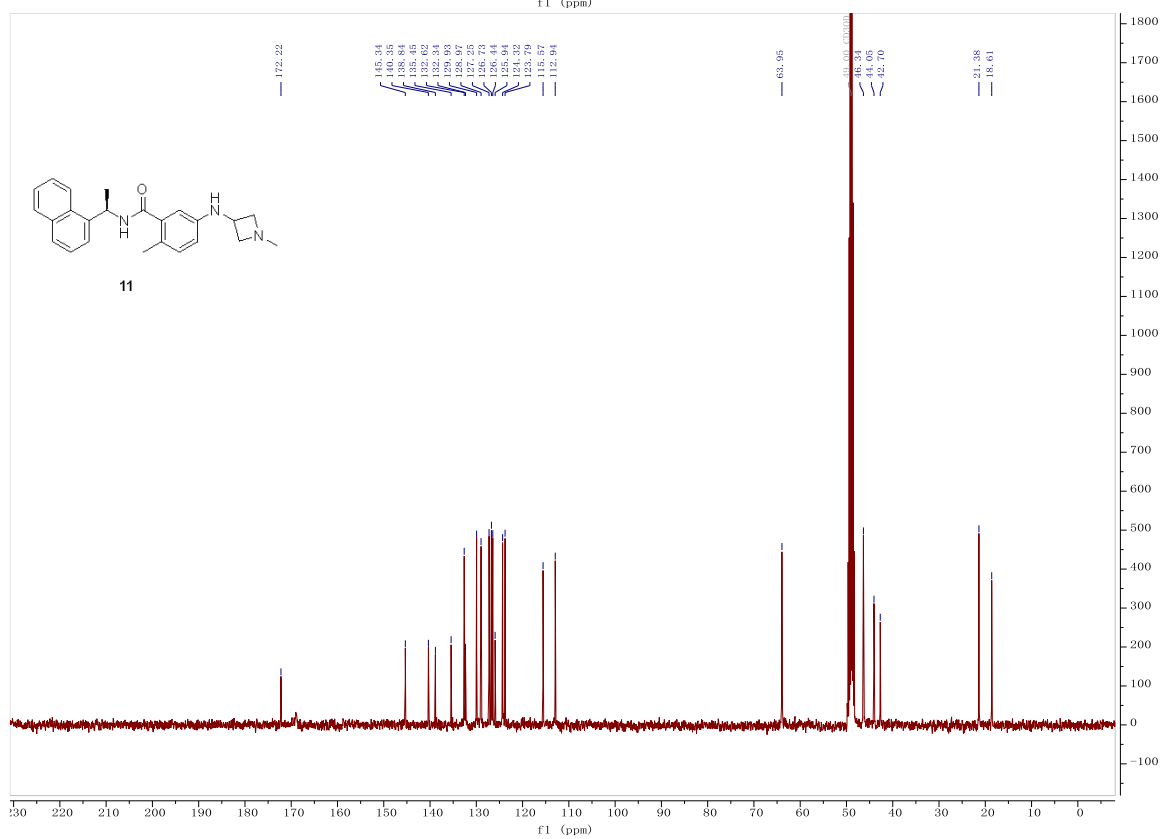

## Compound 12

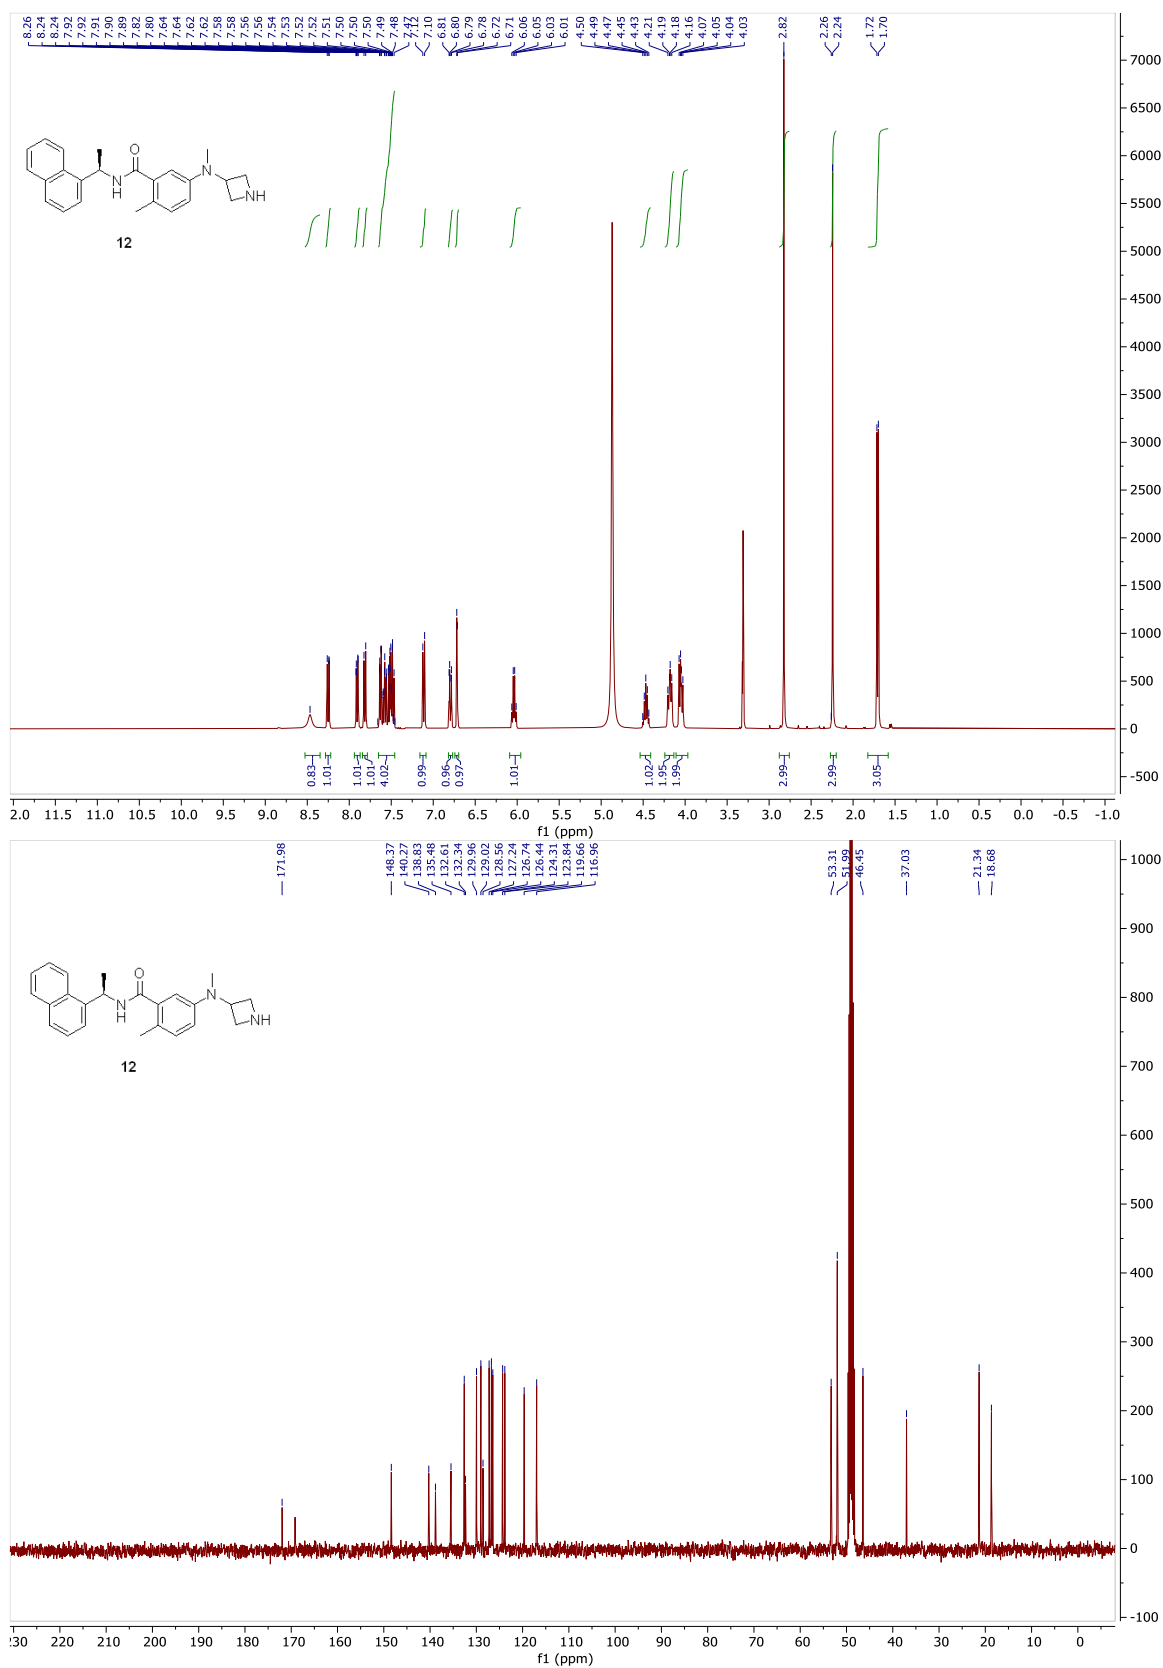

## Compound 14

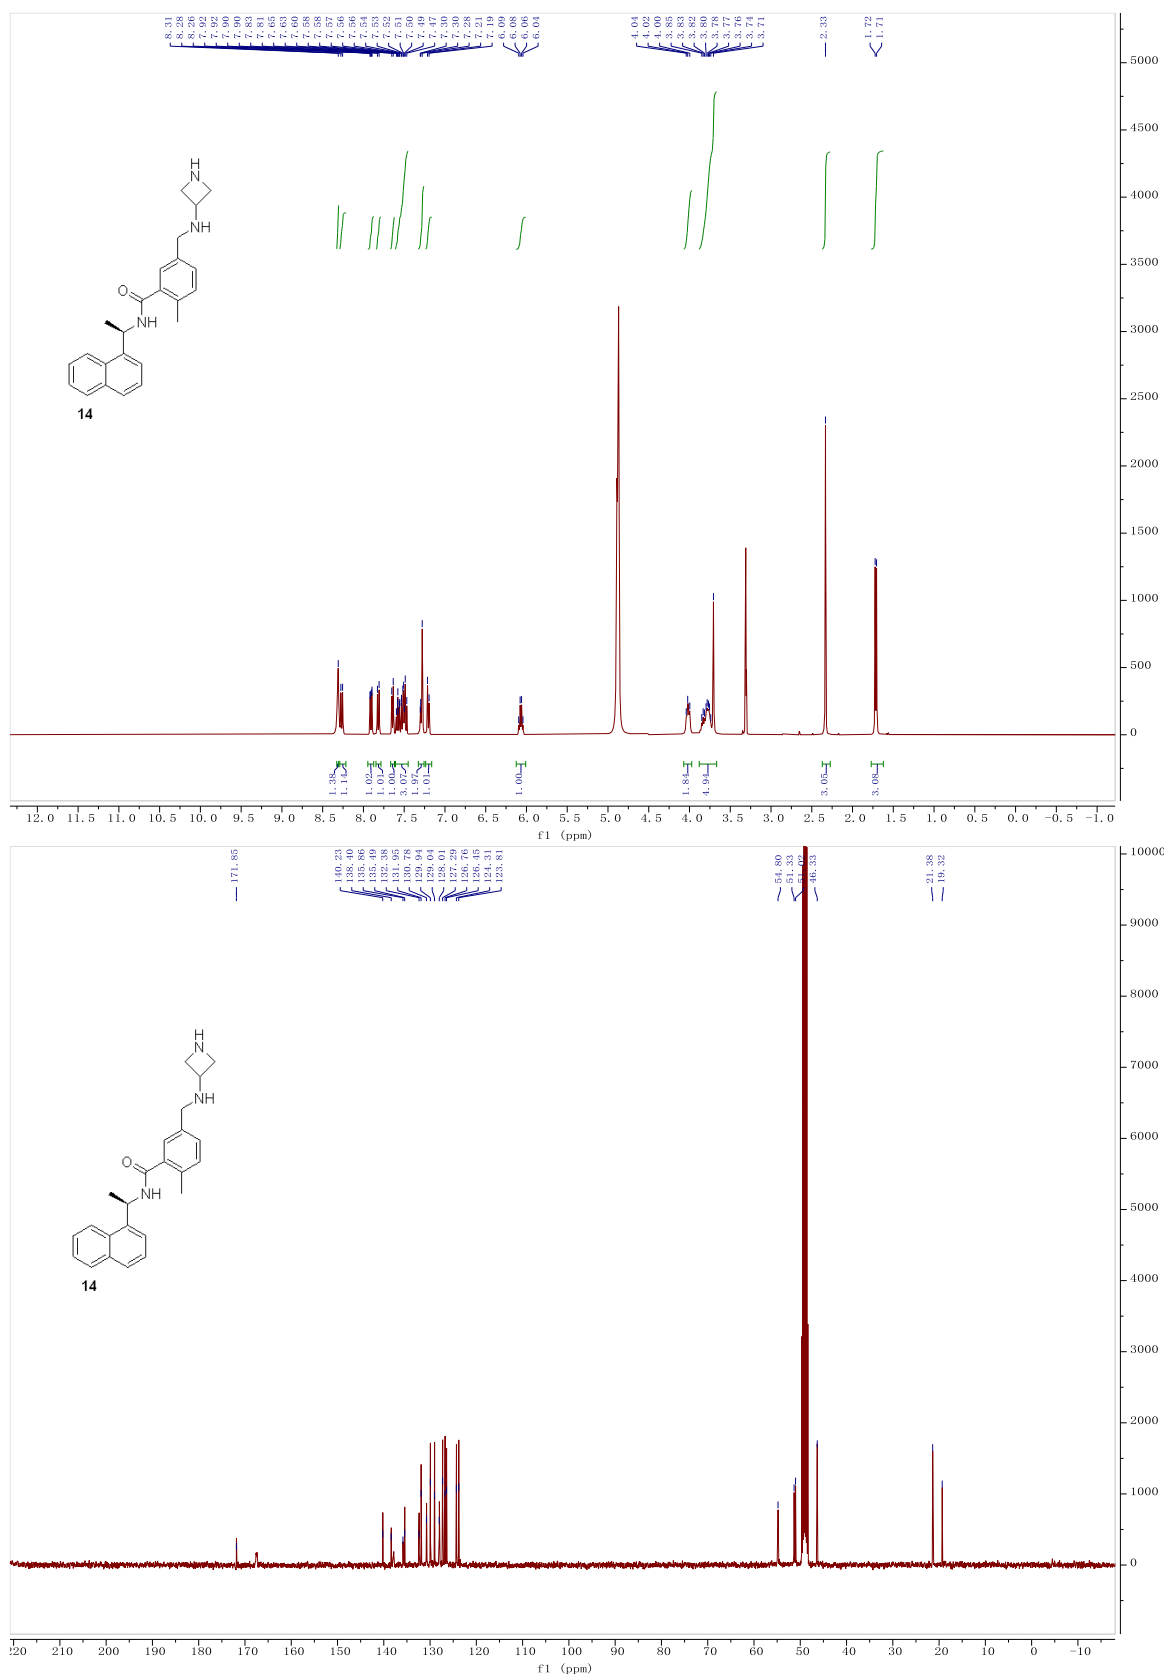

## Compound 15

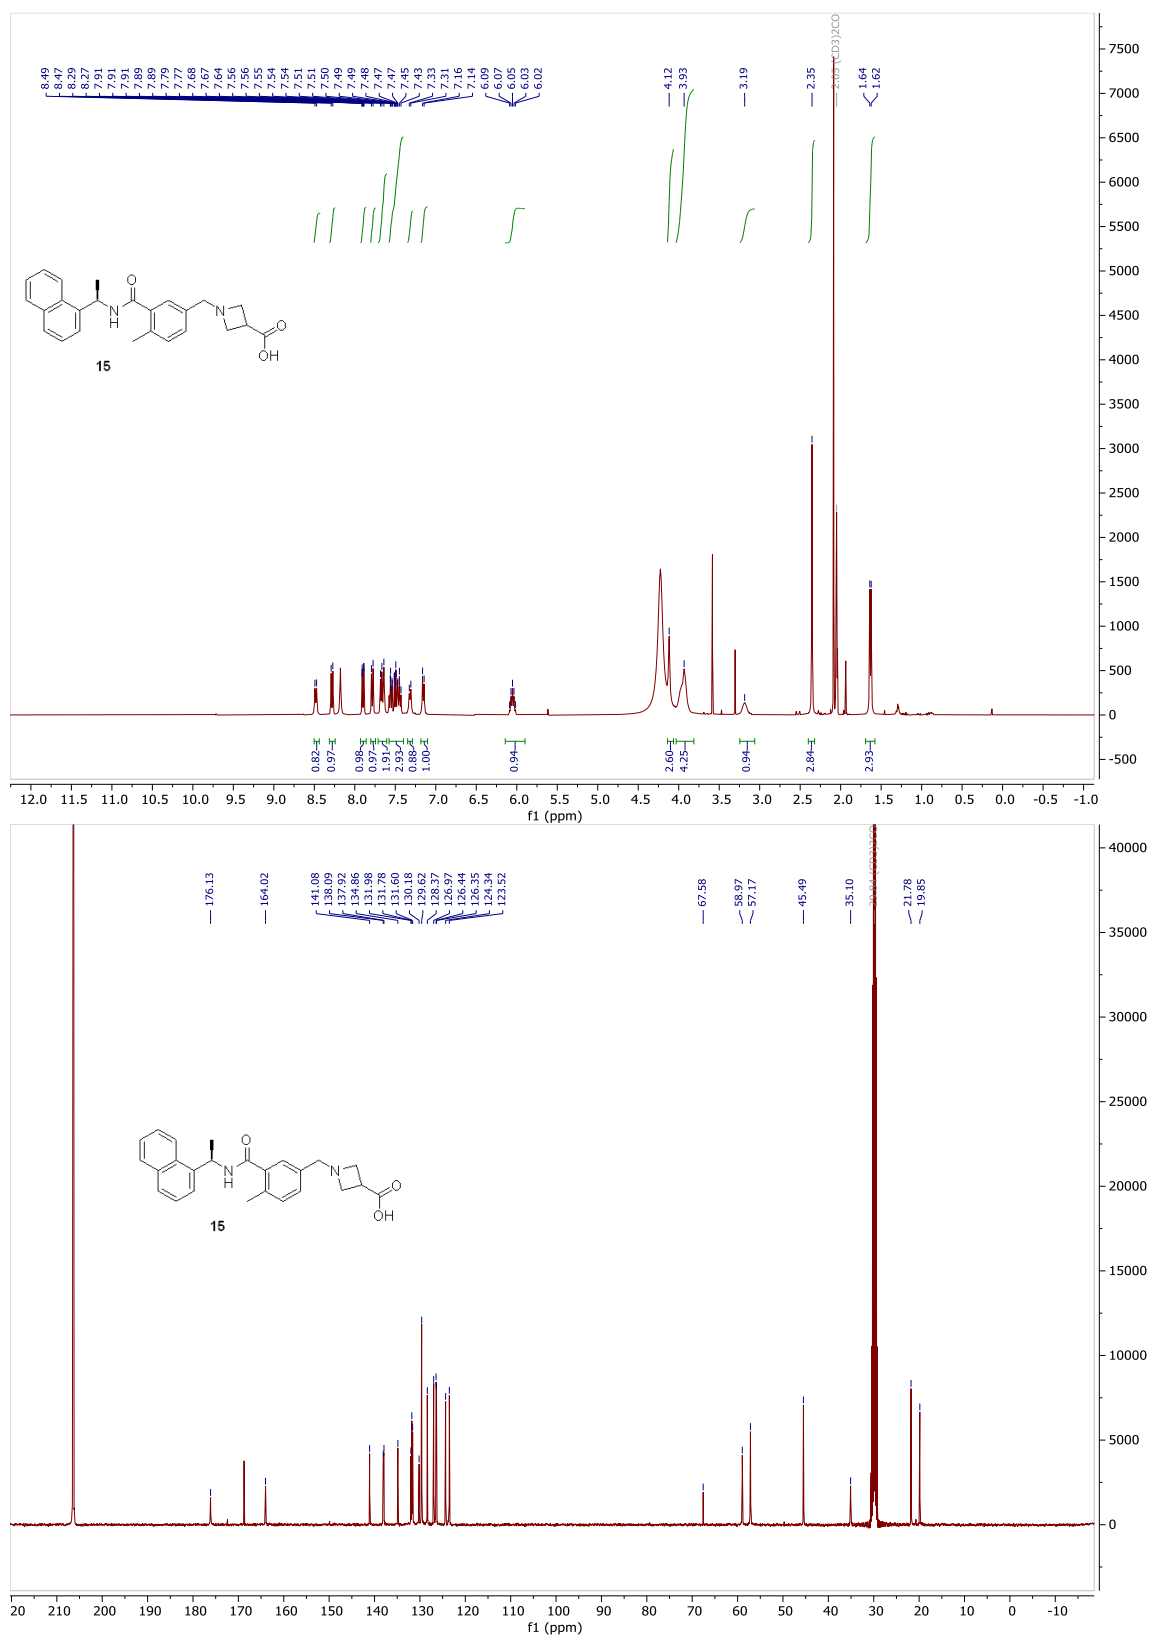



## Compound 16

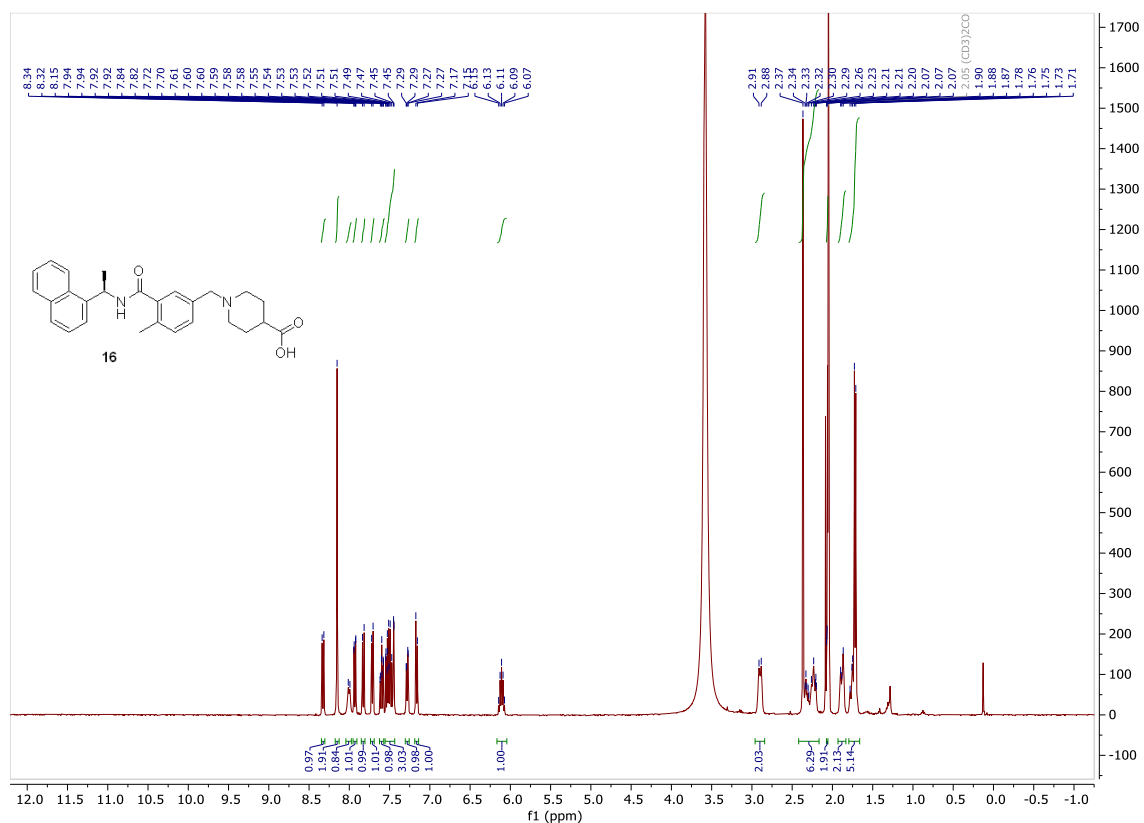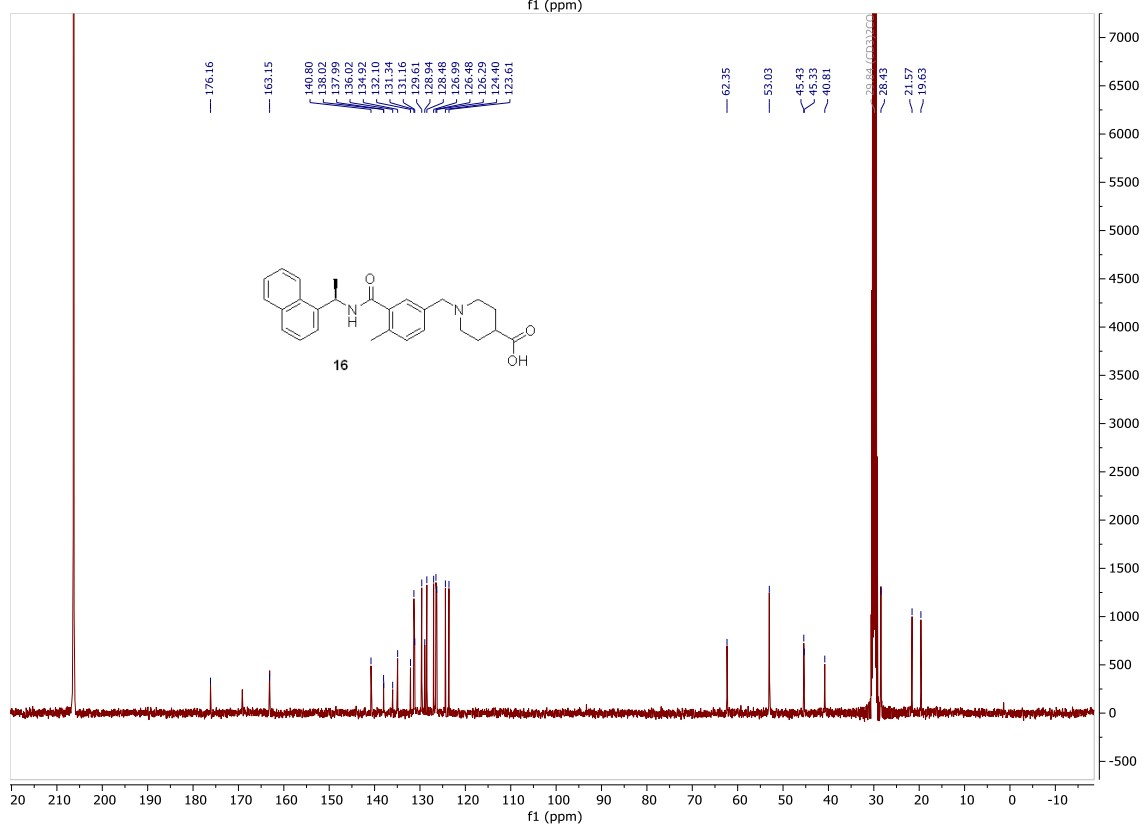

## Compound 17

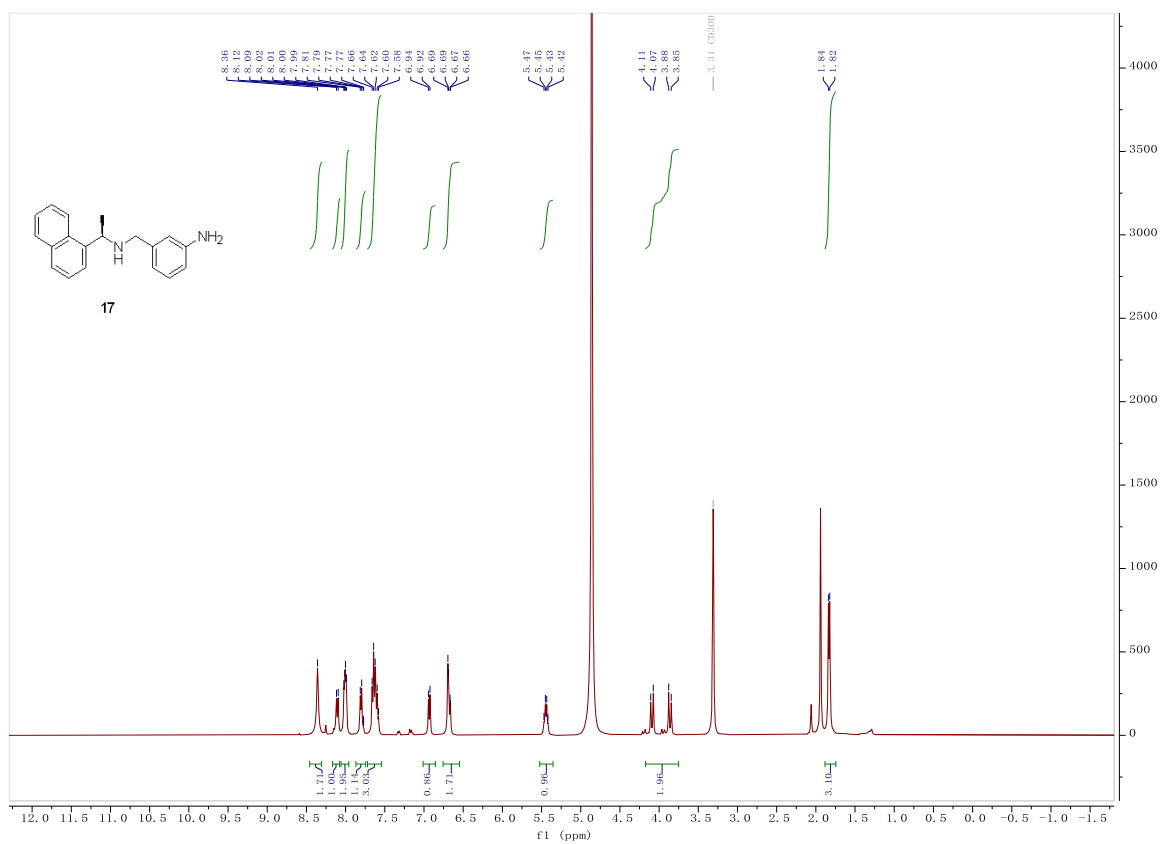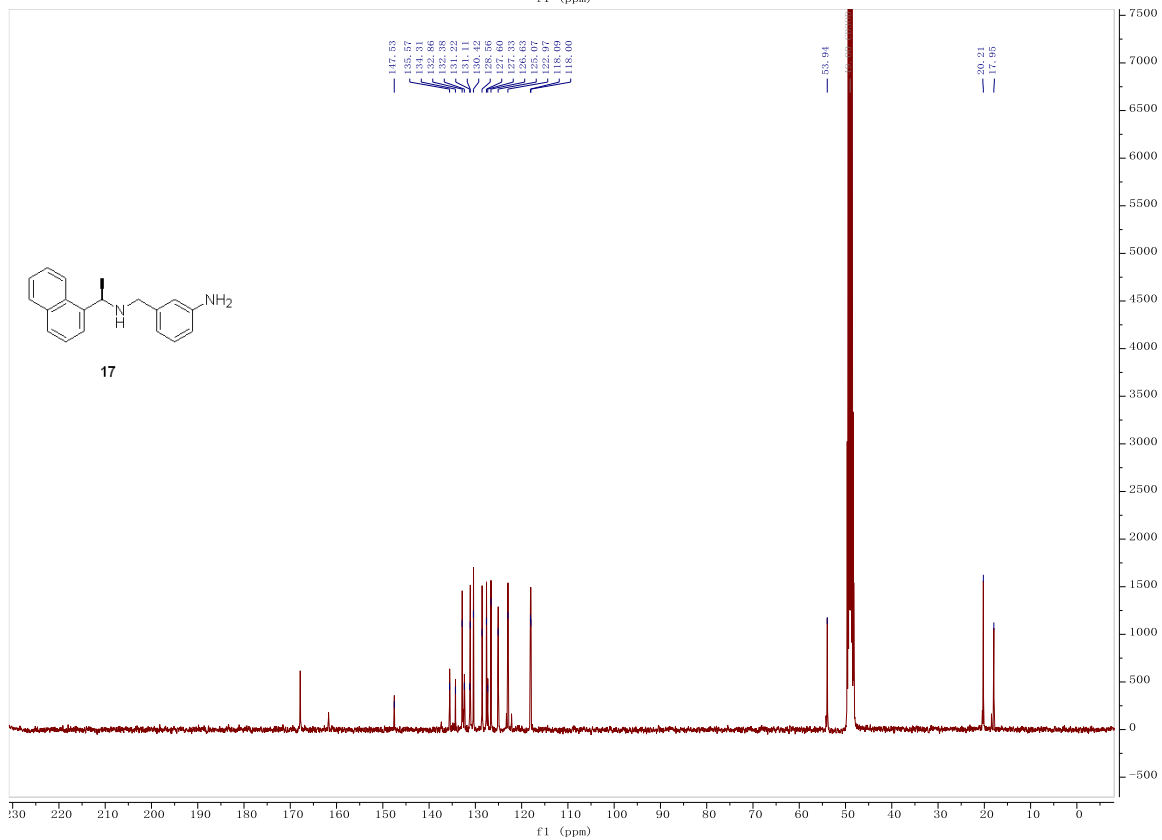

## Compound 20

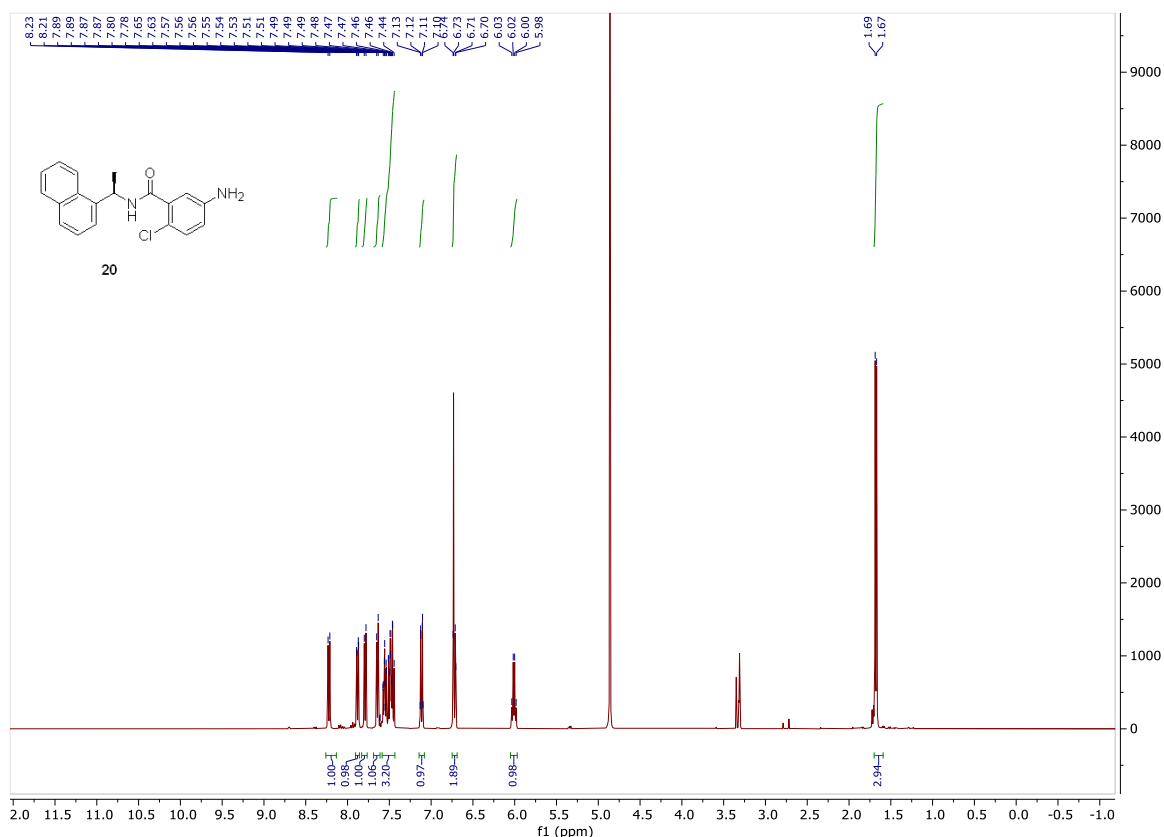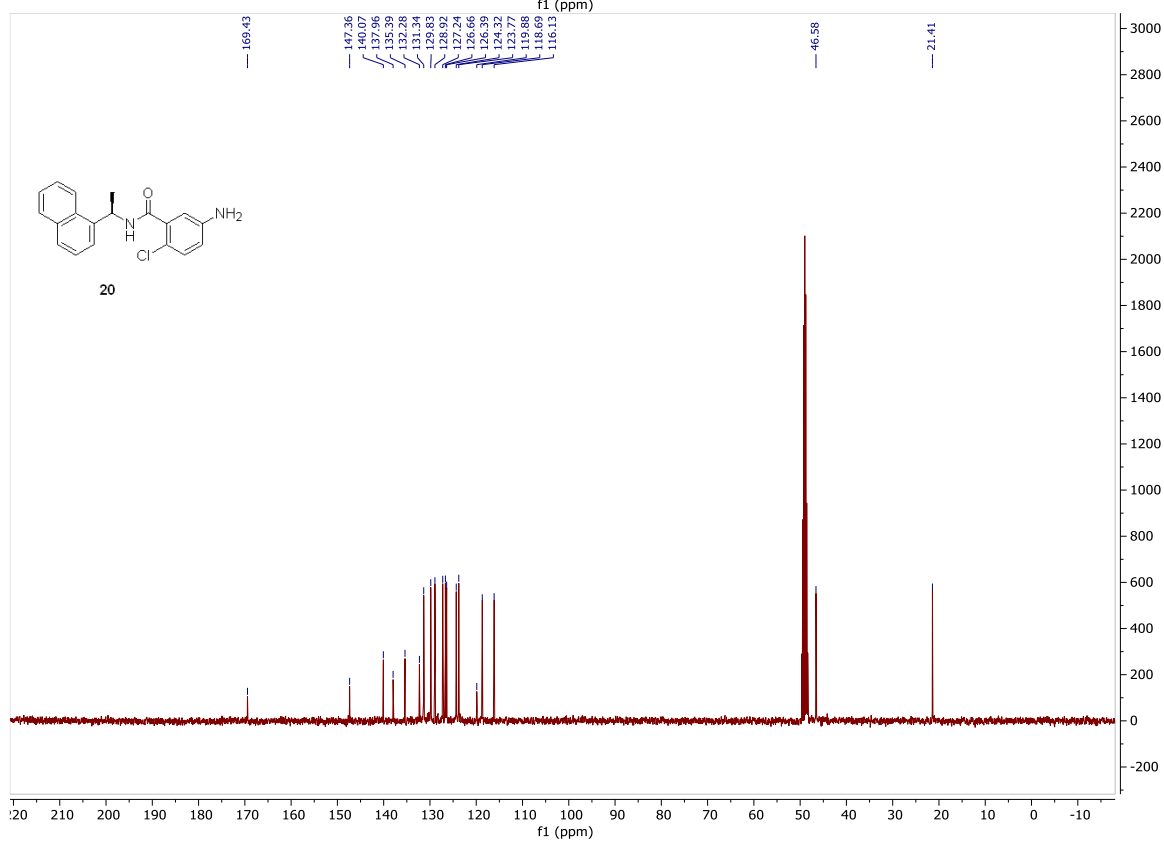

## Compound 21

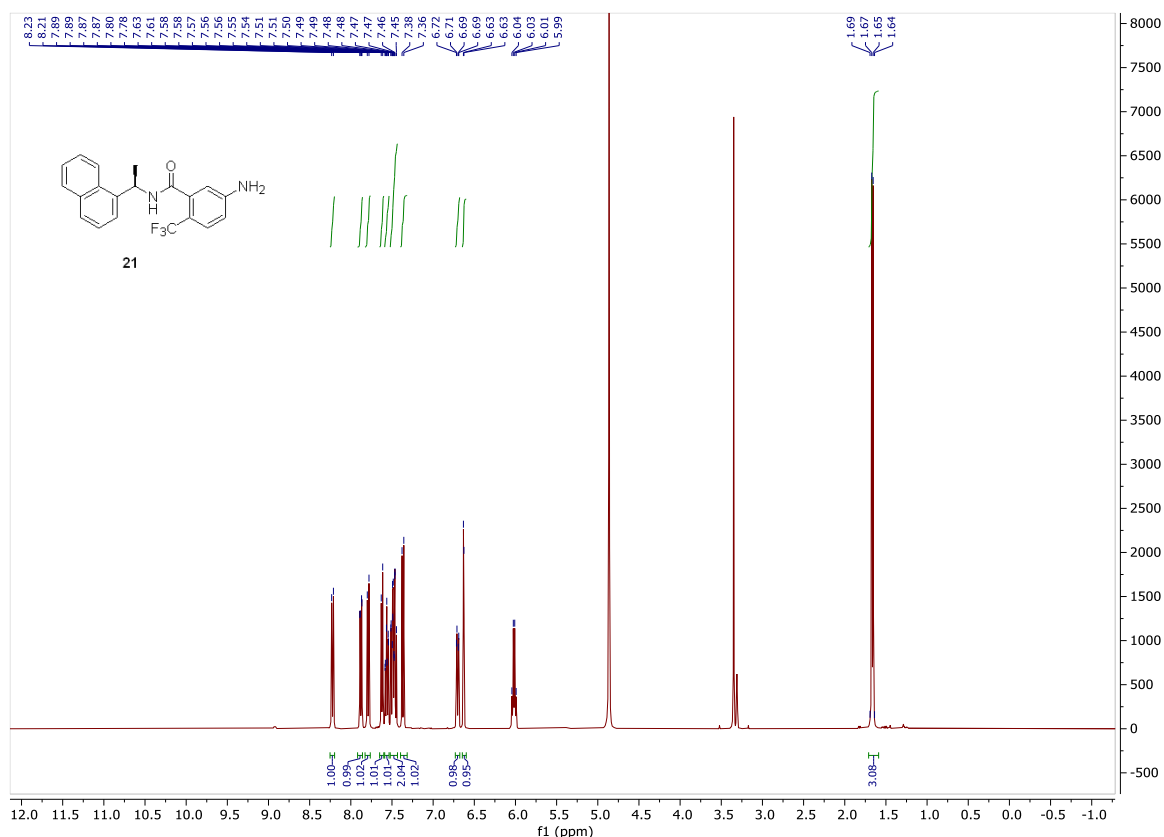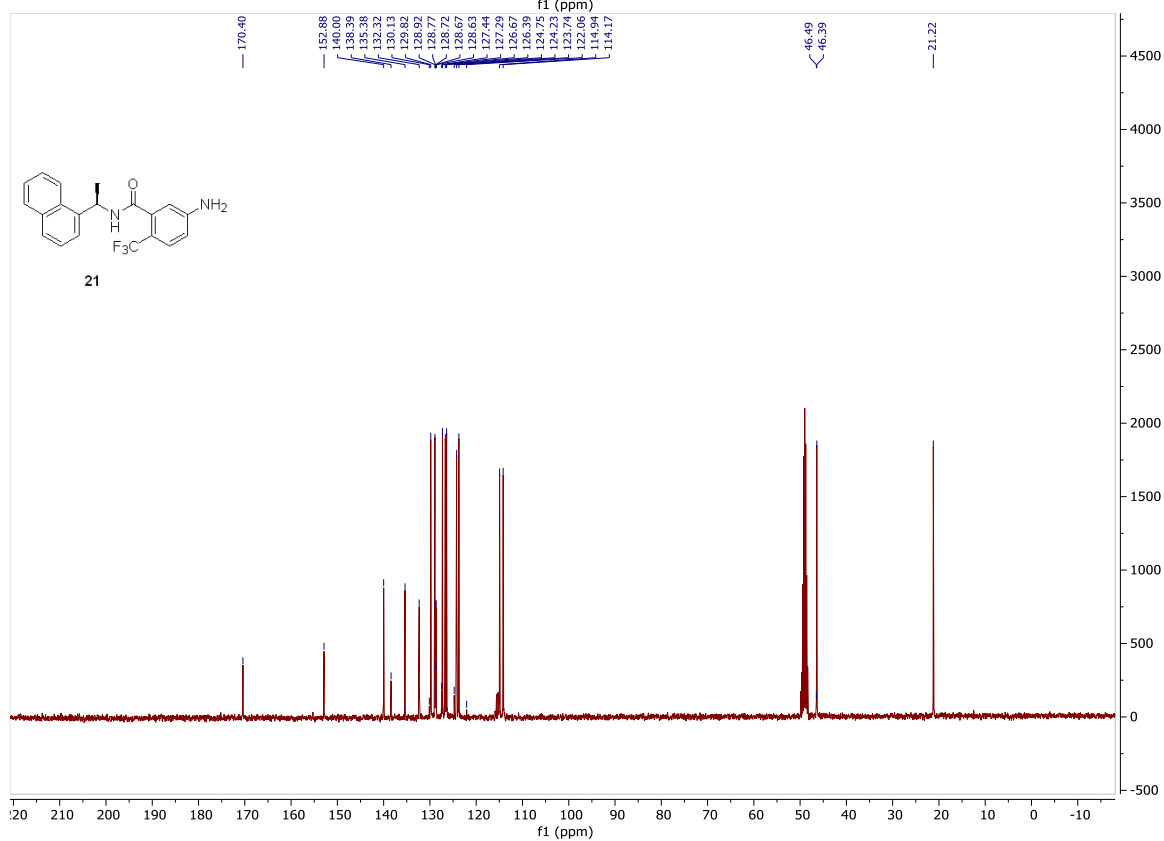

## Compound 22

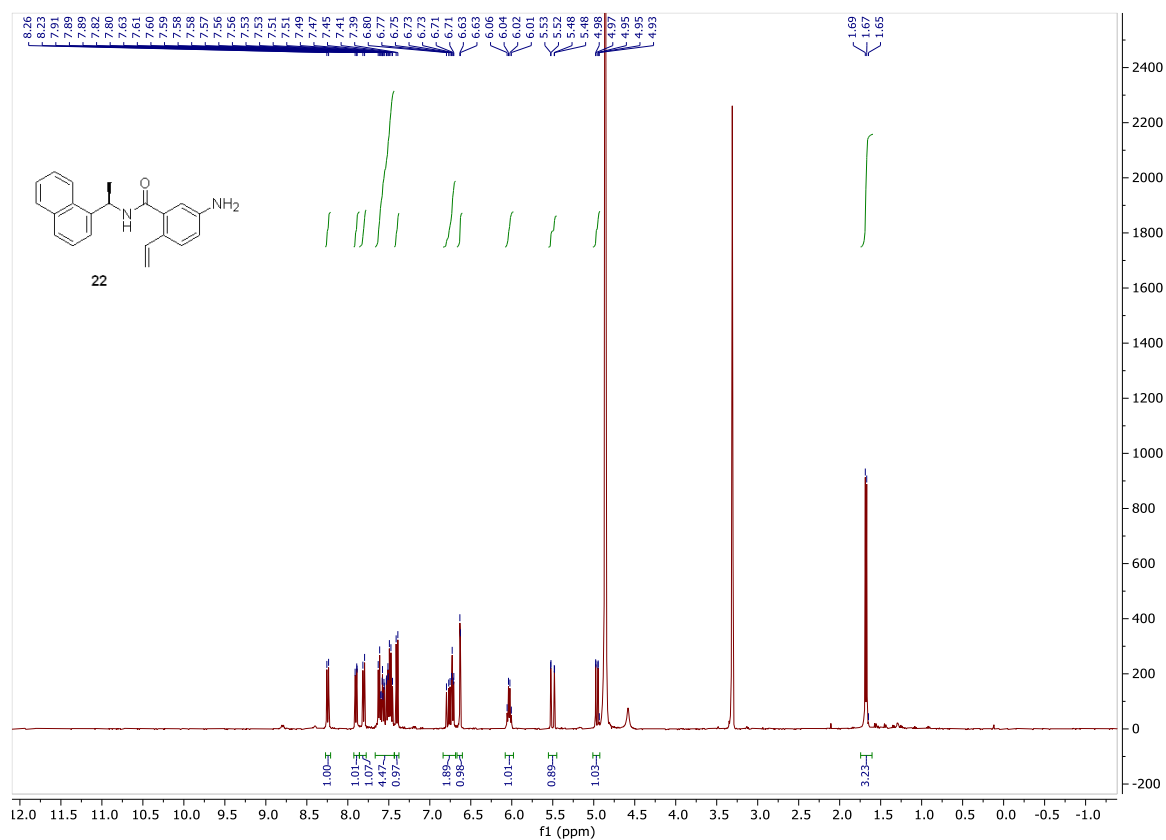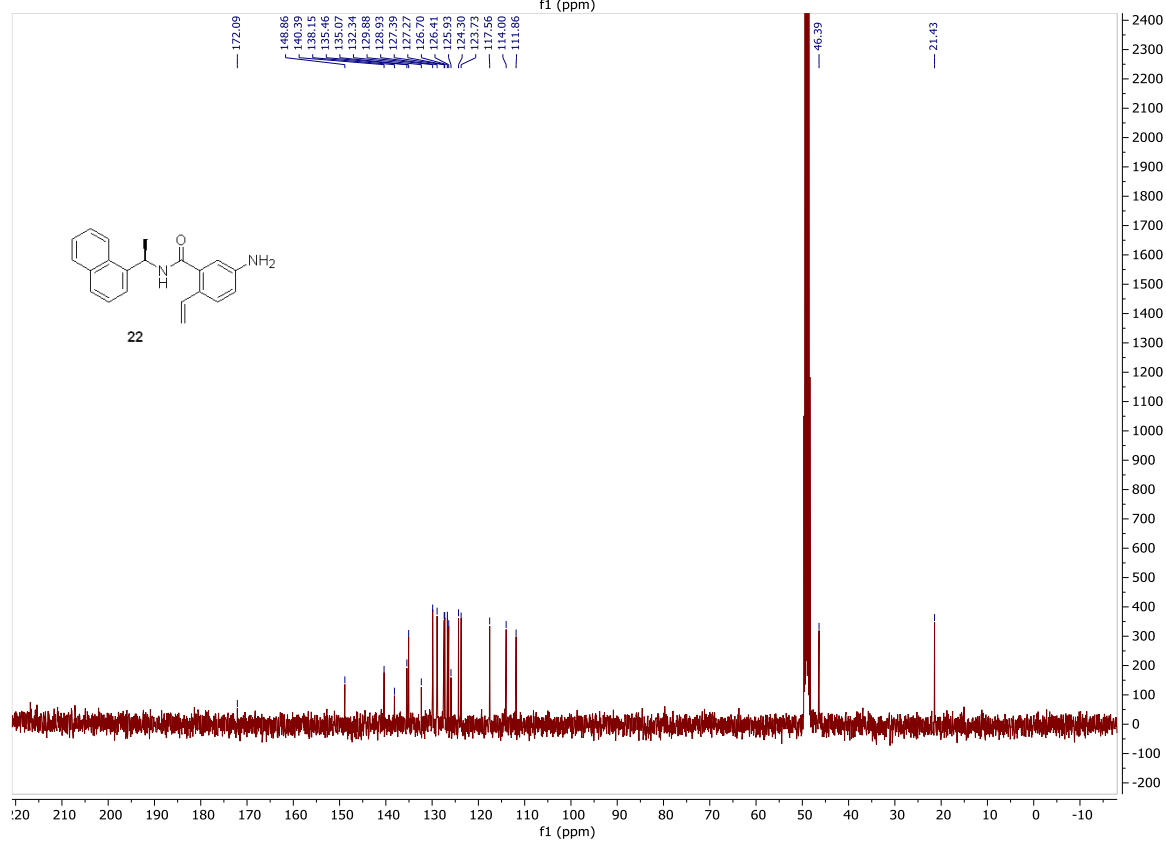

## Compound 24

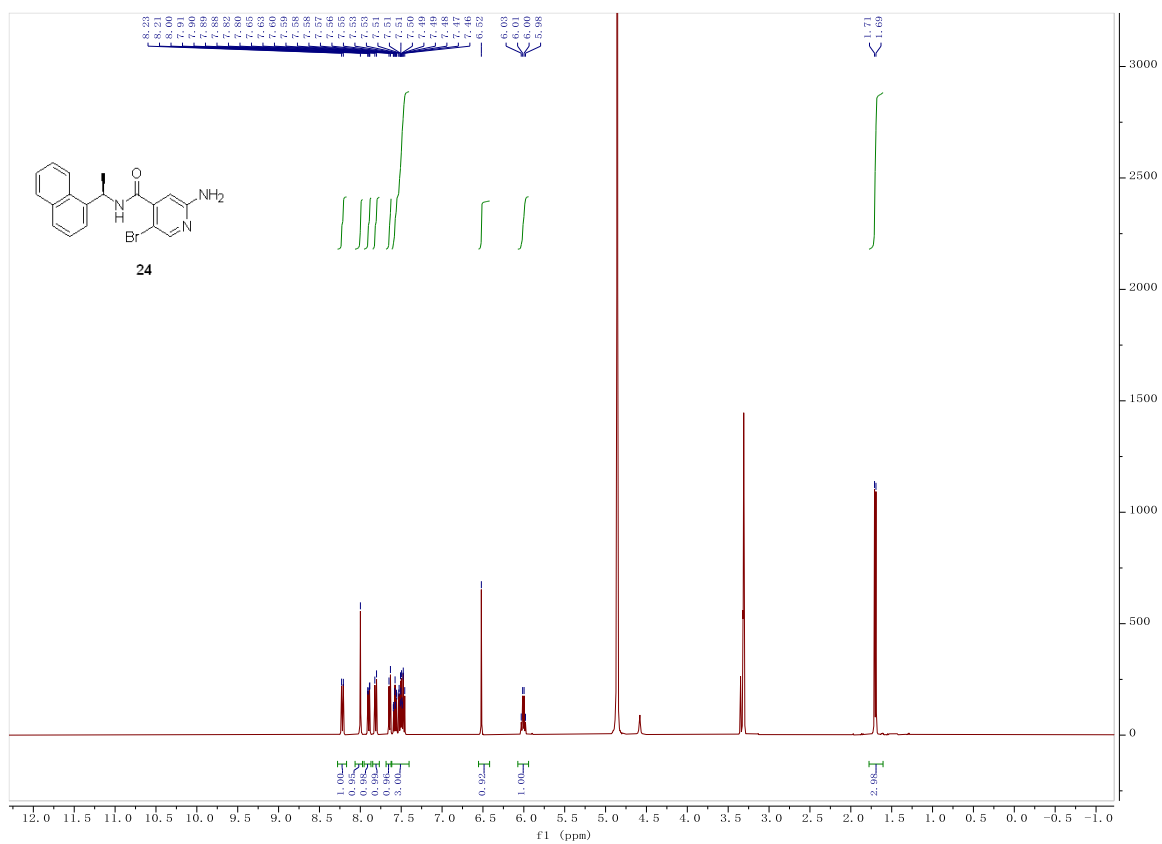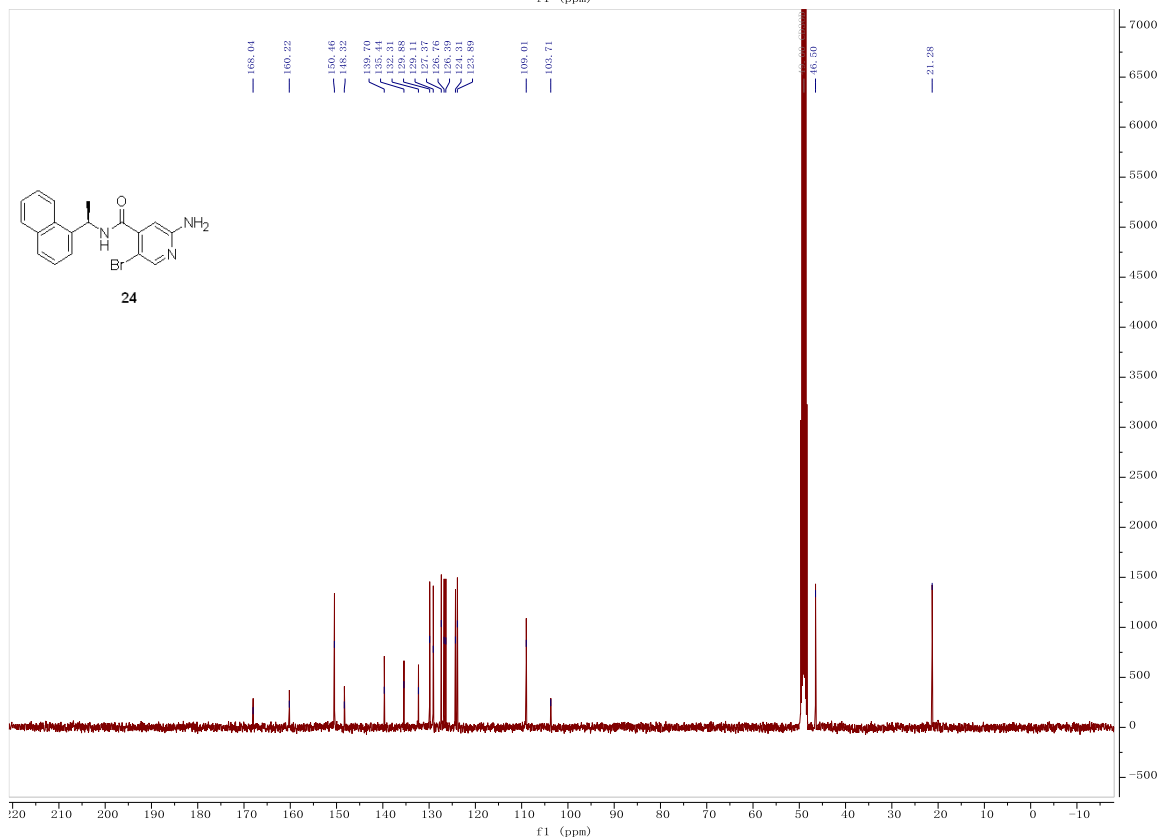

## Compound 30

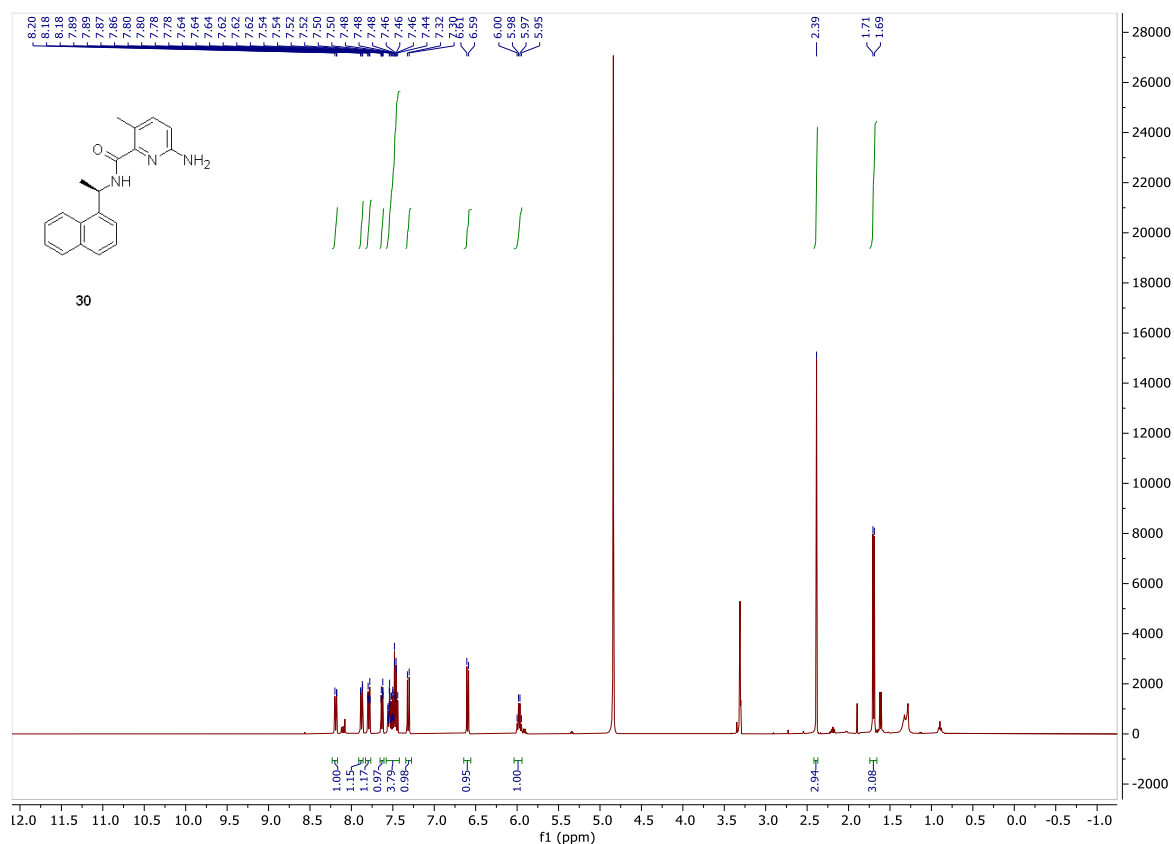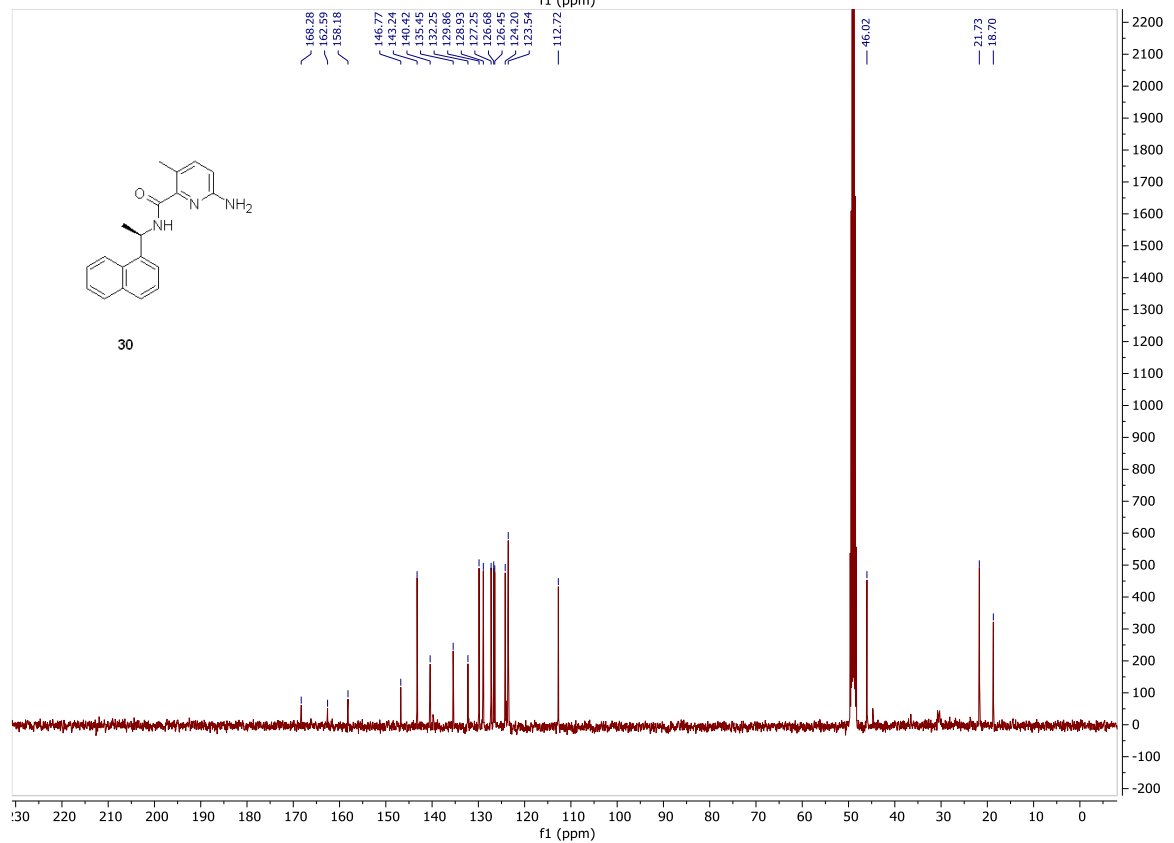

## Compound 31

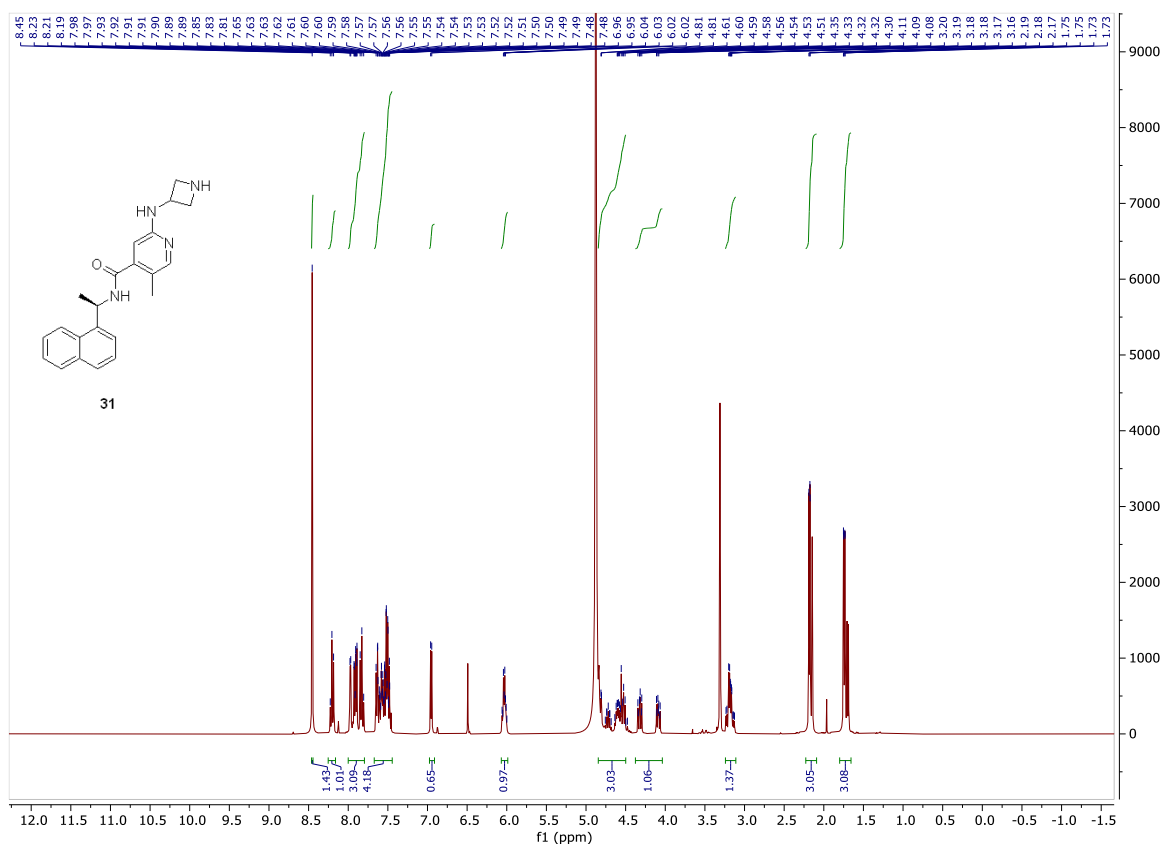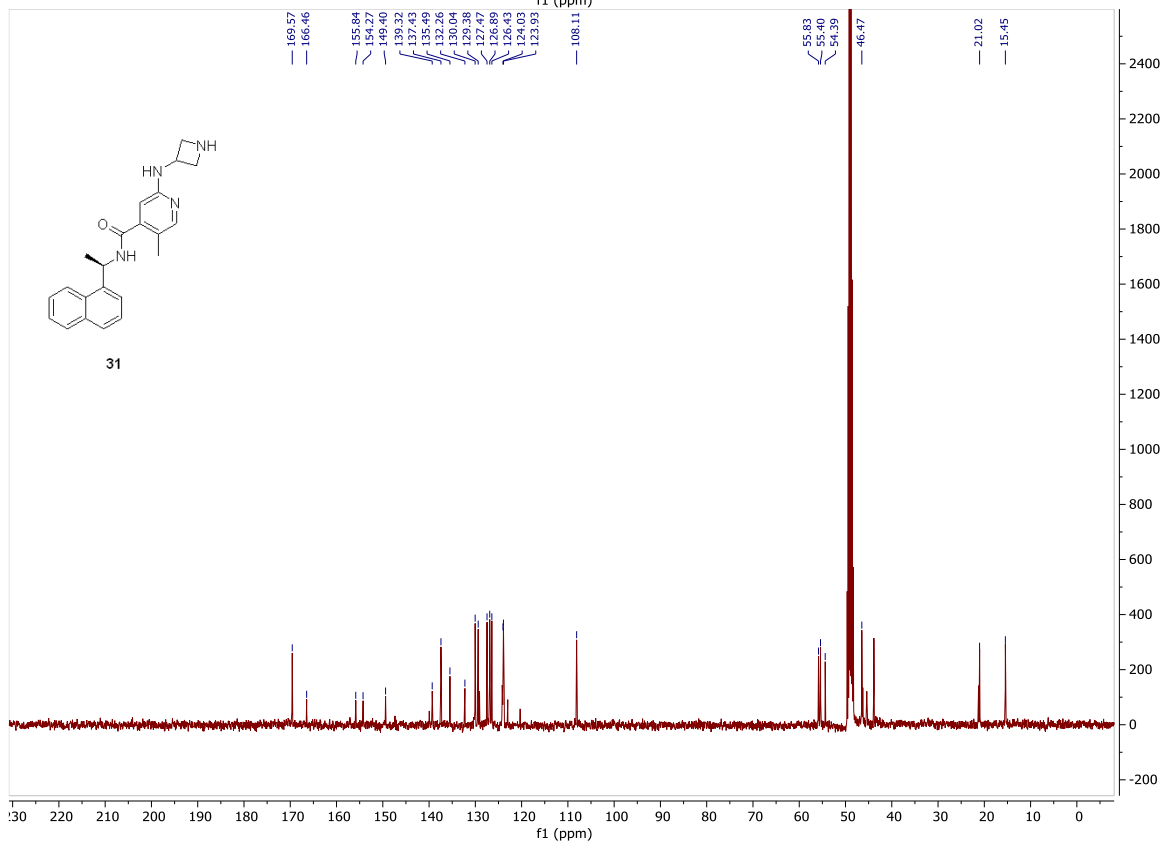



## Compound 33

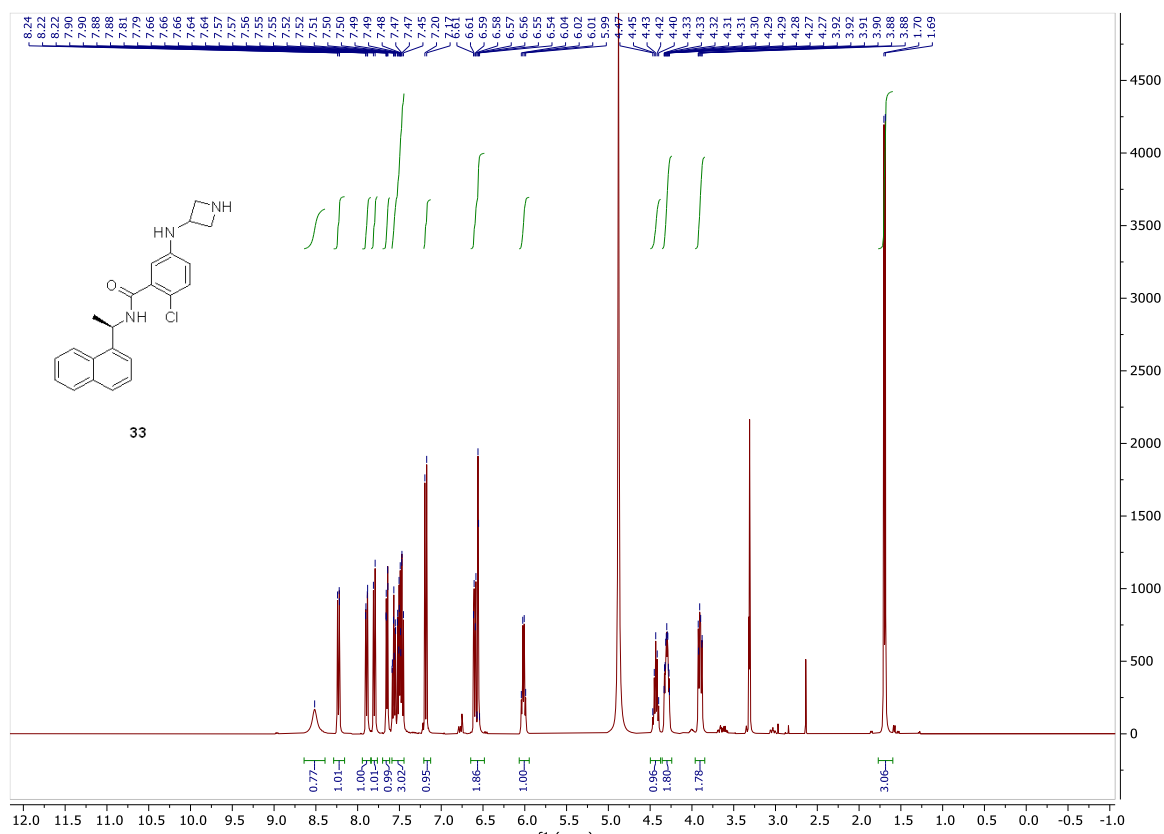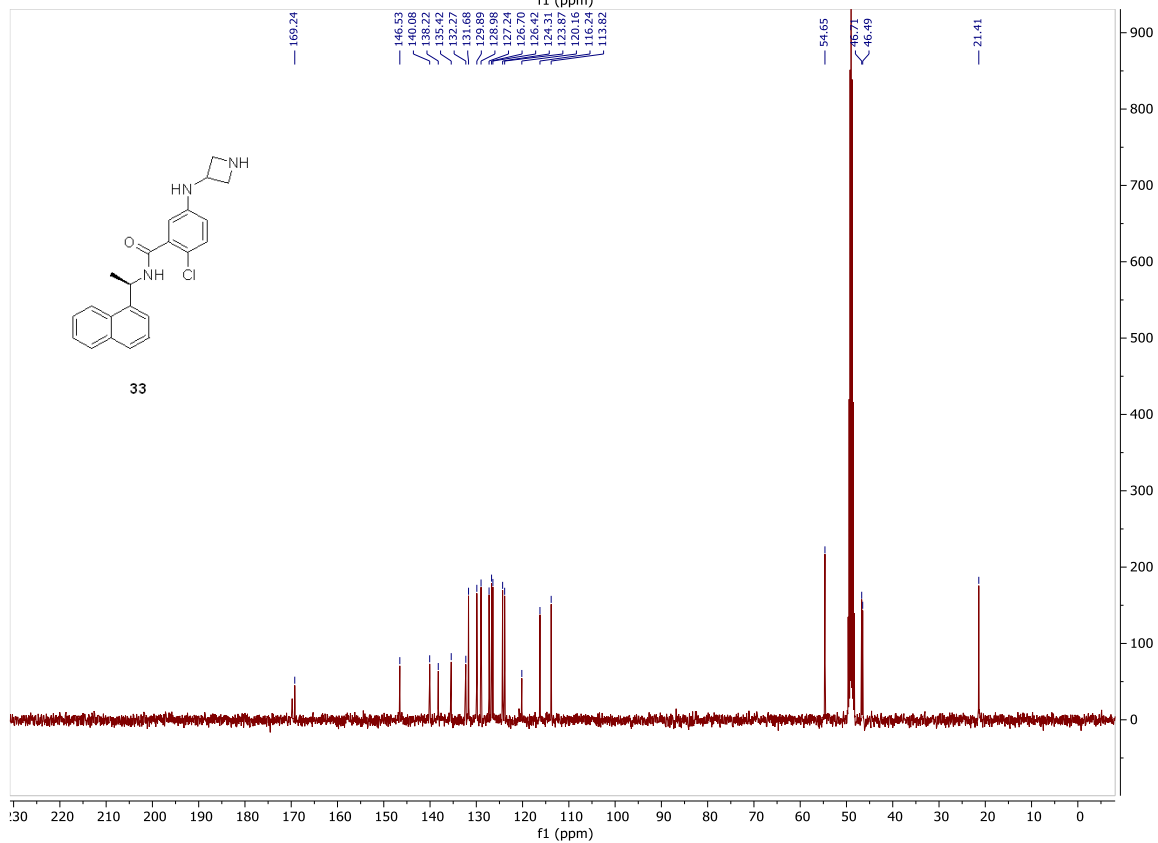

## Compound 34

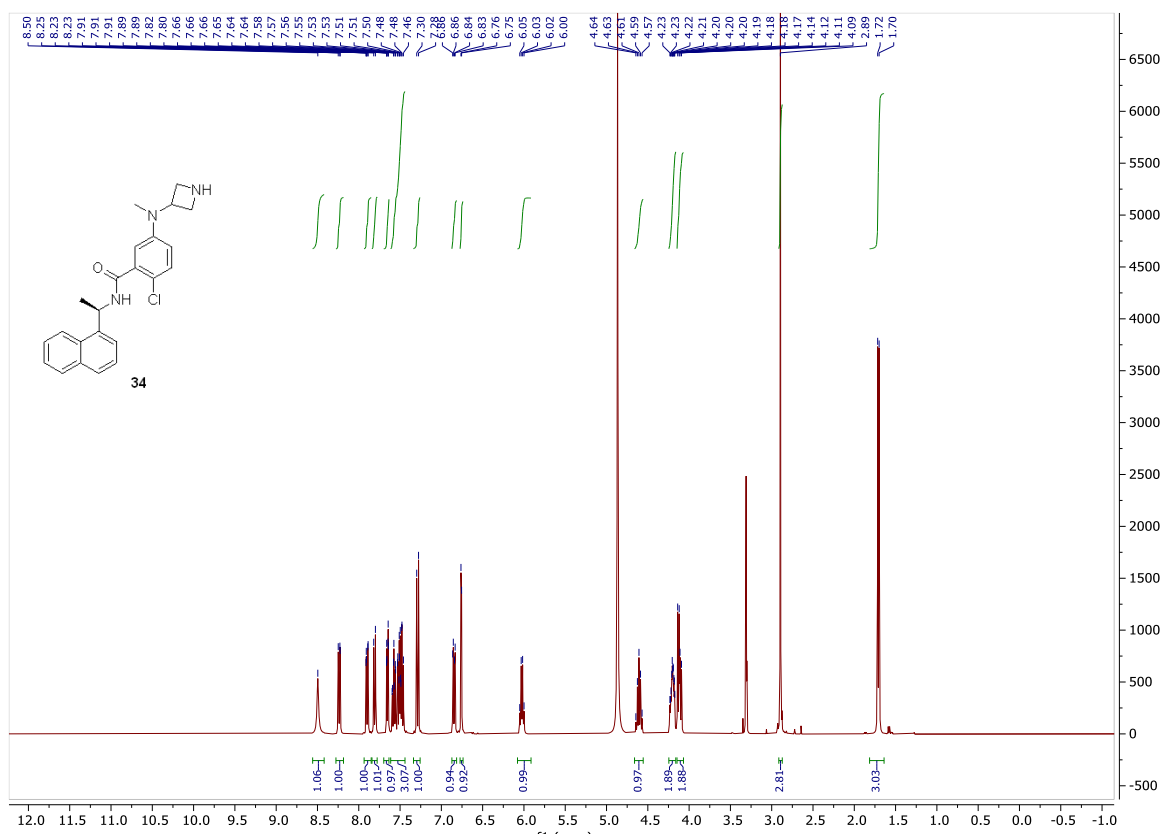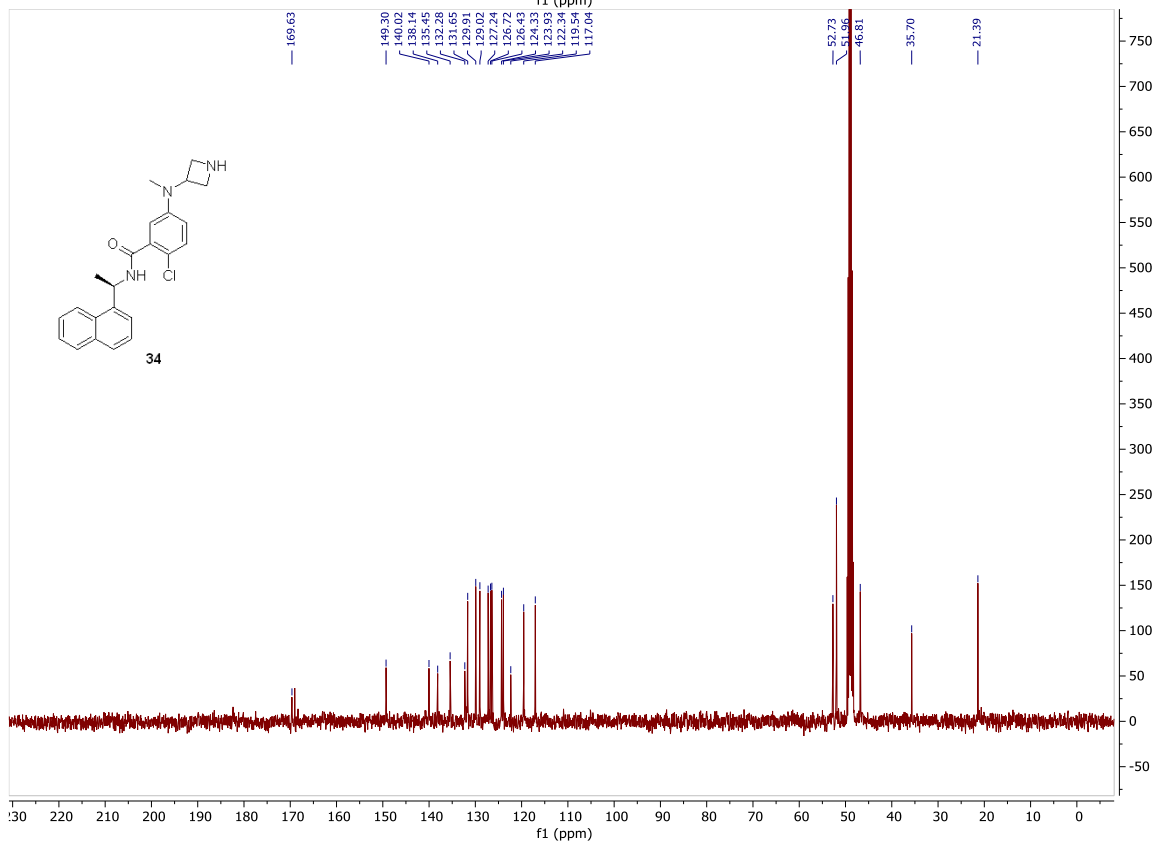

## Compound 35

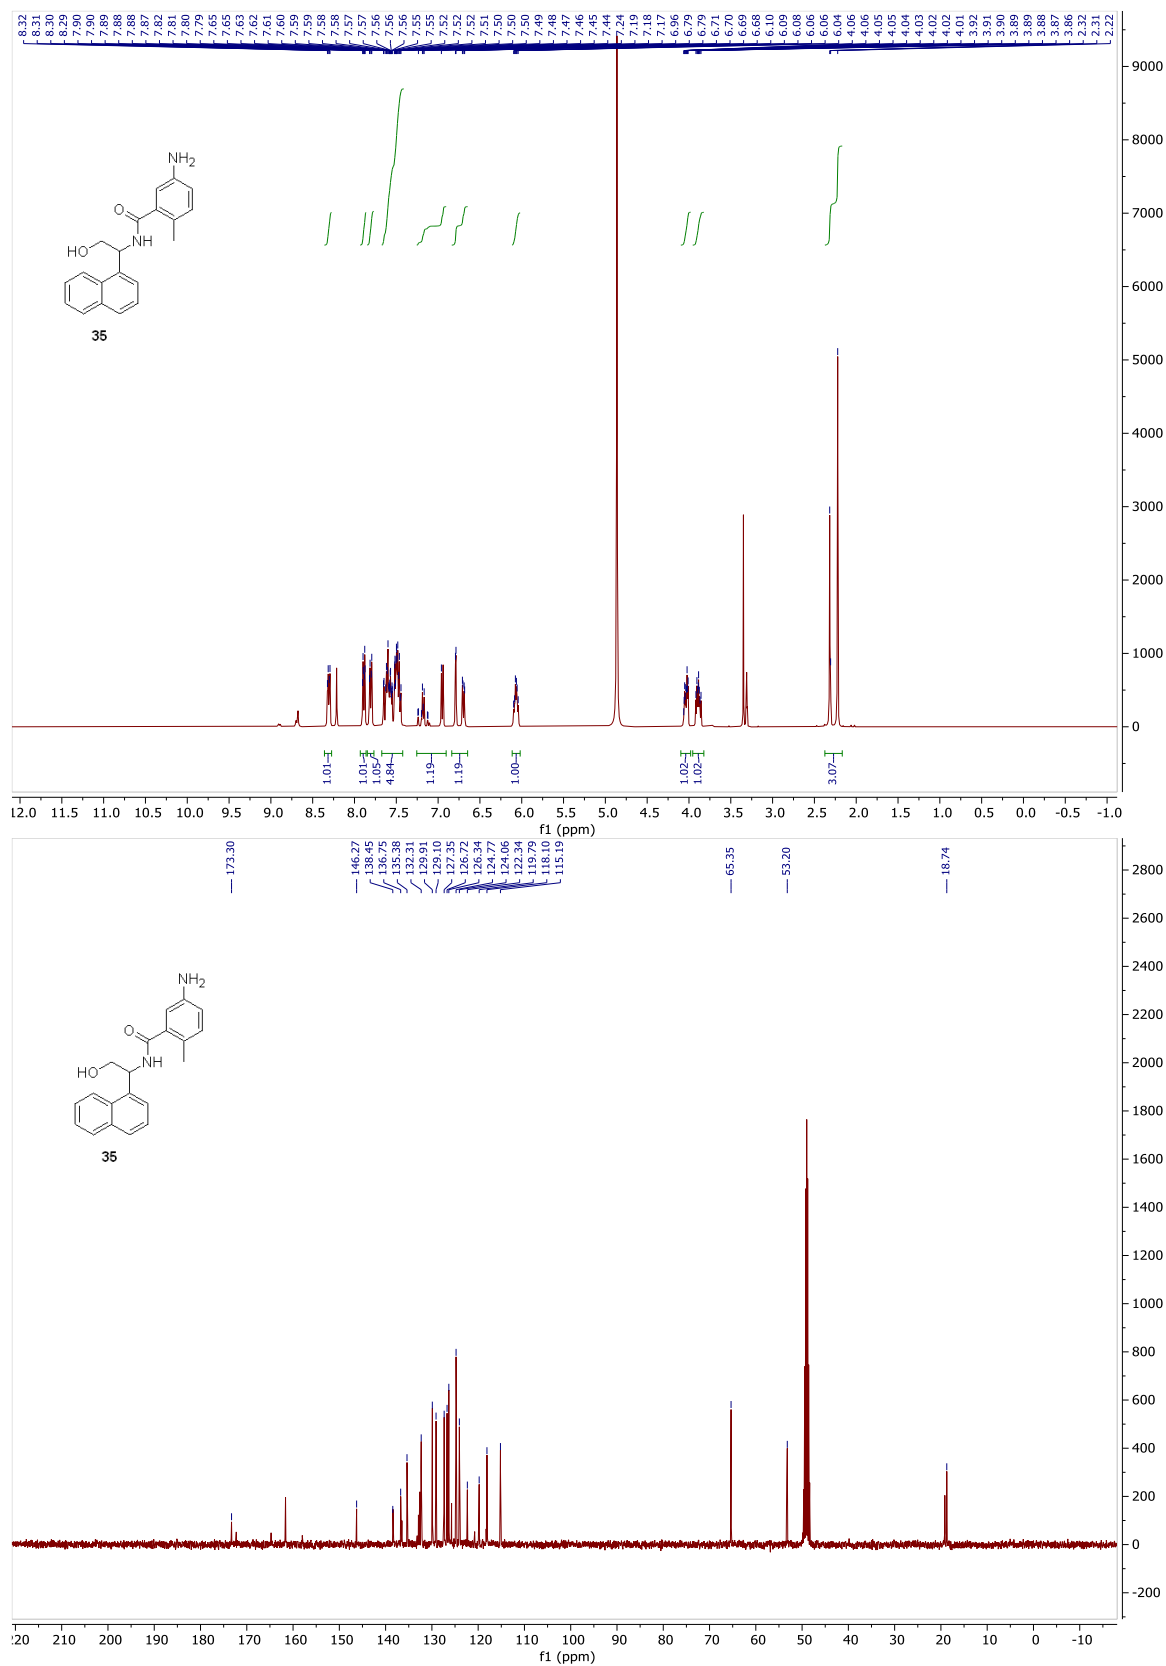

## Compound 36

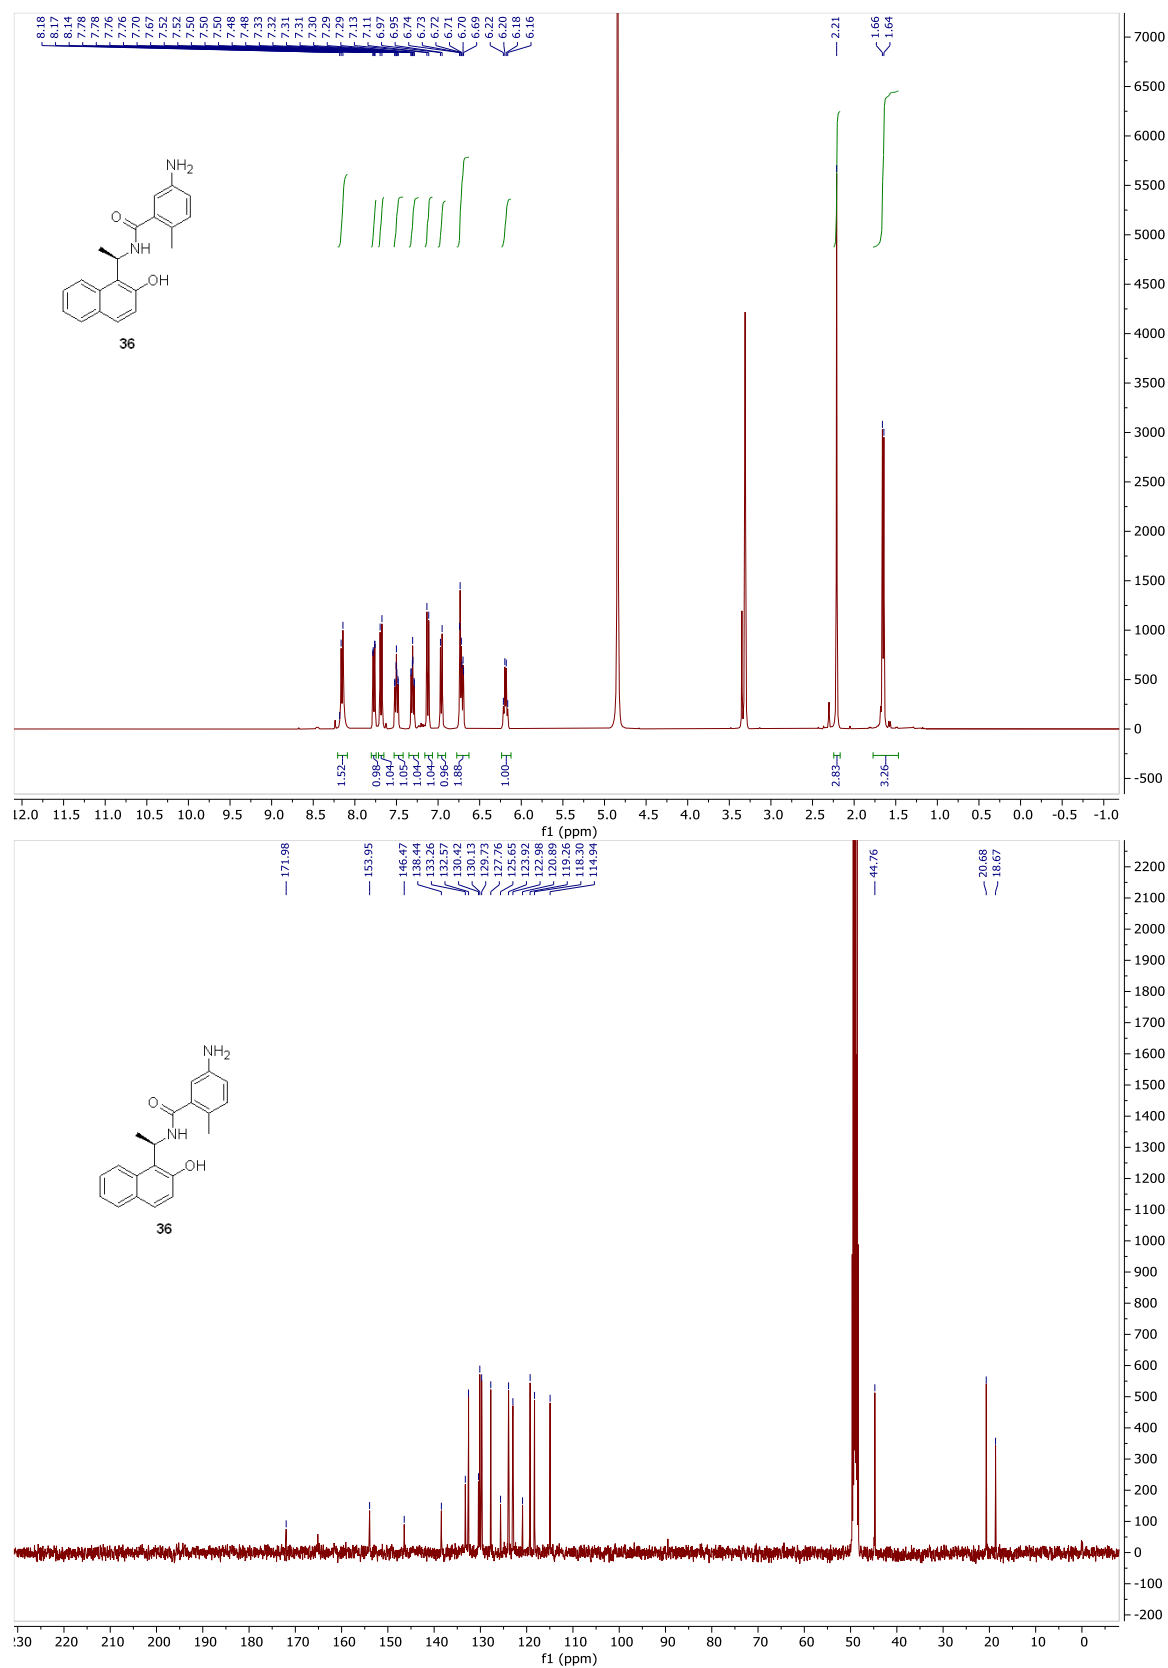



## Compound 38

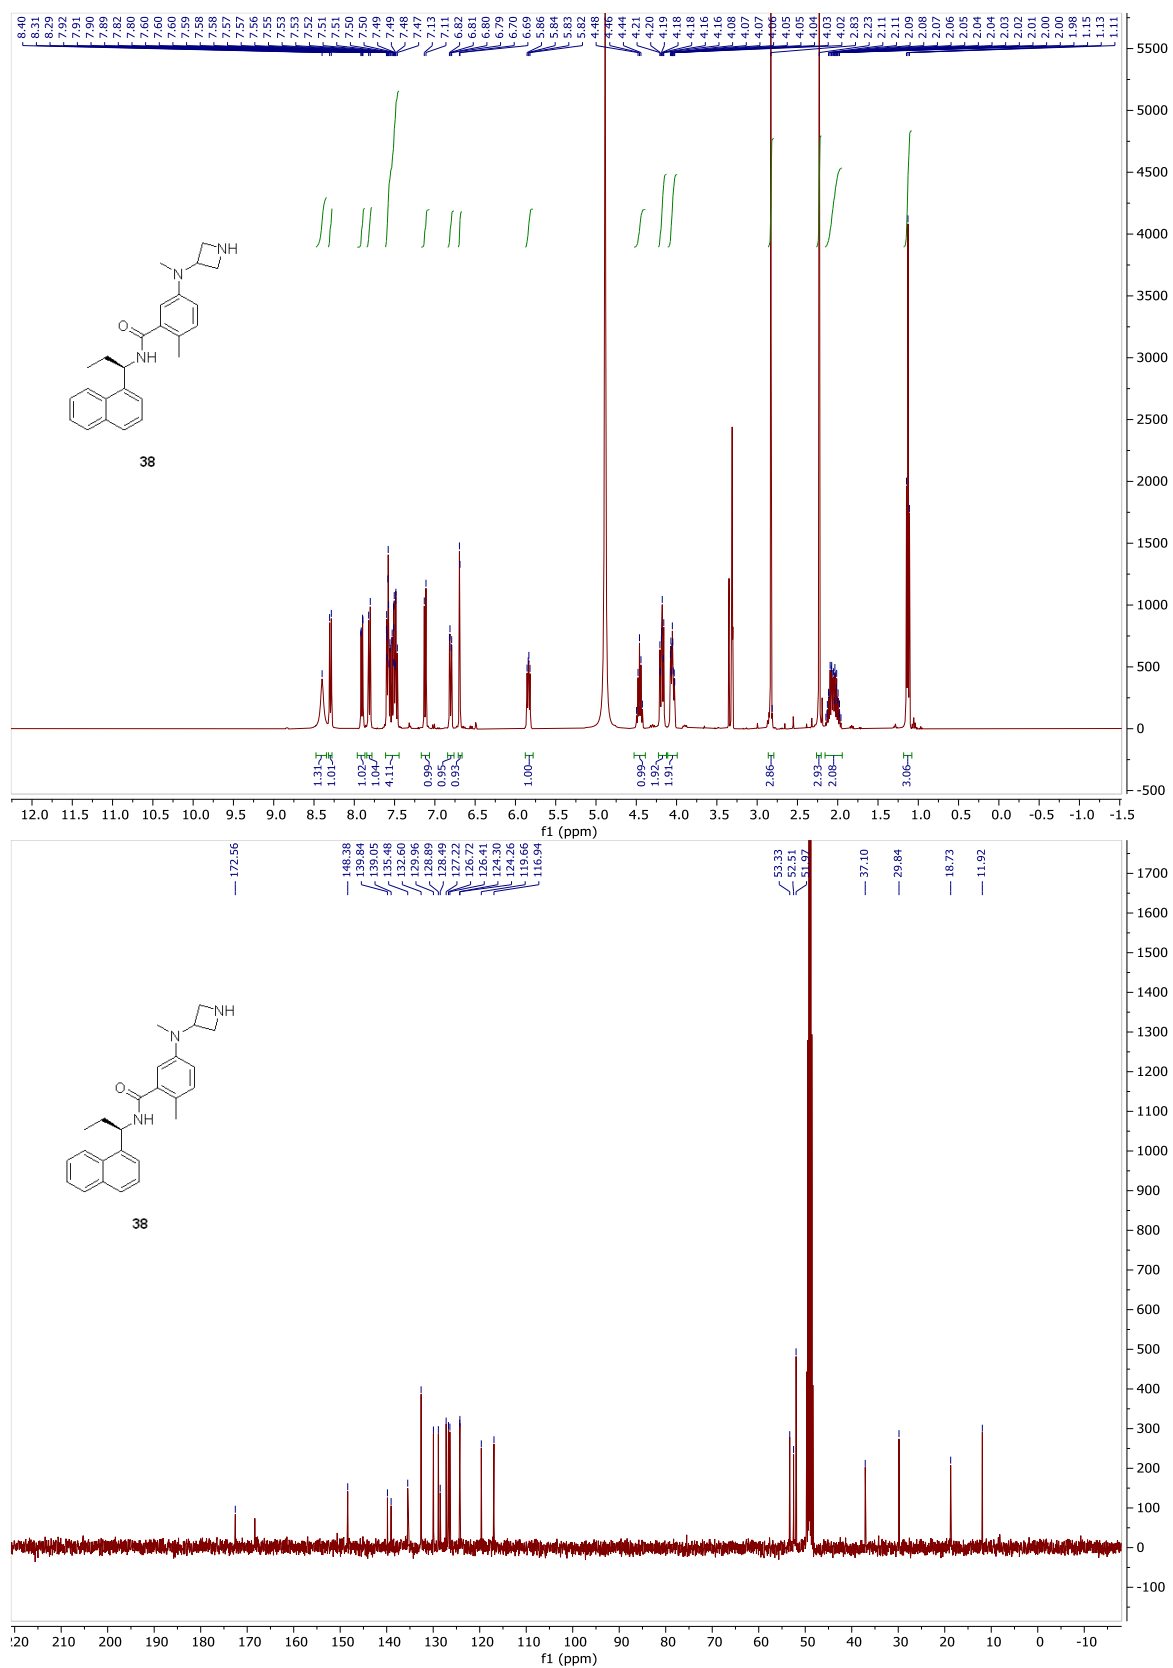

## Compound 39

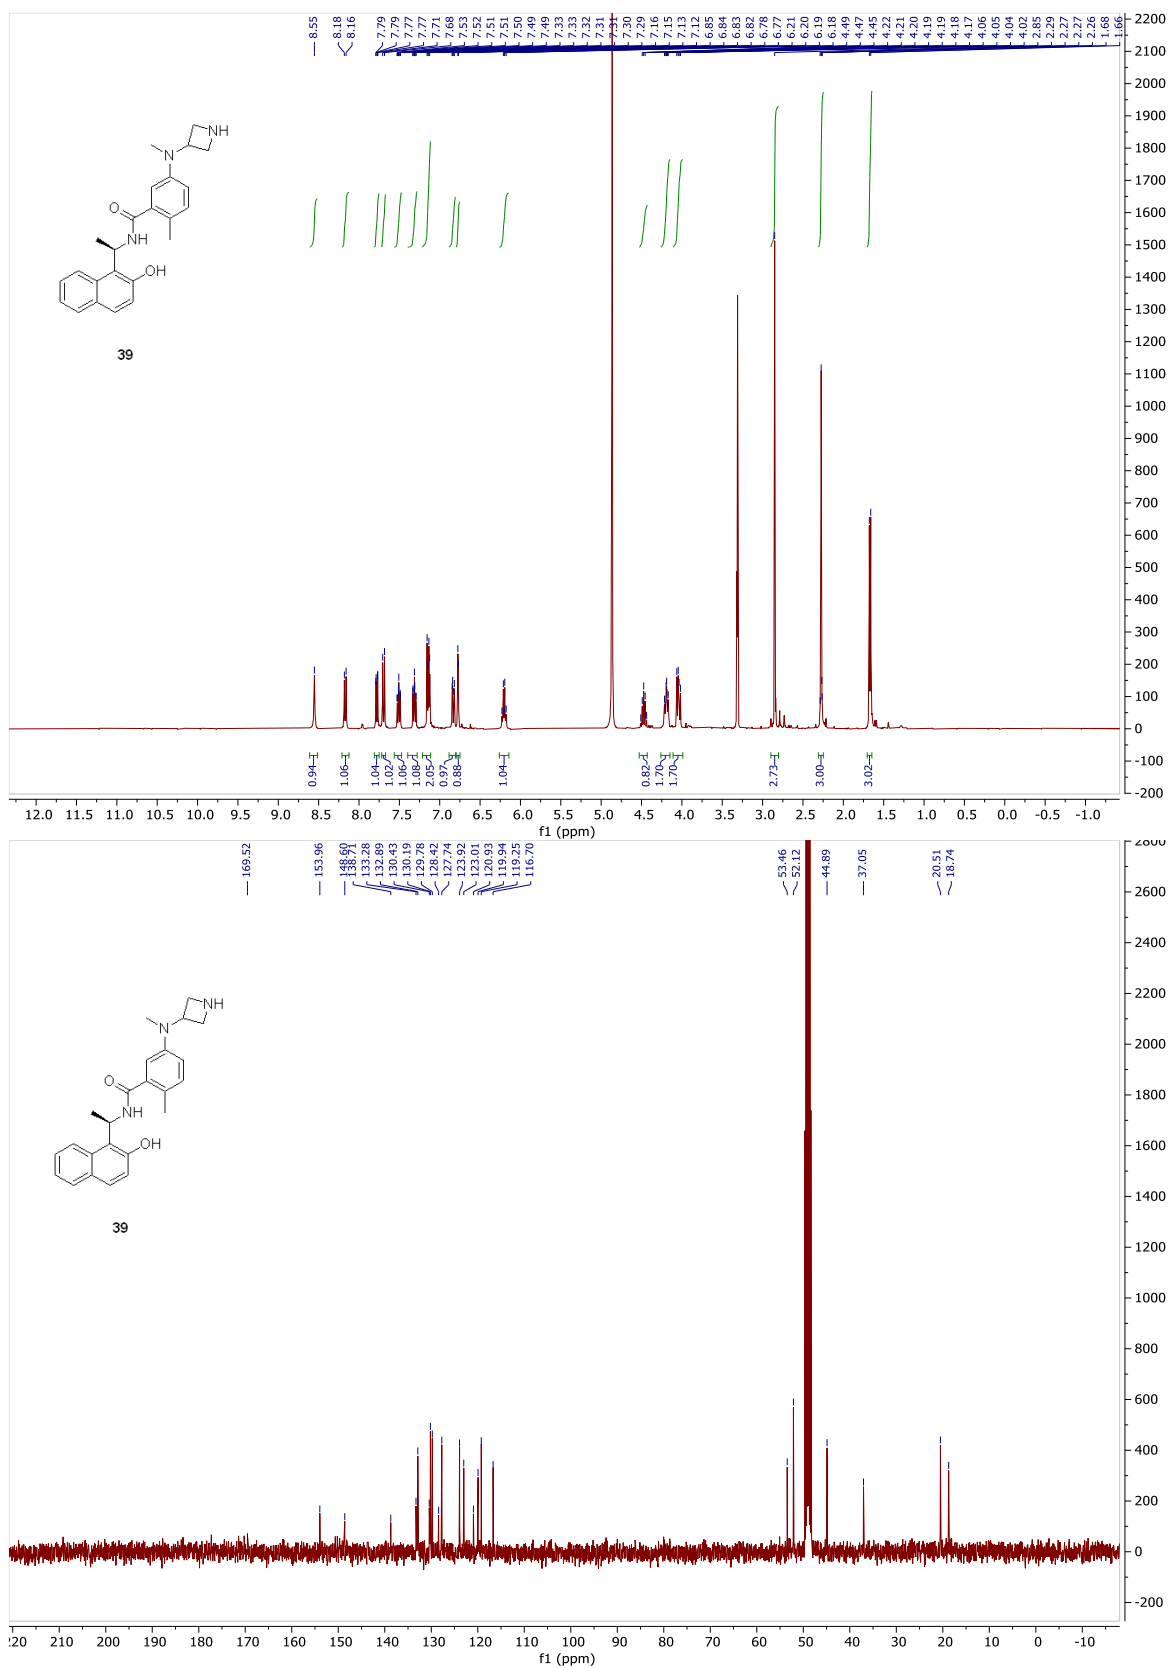

## Compound 40

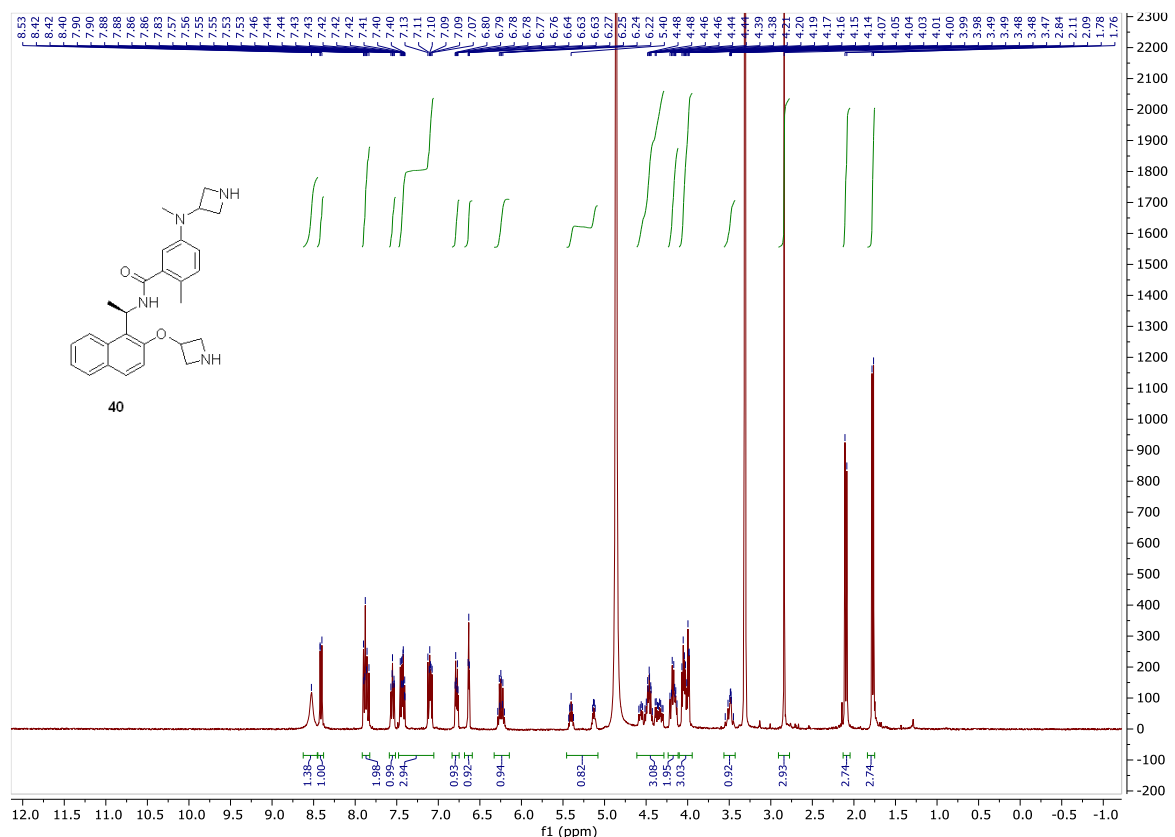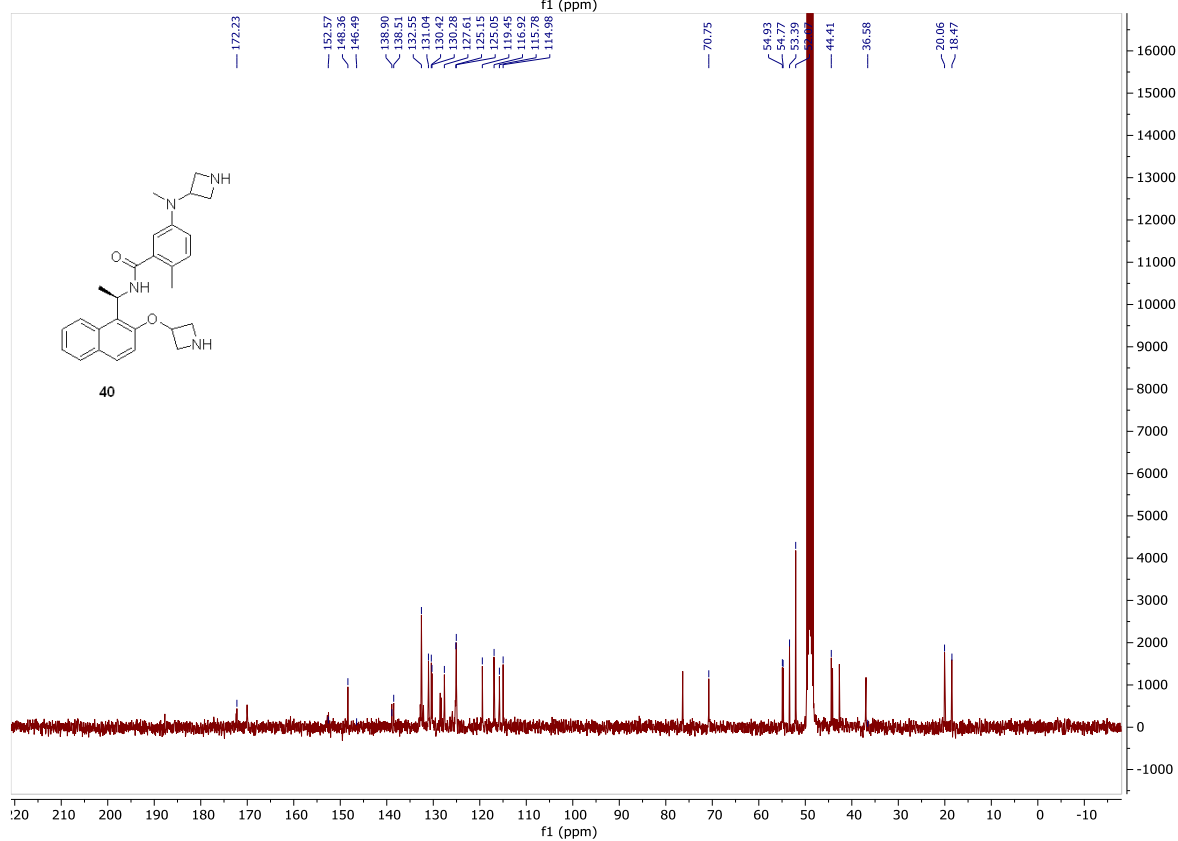



## Compound 43

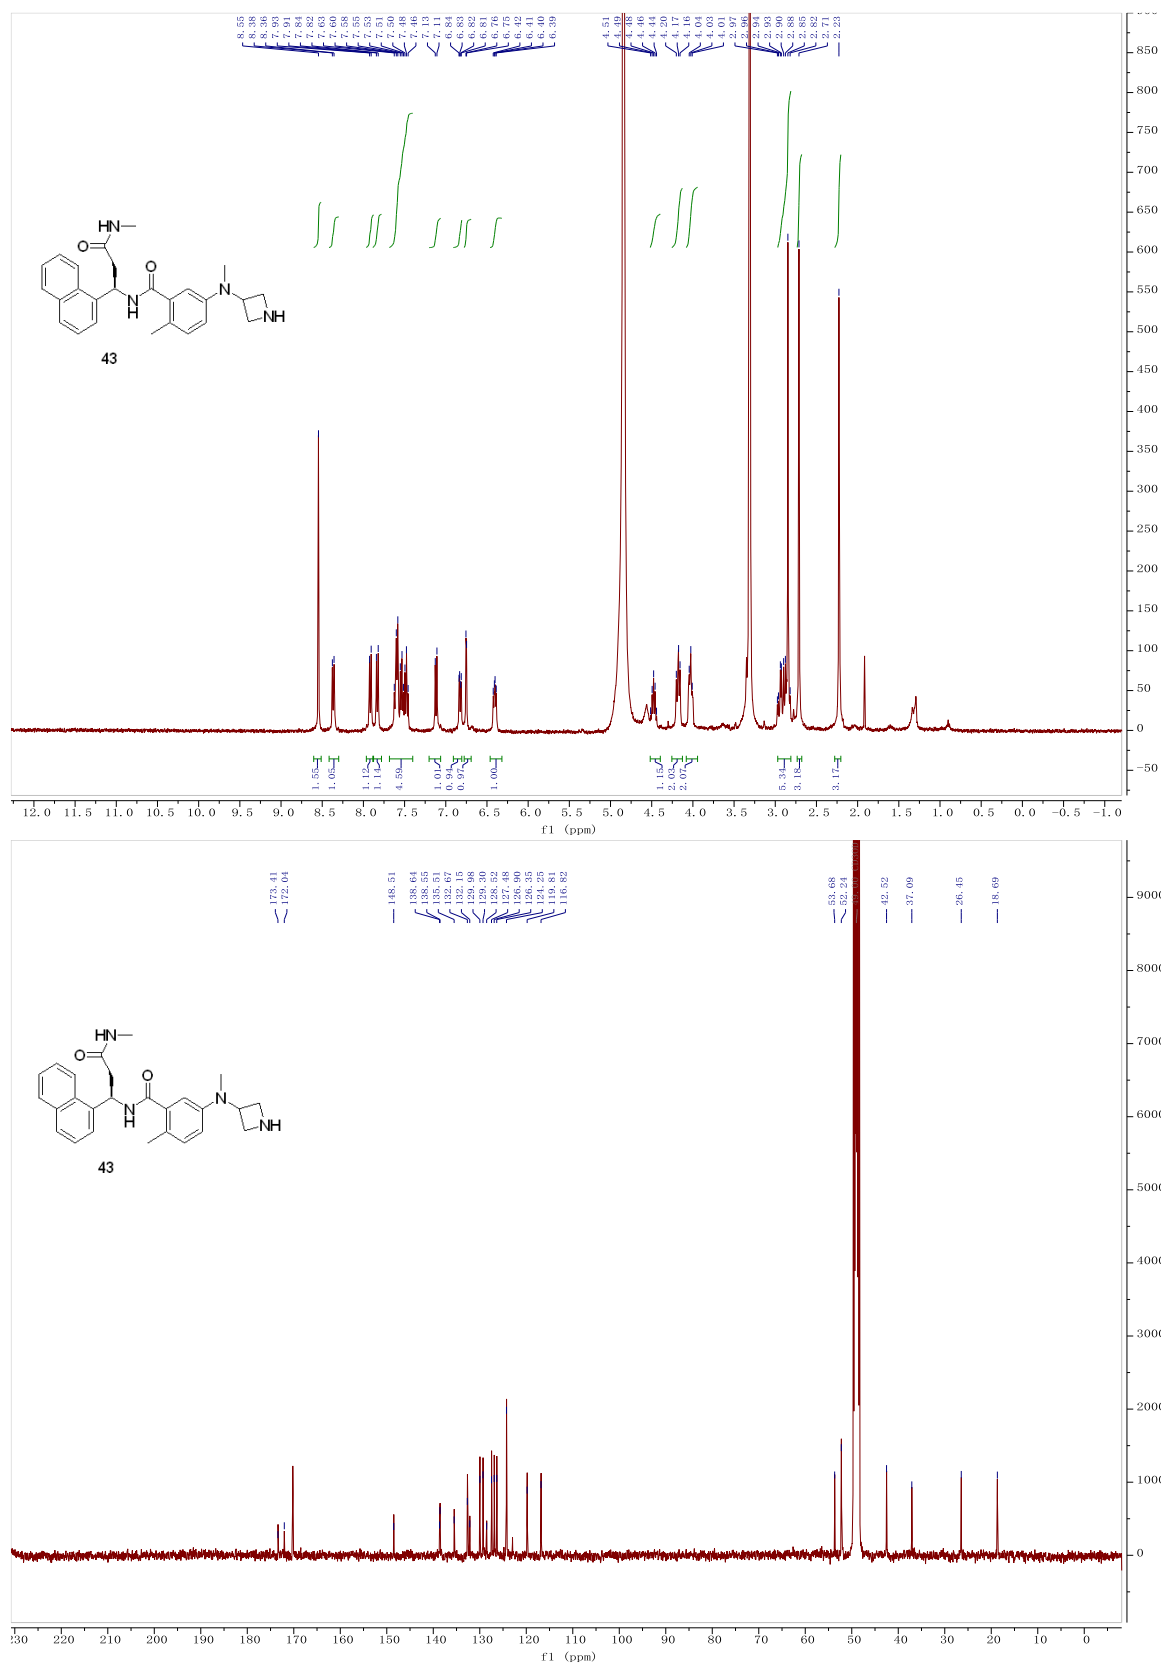

## Compound 47

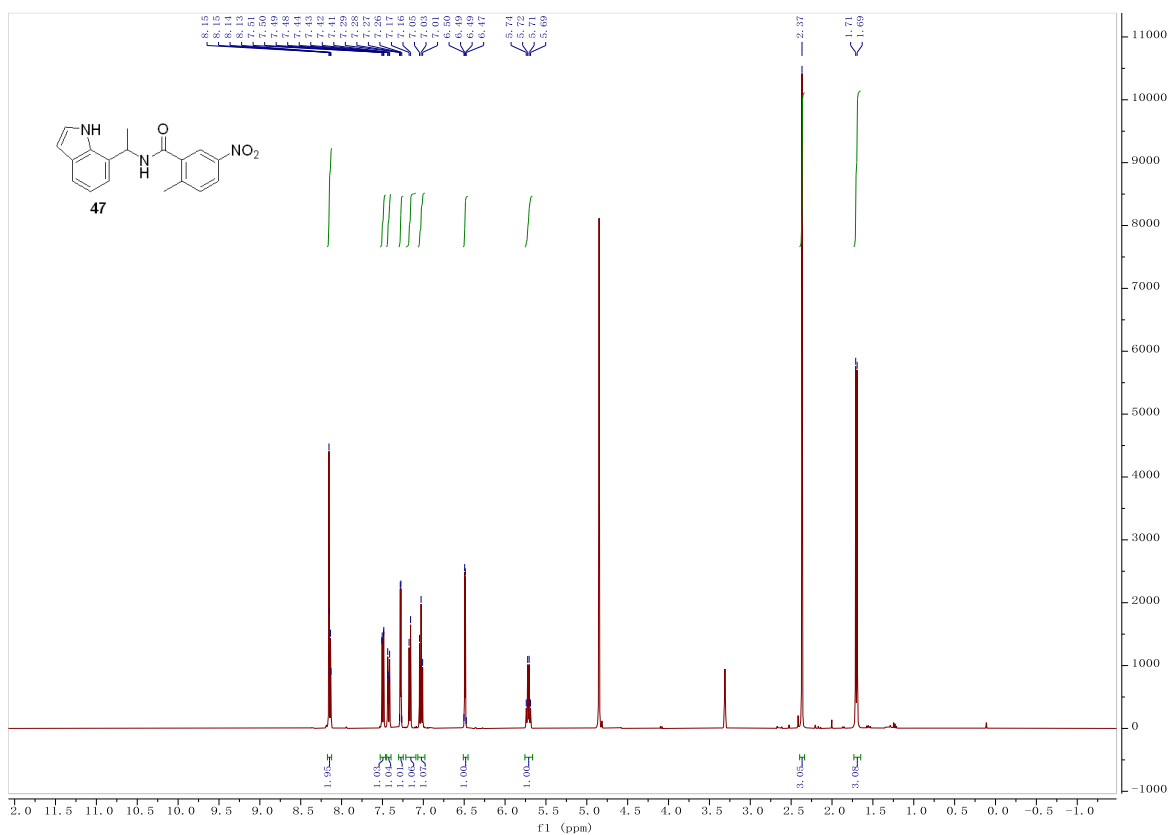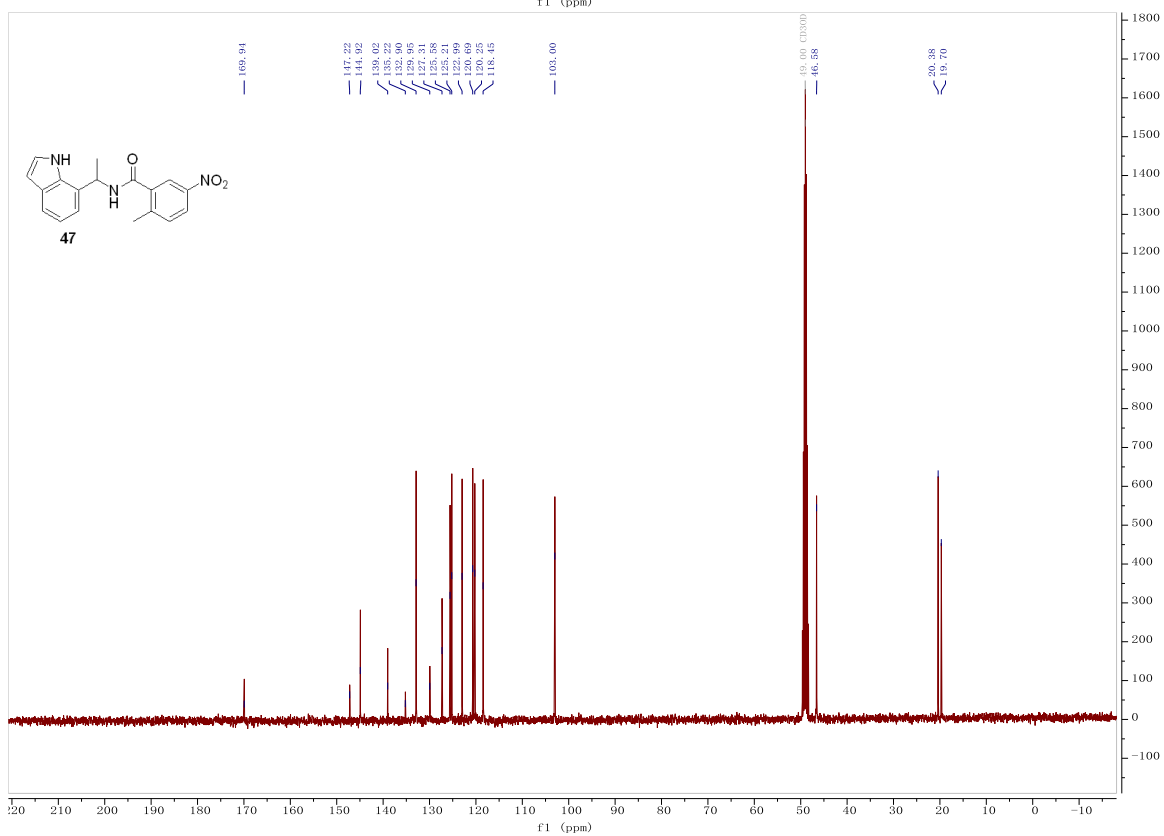

## Compound 48

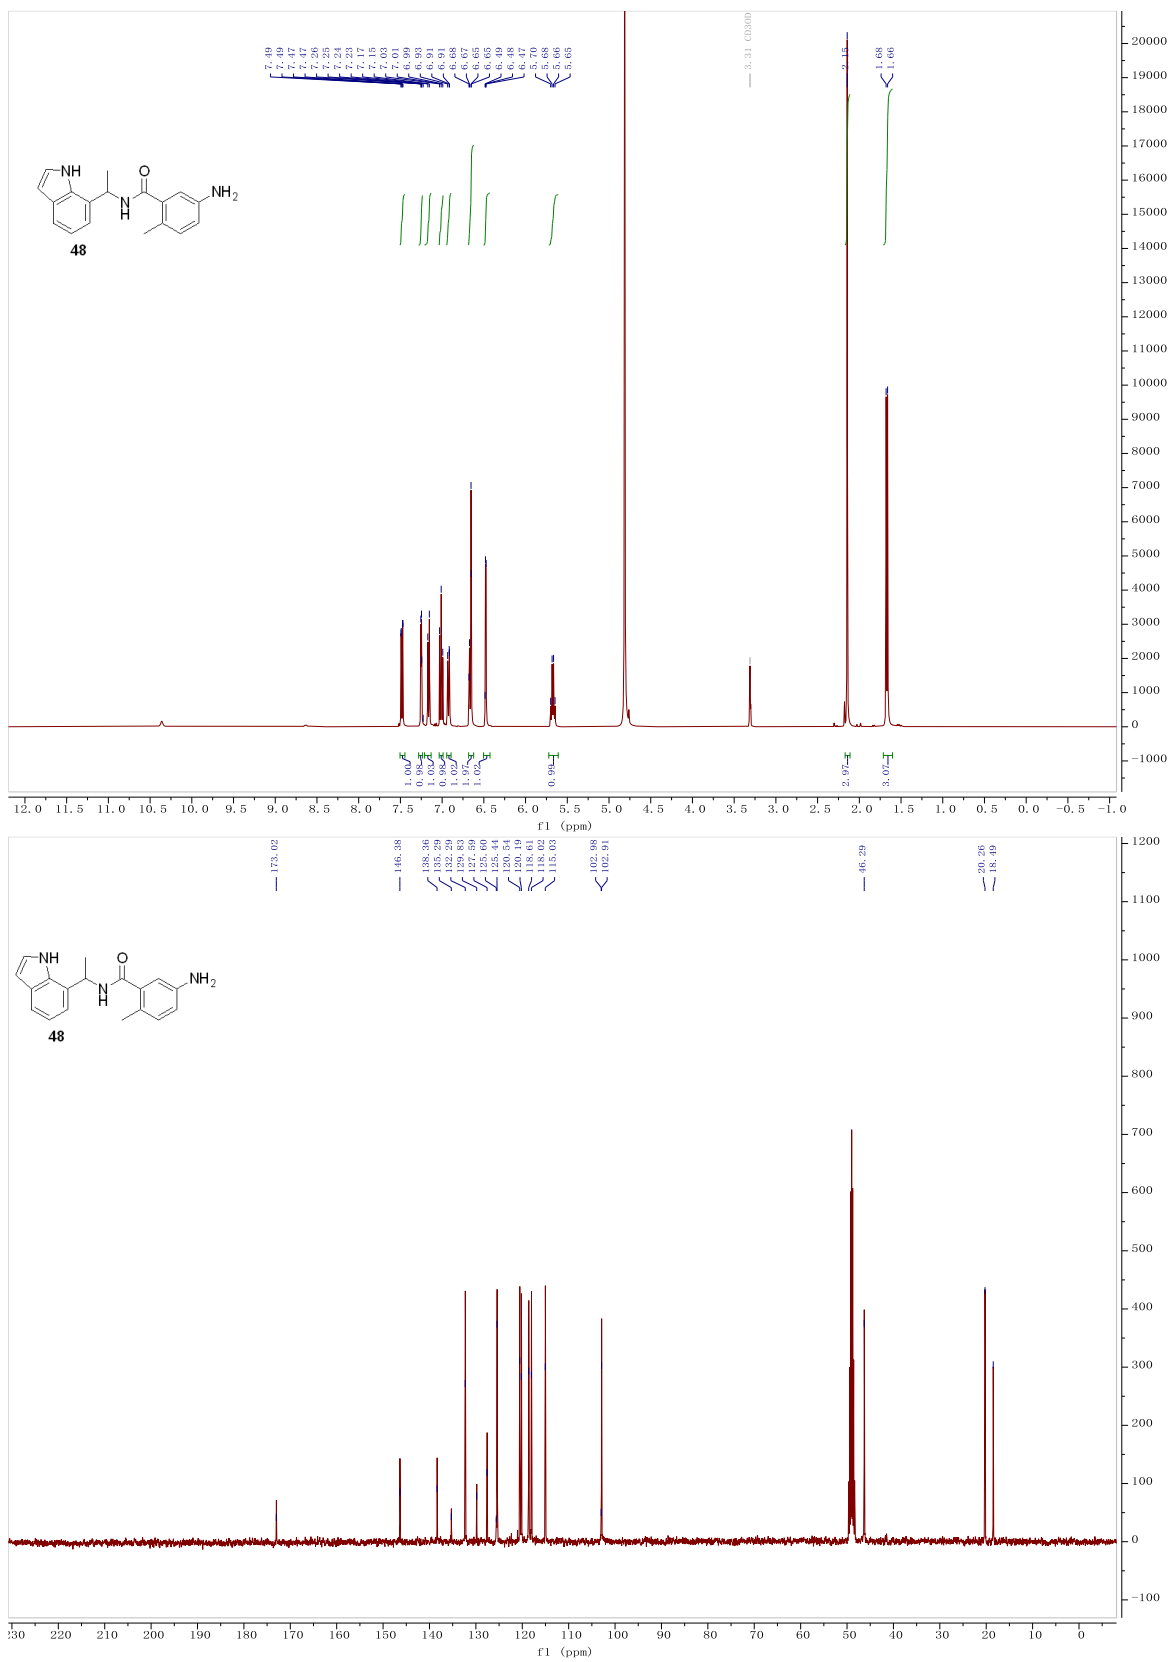

## Compound 52

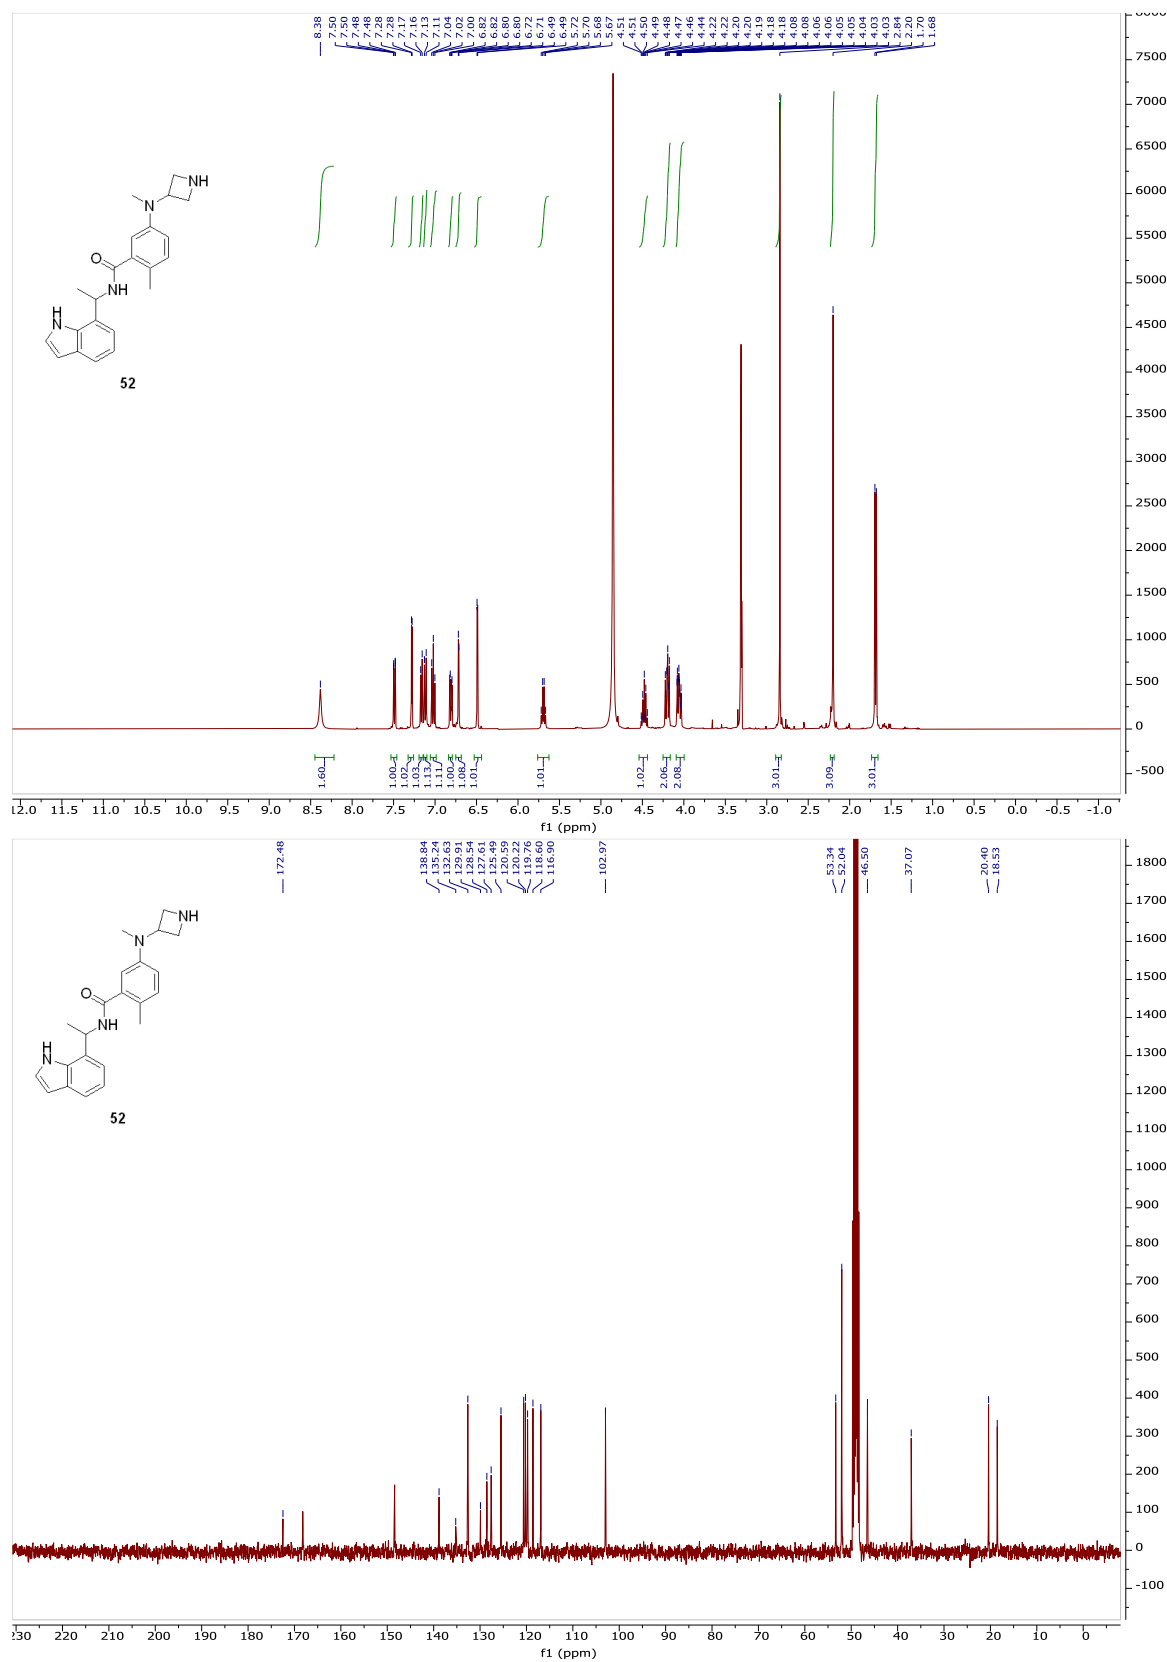

## Compound 55

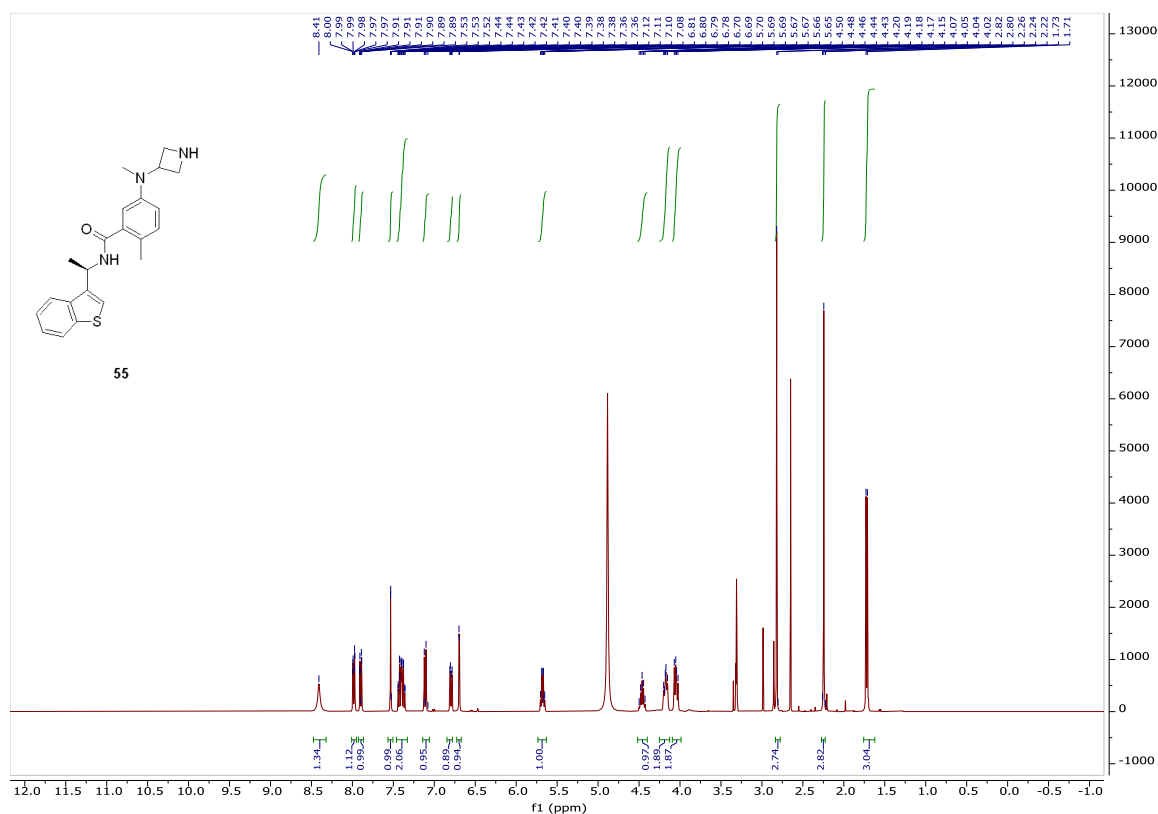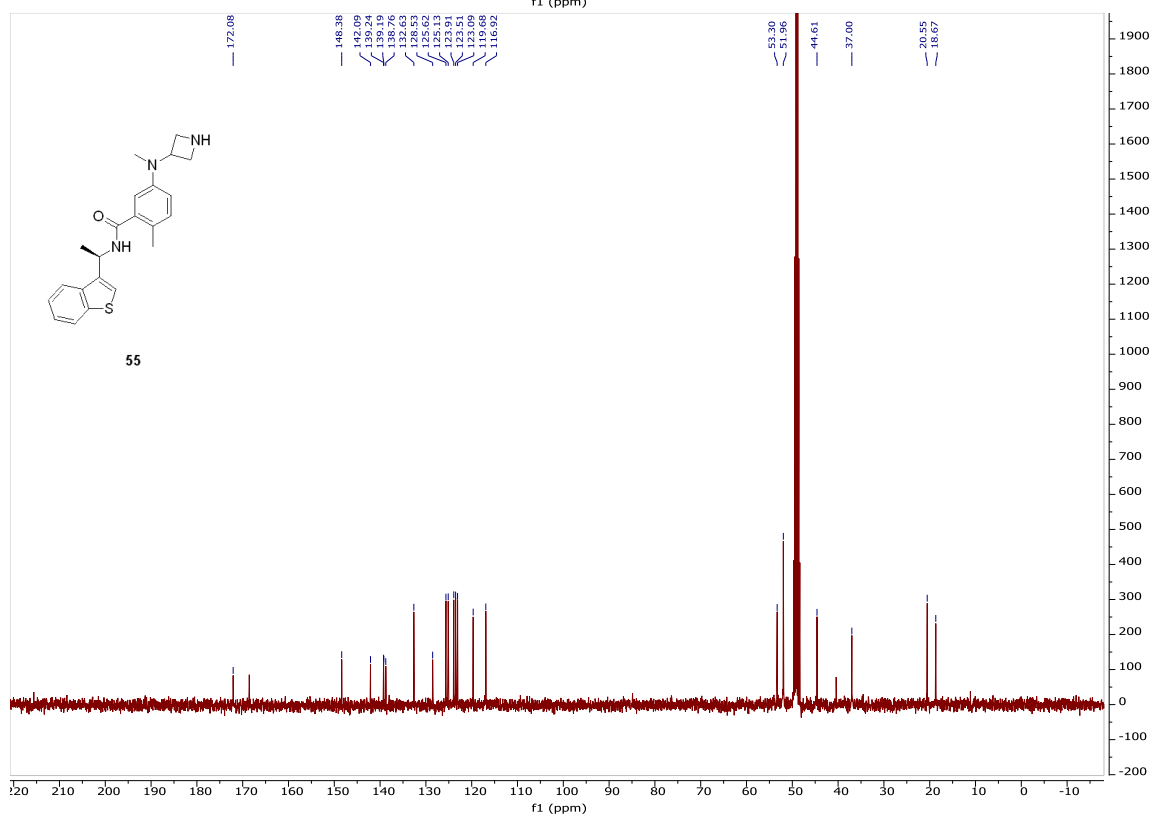

## Compound 56

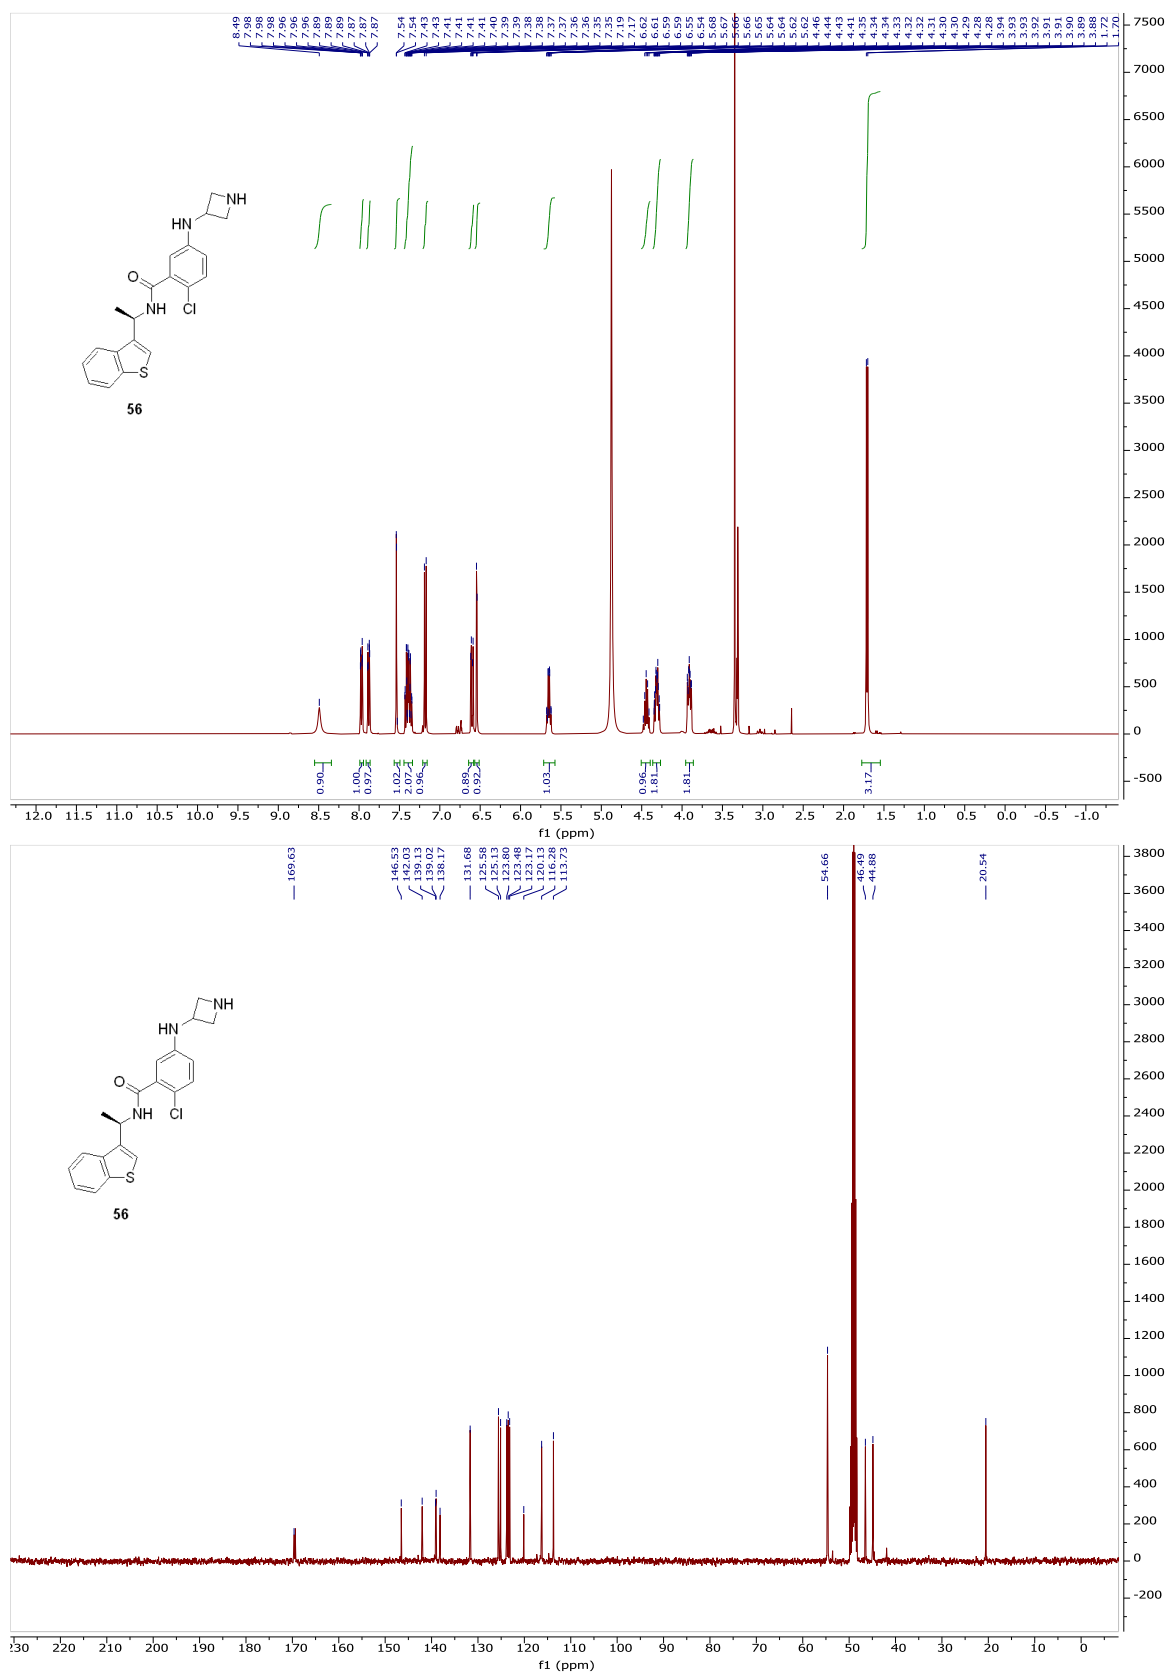

## Compound 57

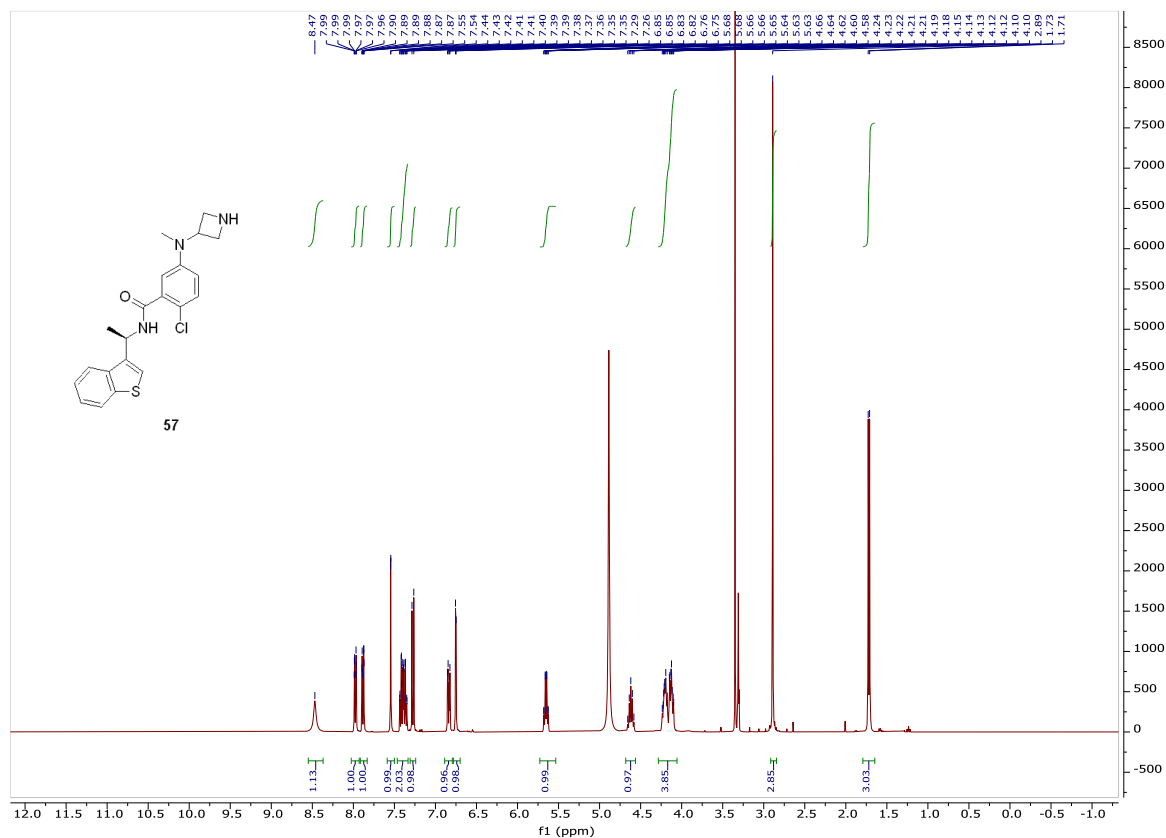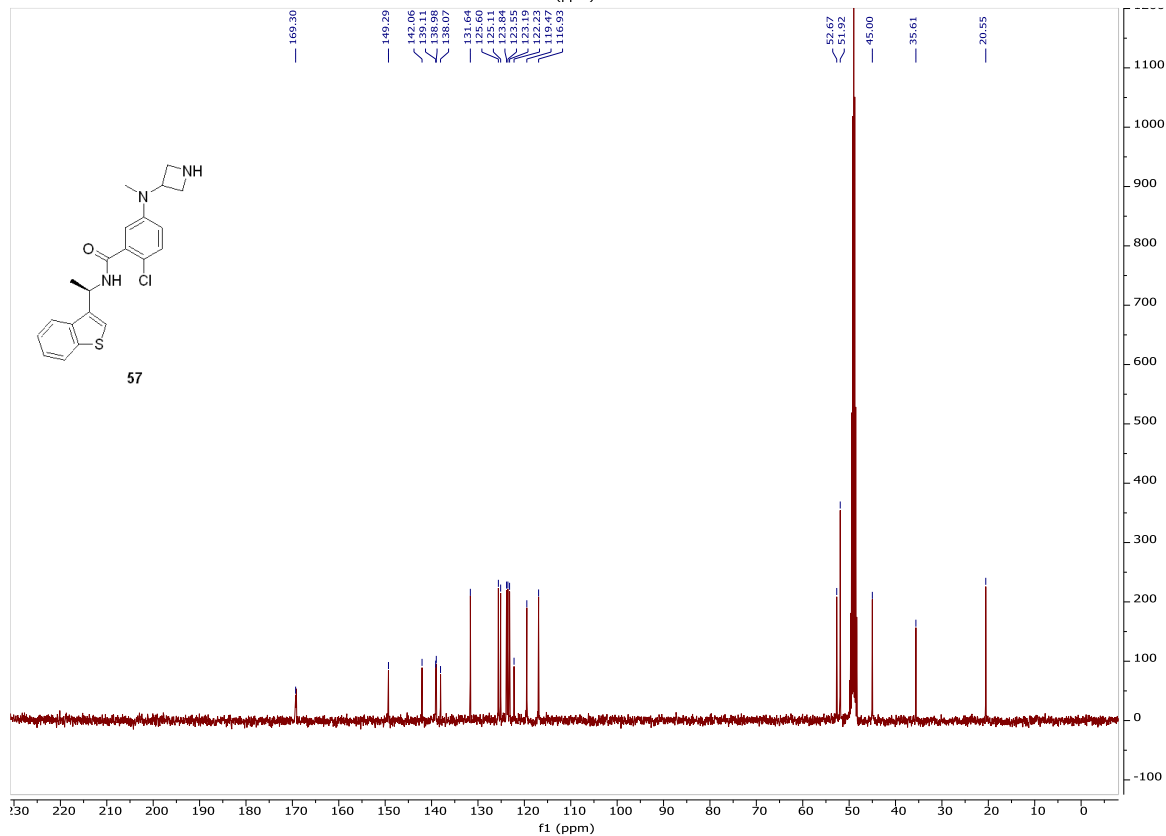

## Compound 58

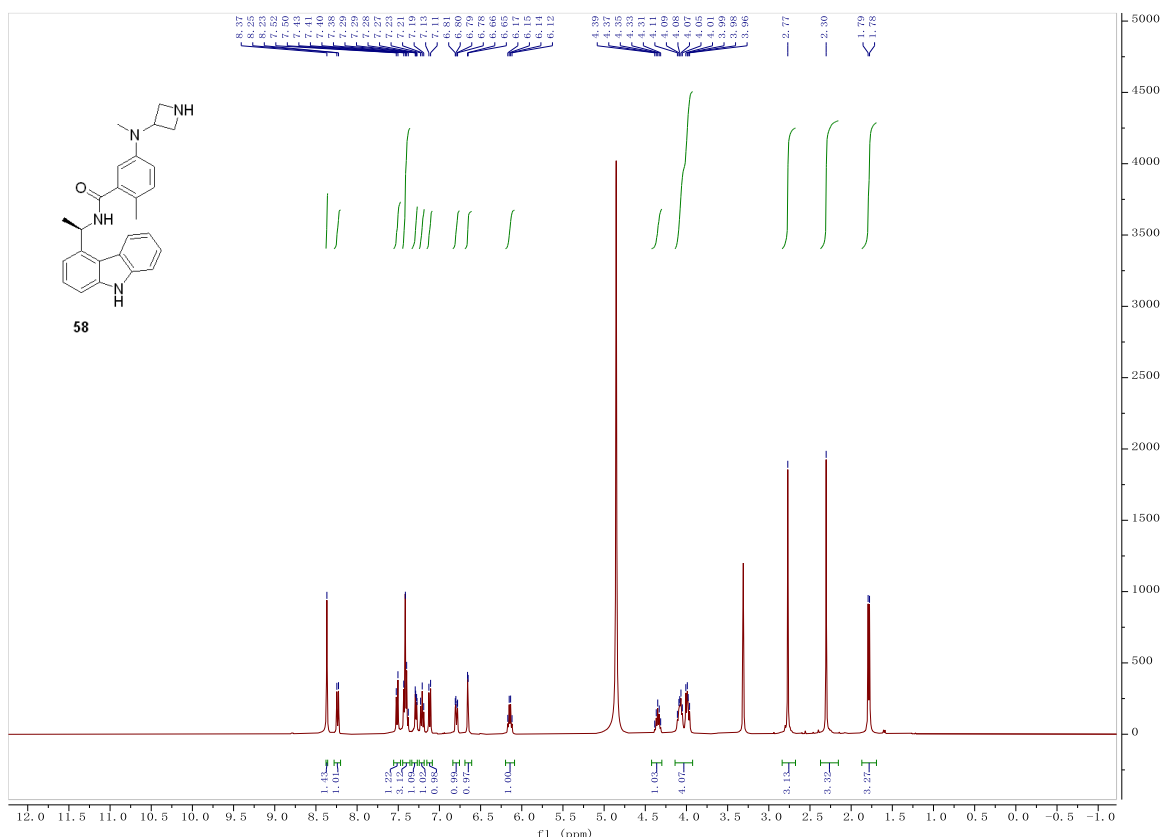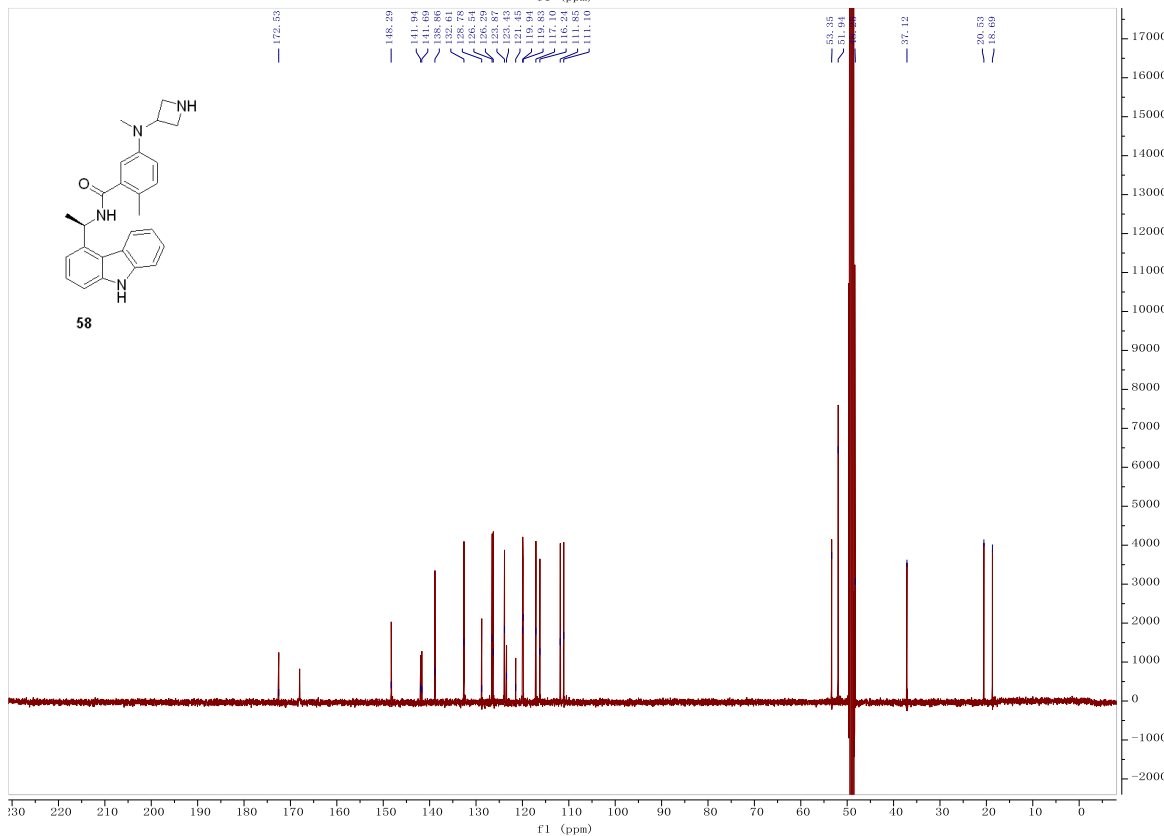



## Compound 59

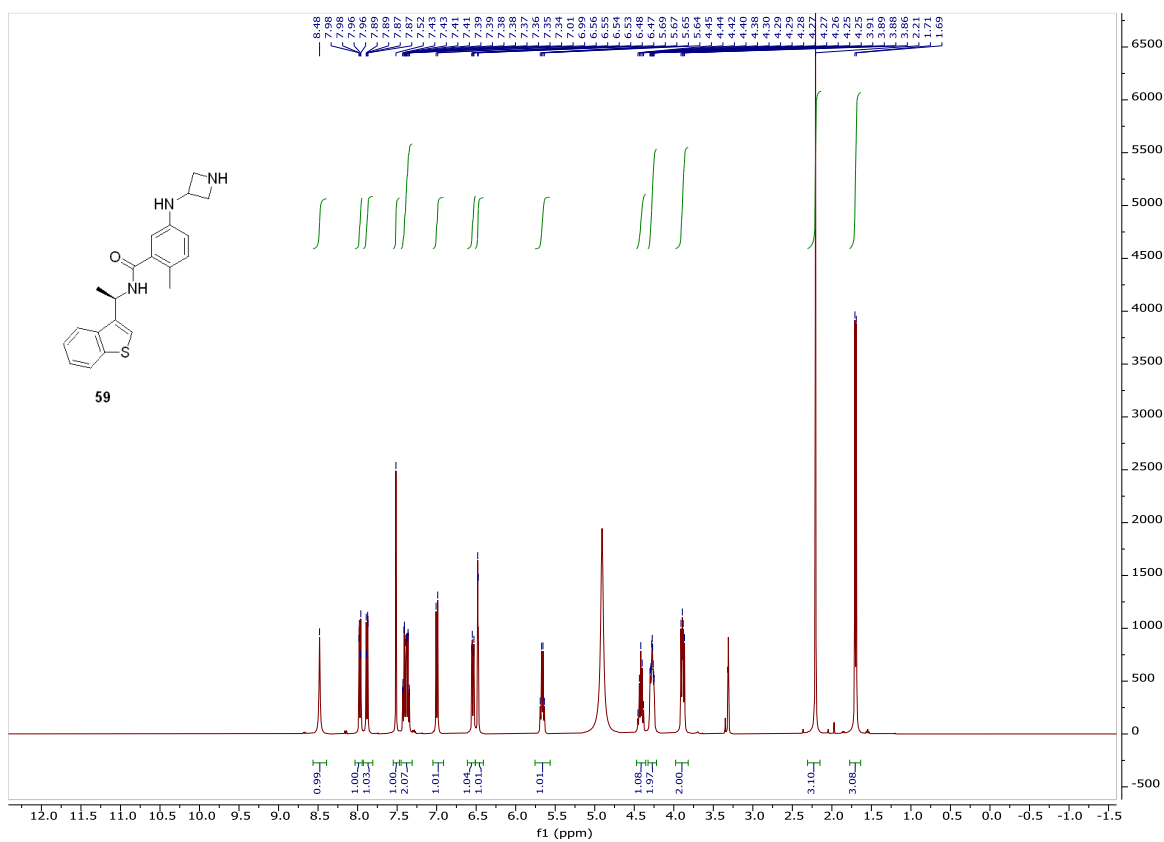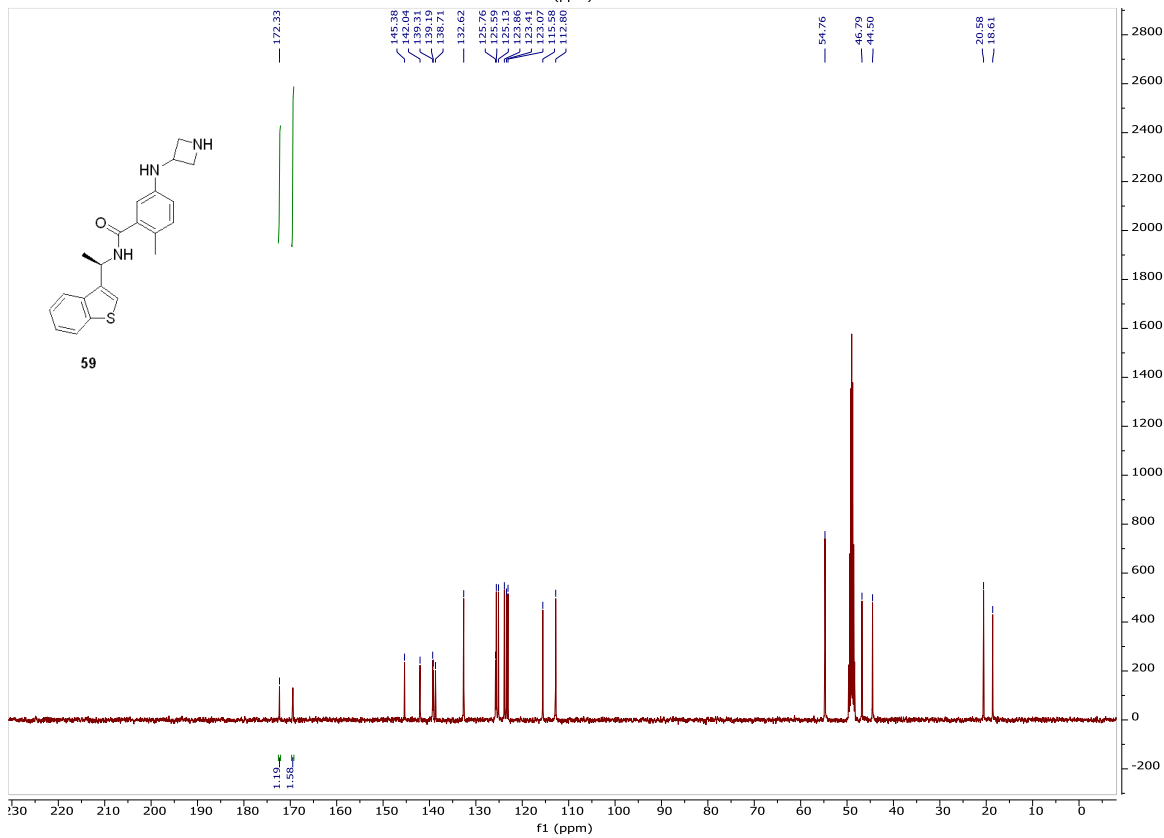

## Compound 60

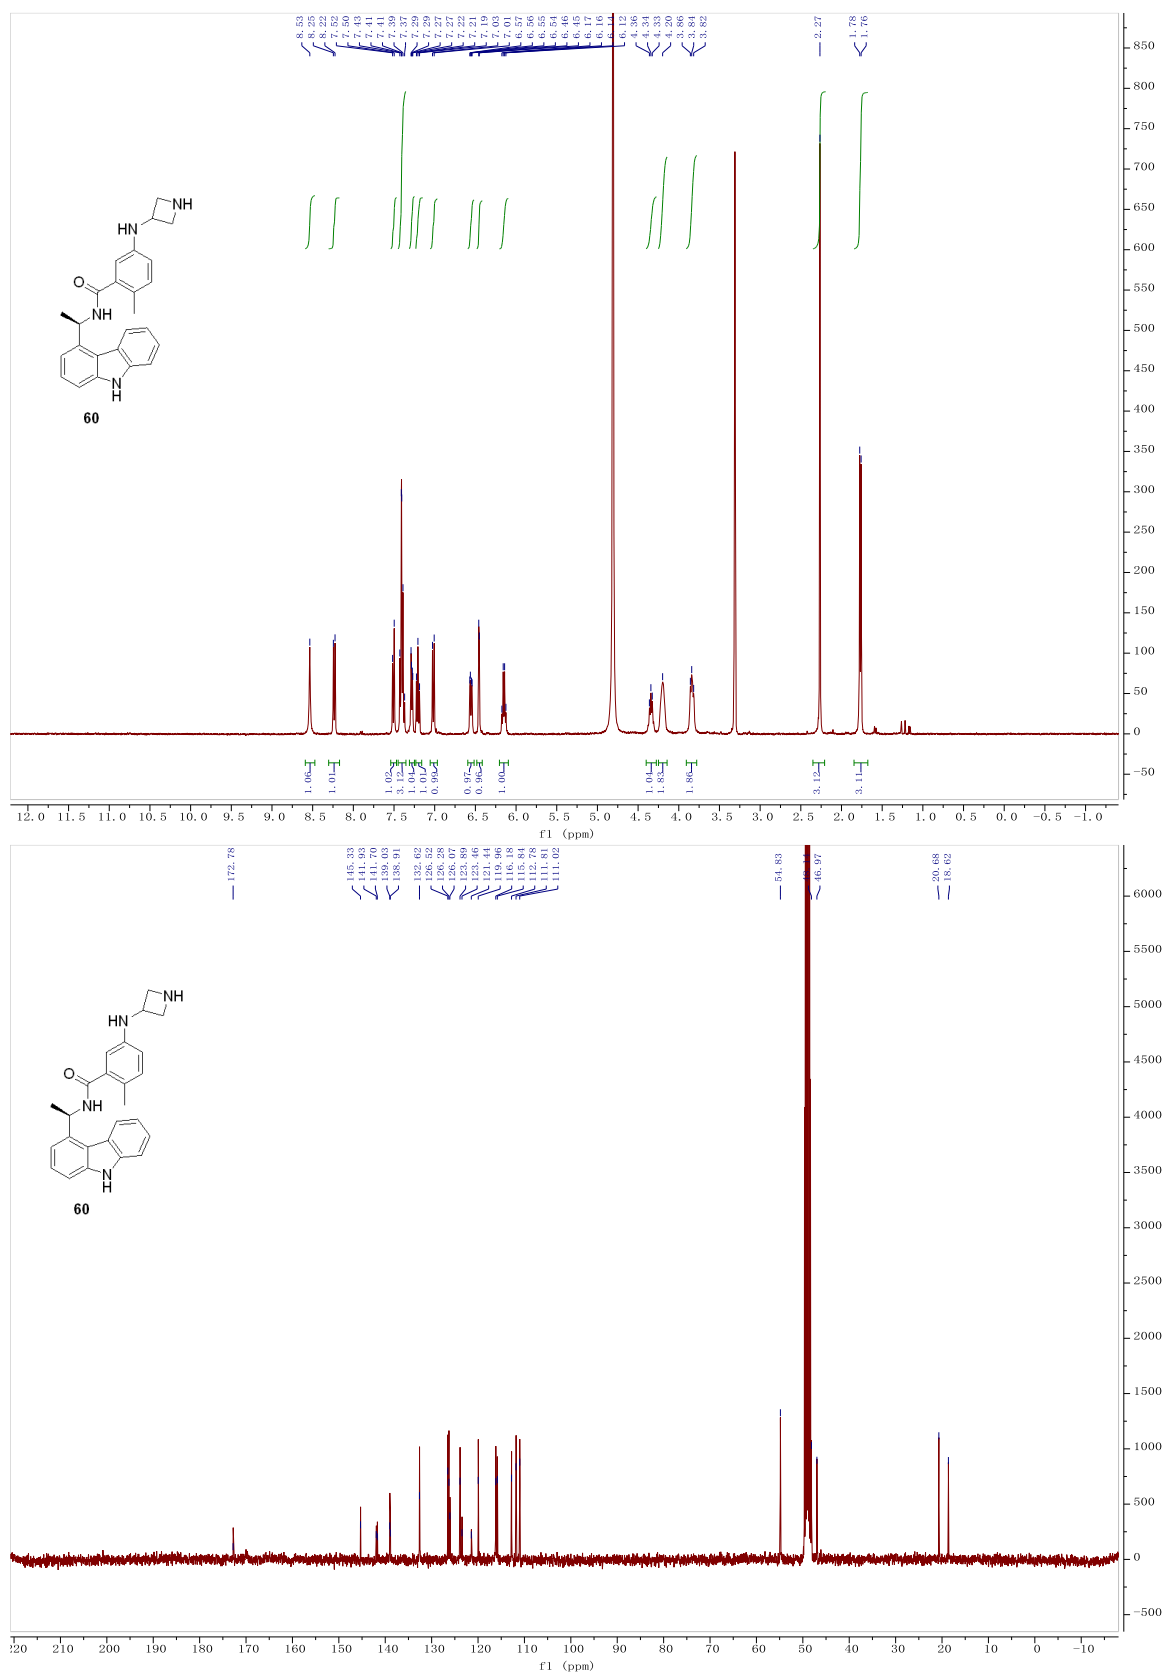

## Compound 61

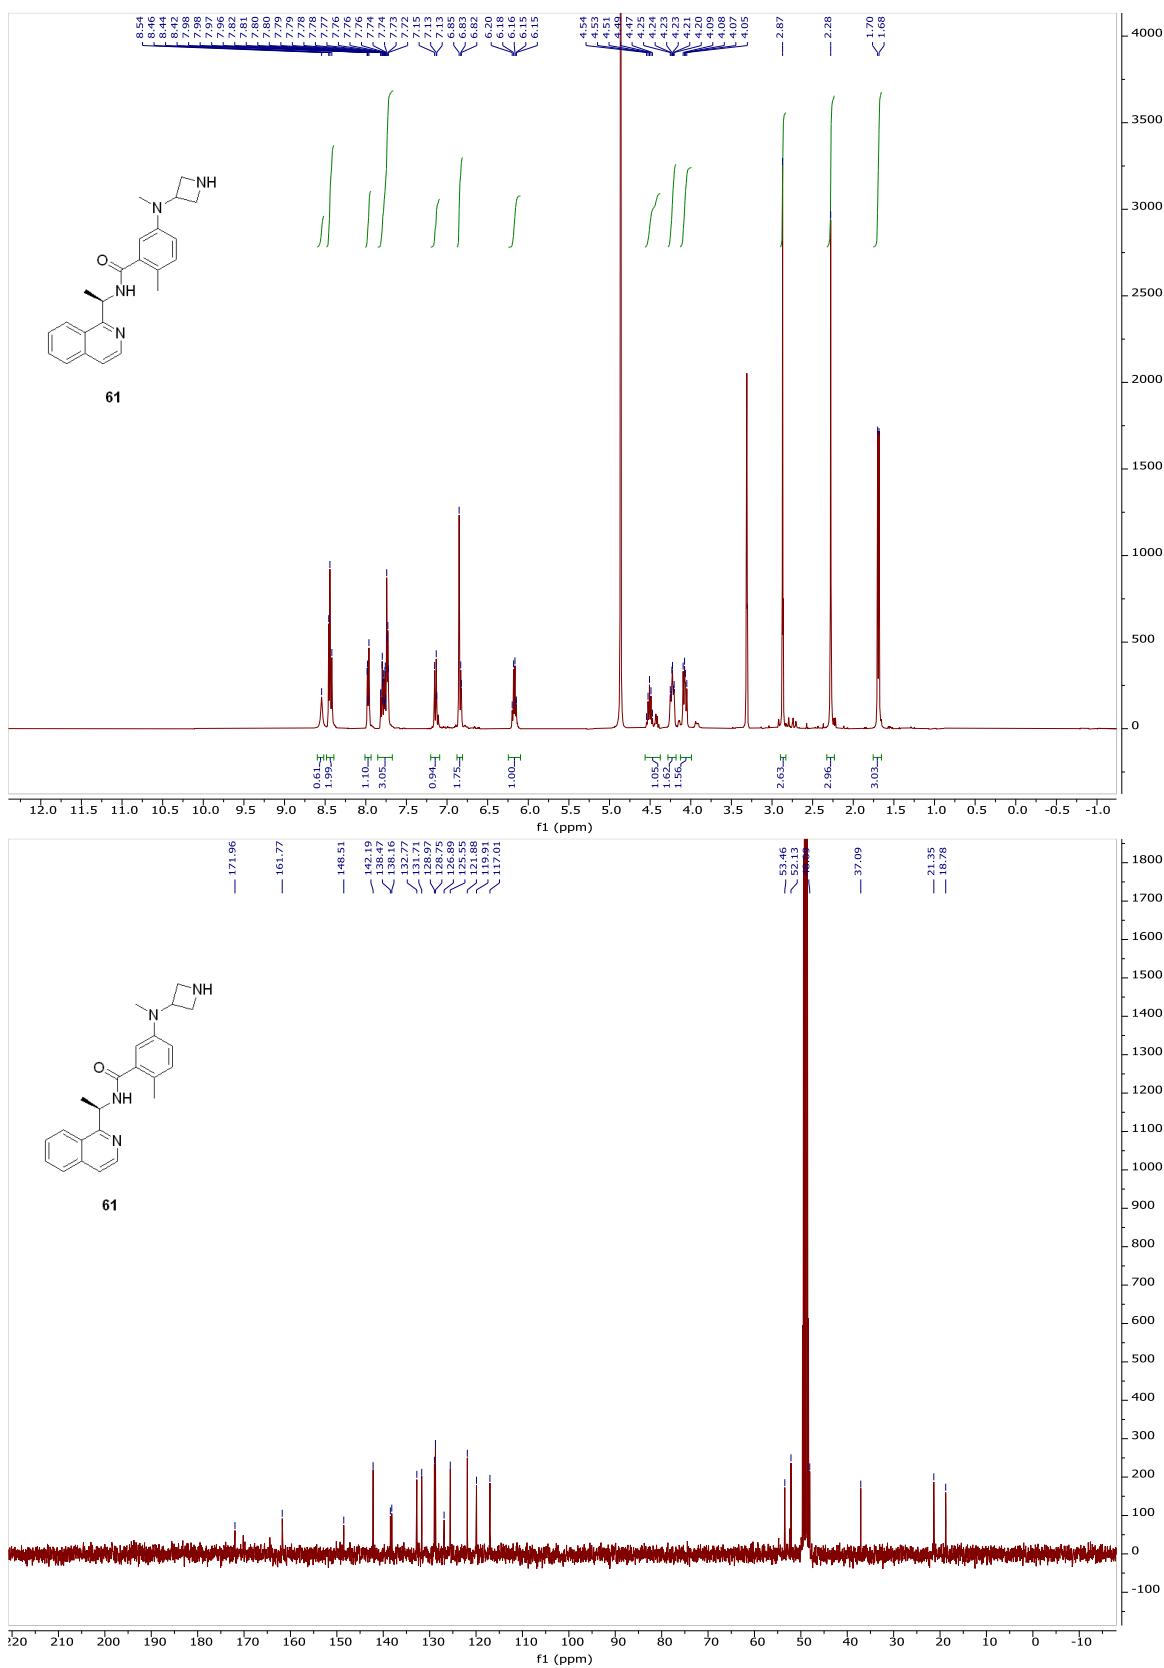

## Compound 63

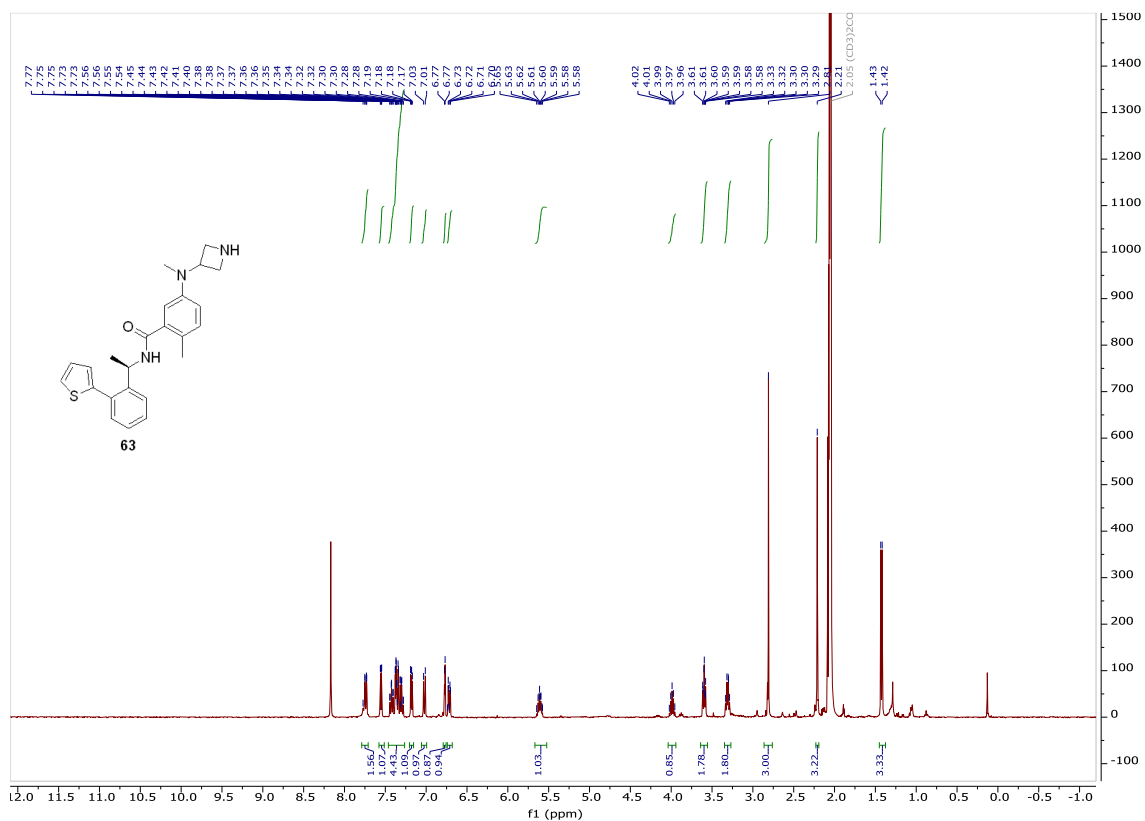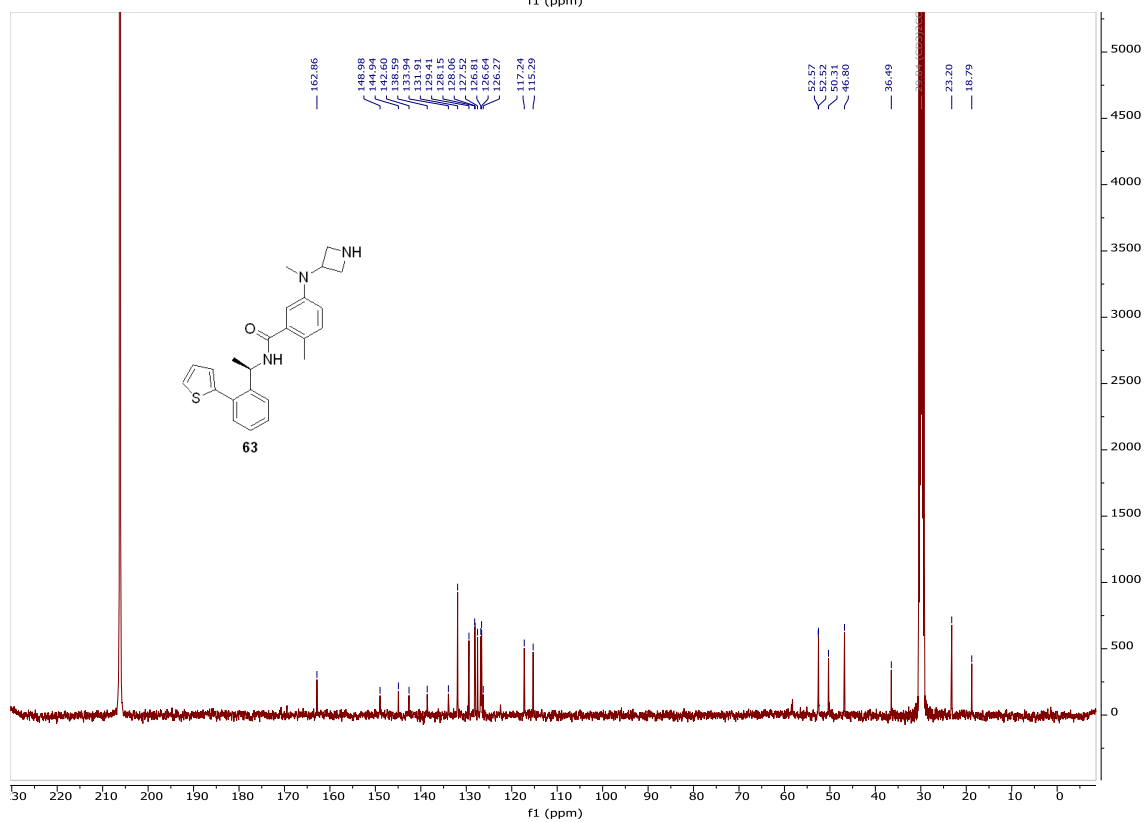

## Compound 64

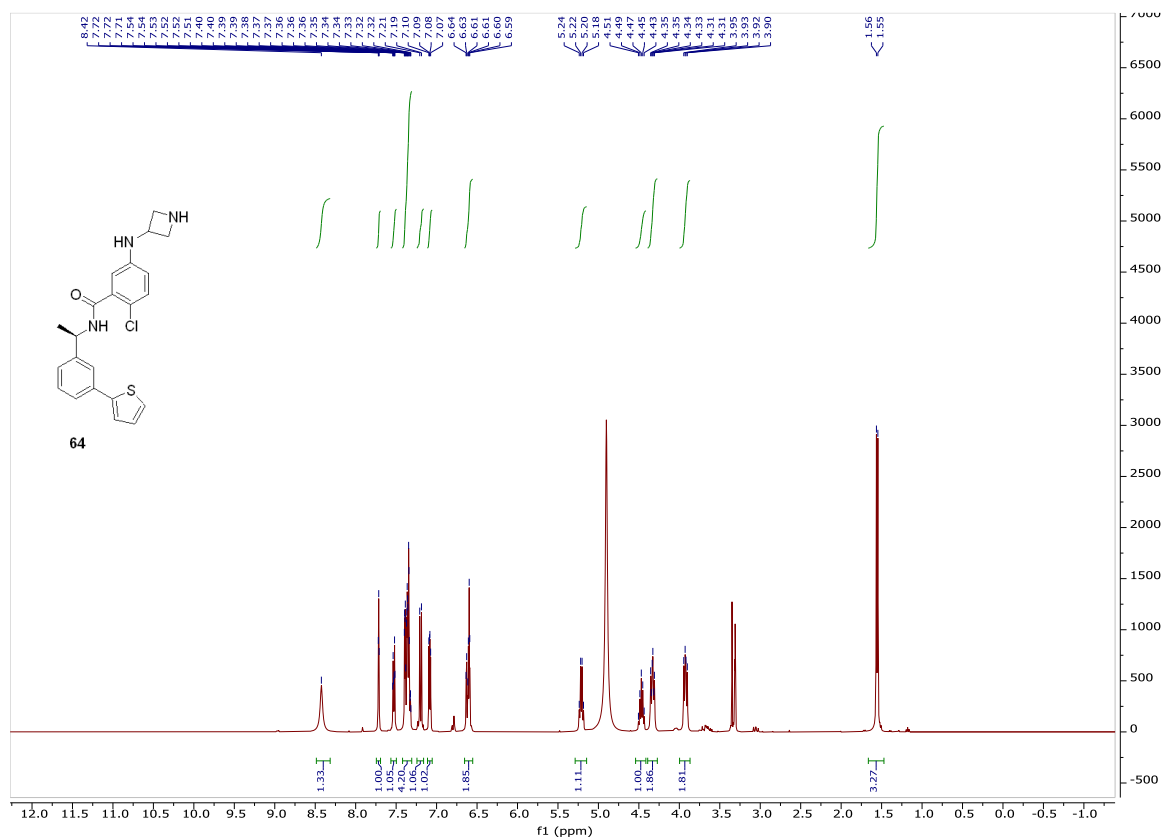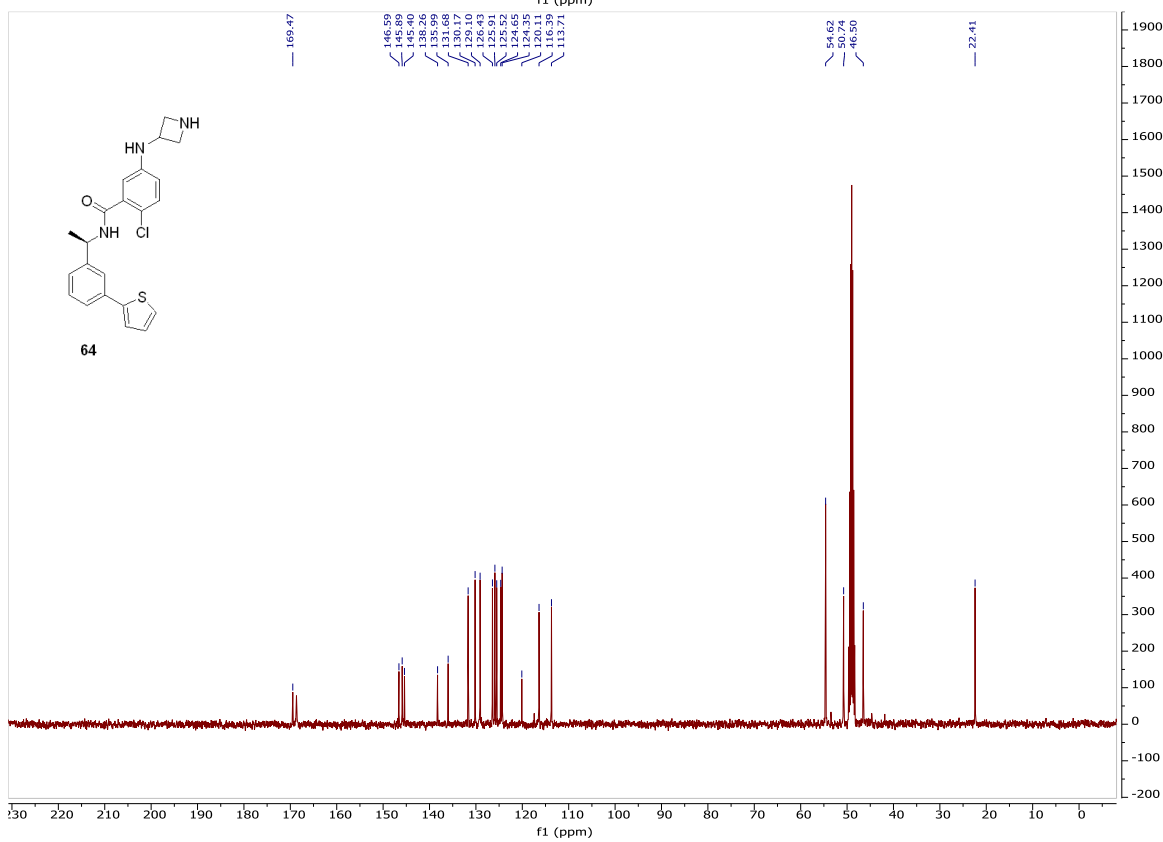

## Compound 65

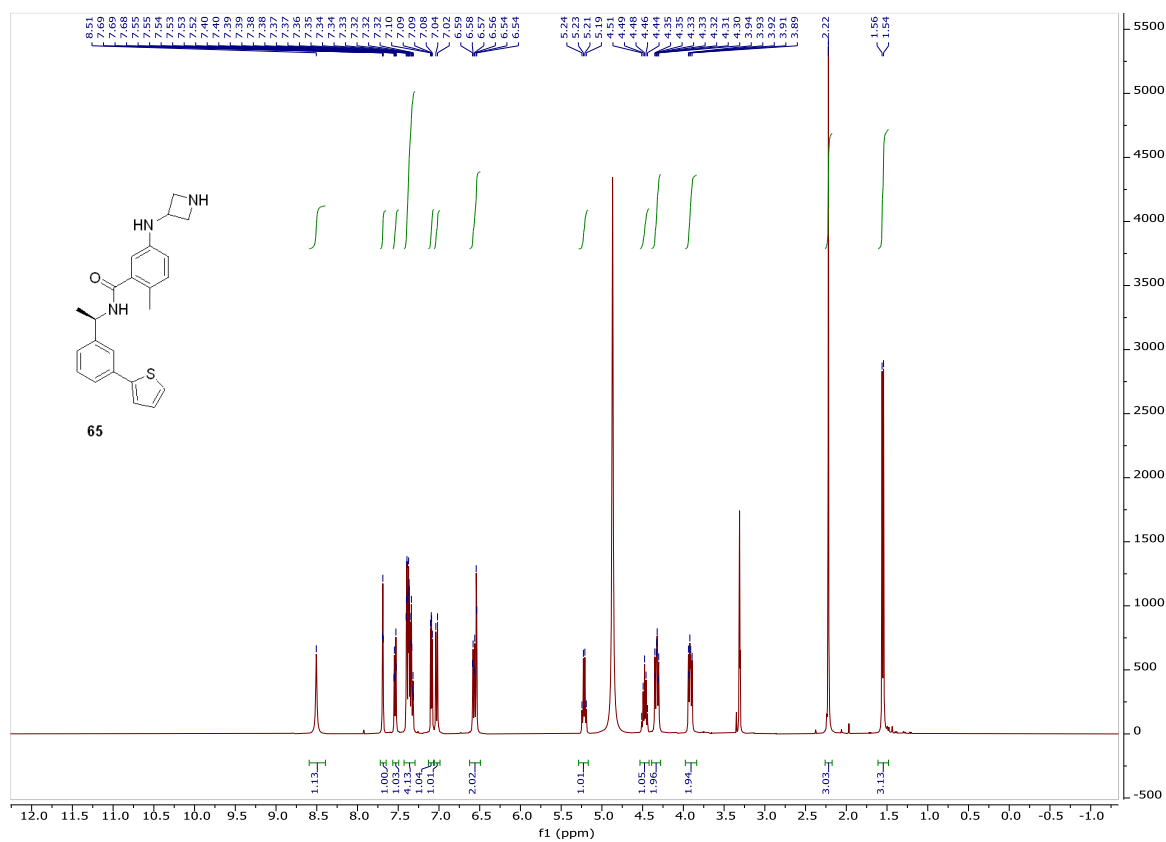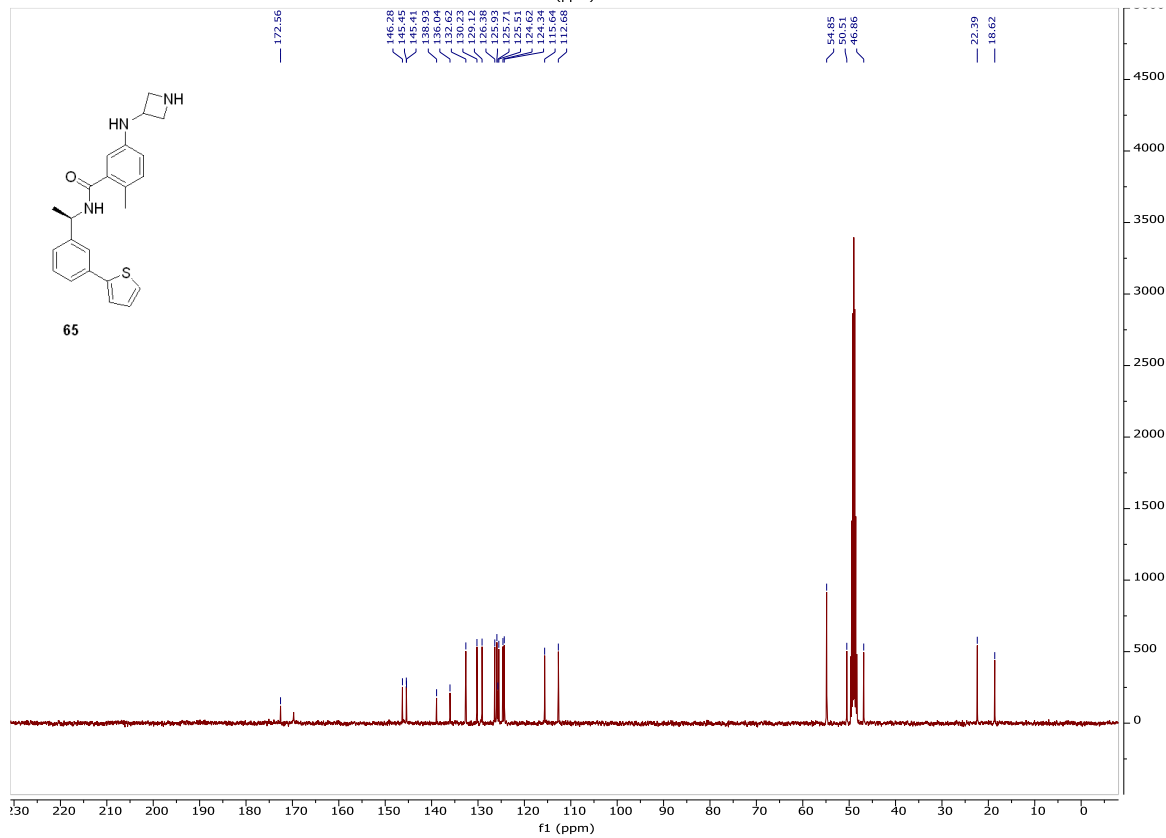

## Compound 66

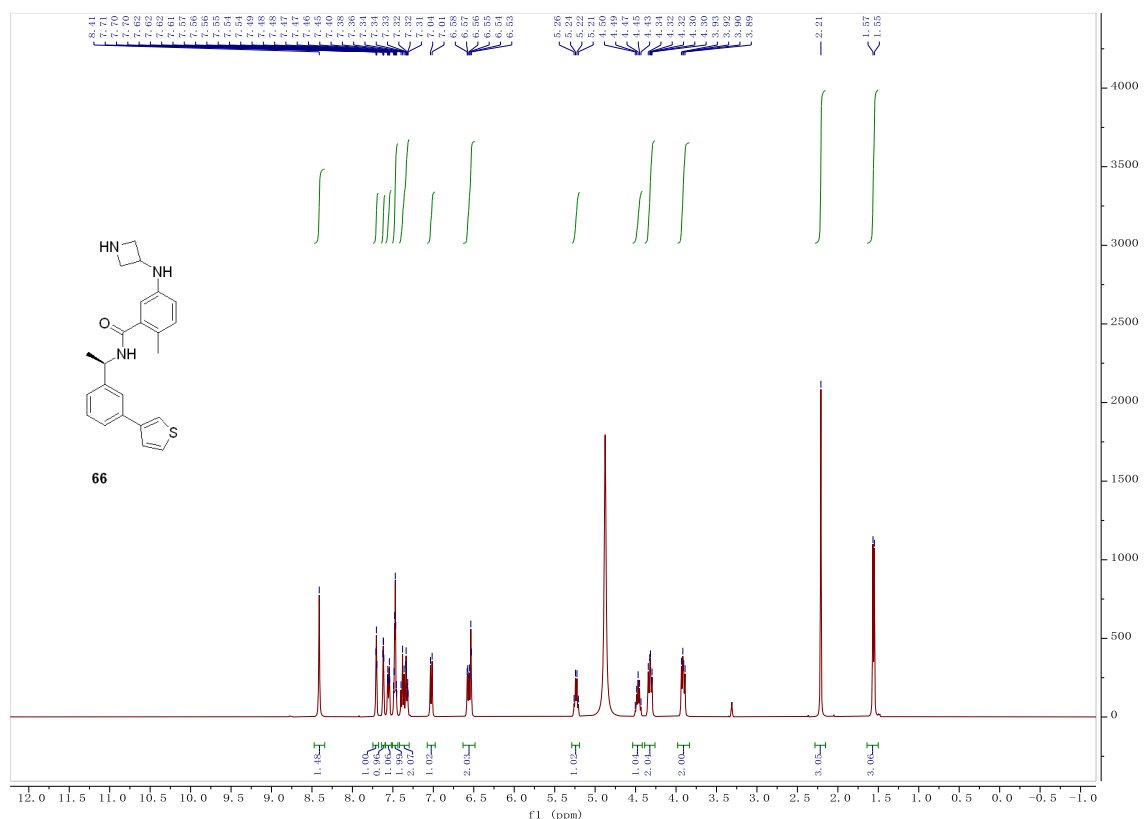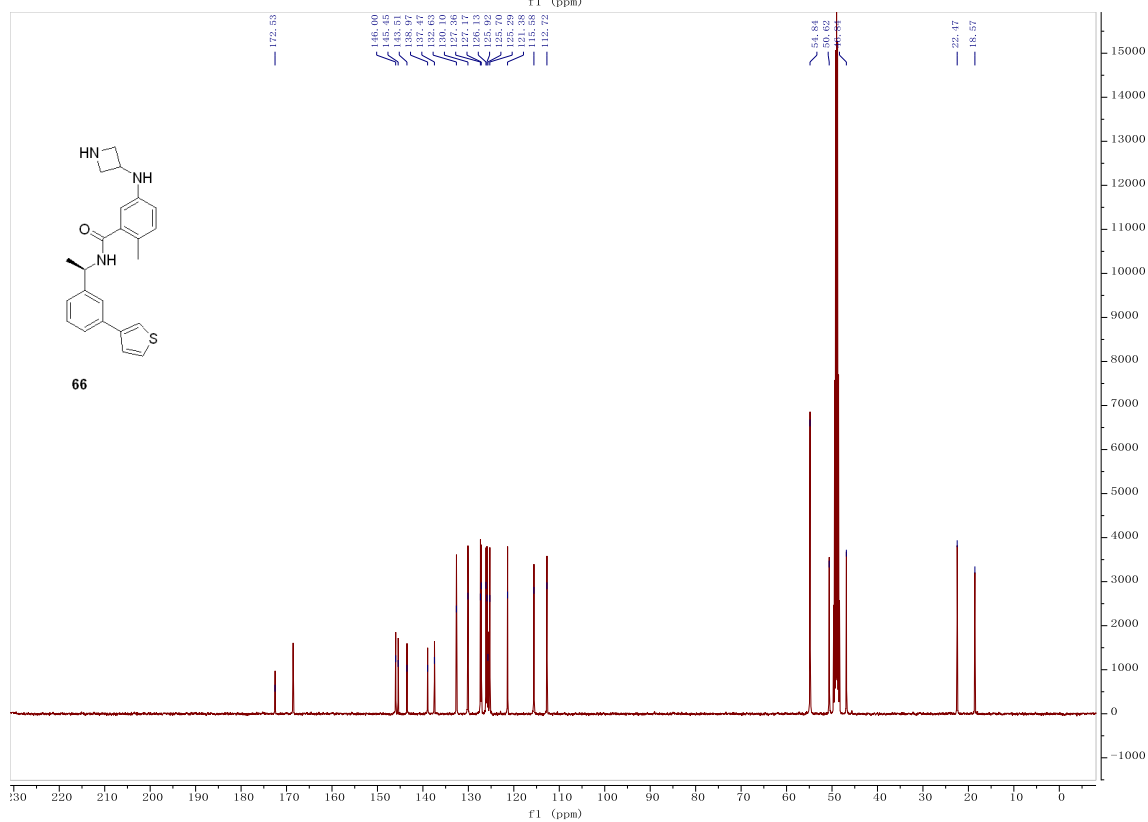

## Compound 67

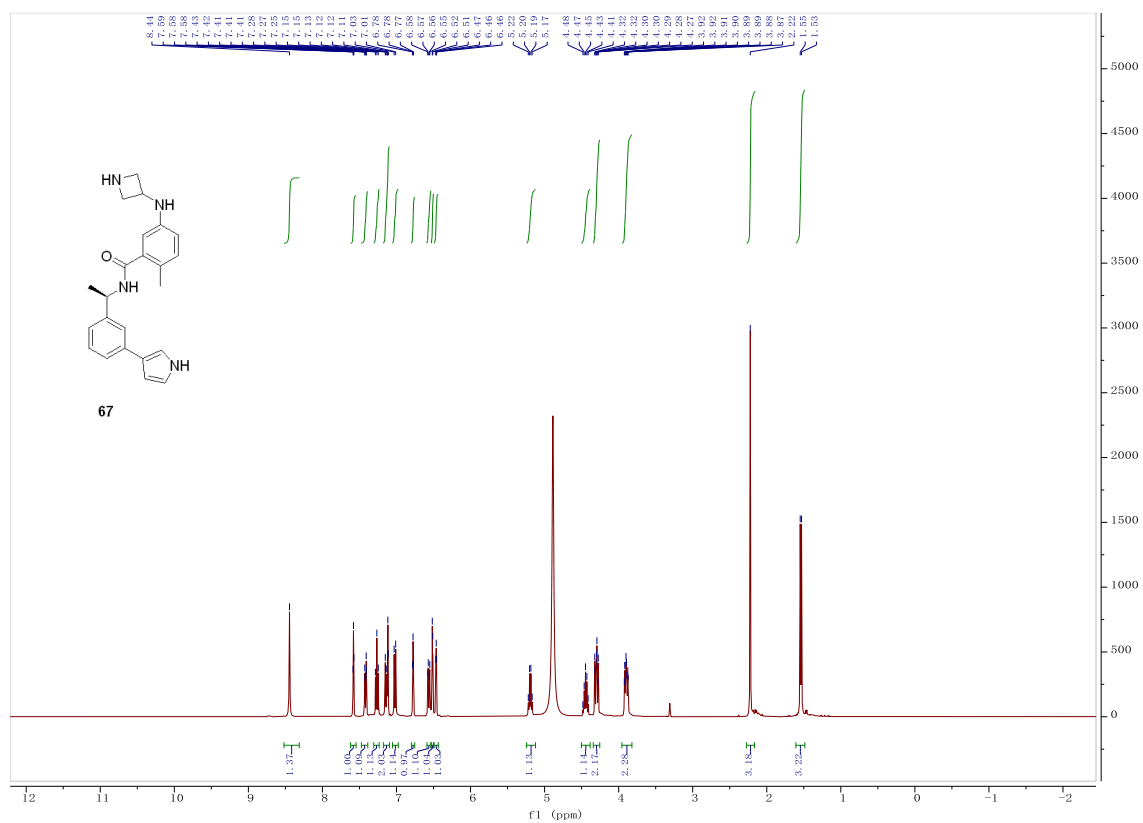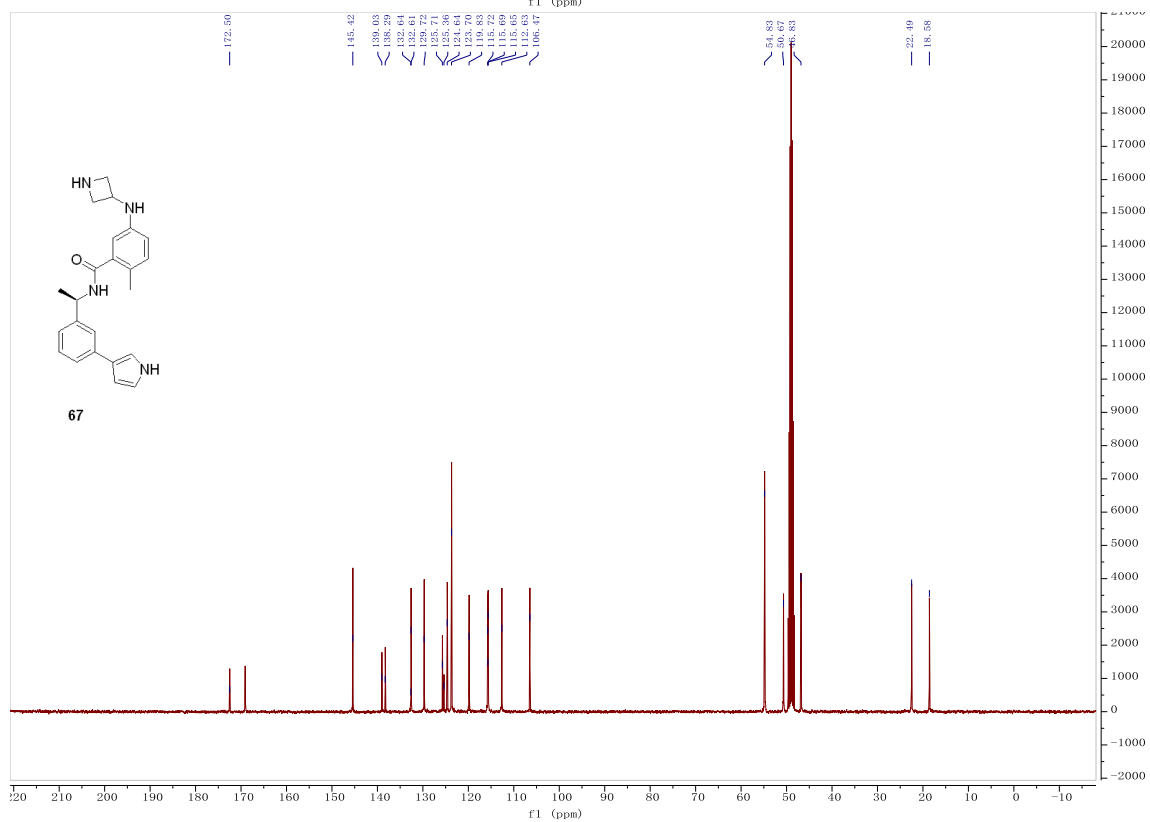



## Compound 68

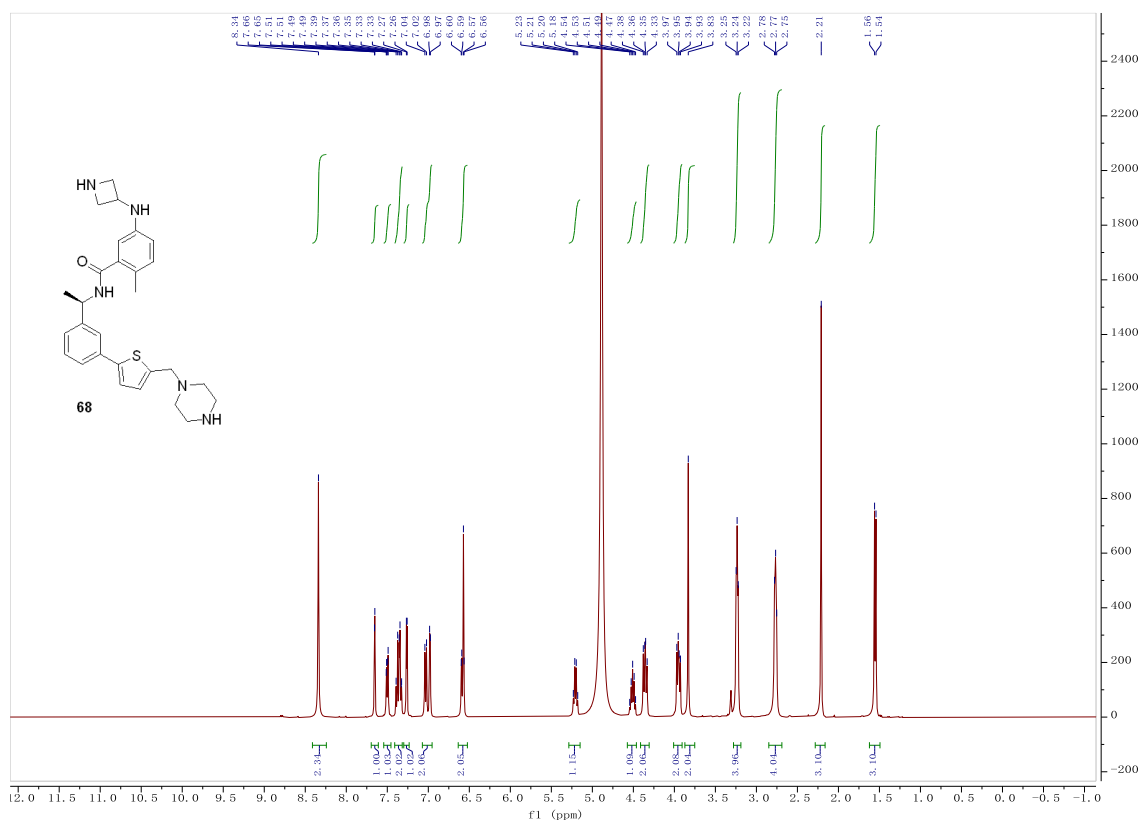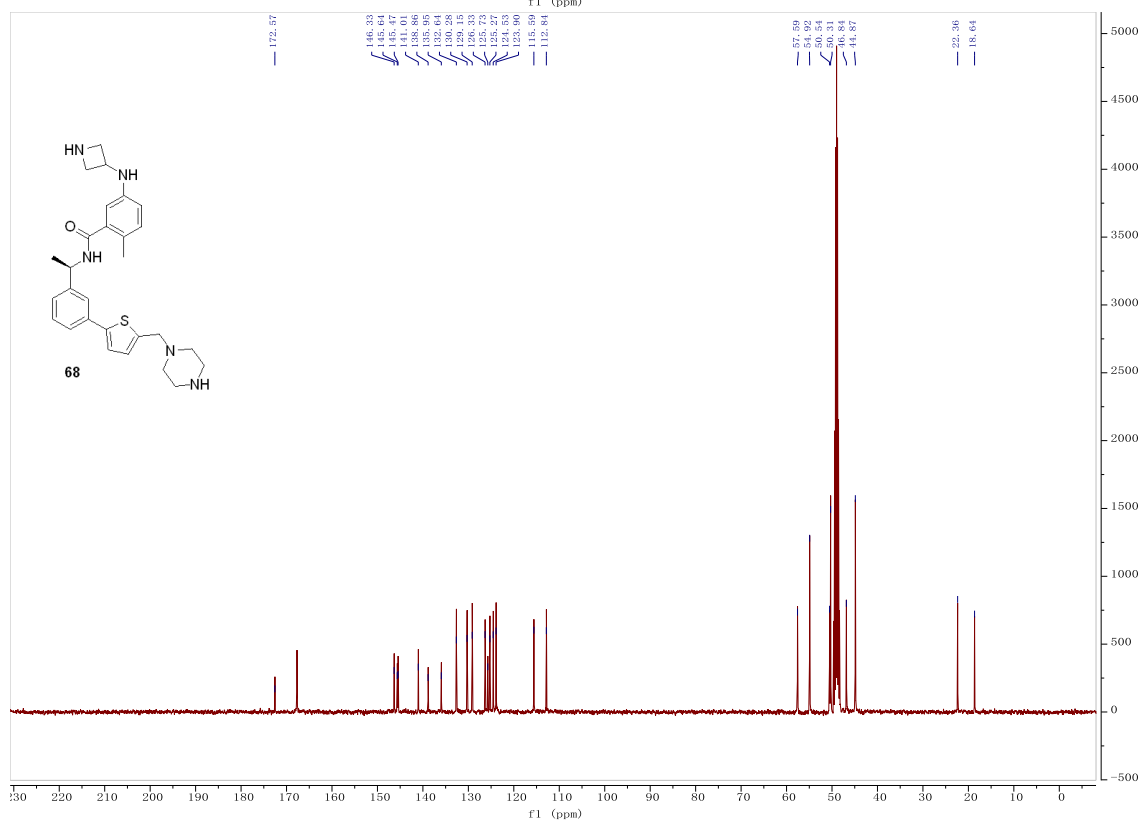

## Compound 69

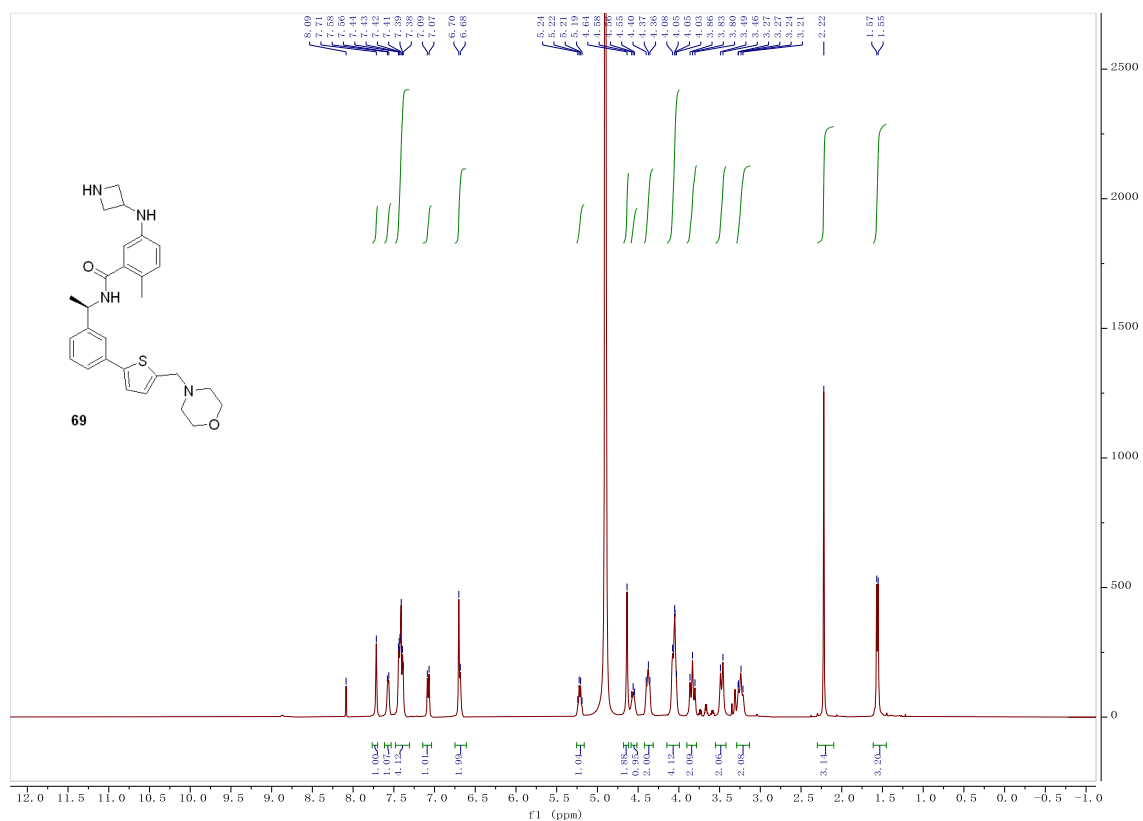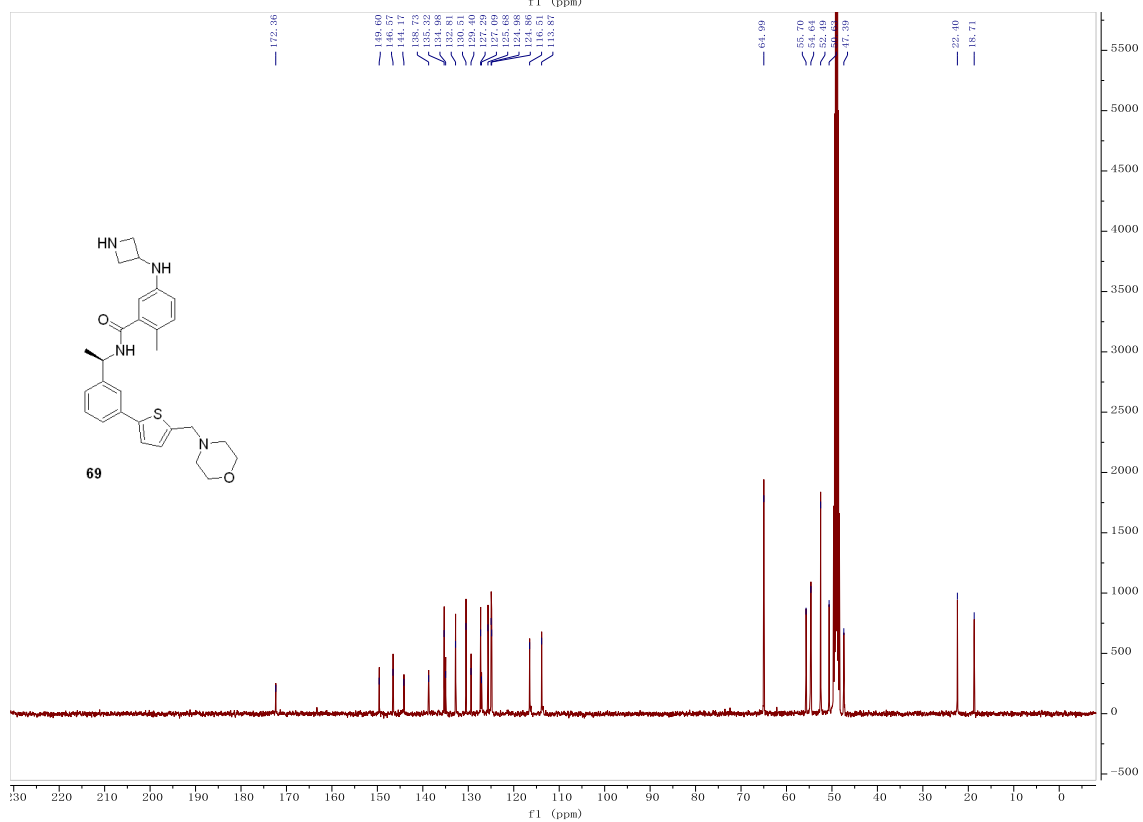

## Compound 70

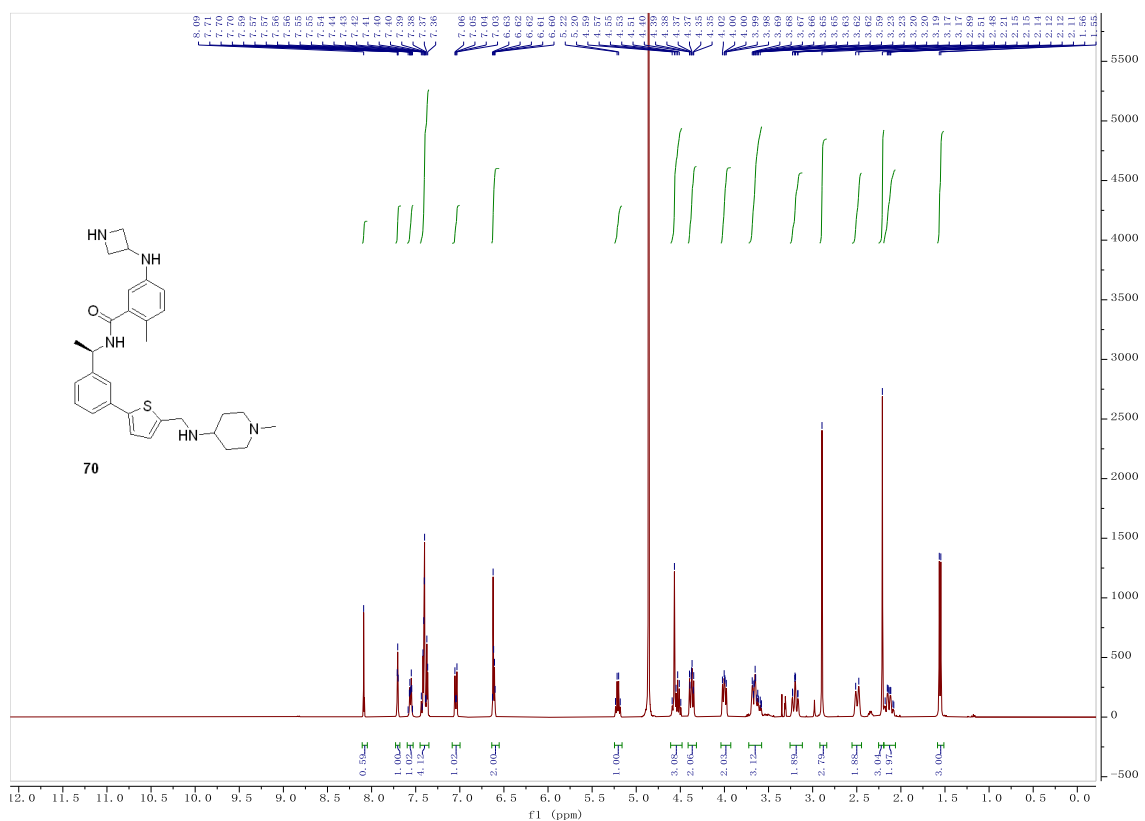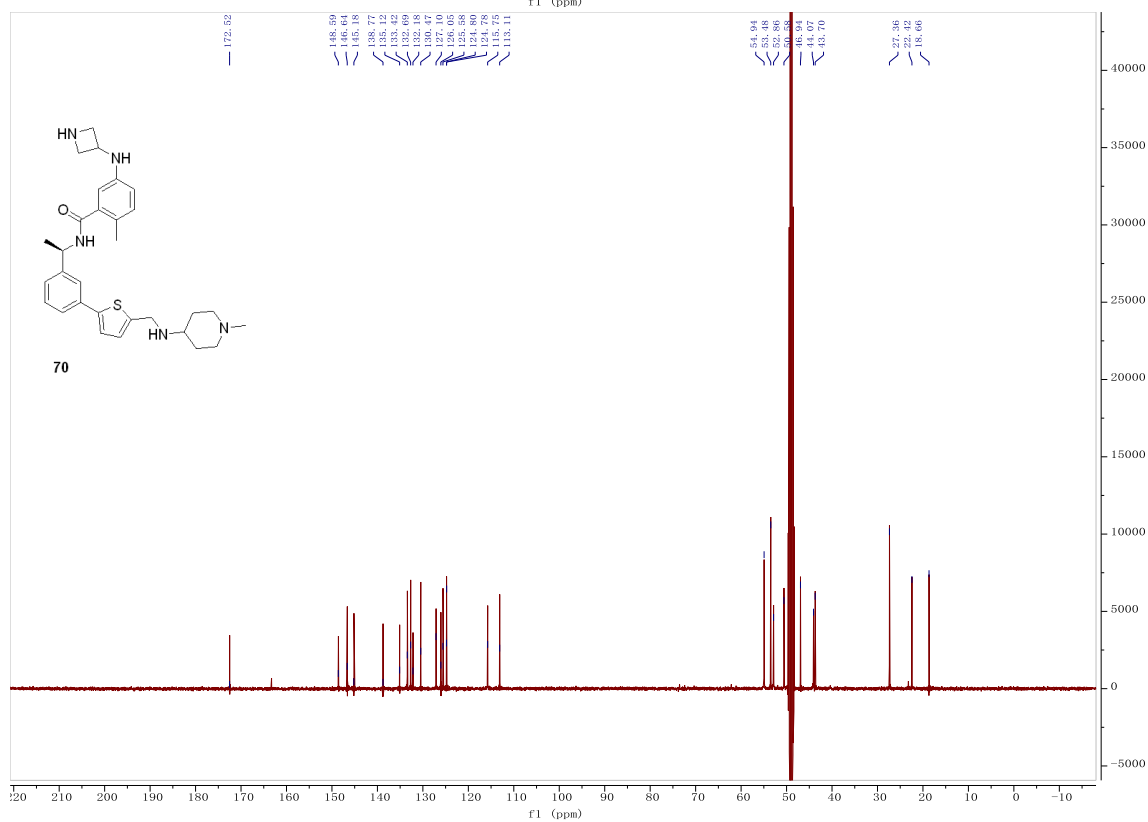

## Compound 71

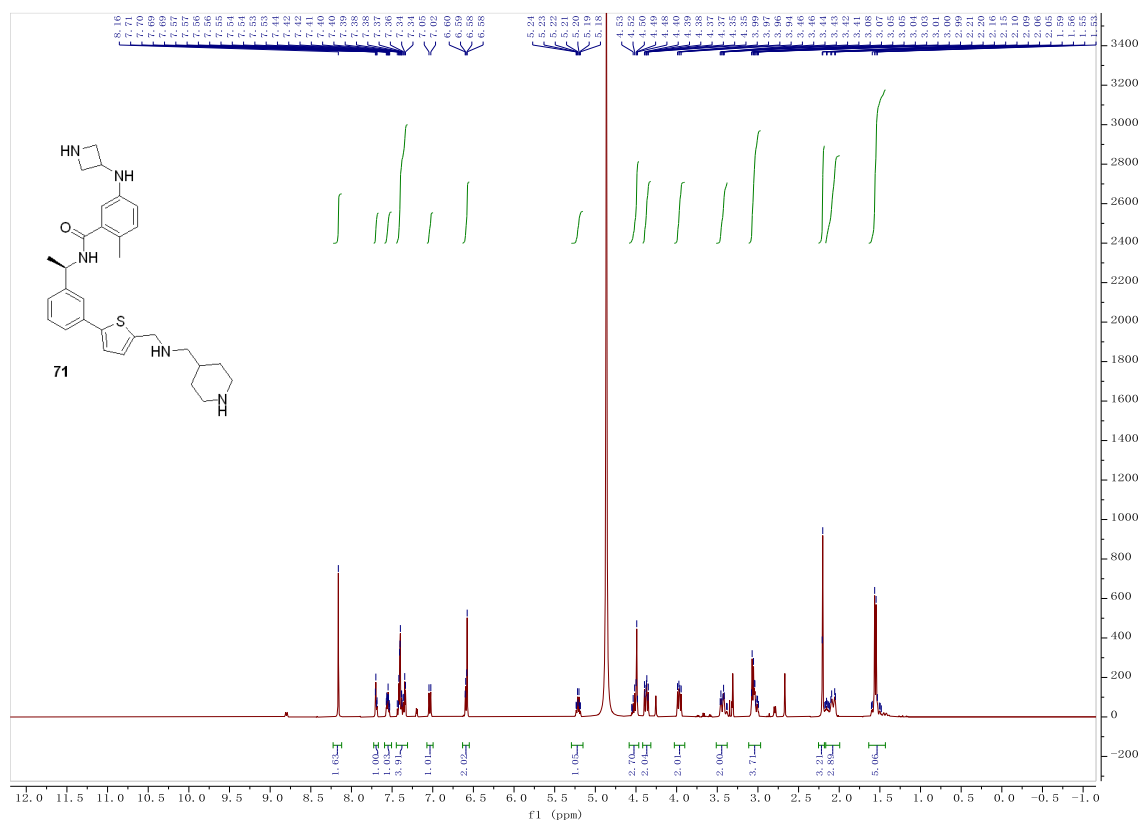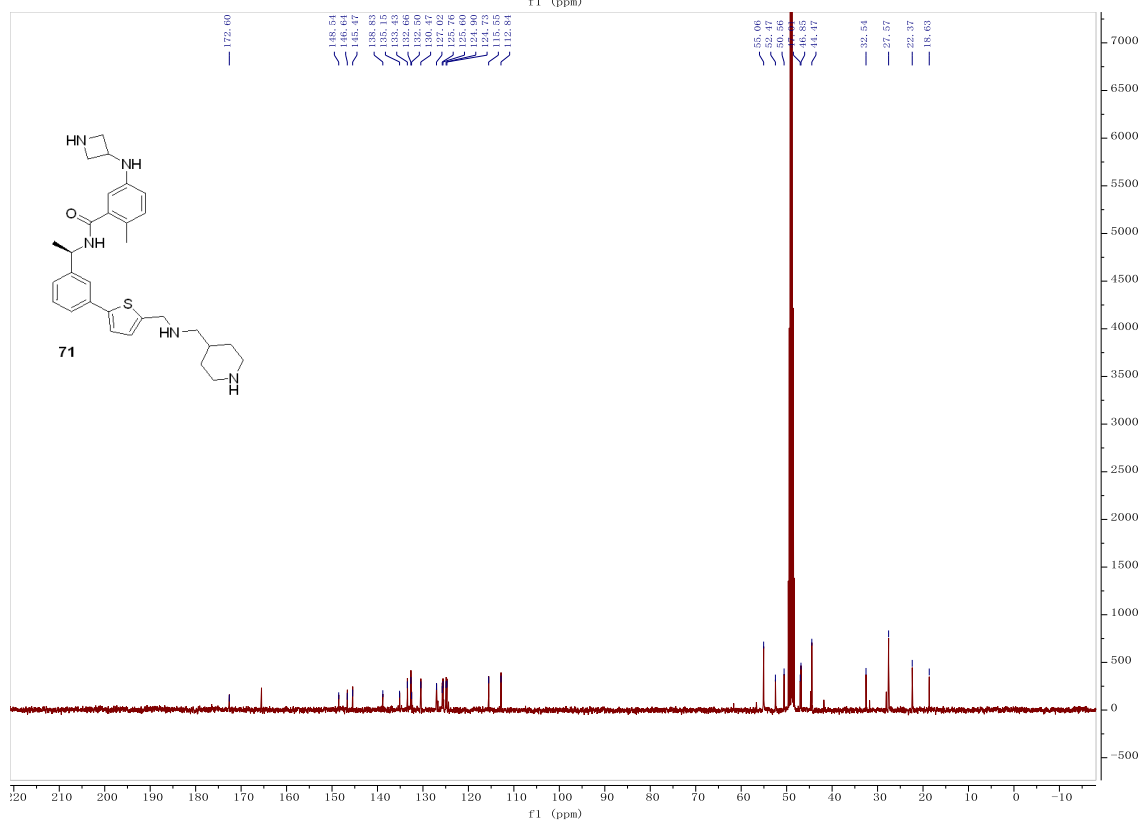

## Compound 72

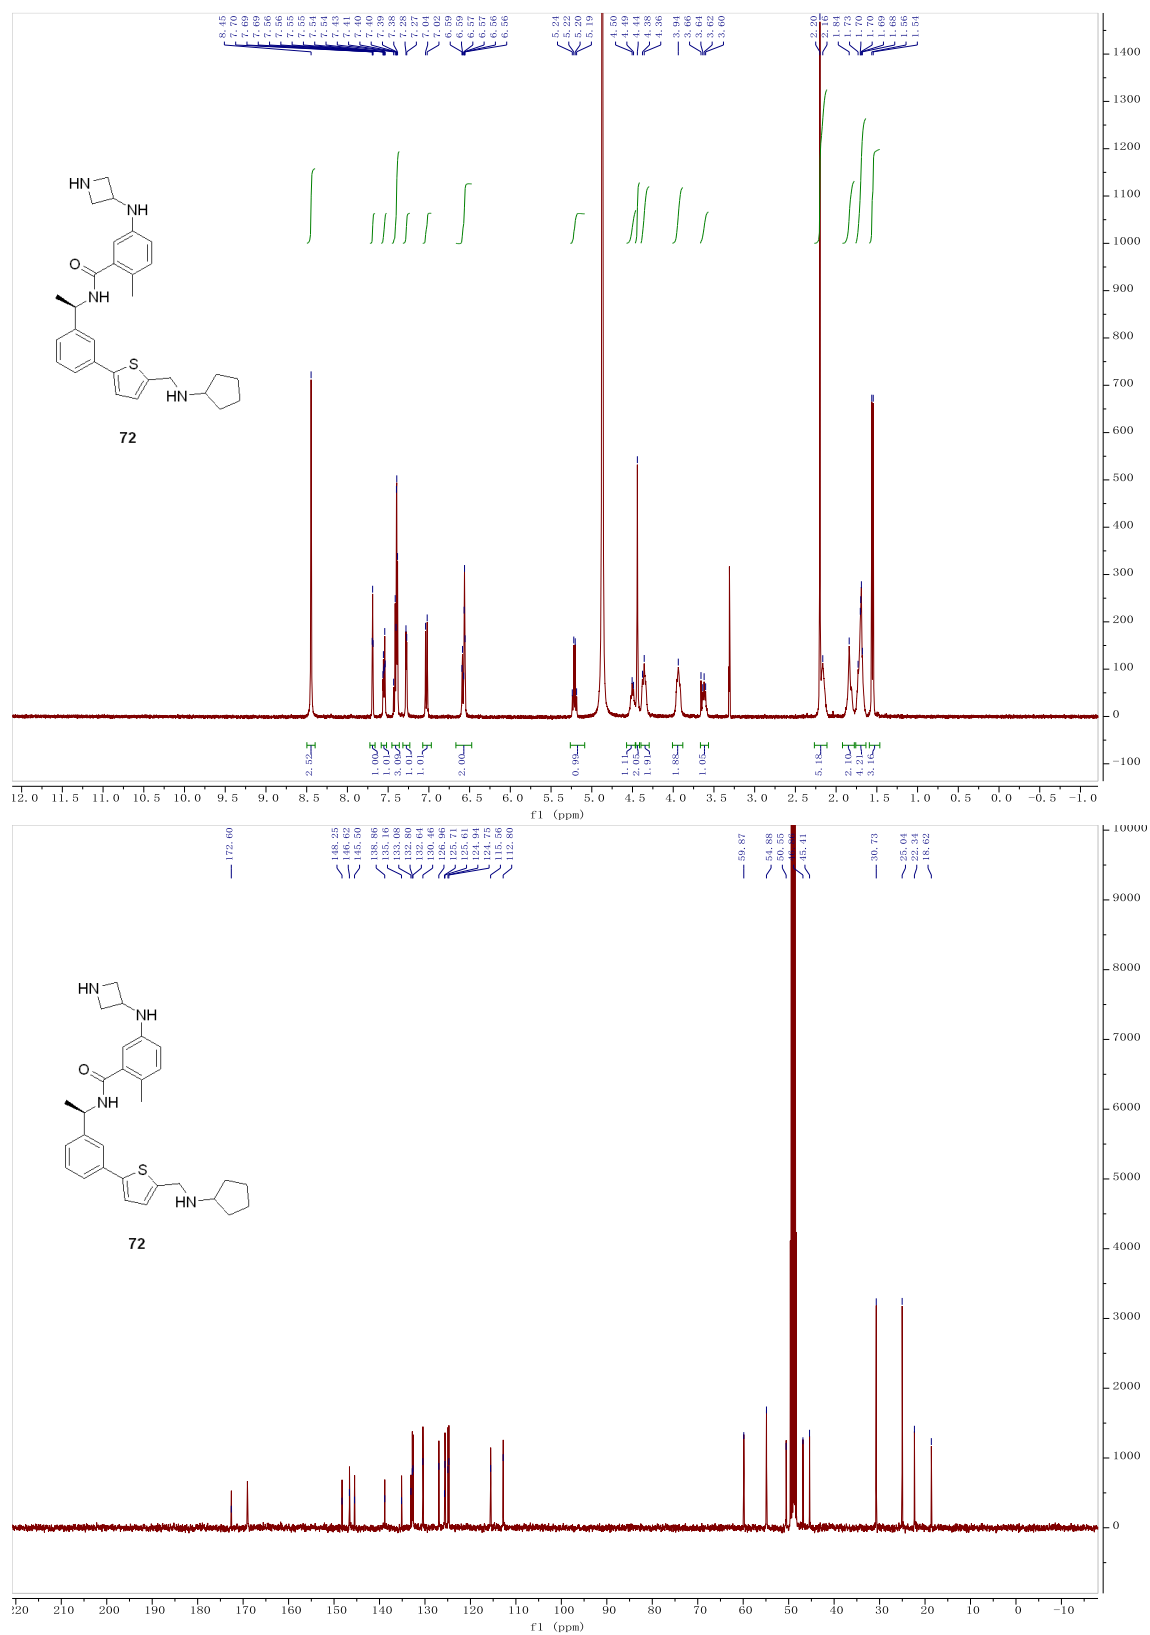



## Compound 74

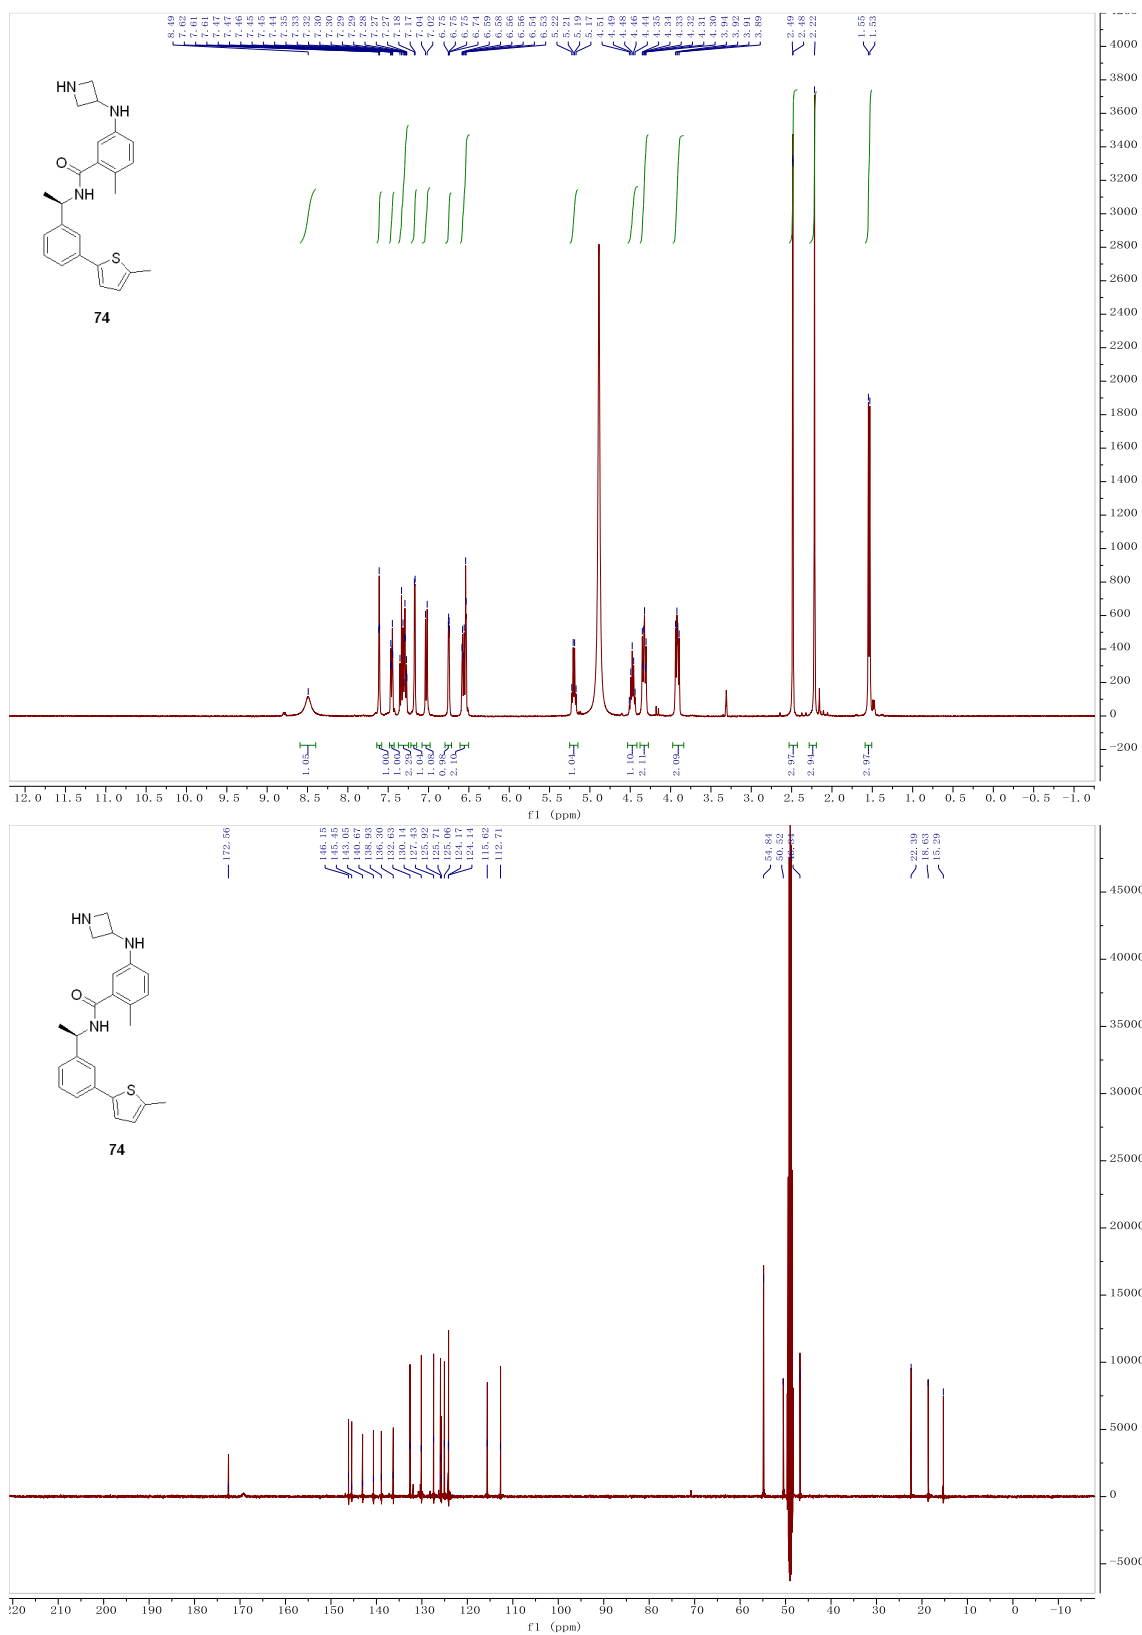

## Compound 75

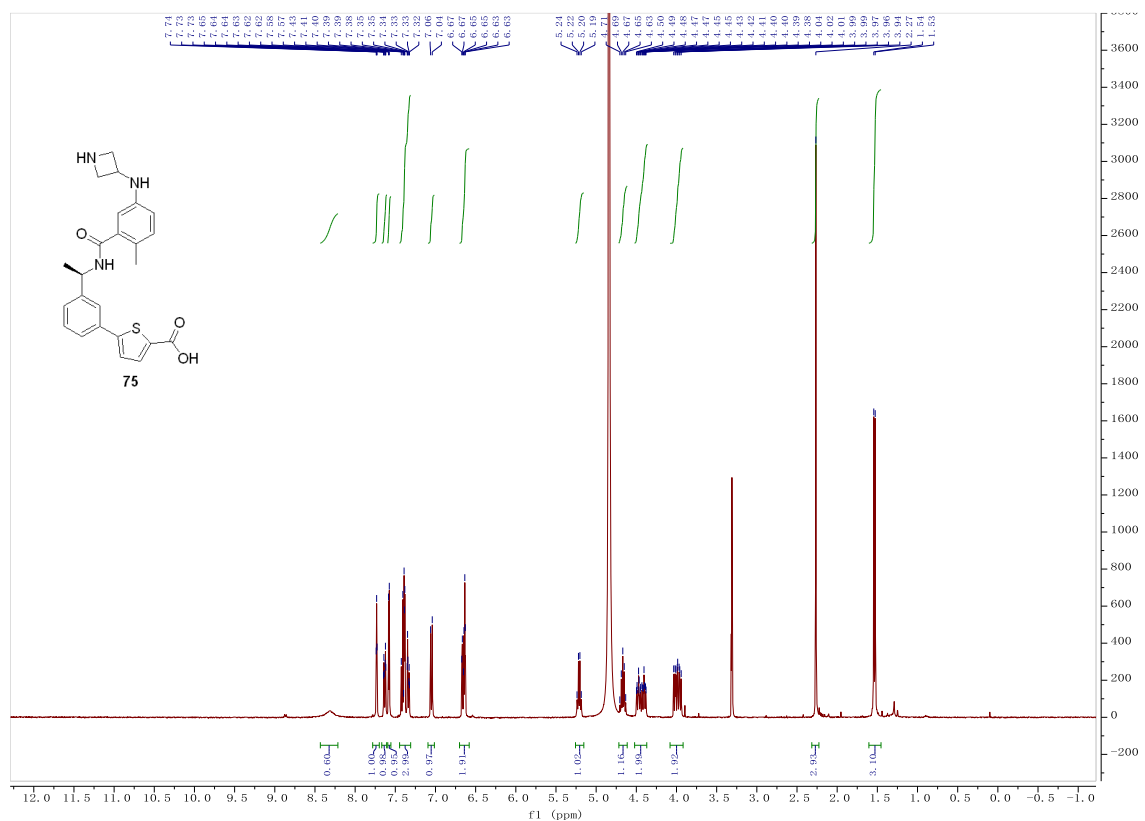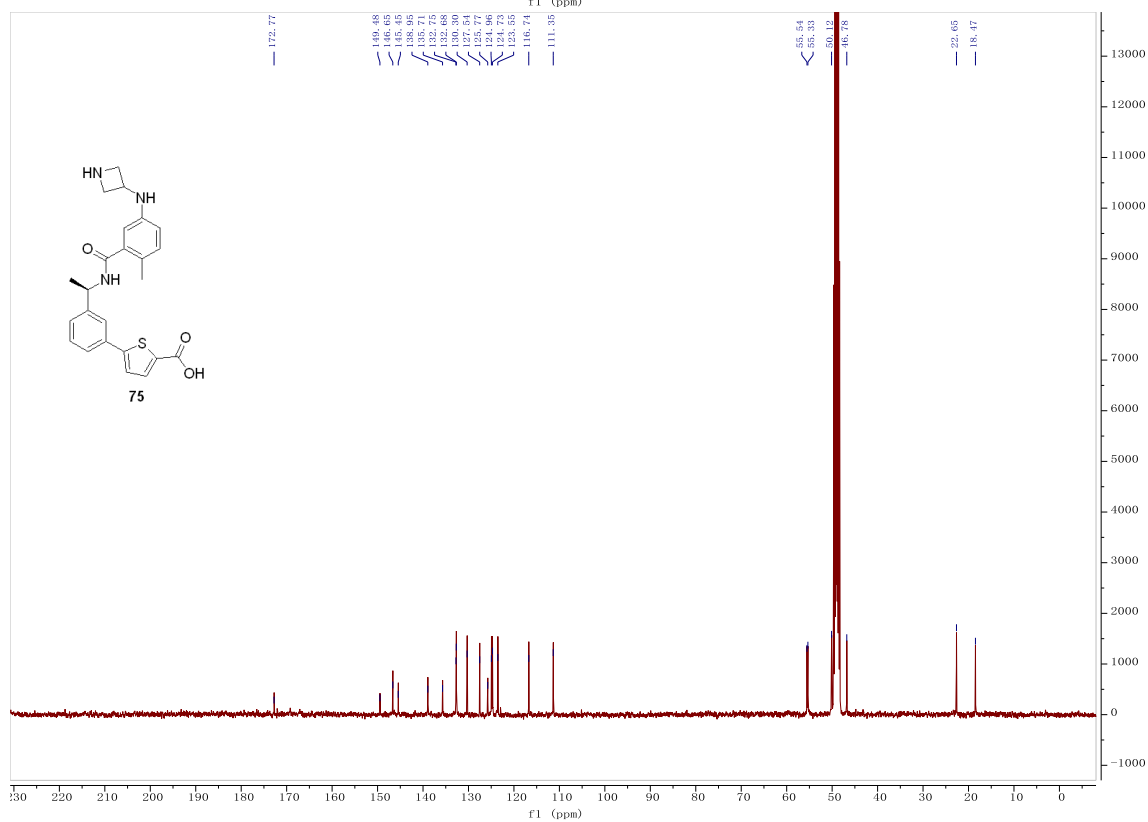







## Compound 79

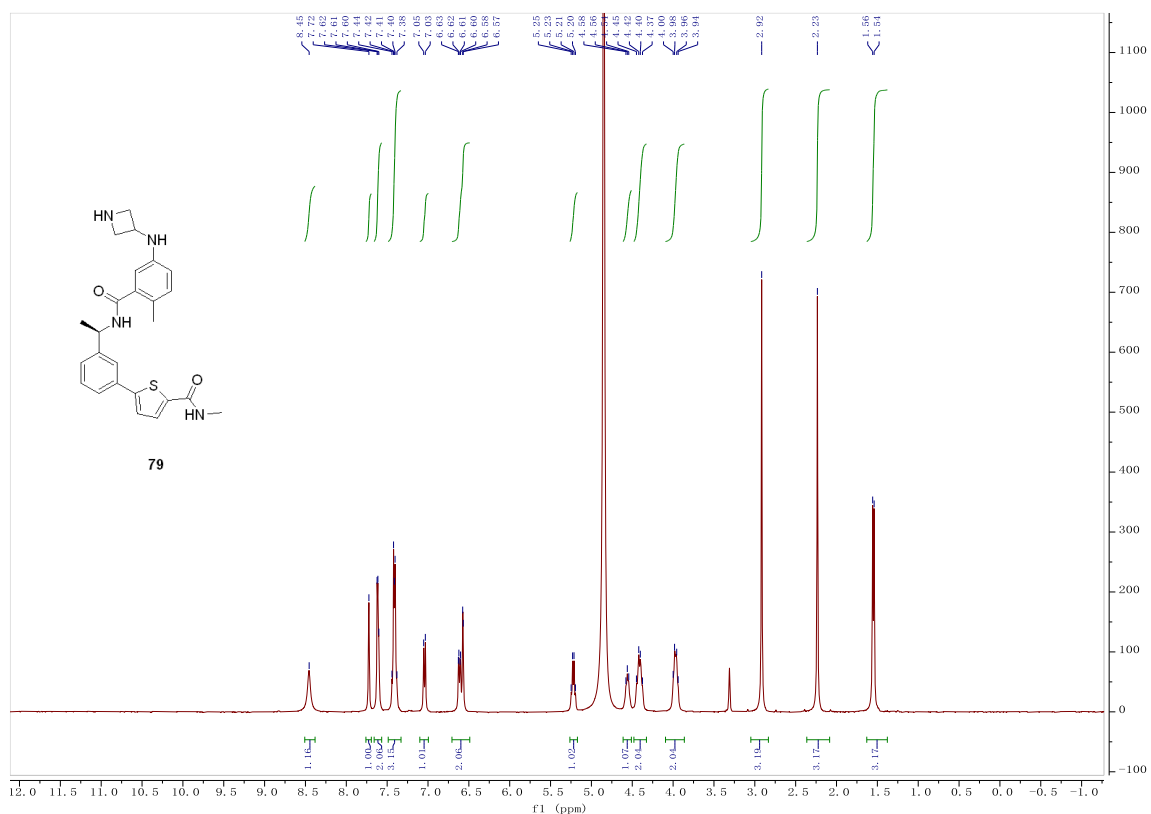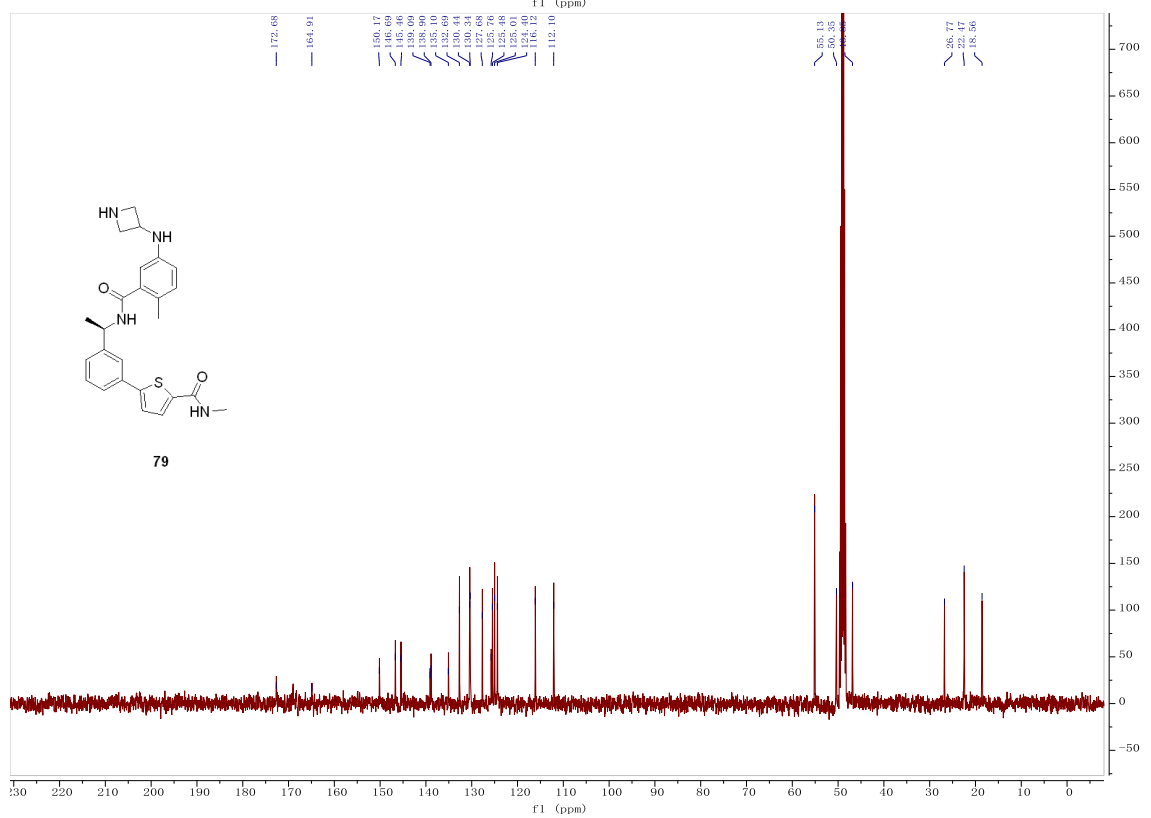

## Compound 80

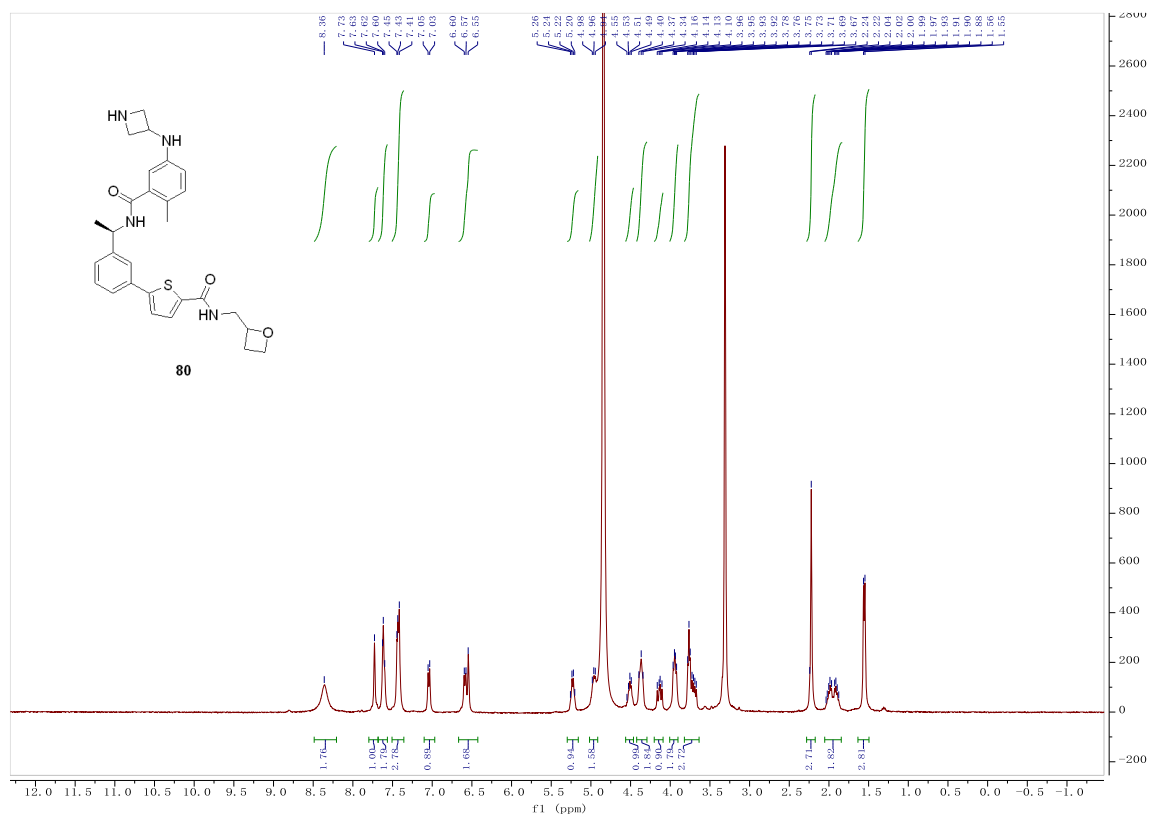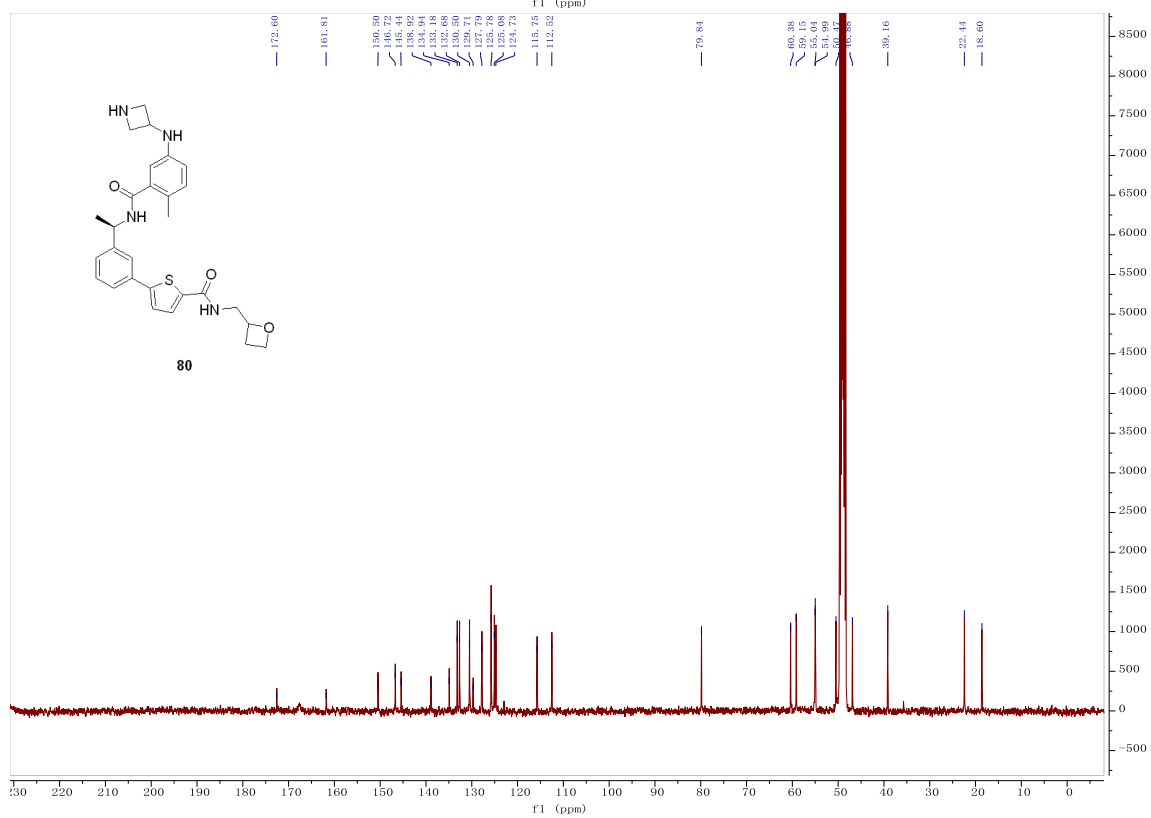

## Compound 81

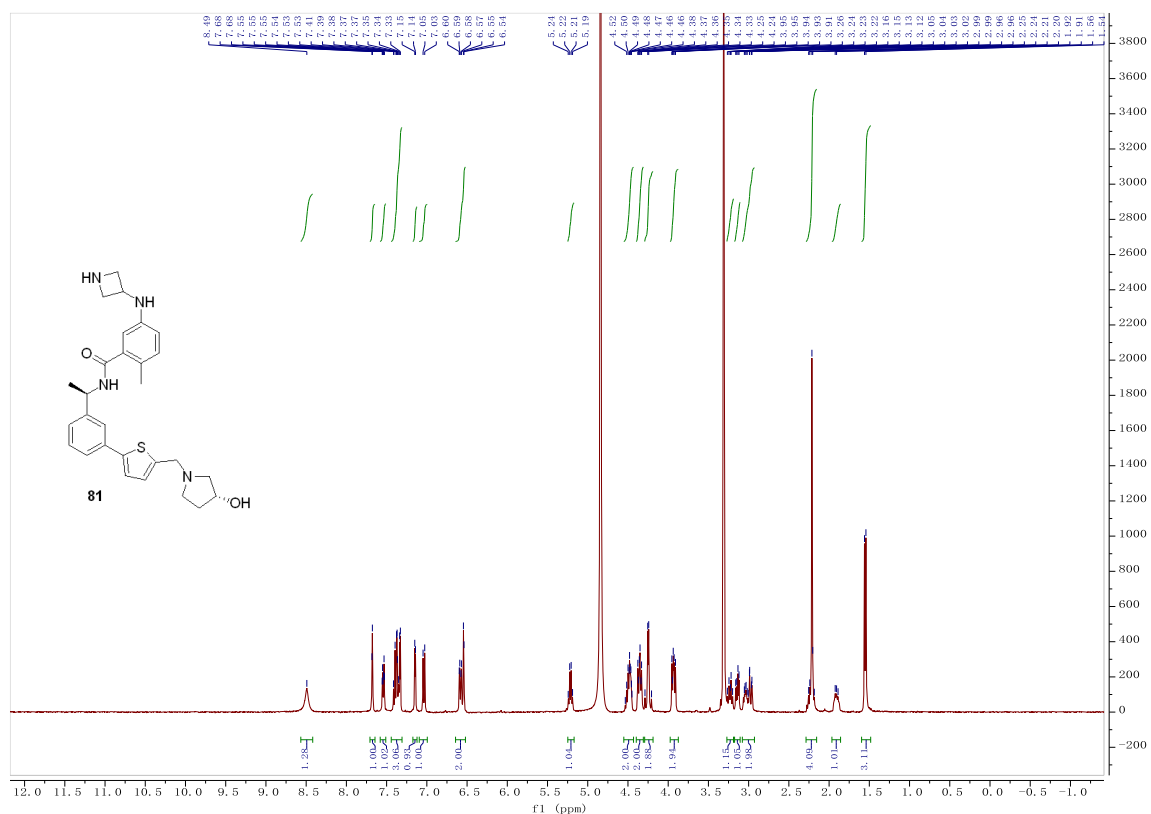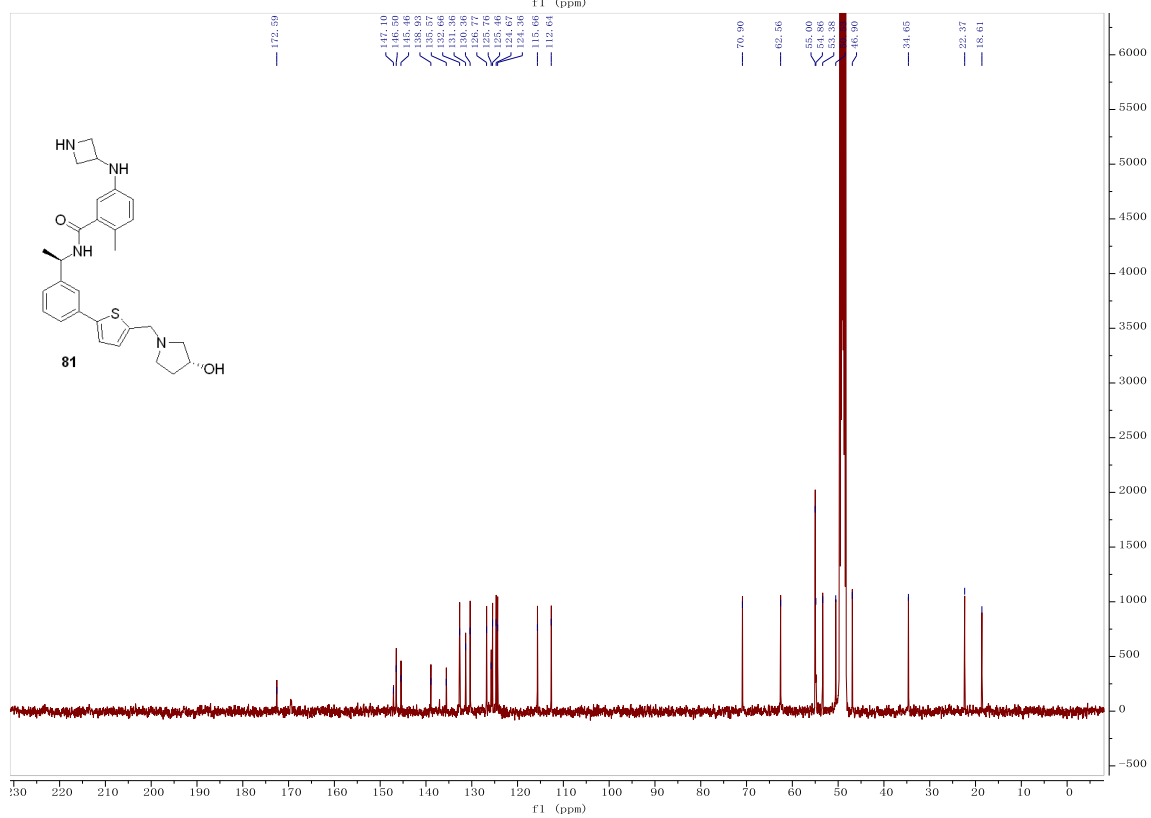

## Compound 83

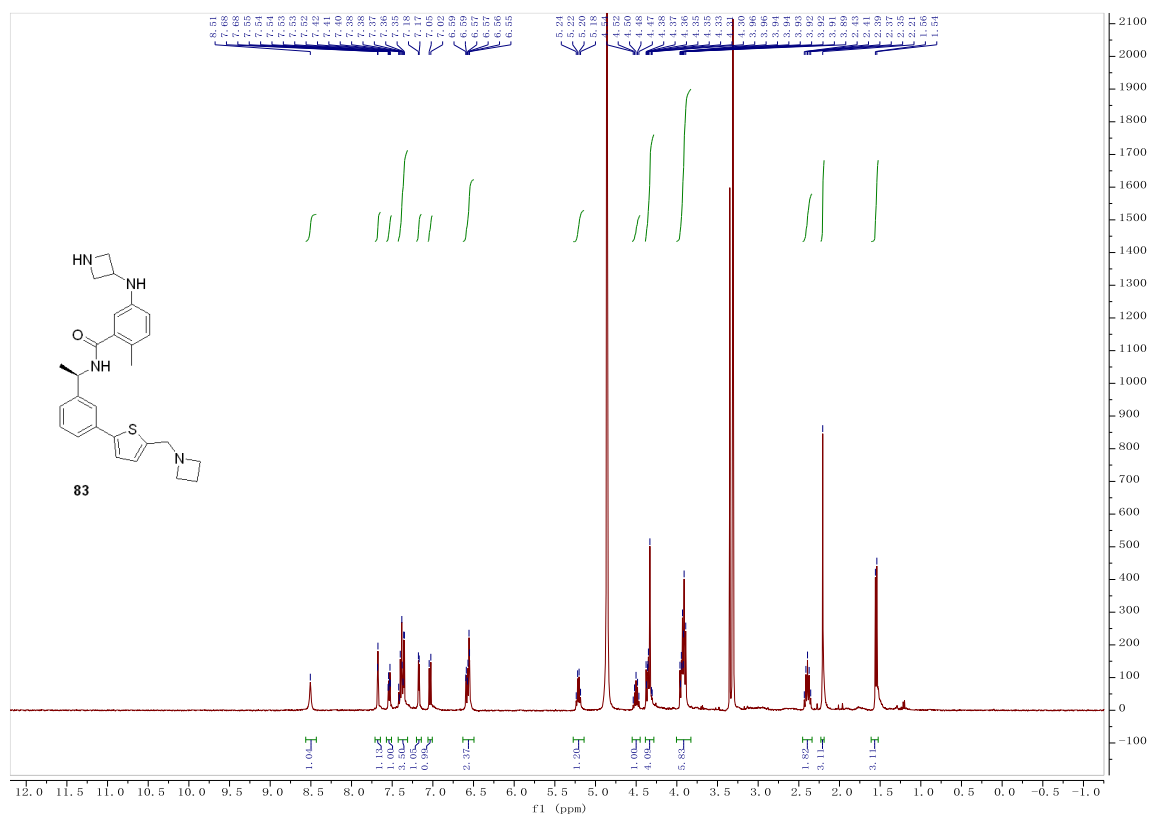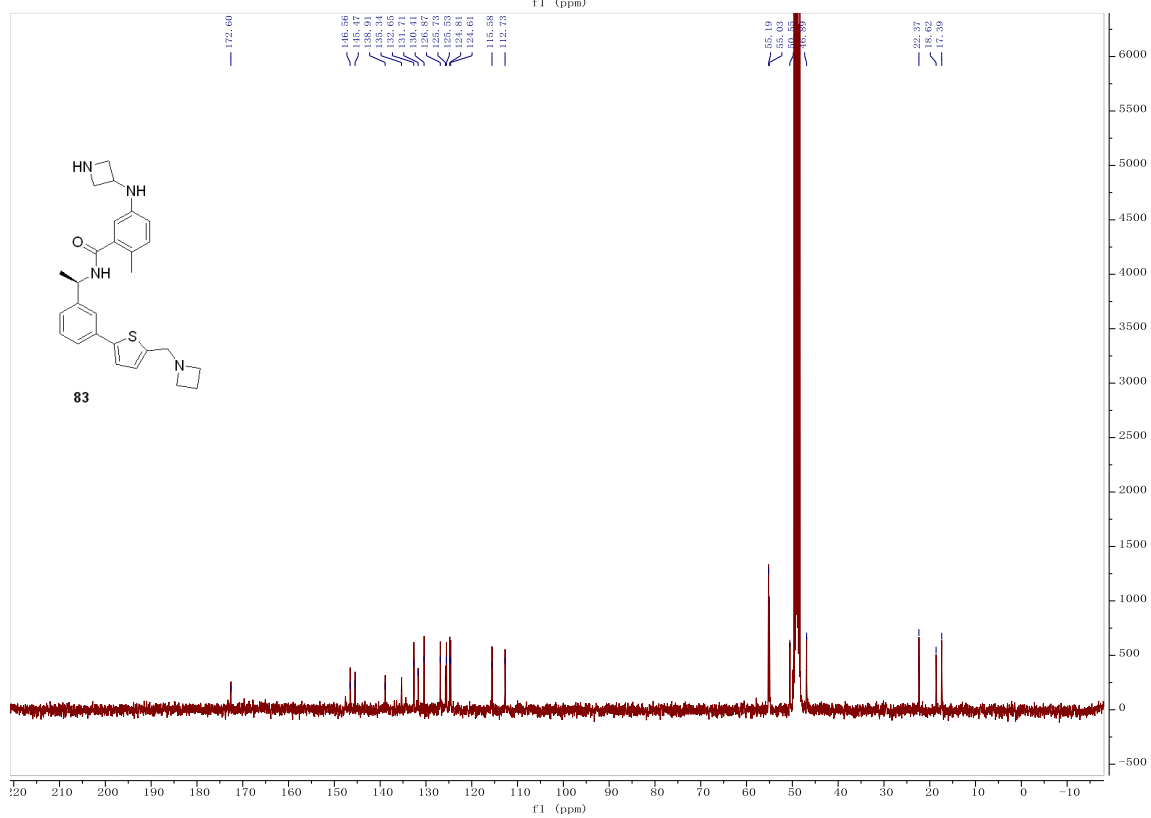



## Compound 85

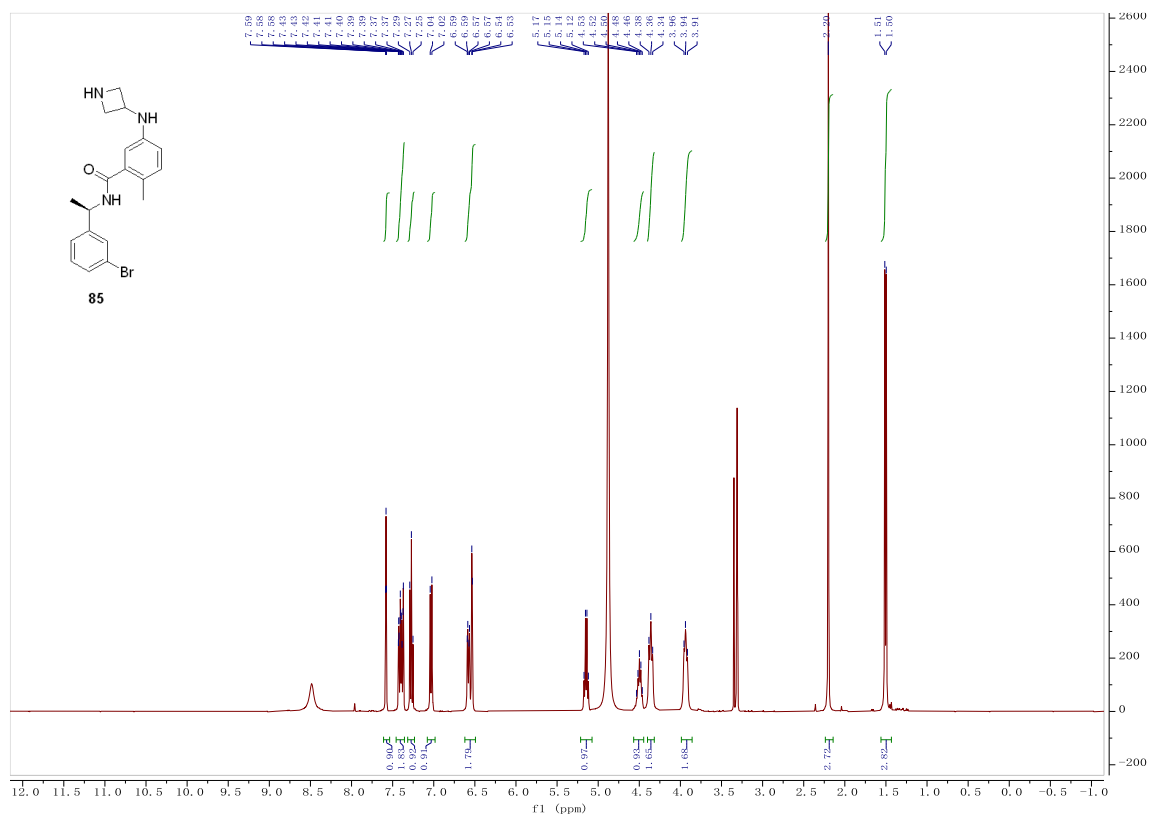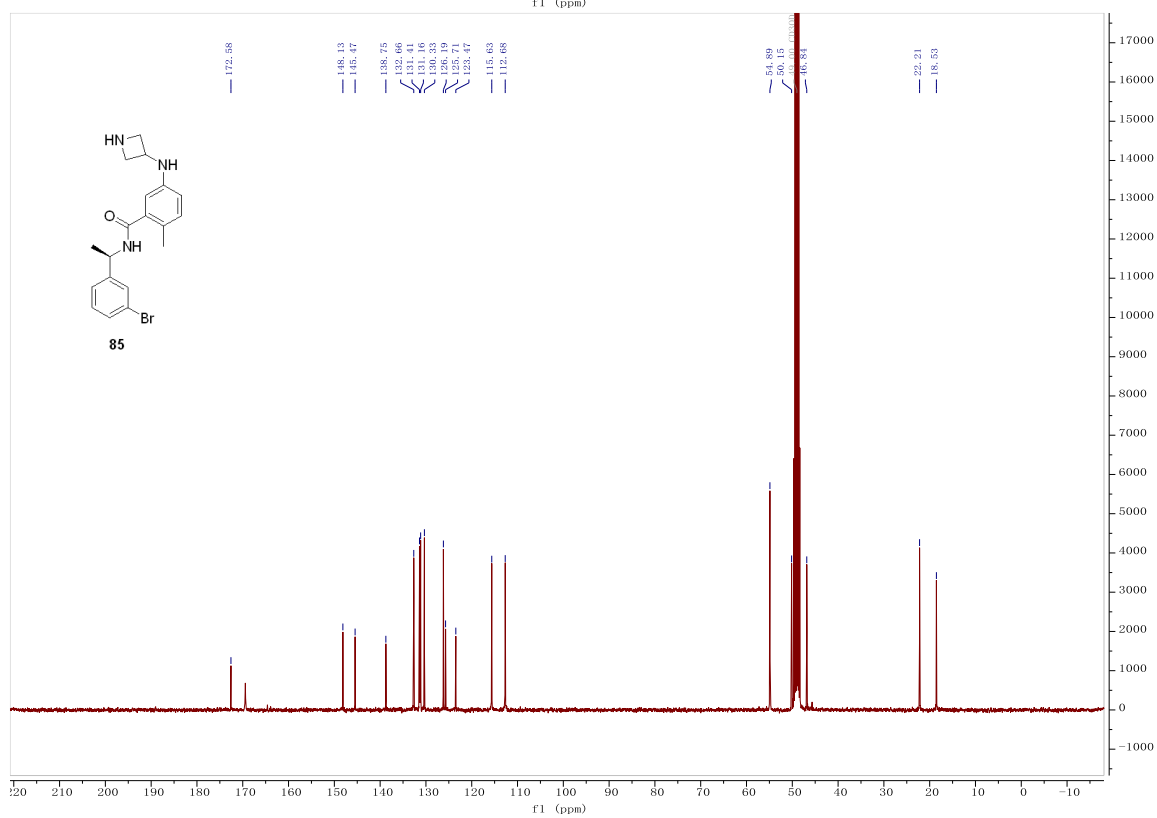



## Compound 86

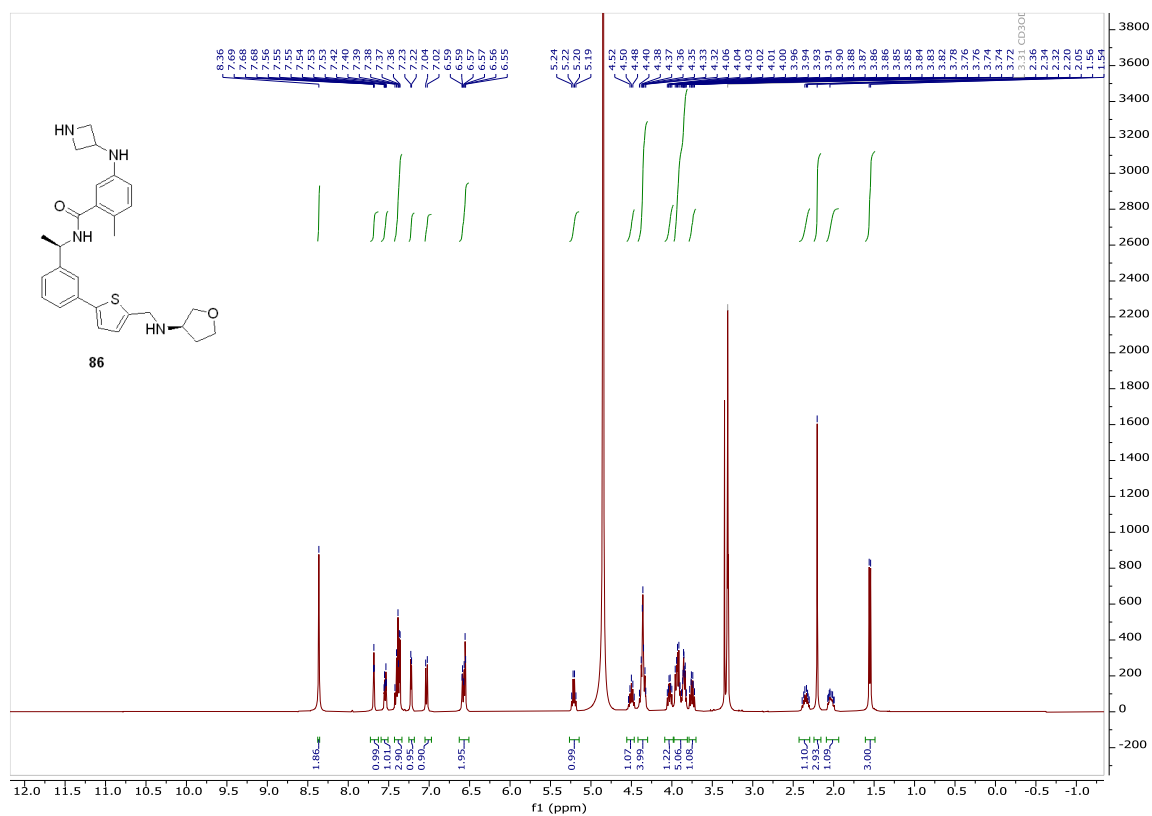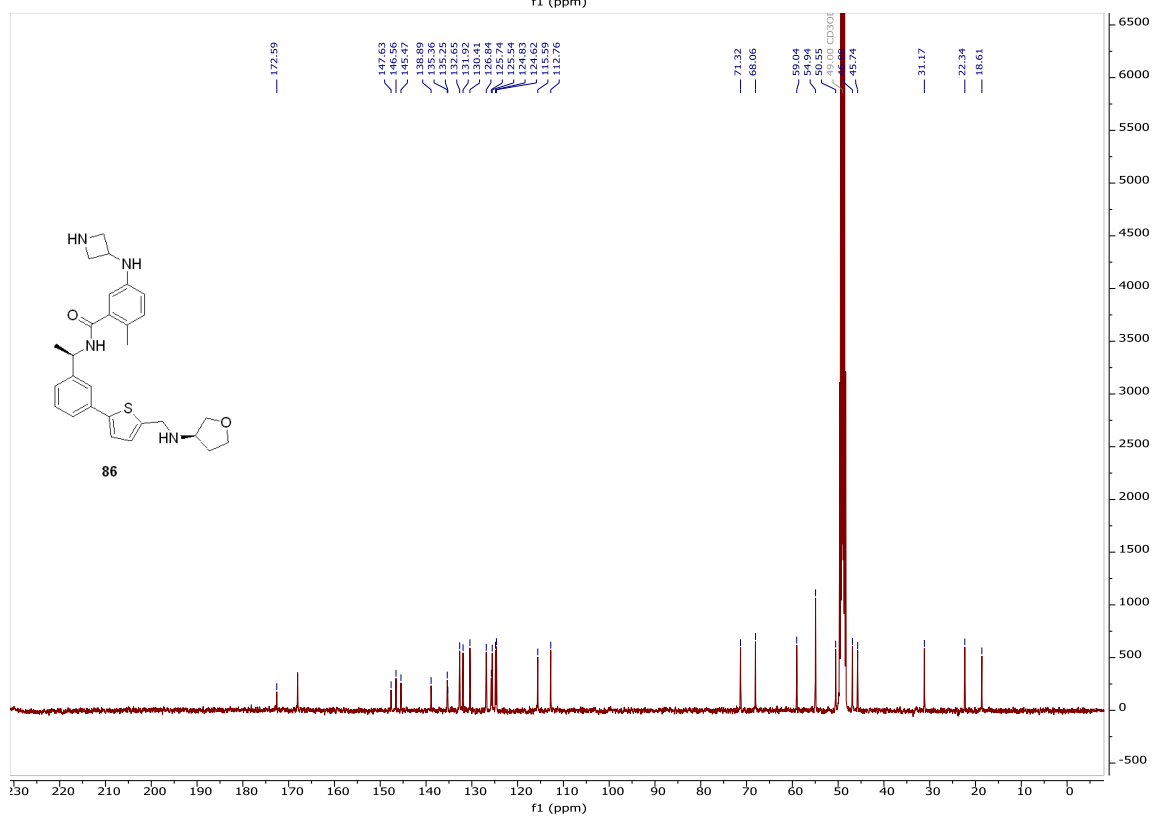

## Compound 87

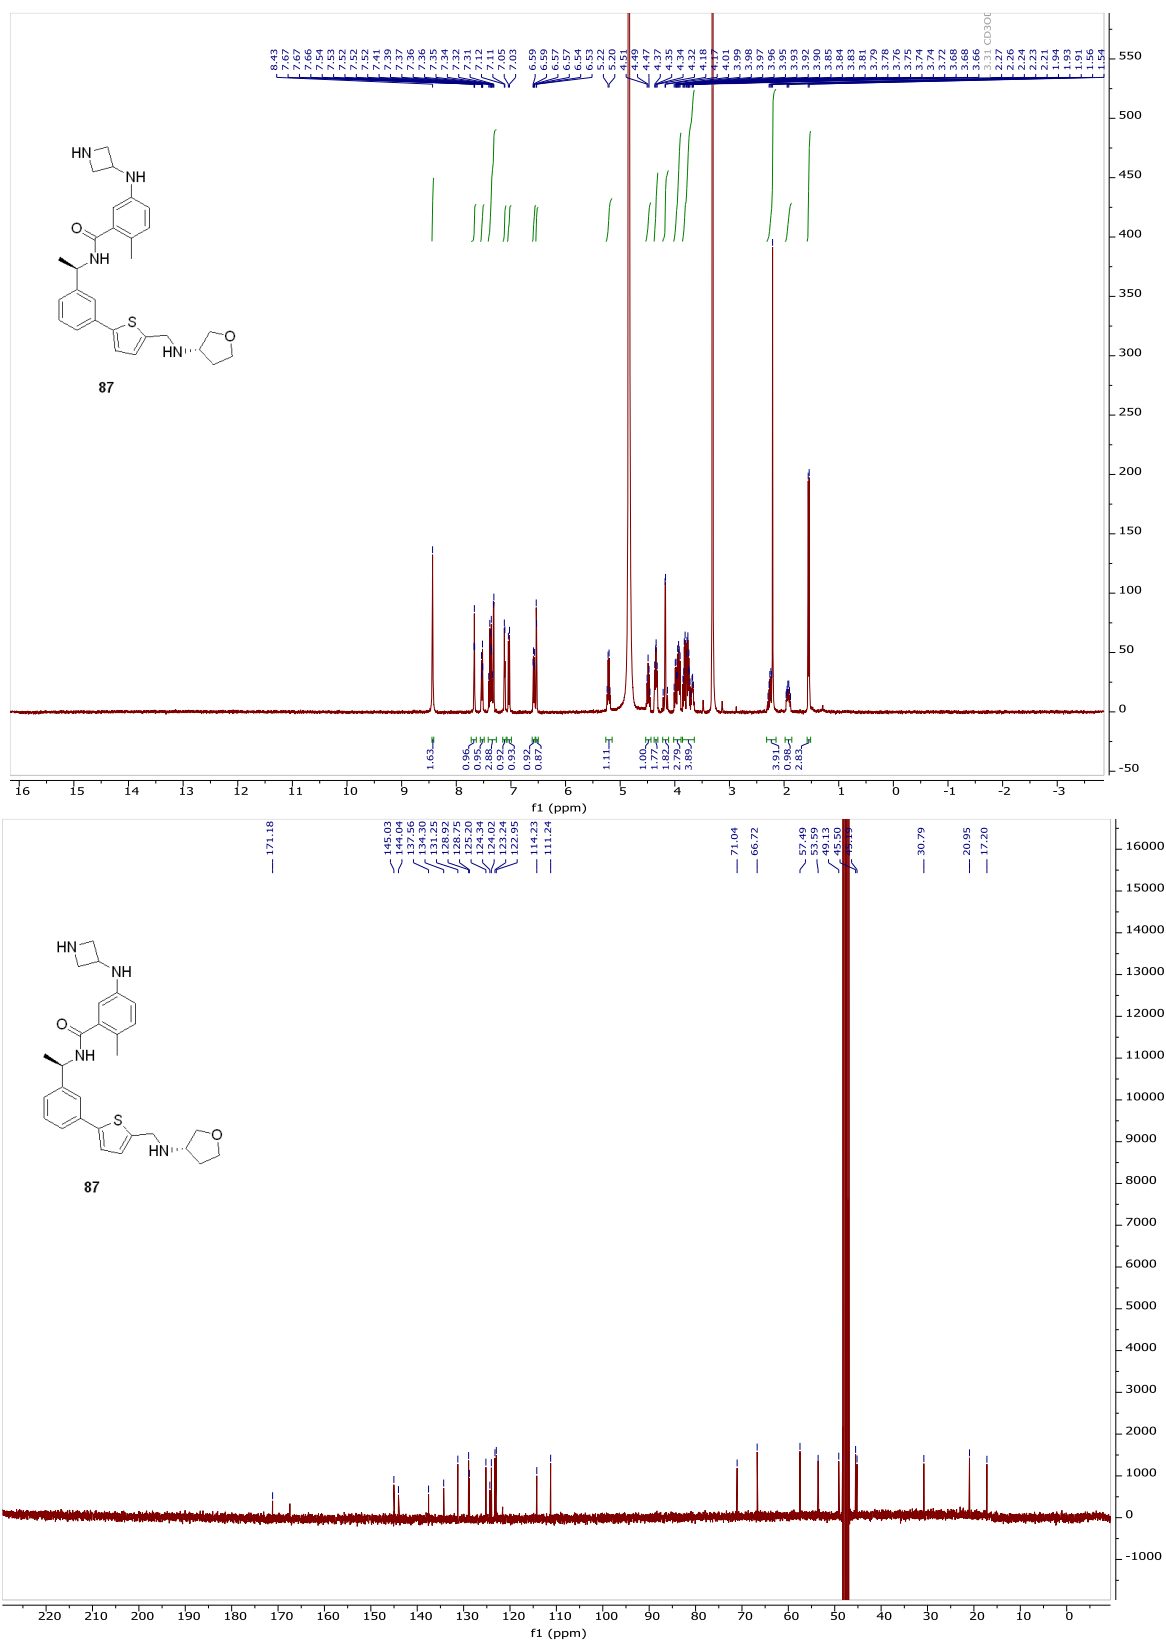

## Compound 88

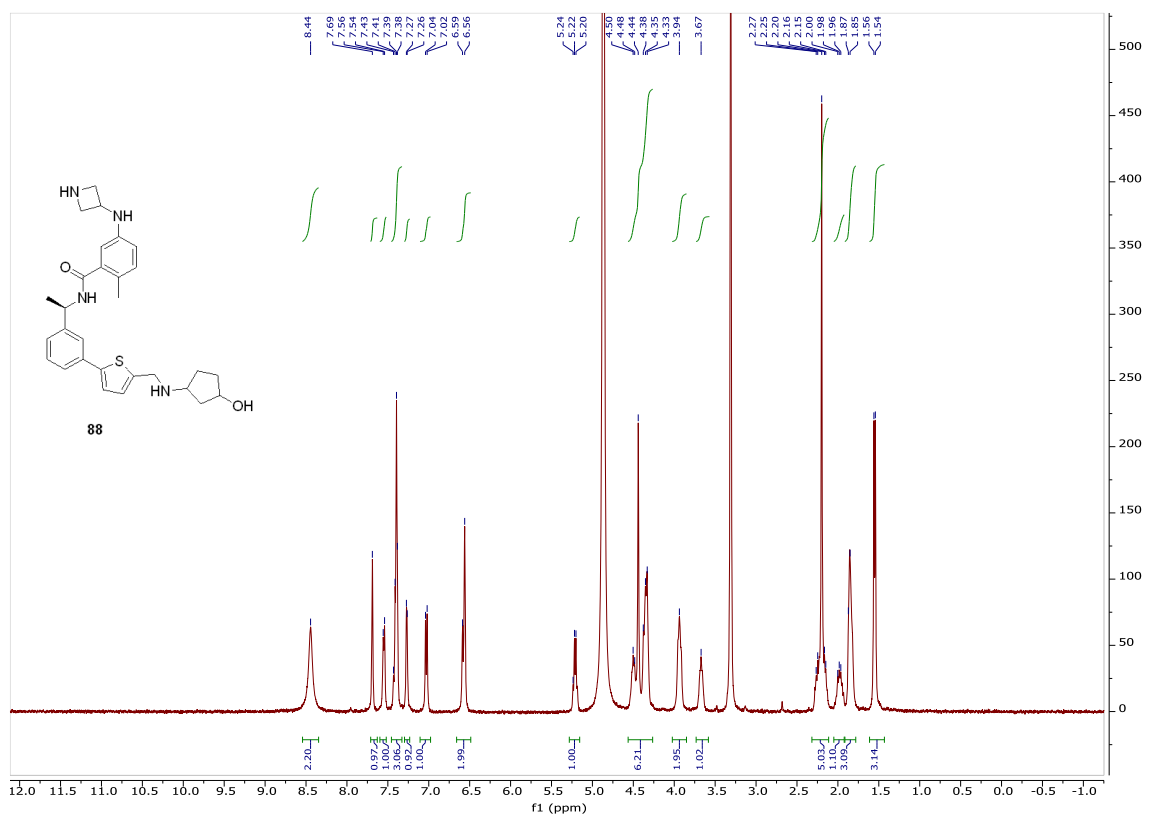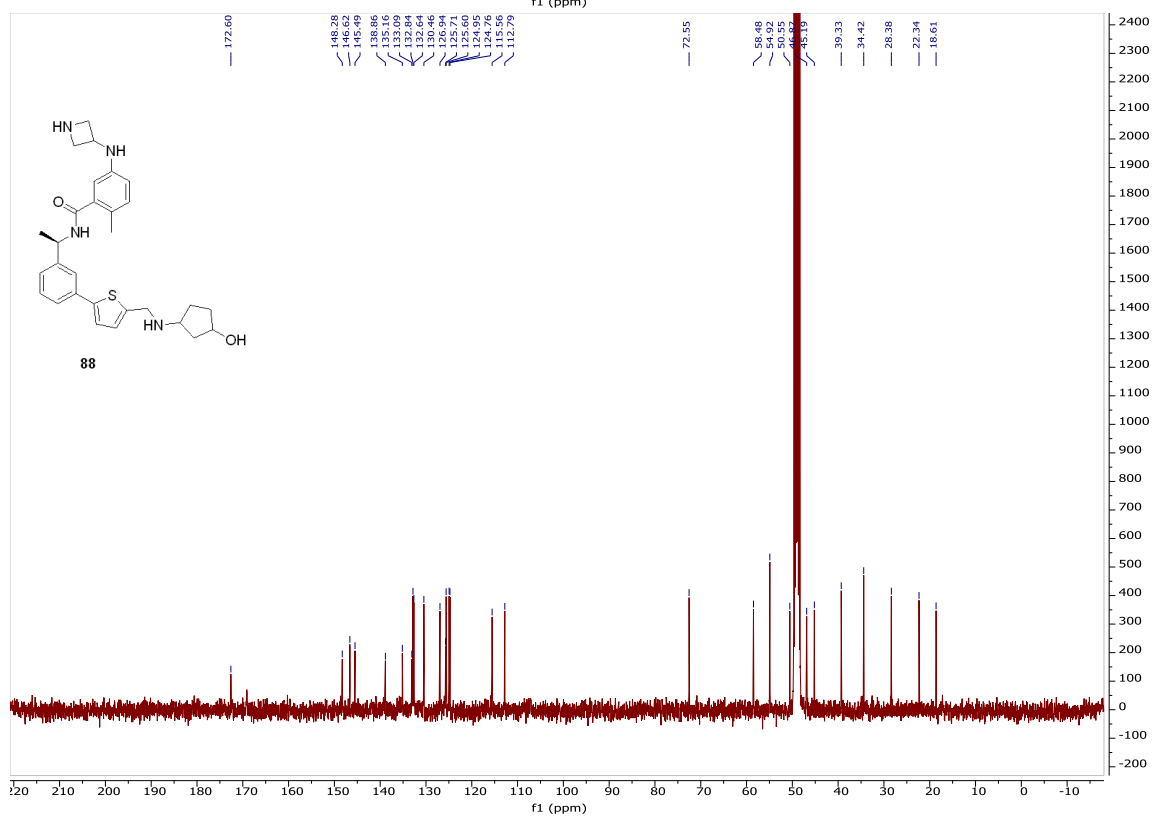

## Compound 89

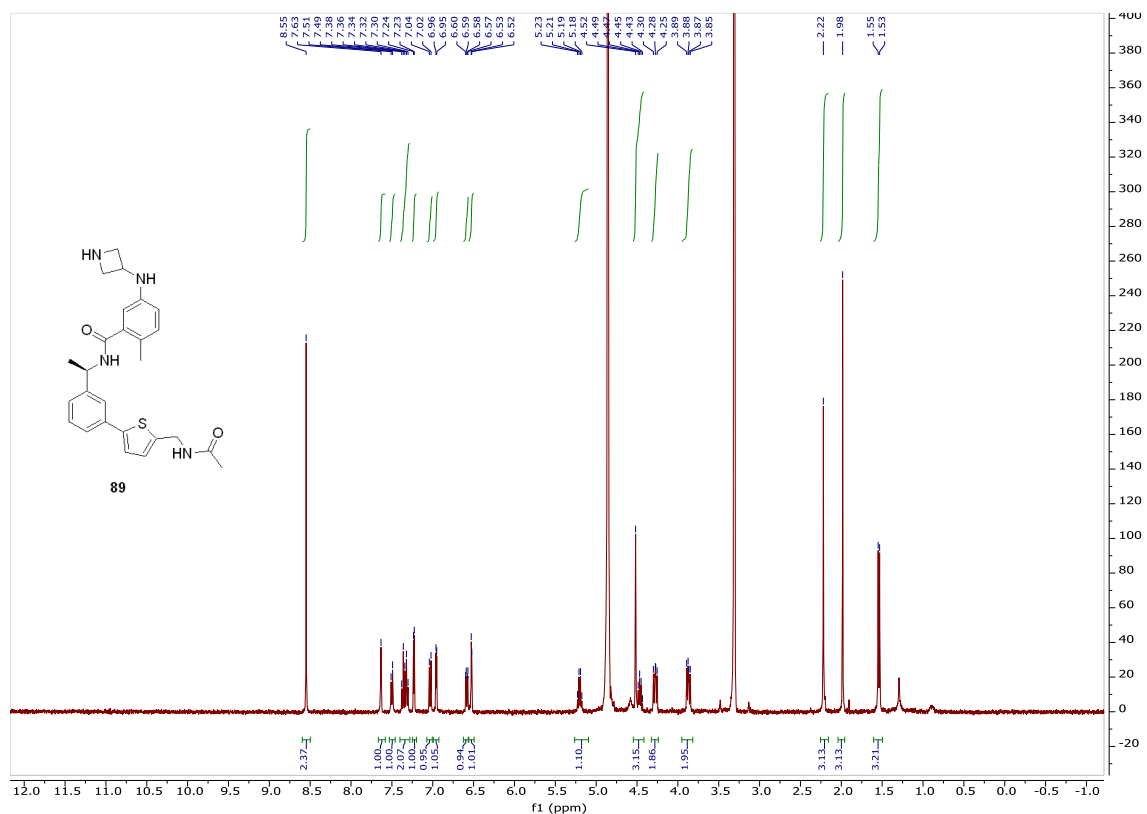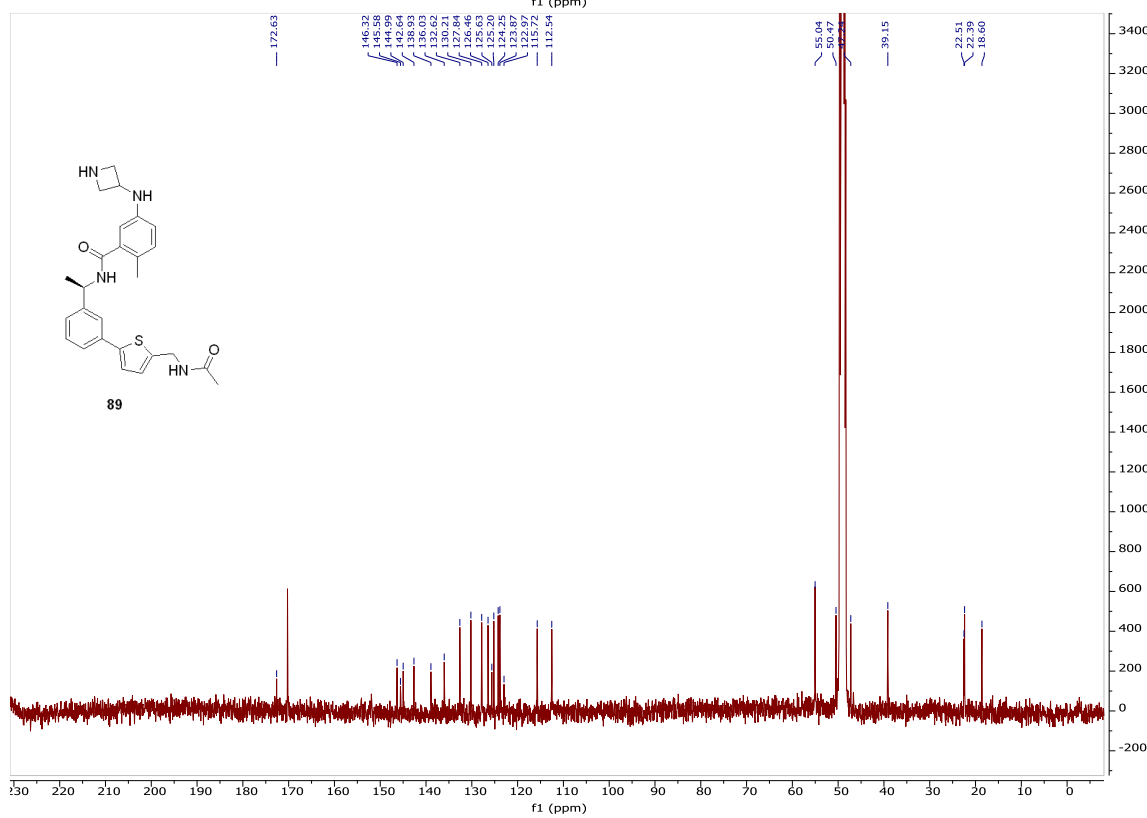

## Compound 90

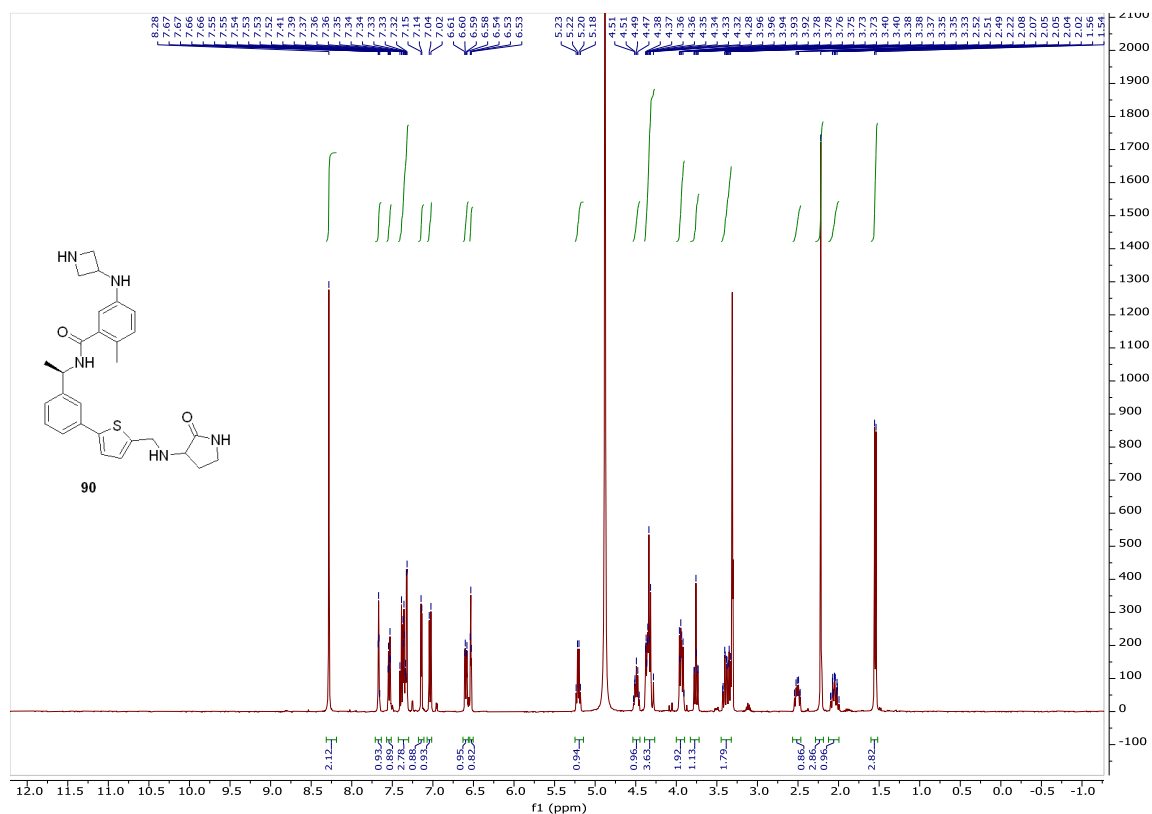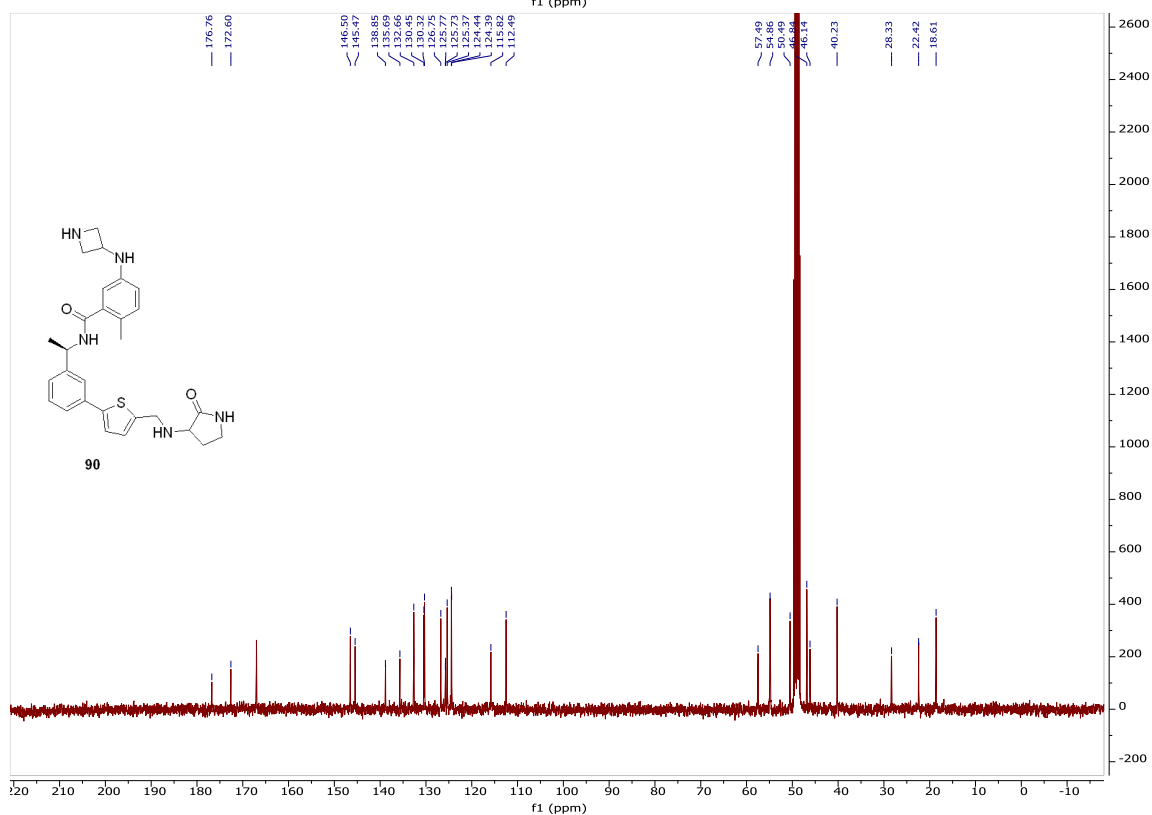

## Compound 92

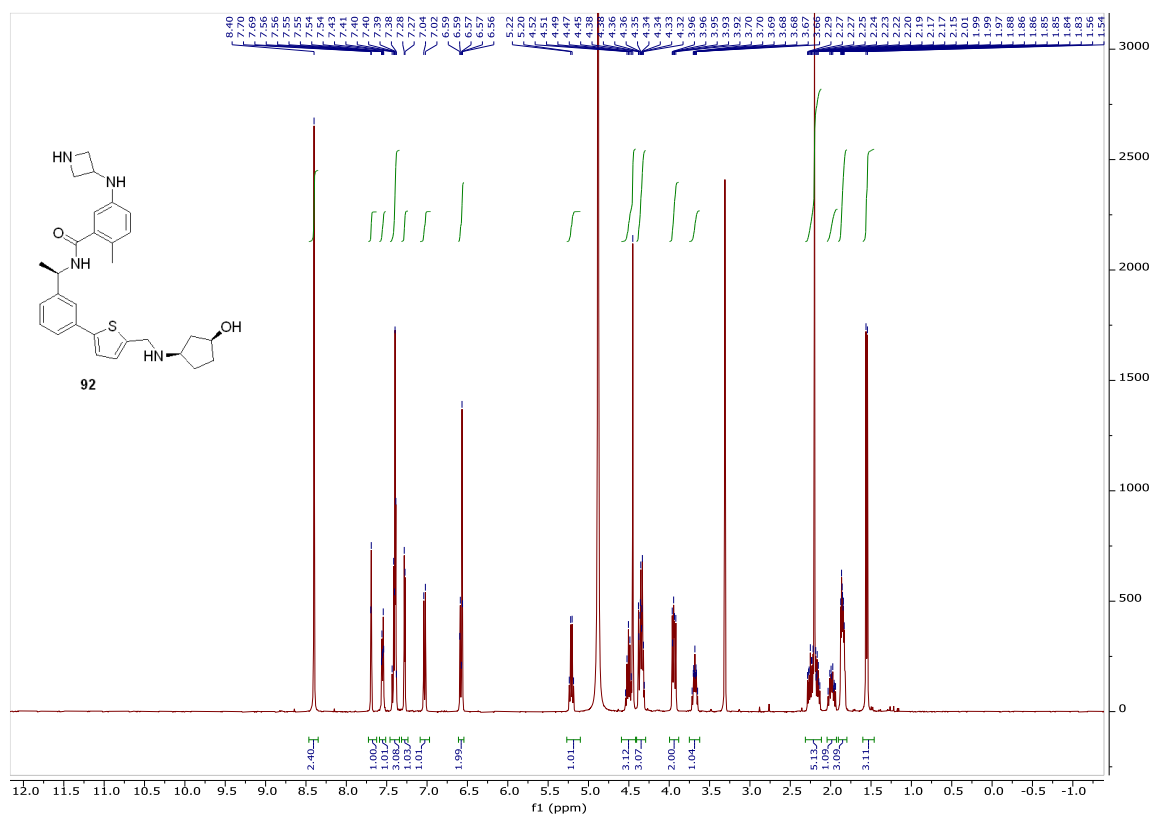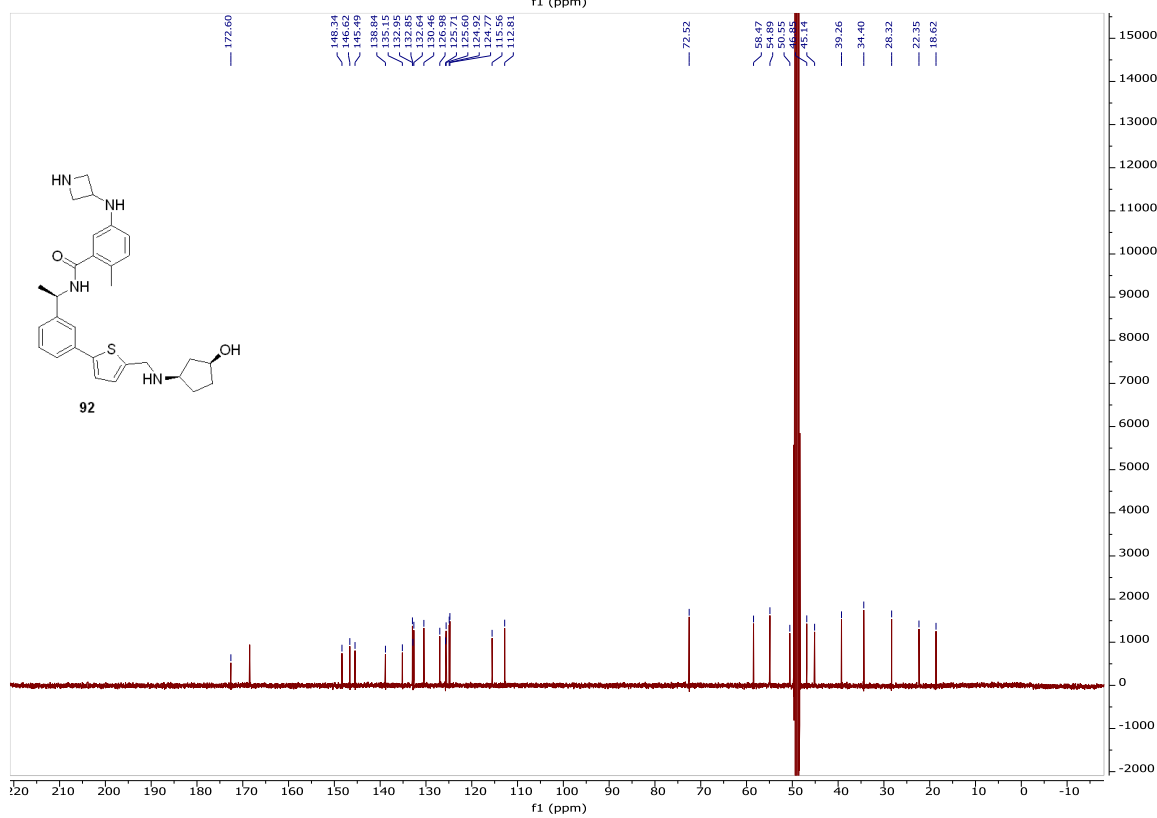

## Compound 93

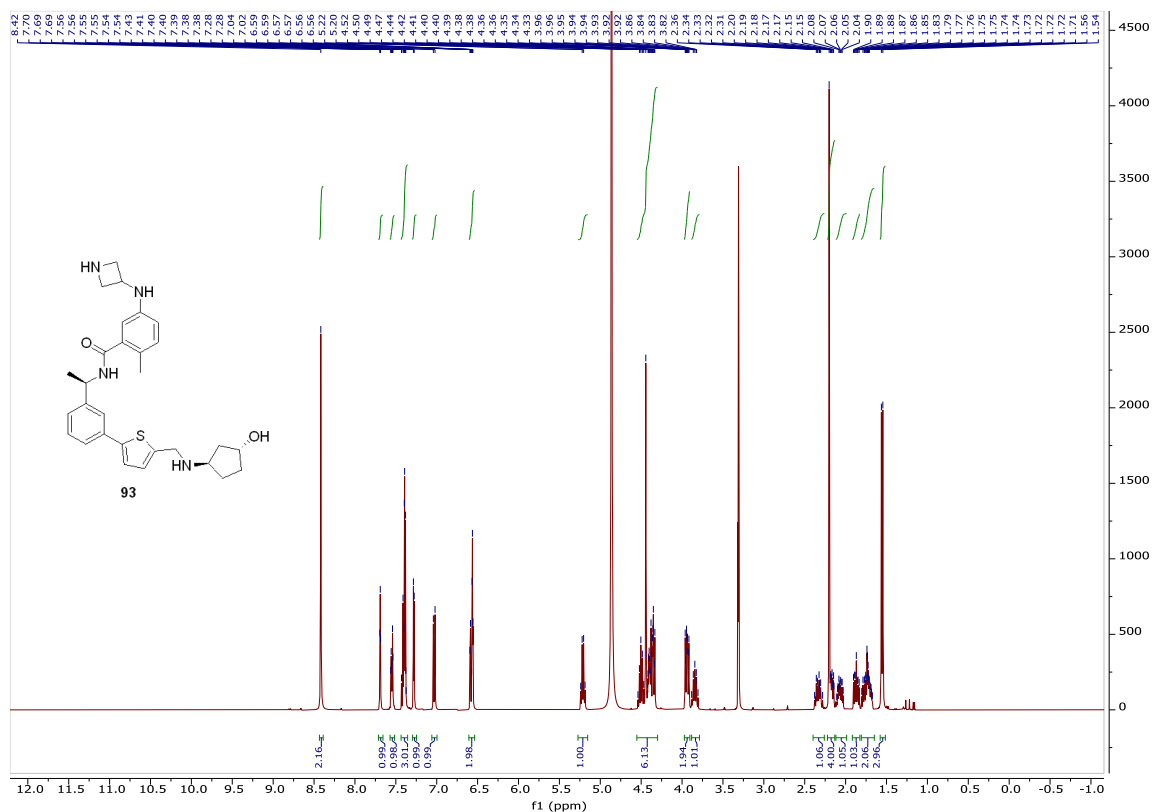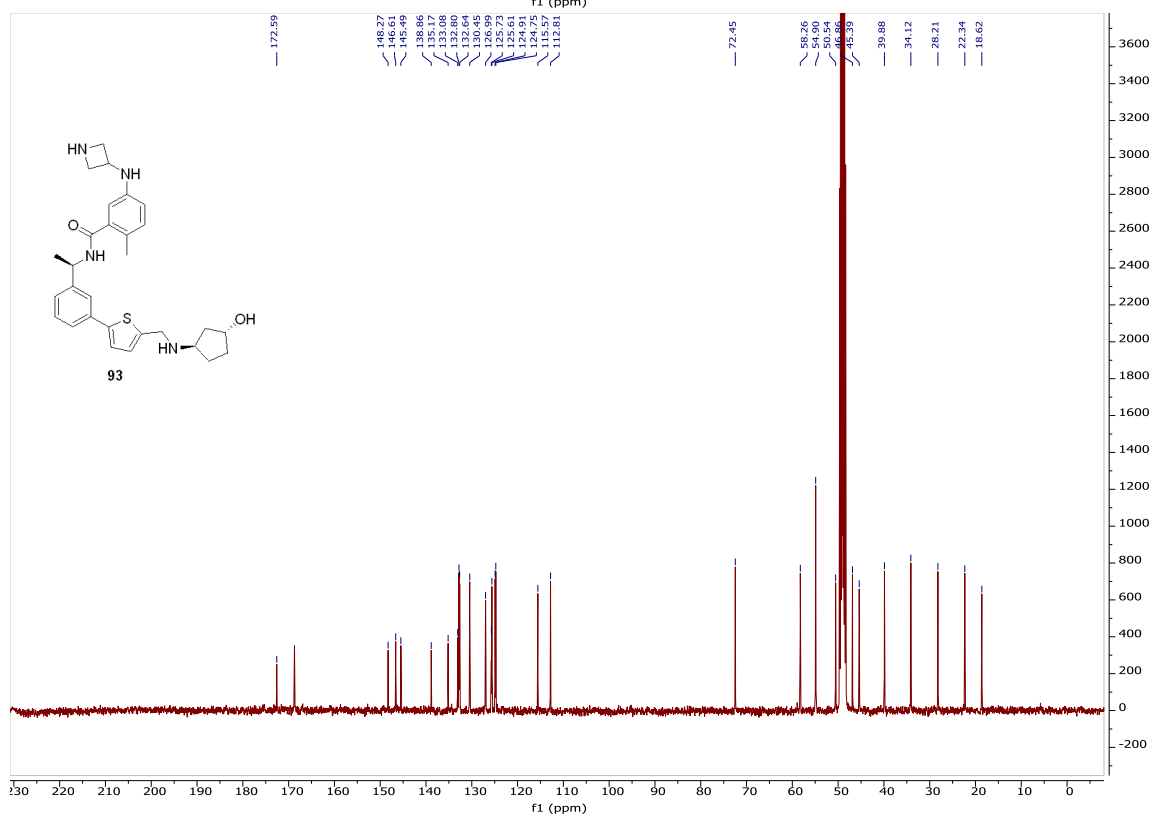

## Compound 94

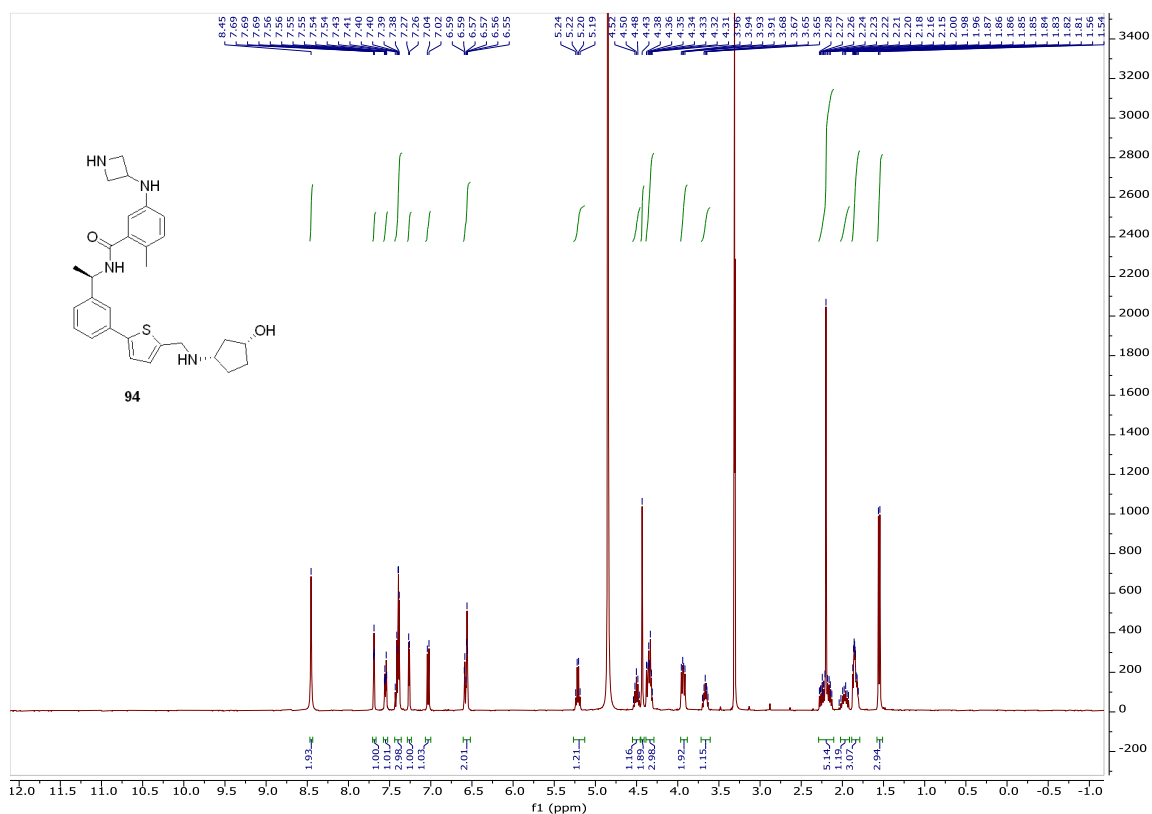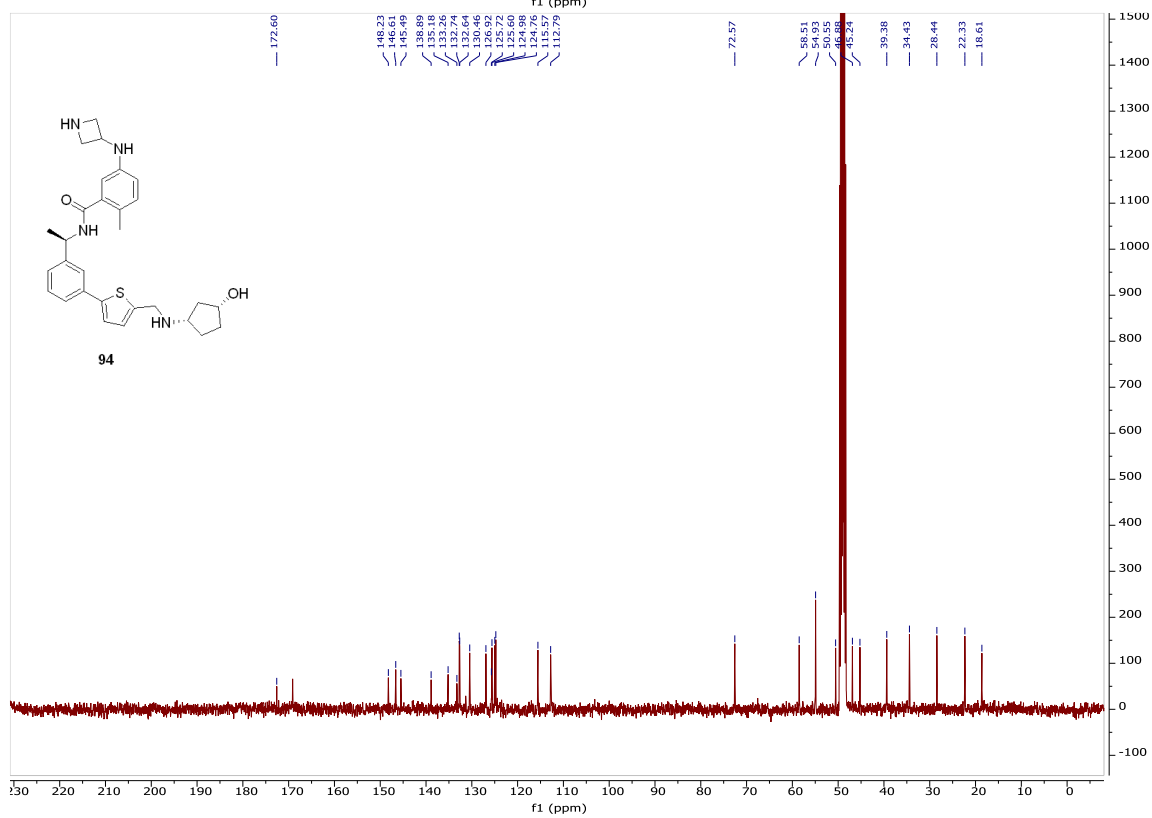



## Compound 95

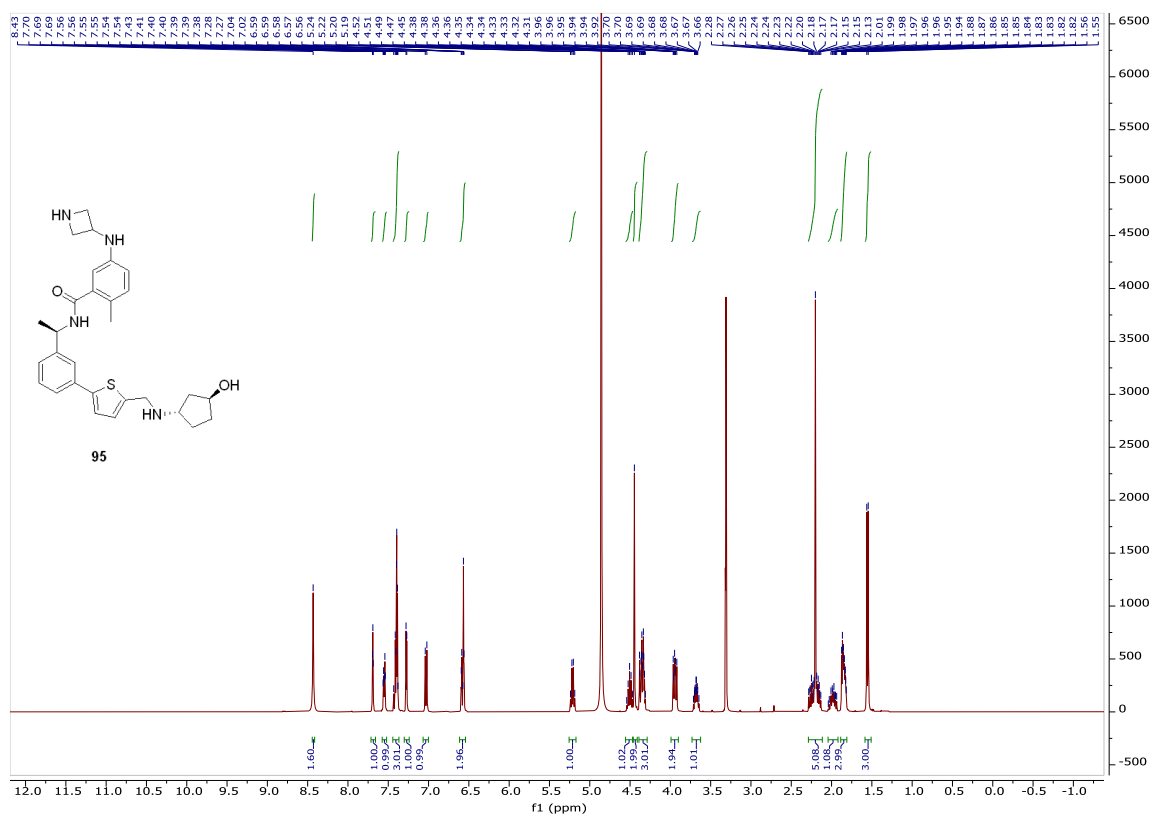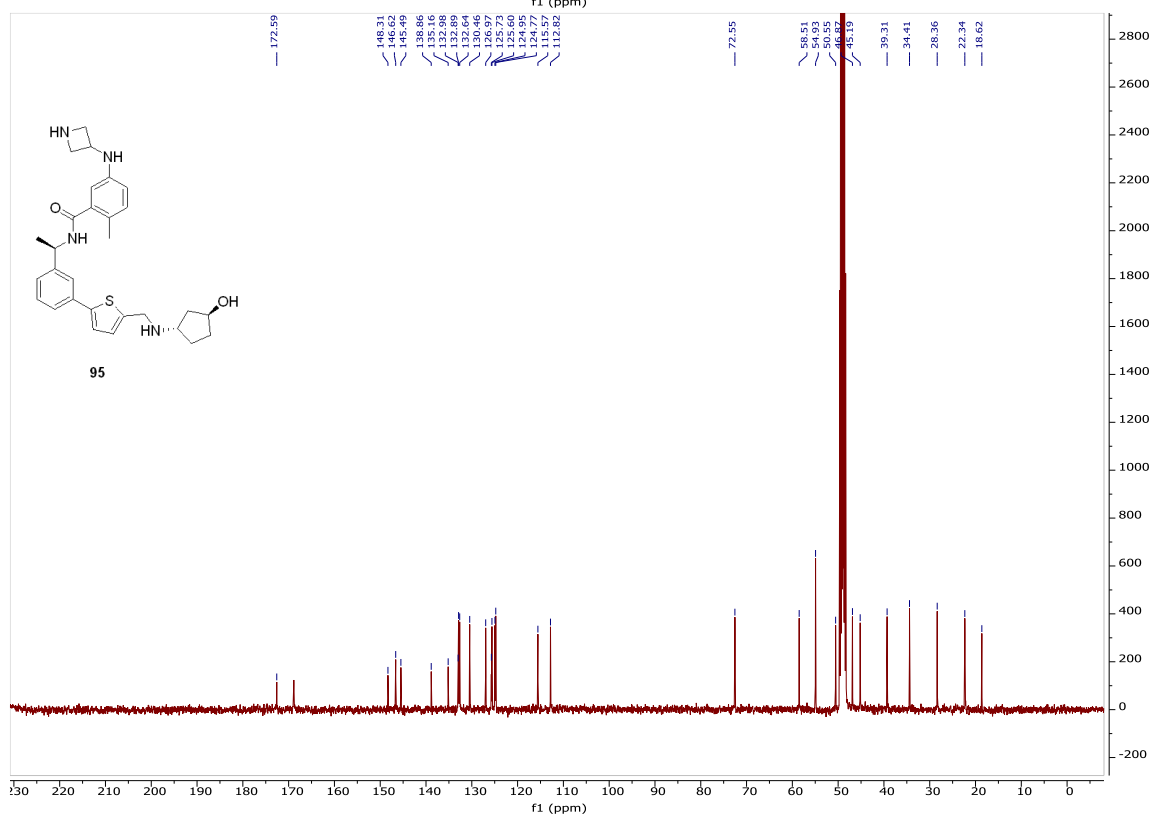

## Compound 96

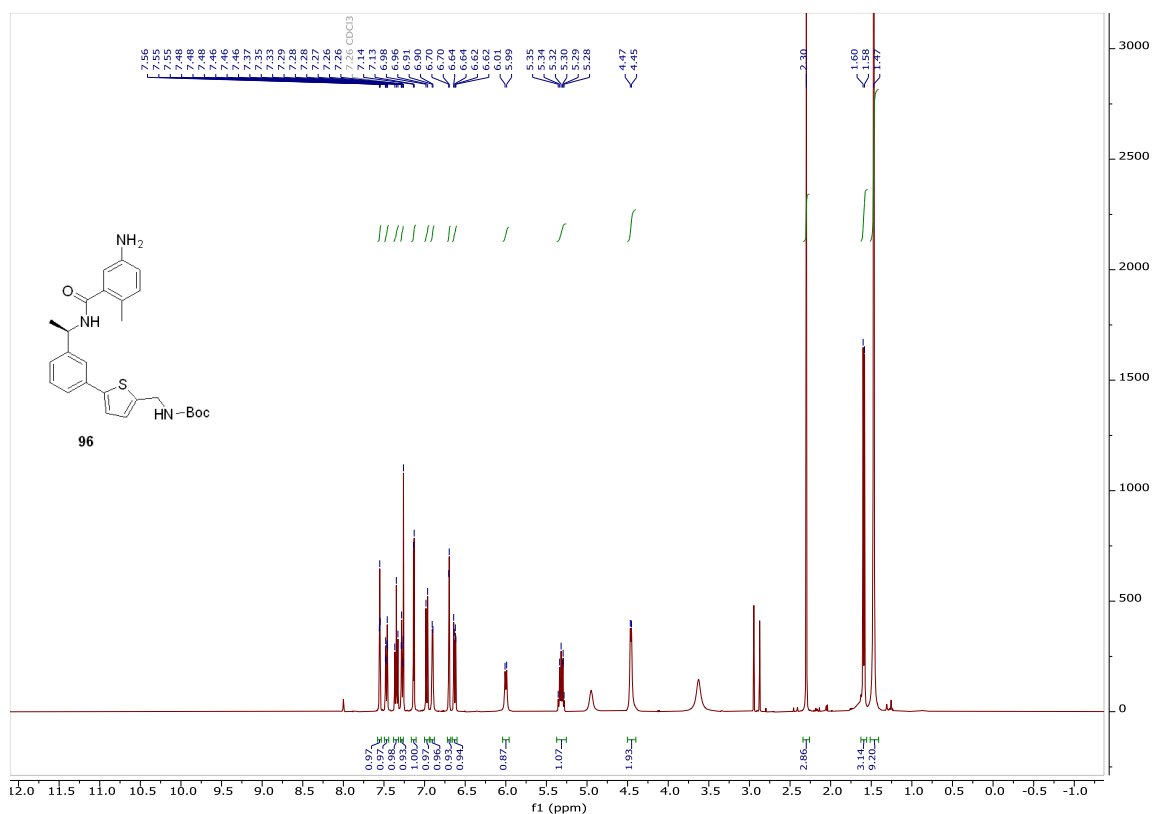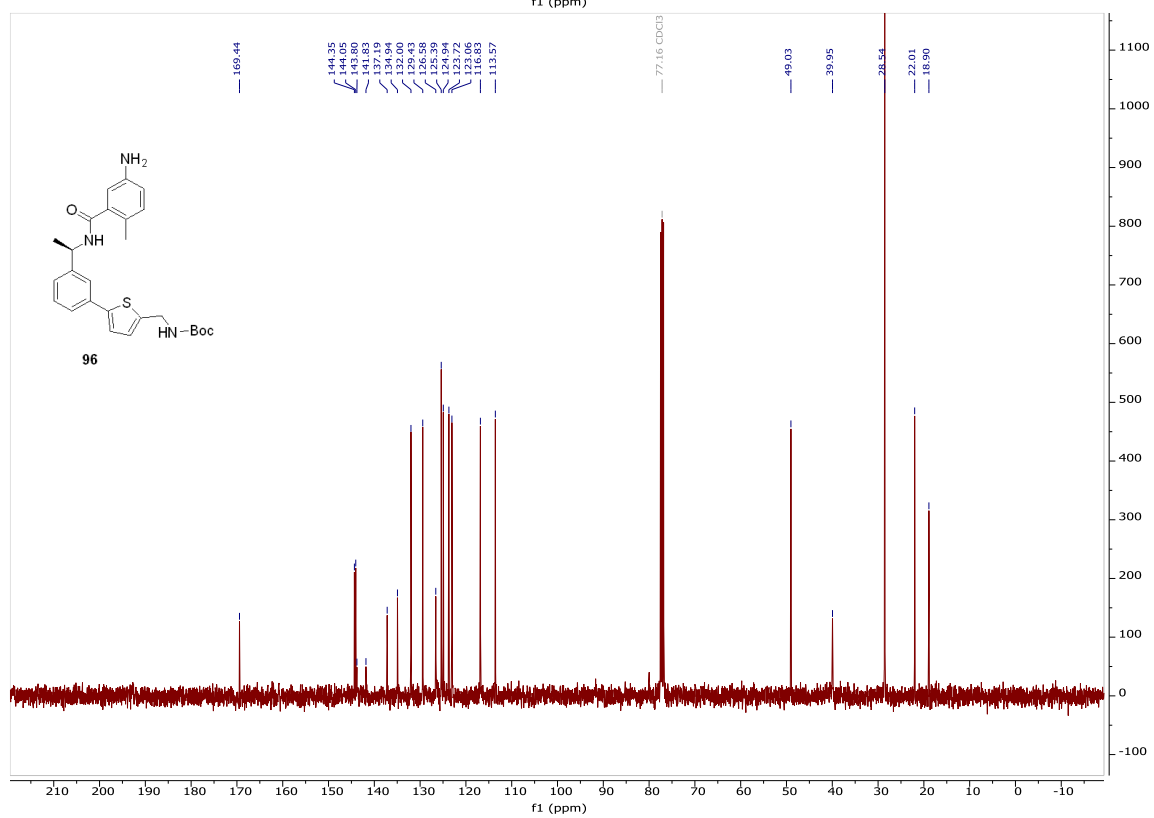

## Compound 98

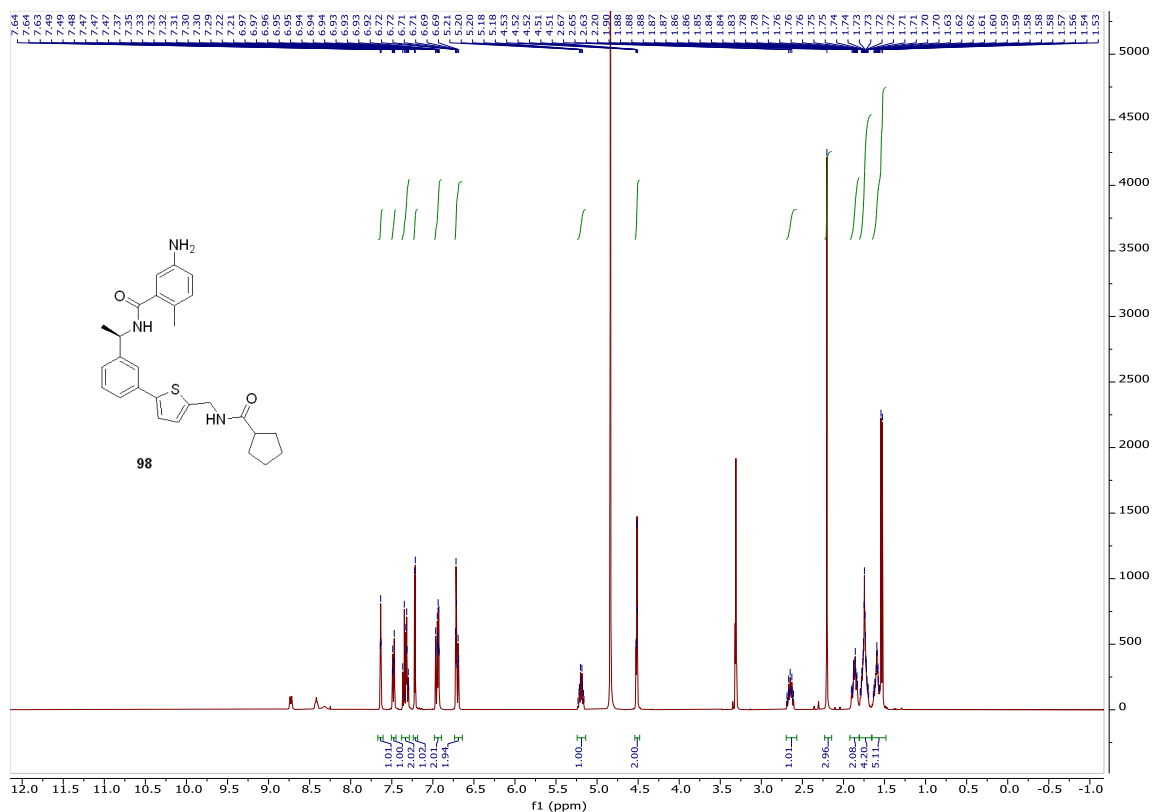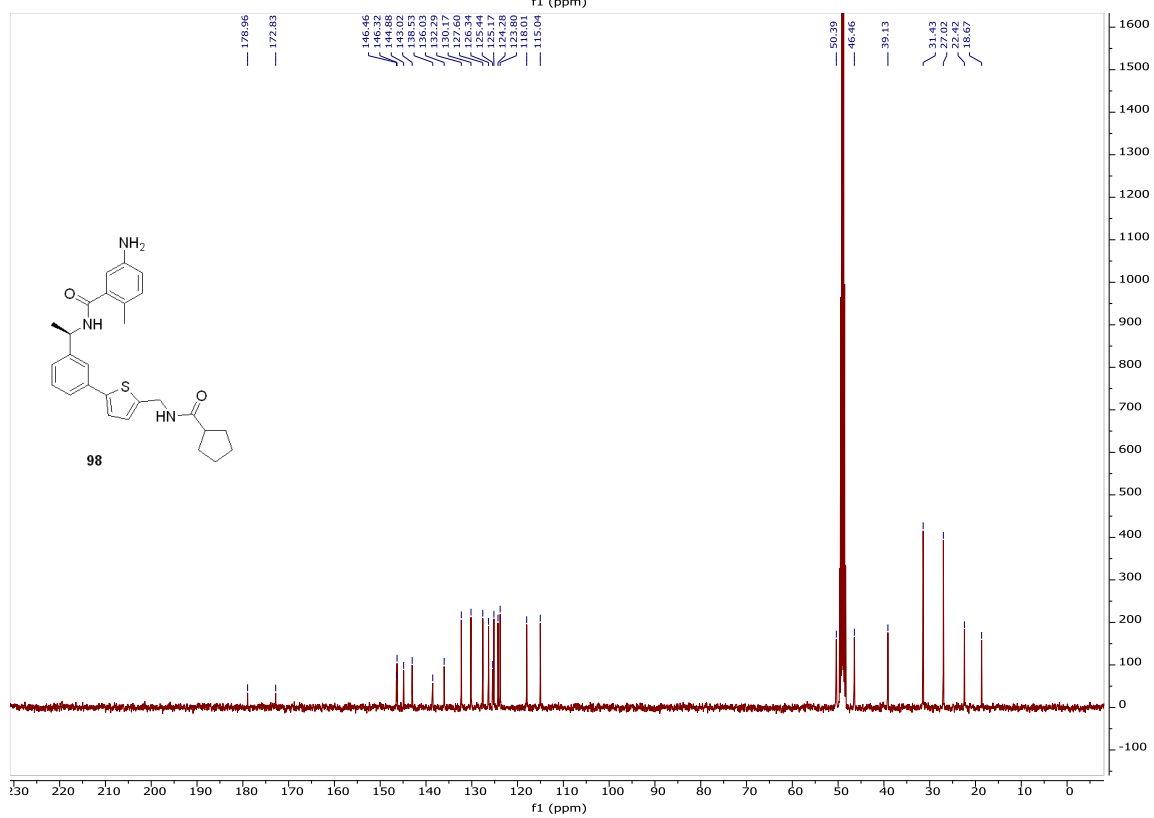

## Compound 100

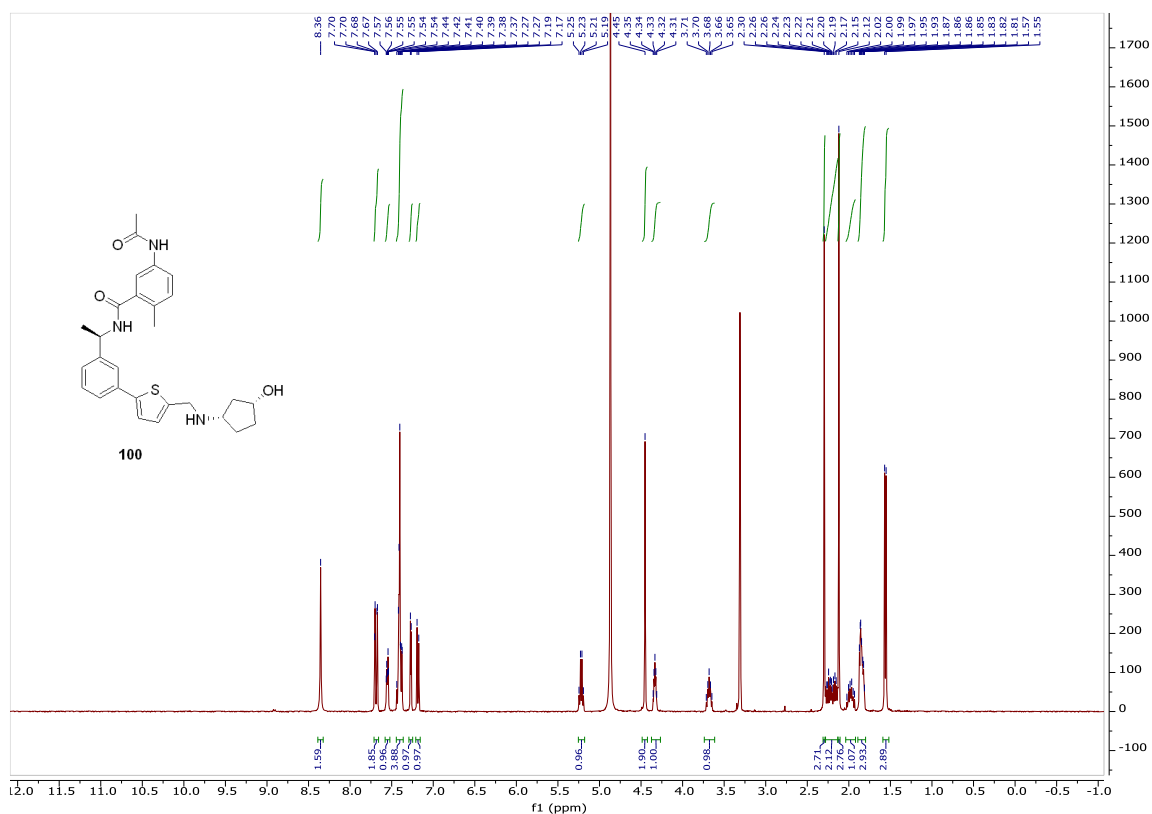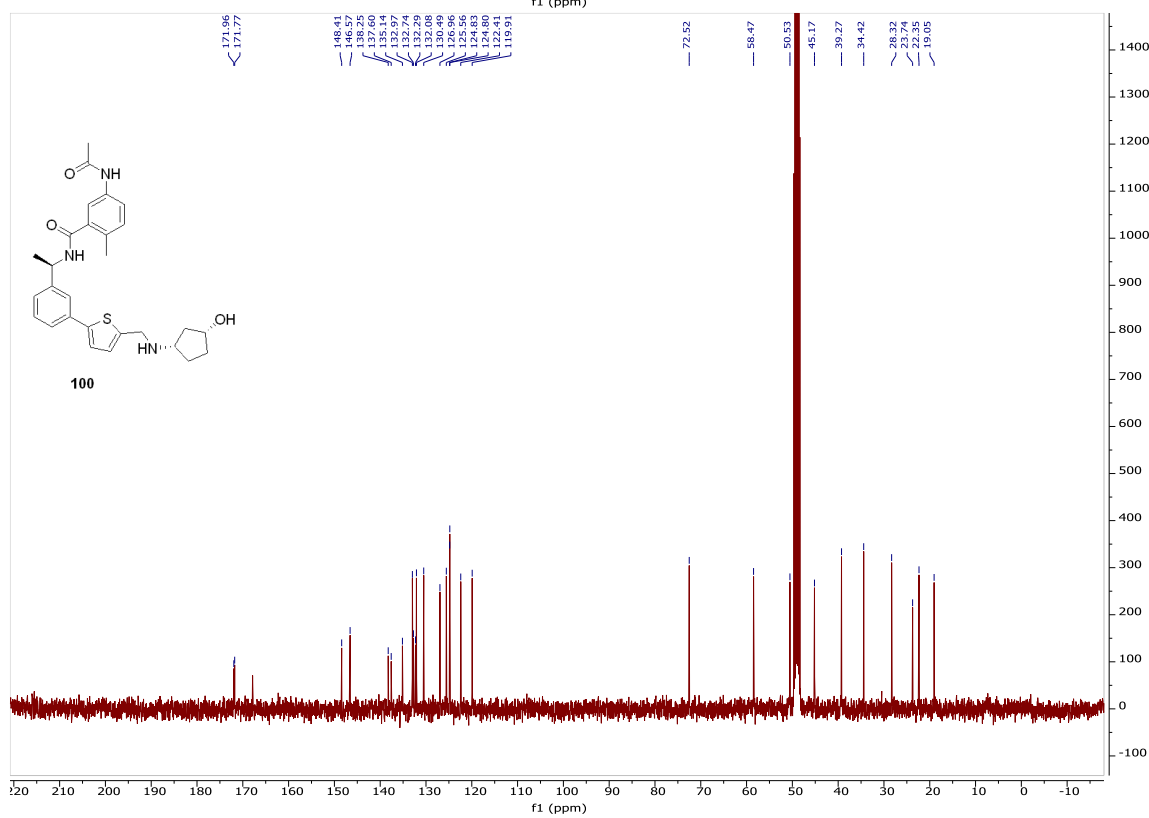

## HPLC Traces

## Compound 3

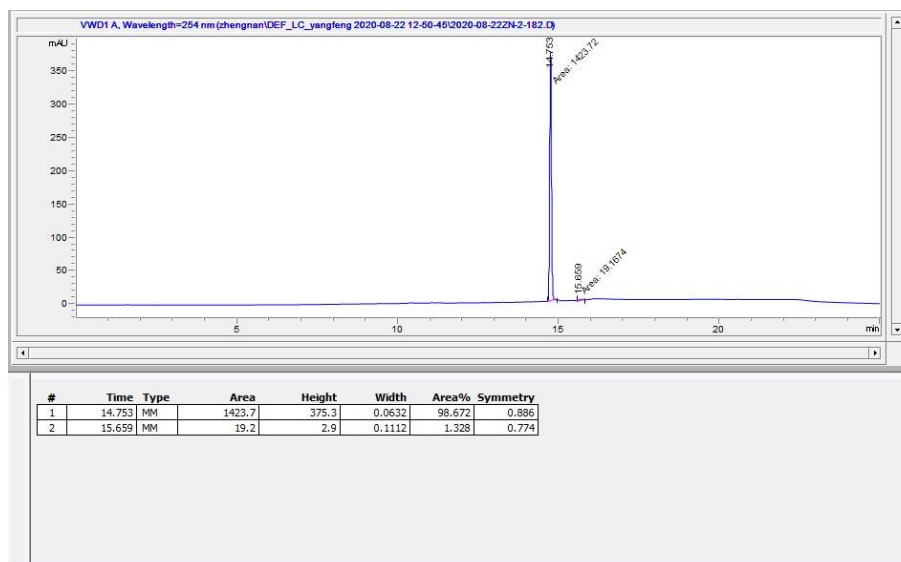

## Compound 5

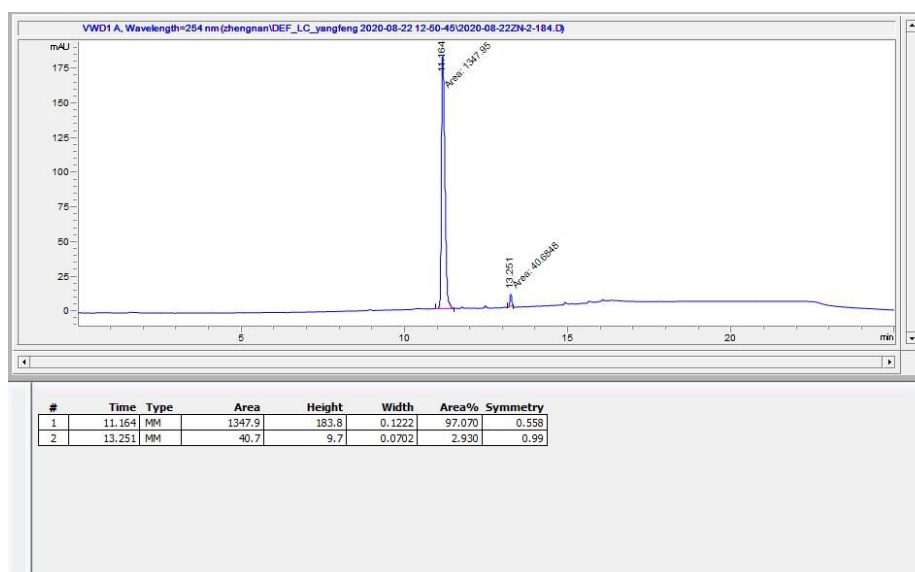

## Compound 6

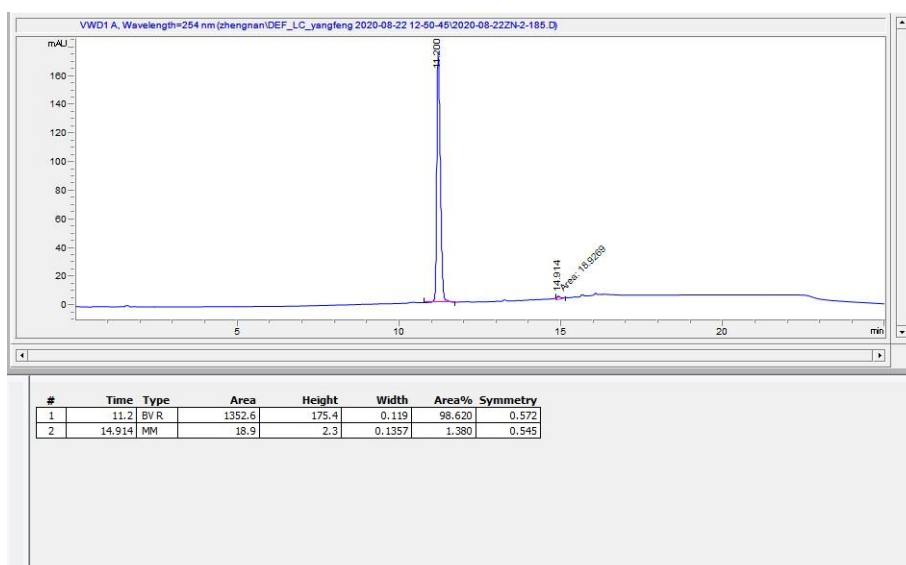

## Compound 7

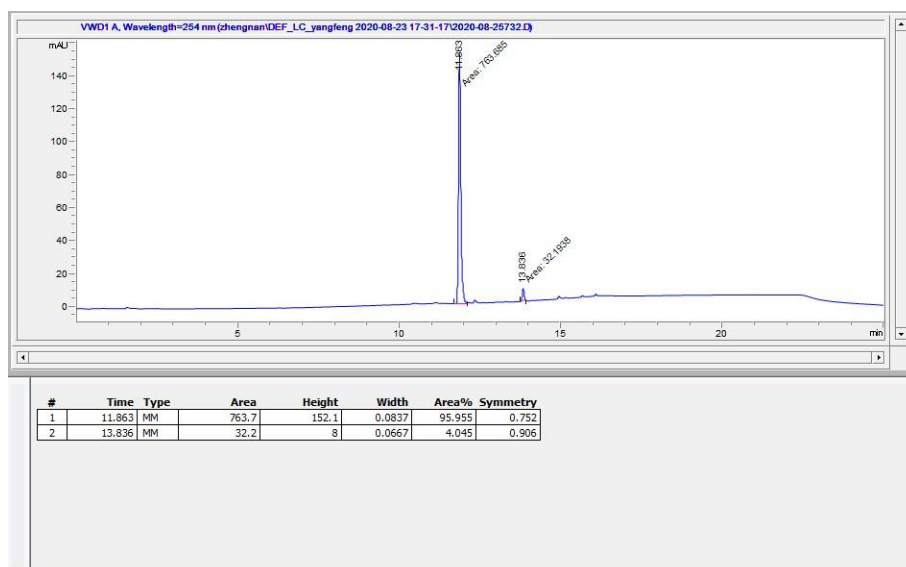

## Compound 11

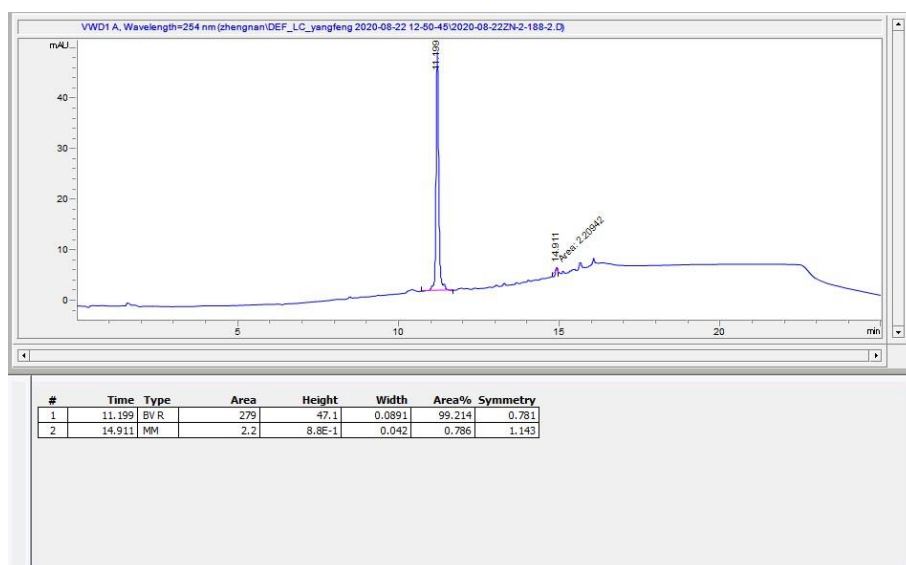

## Compound 12

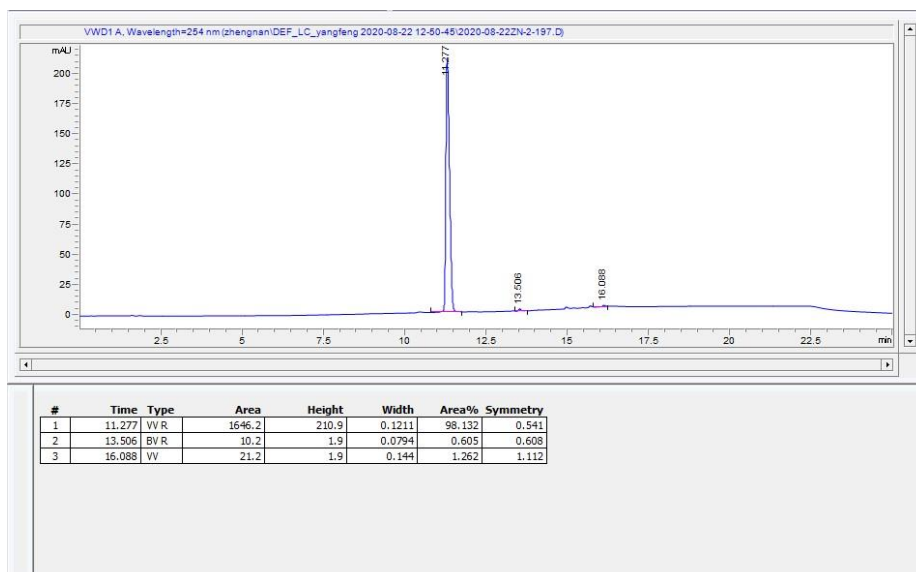

## Compound 13

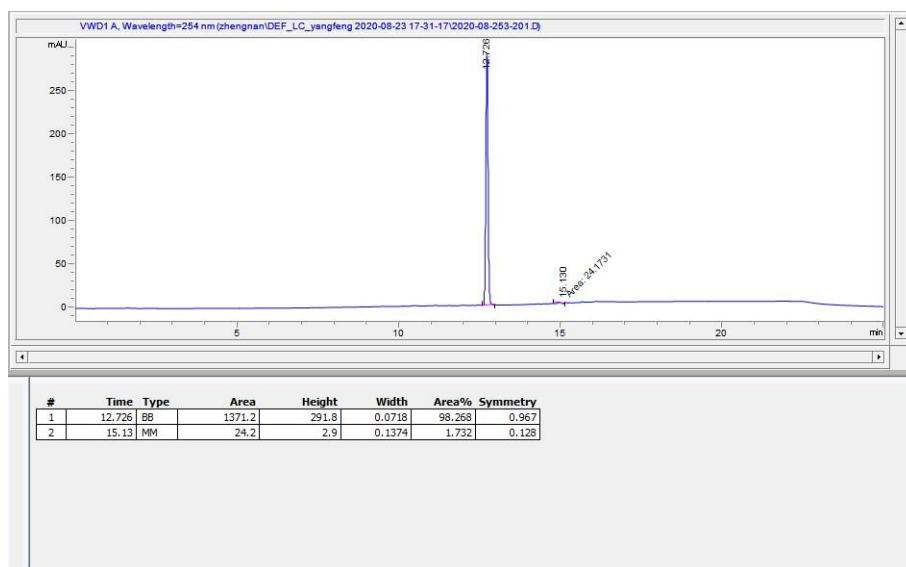

## Compound 19

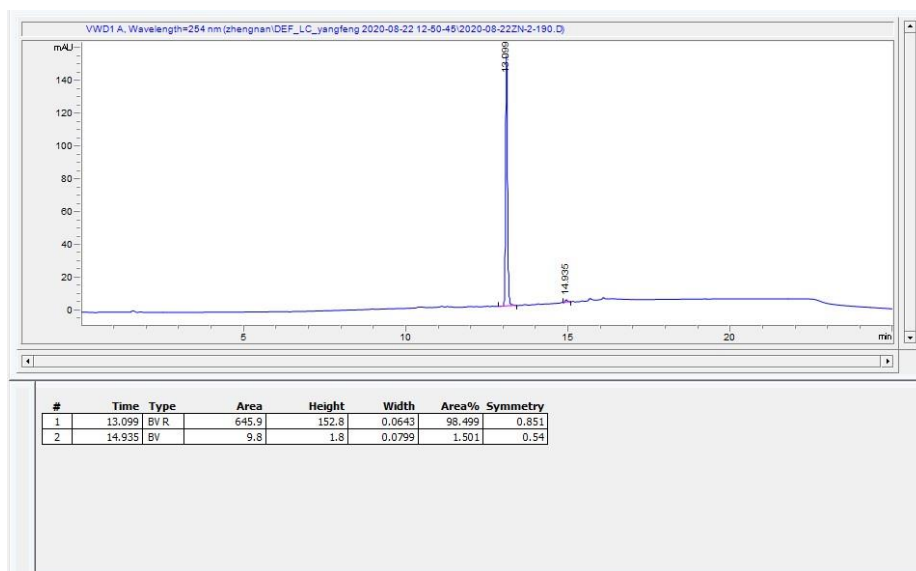

## Compound 20

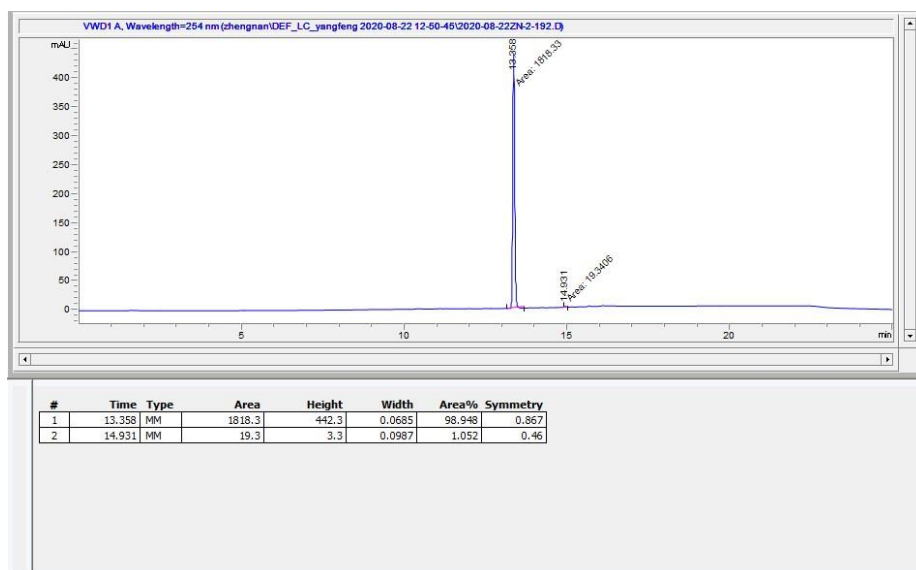



## Compound 21

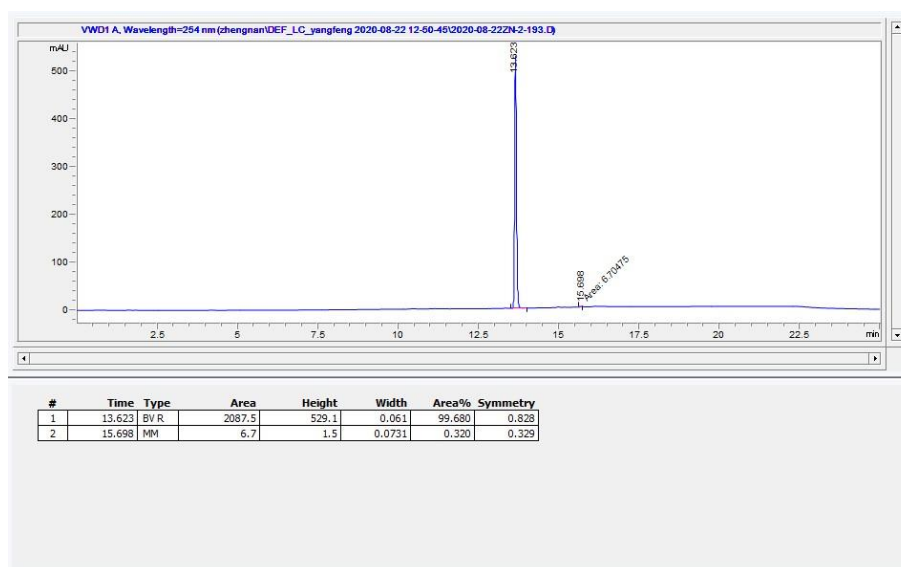

## Compound 22

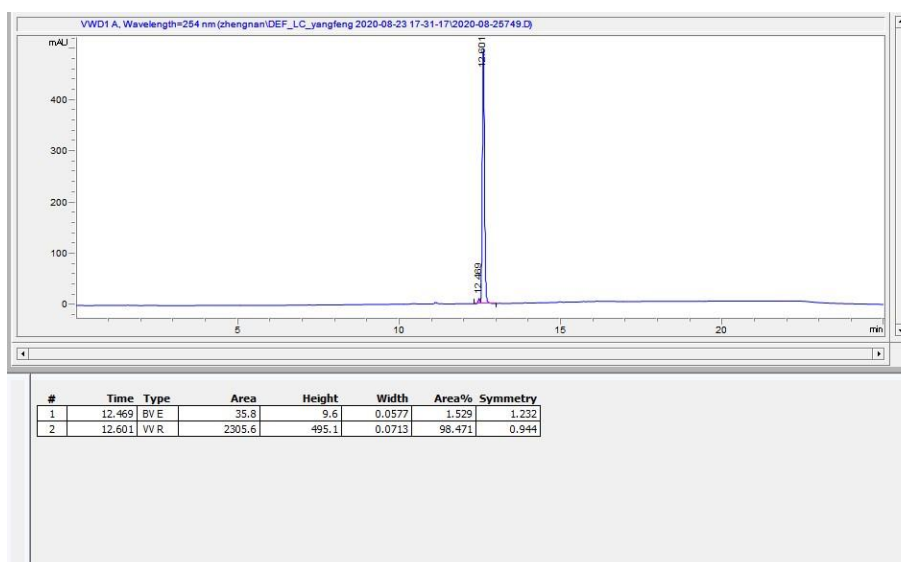

## Compound 23

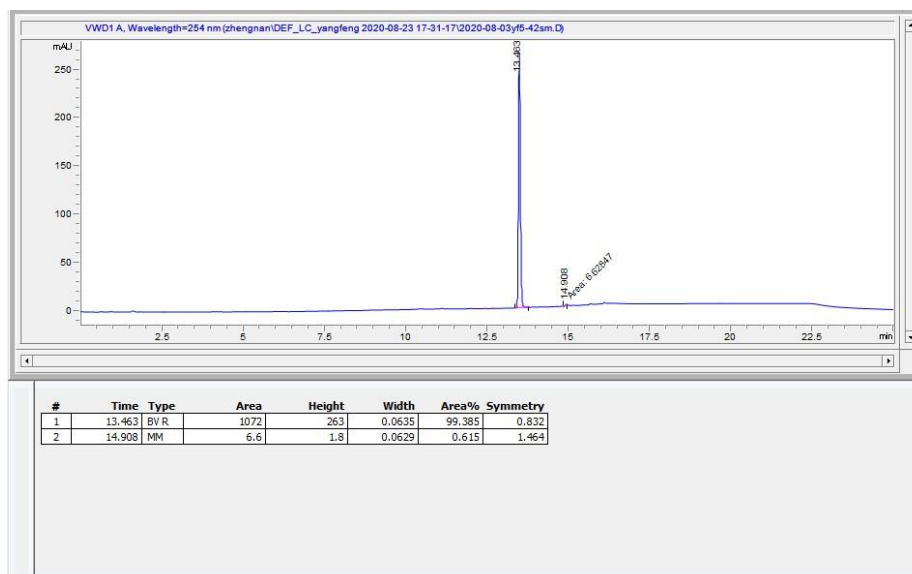

## Compound 38

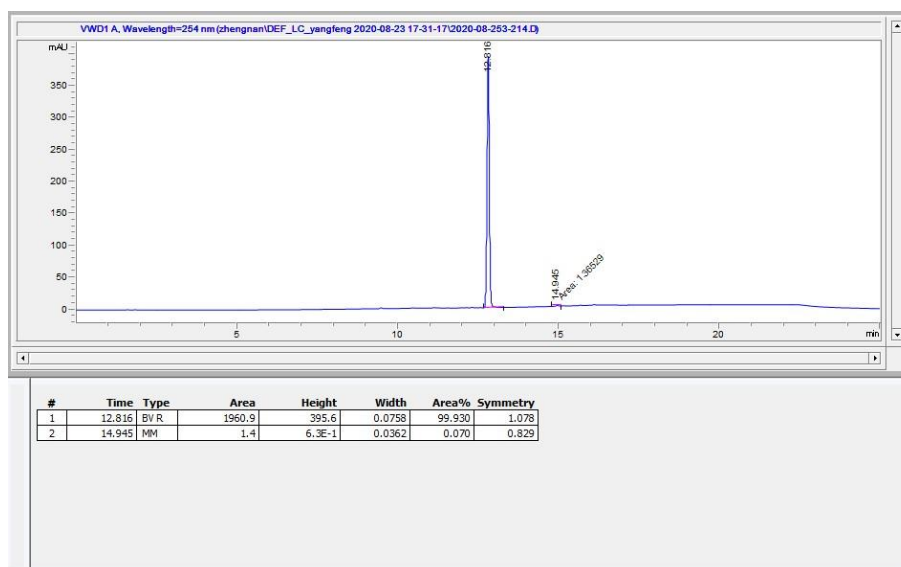

## Compound 43

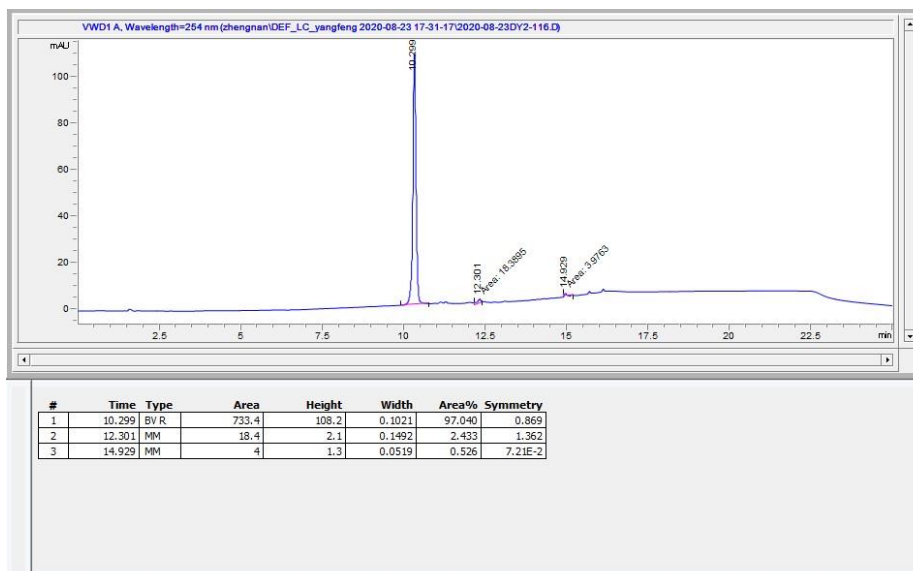

## Compound 52

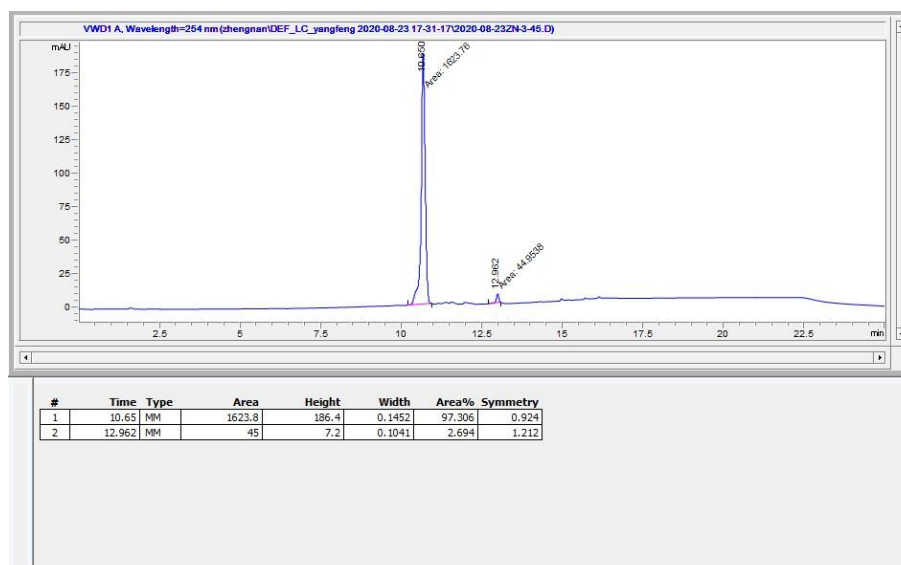

## Compound 59

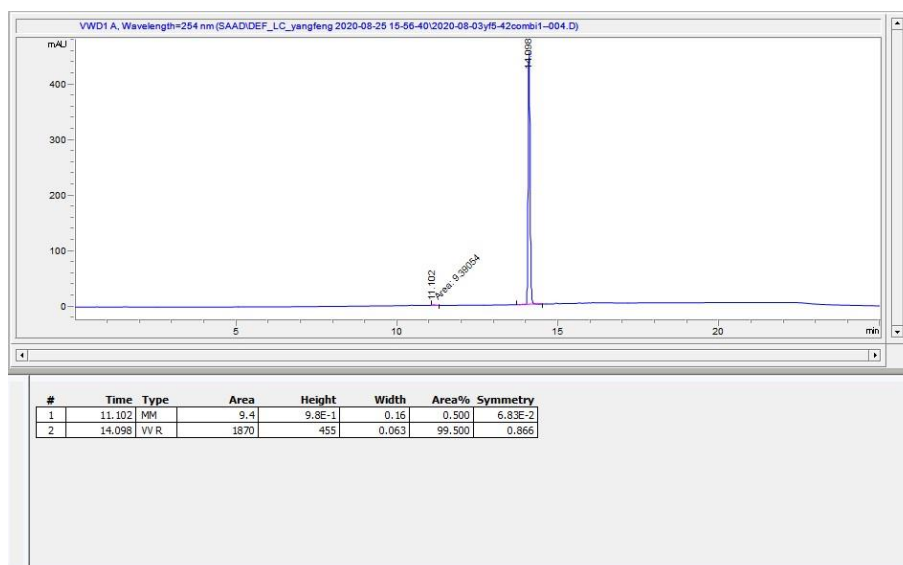

## Compound 61

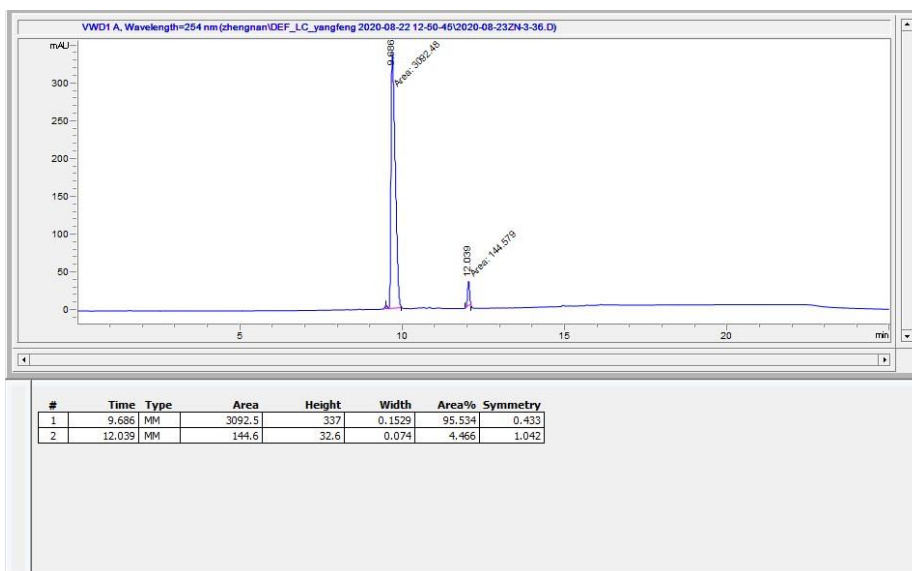

## Compound 65

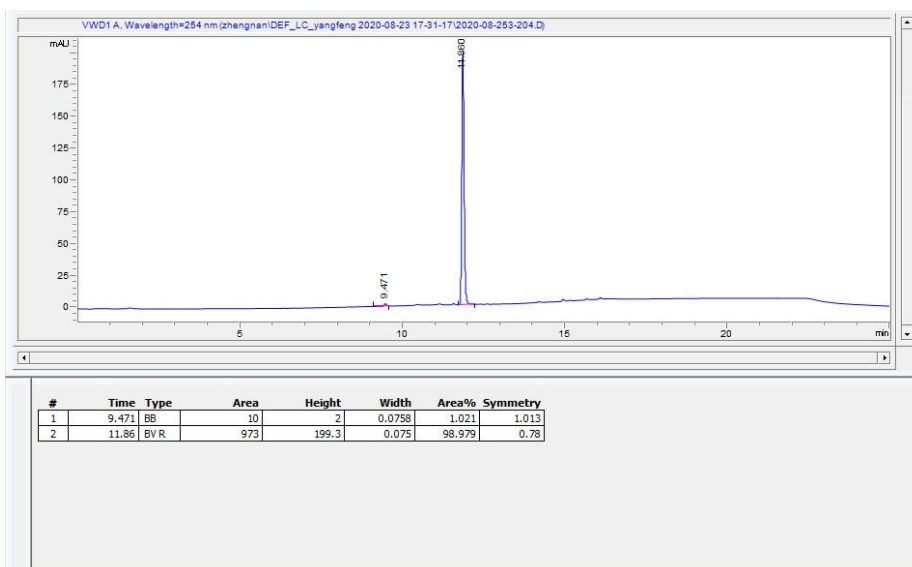

## Compound 72

## ==== Shimadzu LCsolution Analysis Report ====

Acquired by : Admin  
 Sample Name : XR8-23  
 Sample ID : XR8-23  
 Tray# : 1  
 Vial # : 16  
 Injection Volume : 10 uL  
 Data File Name : XR8-23-4.lcd  
 Method File Name : Purity-25min-pda.lcm  
 Batch File Name : zn.lcb  
 Report File Name : Default.lcr  
 Data Acquired : 7/23/2021 7:08:18 PM  
 Data Processed : 7/23/2021 8:21:55 PM

## &lt;Chromatogram&gt;

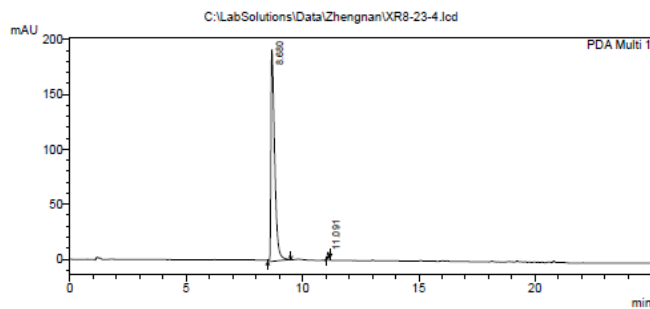

PeakTable

| Peak# | Ret. Time | Area    | Area %  |
|-------|-----------|---------|---------|
| 1     | 8.680     | 2124875 | 99.409  |
| 2     | 11.091    | 12653   | 0.591   |
| Total |           | 2137508 | 100.000 |

## Compound 73

## ==== Shimadzu LCsolution Analysis Report ====

Acquired by : Admin  
 Sample Name : XR8-24  
 Sample ID : XR8-24  
 Tray# : 1  
 Vial # : 31  
 Injection Volume : 10 uL  
 Data File Name : XR8-24-6.lcd  
 Method File Name : Purity-25min-pda.lcm  
 Batch File Name :  
 Report File Name : Default.lcr  
 Data Acquired : 7/23/2021 9:09:59 PM  
 Data Processed : 7/23/2021 9:35:03 PM

## &lt;Chromatogram&gt;

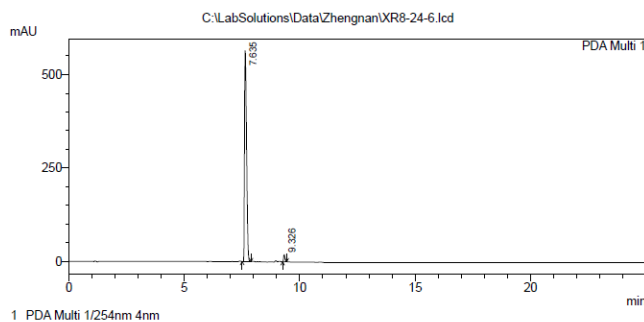

PeakTable

| Peak# | Ret. Time | Area    | Area %  |
|-------|-----------|---------|---------|
| 1     | 7.653     | 3498599 | 97.773  |
| 2     | 9.326     | 79687   | 2.227   |
| Total |           | 3578286 | 100.000 |

## Compound 94

## ==== Shimadzu LCsolution Analysis Report ====

C:\LabSolutions\Data\Zhengnan\XR8-89-5.lcd  
Acquired by : Admin  
Sample Name : XR8-89  
Sample ID : XR8-89  
Tray# : 1  
Vial # : 16  
Injection Volume : 10 uL  
Data File Name : XR8-89-5.lcd  
Method File Name : Purity-25min-pda.lcm  
Batch File Name :  
Report File Name : Default.lcr  
Data Acquired : 7/23/2021 8:41:14 PM  
Data Processed : 7/23/2021 9:06:17 PM

## &lt;Chromatogram&gt;

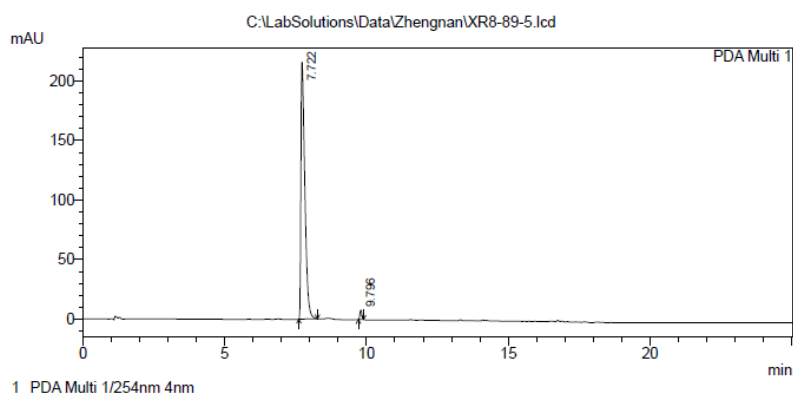

## PeakTable

| Peak# | Ret. Time | Area    | Area %  |
|-------|-----------|---------|---------|
| 1     | 7.722     | 2069148 | 98.203  |
| 2     | 9.796     | 37871   | 1.797   |
| Total |           | 2107019 | 100.000 |

## Supplemental Data 2

| complex<br>pdb ID                                         | 7LBS before<br>anisotropy<br>correction* | SARS-CoV2<br>PLpro:73<br>7LBS* | SARS-CoV2<br>PLpro:86<br>7LOS | SARS-CoV2<br>PLpro:89<br>7LLZ | SARS-CoV2<br>PLpro:92<br>7LLF |
|-----------------------------------------------------------|------------------------------------------|--------------------------------|-------------------------------|-------------------------------|-------------------------------|
| <b>Data Collection</b>                                    |                                          |                                |                               |                               |                               |
| Space Group                                               |                                          | P 1 21 1                       | P 1 21 1                      | P 1 21 1                      | P 1 21 1                      |
| Cell Dimensions<br>a,b,c (Å)                              |                                          | 46.60, 145.94,<br>60.05        | 46.56, 146.18,<br>60.32       | 46.76, 146.16,<br>60.30       | 46.71, 147.37,<br>60.28       |
| $\alpha, \beta, \gamma$ (deg)                             |                                          | 90, 99.78, 90                  | 90, 99.53, 90                 | 90, 99.38, 90                 | 90, 99.71, 90                 |
| Resolution (Å)                                            |                                          | 45.96 (2.80)                   | 48.3 (2.90)                   | 48.72 (2.90)                  | 46.25 (2.30)                  |
| Unique Observations                                       | 19,329 (2,810)                           | 15,539 (801)                   | 17,292 (2801)                 | 17,723 (1297)                 | 33,852 (2626)                 |
| Completeness (%)                                          | 98.8 (98.3)                              | 79.6 (28.2)                    | 98.1 (99.4)                   | 99.9 (100)                    | 95.1 (76.1)                   |
| Redundancy                                                | 3.8 (3.8)                                | 3.8 (3.8)                      | 3.0 (3.1)                     | 6.3 (5.7)                     | 5.2 (4.5)                     |
| $R_{\text{merge}}$                                        | 0.262 (1.07)                             | 0.206 (0.421)                  | 0.203 (0.794)                 | 0.174 (0.377)                 | 0.141 (2.161)                 |
| $I/\sigma$                                                | 5.7 (1.4)                                | 4.7 (2.2)                      | 4.7 (1.4)                     | 8.0 (3.3)                     | 5.0 (0.5)                     |
| Source                                                    |                                          | LS-CAT ID-F                    | LS-CAT ID-D                   | LS-CAT ID-G                   | LS-CAT ID-D                   |
| Collection date                                           |                                          | 9/23/2020                      | 11/12/2020                    | 11/5/2020                     | 11/12/2020                    |
| Wavelength                                                |                                          | 0.9787                         | 1.1271                        | 0.9786                        | 1.1271                        |
| <b>Refinement</b>                                         |                                          |                                |                               |                               |                               |
| Resolution (Å)                                            |                                          | 45.96-2.80                     | 48.3-2.90                     | 46.14-2.90                    | 46.04-2.30                    |
| $R_{\text{work}}/R_{\text{free}}$ (%)                     |                                          | 21.2/24.3                      | 22.3/28.4                     | 20.5/24.9                     | 21.7/25.2                     |
| Number of atoms<br>(protein/other/solvent)                |                                          | 5020/118/16                    | 5020/103/16                   | 5014/98/27                    | 5020/118/33                   |
| Mean B-Factors (Å <sup>2</sup> )<br>(protein/other/water) |                                          | 41.0/51.5/21.9                 | 54.9/69.9/31.3                | 38.1/49.2/17.2                | 57.5/118/43.4                 |
| R.M.S.D. Bond (Å)                                         |                                          | 0.013                          | 0.012                         | 0.013                         | 0.016                         |
| R.M.S.D. Angle (°)                                        |                                          | 1.71                           | 1.67                          | 1.55                          | 1.70                          |
| Ramachandran favored (%)                                  |                                          | 97.6                           | 96.5                          | 95.1                          | 97.8                          |
| Ramachandran outliers (%)                                 |                                          | 0                              | 0                             | 0                             | 0                             |
| Rotamer outliers (%)                                      |                                          | 1.45                           | 3.1                           | 2.0                           | 2.4                           |
| Molecules in ASU                                          |                                          | 2                              | 2                             | 2                             | 2                             |
| <b>Programs Used</b>                                      |                                          |                                |                               |                               |                               |
| Processing                                                |                                          | XDS                            | XDS                           | Xia2                          | XDS                           |
| Scaling                                                   |                                          | XDS                            | XDS                           | Aimless                       | XDS                           |
| Phasing                                                   |                                          | Molrep                         | Molrep                        | Molrep                        | Molrep                        |
| Phasing Model                                             |                                          | 7JRN                           | 7JRN                          | 7JRN                          | 7JRN                          |
| Manual Build                                              |                                          | Coot                           | Coot                          | Coot                          | Coot                          |
| Refinement                                                |                                          | Refmac                         | Refmac                        | Refmac                        | Refmac                        |

\* ellipsoidal truncation and anisotropic scaling performed on UCLA-DOE LAB's Diffraction Anisotropy Server

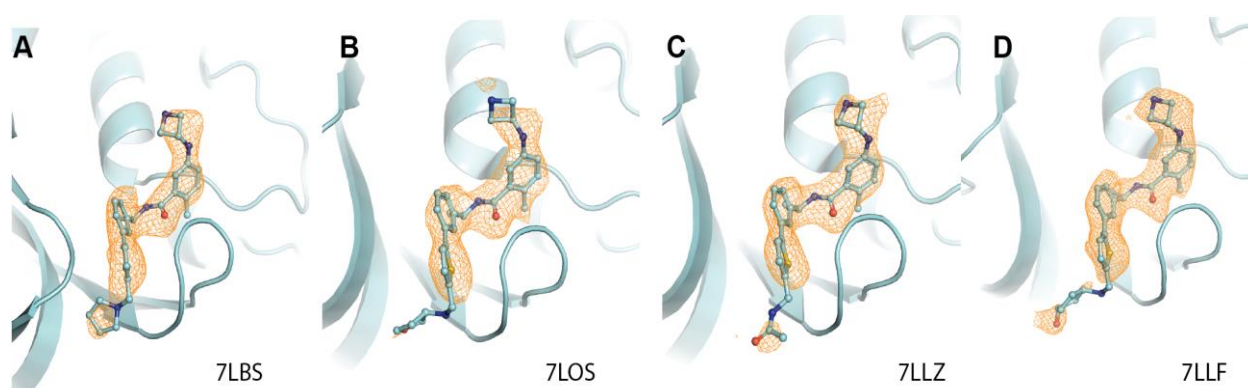

Fo-Fc density maps of PLpro complexed to A) 73, B) 86, C) 89, and D) 92. The maps are contoured at 2 sigma and are shown as orange mesh. PDB IDs are shown below each structure.
